# Supplementary material
Source: Research Square preprint supplement (doi:10.21203/rs.3.rs-9722888/v1)
Supplement: Supplementary file 1 [file 6ac286790731b88240ef1649.xlsx]

## Sheet: date
id	year	x1	x2	x3	x4	x5	x6	x7	x8	ag_green	ag_mech	m1	m2	urban	gdp_per	crop_struct	human_cap	ag_struct	fis_agr	ag_green_new	risk
110000	2008	75.8447	97.568	57.4547	167.769	15.7926	45.059	10051.5	5.54279	47.7438	6.34912	91.3894	0.593995	84.9	11.2983	70.9476	5.34185	42.152	6.21501	20.8389	1
110000	2009	77.1403	97.627	53.2623	187.145	13.5749	53.8368	10942.2	5.51372	49.2525	6.61279	102.777	0.8242	85.01	11.4881	71.4389	5.79035	46.3978	6.12278	22.612	1
110000	2010	78.4327	97.3772	52.8737	149.608	13.8512	55.3881	12368.2	5.17698	49.3993	6.90244	109.631	0.916899	85.96	11.6281	71.255	5.68943	47.0154	5.83811	23.4434	1
110000	2011	76.6586	97.4208	67.2733	159.132	12.4841	47.6403	13742.2	5.81574	49.9763	6.80793	114.777	1.1059	86.23	11.7533	70.1159	6.20636	44.9882	5.77278	24.1225	1
110000	2012	73.2489	97.4388	54.6778	167.464	12.3979	52.5858	15364.9	5.86837	50.6114	6.35195	118.29	1.35051	86.2	11.8336	69.7299	6.37883	42.0232	6.04264	24.8003	1
110000	2013	64.1629	97.4328	41.3764	187.113	14.0967	53.9057	17101.2	6.04934	50.6765	5.61672	129.428	1.50899	86.3	11.906	66.9687	6.55746	40.4026	7.13091	24.7527	1
110000	2014	54.369	96.8022	39.9751	207.152	14.9147	62.7756	18867.3	5.3208	51.3349	5.46819	129.247	1.26149	86.4	11.9828	61.7396	7.38921	36.9224	7.59547	26.6737	1
110000	2015	50.6165	94.9969	40.3867	193.796	15.47	62.5985	20568.7	5.99713	51.6834	5.47066	142.412	1.68795	86.51	12.0499	60.6774	7.48687	41.9509	7.40331	27.7289	1
110000	2016	45.284	94.5099	39.97	208.588	17.8976	61.1147	22309.5	6.16787	51.7146	4.49418	145.885	1.86711	86.5	12.1459	58.7702	6.96597	42.951	6.92315	28.259	1
110000	2017	39.2209	95.9367	37.4502	223.251	19.365	64.676	24240.5	6.152	53.1286	4.32974	147.156	2.07144	86.45	12.2363	55.2671	7.47972	42.1088	7.59539	29.6199	1
110000	2018	34.5126	97.5273	36.4678	223.143	20.0308	71.2635	26490.3	6.13587	55.2933	4.17815	152.038	2.58437	86.5	12.303	53.6082	7.57963	38.6663	7.7099	31.8677	1
110000	2019	29.8787	98.5483	36.8599	243.93	19.8532	67.1983	28928.4	6.18229	55.7608	4.14488	159.998	2.75262	86.6	12.4419	52.5353	7.65301	36.3259	7.89154	32.3217	1
110000	2020	33.2874	99.5211	37.0746	207.782	16.979	64.2788	30125.7	6.24335	56.2571	4.076	171.429	3.36895	87.55	12.4563	49.8065	8.33619	40.8344	6.98872	32.5011	1
110000	2021	39.8243	100.332	36.9418	162.919	13.6275	72.5132	33302.7	6.19665	58.8729	4.09733	188.233	4.40963	87.5	12.5595	51.6928	7.99952	45.631	6.90995	35.7514	1
110000	2022	47.68	101.923	37.1798	141.854	13.9072	73.2975	34753.8	5.91164	59.7961	4.01638	190.558	5.02369	87.57	12.5824	53.3551	8.50125	48.3891	6.19602	36.688	1
110000	2023	51.8988	101.562	38.521	120.77	12.5802	71.9416	37357.9	5.34034	59.6741	4.04601	195.108	5.83899	87.8	12.6337	56.2775	8.22117	53.6775	6.46737	37.638	1
120000	2008	53.8717	98.9357	42.9144	441.901	14.7804	30.1743	7705.18	5.08869	44.016	7.35583	45.8289	0.0250414	77.21	11.0911	67.2213	3.52915	46.9384	4.44152	15.103	1
120000	2009	54.8946	98.8958	43.3088	458.404	13.3792	33.6903	8441.29	5.12225	44.8657	7.41802	48.5412	0.0383119	78.02	11.2485	69.6691	4.08622	48.5772	5.66496	16.2021	1
120000	2010	55.3887	98.7635	43.5013	465.746	13.0589	31.3055	9764.25	5.15657	44.8439	7.41988	57.7028	0.0450401	79.57	11.4475	70.9627	4.01724	51.6637	4.87638	16.4491	1
120000	2011	56.6359	98.616	46.7487	432.049	12.8738	36.744	11941.3	5.25187	46.4906	7.47383	62.6575	0.0735005	80.5	11.6394	70.2158	4.63777	49.7707	5.10931	18.8969	1
120000	2012	58.4448	98.335	43.8733	427.369	11.927	35.531	13593	5.06503	46.3363	7.39549	66.1235	0.121711	81.56	11.7739	71.923	4.43992	50.1435	4.71162	19.192	1
120000	2013	58.4986	98.208	40.94	416.821	11.0504	42.2685	15352.6	5.31305	47.9646	7.34553	71.4988	0.21934	82	11.8715	75.6718	4.87319	50.3047	4.8262	21.2204	1
120000	2014	59.7844	98.2196	41.6821	415.25	10.467	35.2042	17014.2	5.1402	47.1846	7.45371	77.1044	0.265677	82.27	11.9492	78.2511	4.66105	49.5527	4.67674	20.7164	1
120000	2015	59.5901	98.1225	42.4797	429.284	10.3697	36.8938	18481.6	5.23868	47.9364	7.52193	82.4612	0.352771	82.64	11.9895	81.2754	4.91878	48.2269	4.82869	21.8761	1
120000	2016	62.1672	98.151	42.9646	402.741	8.88518	36.9274	20075.6	5.53591	48.7971	6.58566	82.2633	0.410211	82.91	12.0513	81.594	4.49752	45.9817	4.35256	22.9048	1
120000	2017	62.4236	98.6598	43.5483	383.054	8.53431	39.6111	21753.7	6.04069	50.4514	6.59928	100.393	0.545483	82.92	12.082	79.9509	4.55053	47.9415	4.82431	24.5561	1
120000	2018	61.3561	99.3673	43.5454	61.4998	7.40327	42.2989	23065.2	5.98755	51.58	4.97372	114.864	0.711669	83.15	12.0659	81.5827	5.10961	50.5019	5.34004	25.6997	1
120000	2019	58.8938	99.5697	43.7537	61.423	7.38538	47.2204	24804.1	6.5803	53.511	5.16546	123.296	0.733923	83.48	11.7542	82.6943	5.02783	48.9707	4.54227	27.7607	1
120000	2020	60.3103	99.7696	43.0375	57.256	6.5415	50.8	25690.6	6.51571	54.3357	5.25278	147.685	0.876692	84.7	11.7332	83.5461	5.53814	48.0144	4.91282	28.8225	1
120000	2021	62.6877	100.3	40.945	54.9199	5.67506	51.8381	27954.5	6.69032	55.4507	5.34323	163.185	0.905356	84.88	11.8222	85.4645	5.81248	50.7383	4.69493	30.1163	1
120000	2022	63.1685	100.717	41.8711	51.4081	4.50948	47.4856	29017.8	6.80198	55.4382	5.28082	176.081	0.930514	85.11	11.8529	84.9293	6.01178	53.0838	4.04054	29.9735	1
120000	2023	64.0504	100.756	43.6804	45.0232	4.41404	52.7085	30851	6.55668	56.5984	5.21337	172.244	1.05093	85.49	11.8653	86.0803	5.5621	52.6914	3.86993	31.9288	1
130100	2008	112.93	99.3434	55.7864	679.593	3.01984	27.2899	5469	6.70481	46.3182	21.5574	56.089	0.0874149	41.21	10.2877	75.0037	3.40911	50.8065	8.45689	16.2743	1
130100	2009	112.322	99.3315	54.2302	442.757	2.99432	31.1828	5977	6.58257	46.9097	21.7983	57.7618	0.0364423	49.15	10.3322	75.9811	3.72562	51.9468	9.36933	17.0704	1
130100	2010	116.033	99.2337	54.607	469.513	3.00913	30.8331	6577	6.57402	46.9972	22.2813	72.1508	0.0334379	42.02	10.4453	75.7045	3.66584	55.0734	8.08163	17.391	1
130100	2011	115.771	99.2998	56.9934	454.793	3.11041	35.3836	7822	6.90668	48.5286	22.6363	77.32	0.101605	44.04	10.6198	76.1393	3.96748	53.2216	8.21262	19.2253	1
130100	2012	116.287	99.3954	57.9242	350.613	3.16496	30.1731	8993	6.9595	48.1832	22.8524	85.5213	0.177917	45.13	10.7092	75.7373	3.83203	54.5943	8.59523	18.938	1
130100	2013	116.895	99.2225	58.9666	345.29	3.19005	37.7529	9682	6.92919	49.5064	23.1803	93.8268	0.281917	46.29	10.7889	75.3357	3.98213	55.2345	9.60969	20.7945	1
130100	2014	117.988	98.902	59.7293	359.265	3.2165	37.9335	10690.8	6.64567	49.4079	23.7375	91.8175	0.278427	47.59	10.8287	75.3017	4.4589	52.0809	9.3107	21.2722	1
130100	2015	118.851	99.0479	60.7515	363.707	3.20988	33.4192	11441.6	6.68291	49.0493	24.1822	95.9344	0.325783	58.3	10.8758	75.3211	4.38342	55.0632	9.94575	20.9134	1
130100	2016	119.553	99.0312	59.8941	325.233	3.1692	40.054	12345.5	6.72323	50.339	15.3278	94.2391	0.359966	59.96	10.9527	73.8226	4.51807	53.2291	9.91332	22.5814	1
130100	2017	110.356	99.1918	60.8093	356.31	3.45254	43.7595	13345	6.58179	51.0677	15.6895	64.6419	0.434636	61.64	11.0585	84.9151	5.08282	49.2208	9.37072	23.6404	1
130100	2018	110.809	99.2614	60.5094	343.822	2.41417	35.5928	14517.9	6.29983	49.8633	15.6031	81.2965	0.563962	63.16	11.0339	84.8529	4.41795	50.03	8.18876	22.5342	1
130100	2019	109.123	99.3255	60.9448	331.888	2.07238	40.385	15853.5	6.39981	51.1275	15.9182	88.3237	0.675284	64.41	10.9192	84.8755	4.52352	49.0825	9.23446	24.1658	1
130100	2020	110.201	99.524	61.2338	192.129	2.13108	44.151	16947.4	6.54365	52.2924	16.0383	95.7467	0.877015	70.2	10.941	84.5926	5.40394	46.9917	9.02844	25.5416	1
130100	2021	110.161	100.113	56.8882	187.337	2.07974	41.8168	18676	6.56603	52.4405	16.1892	102.532	0.882805	71.09	11.0309	84.6266	4.62199	48.5041	6.79531	25.6325	1
130100	2022	110.123	101.027	51.2334	183.614	1.99483	45.5186	19833.6	6.58671	53.4593	16.3641	122.279	0.951823	71.44	11.118	84.2246	5.32476	51.1576	6.89348	26.4808	1
130100	2023	109.955	100.687	51.2184	181.658	2.00292	42.6945	21241.9	6.60556	53.261	16.3678	126.824	1.09136	72.28	11.1693	83.8855	4.719	51.2795	7.29294	26.6458	1
130200	2008	79.7581	99.0879	50.1577	435.009	8.99297	18.2731	6625	6.20947	43.8811	9.97298	72.8656	0.0662548	33.51	10.796	58.9072	2.30825	49.8151	9.10495	13.8788	1
130200	2009	80.3875	99.072	49.5271	647.158	8.59647	18.1585	7420	6.44024	44.2469	10.5505	72.3042	0.0781764	33.43	10.8581	60.0468	1.9871	48.6853	10.6553	14.3205	1
130200	2010	81.5704	99.1078	50.0648	645.971	8.18374	18.1719	8310	6.47574	44.5873	11.1449	95.2775	0.100447	32.63	11.0154	60.5602	2.12645	56.1026	10.7053	14.8504	1
130200	2011	83.6361	99.0983	54.0264	394.235	8.15508	19.2806	9460	6.49928	45.3518	11.6046	111.816	0.132392	32.41	11.2096	60.8718	2.20792	56.8738	9.28339	16.0087	1
130200	2012	84.3979	99.1171	51.5429	593.196	7.8933	18.9437	10698	6.34786	45.3207	12.0664	121.558	0.205106	53.6	11.2774	61.0626	2.32256	57.9763	9.42761	16.3008	1
130200	2013	85.3755	98.9816	49.0779	645.592	7.69173	19.806	11673.8	6.31876	45.5084	12.5218	124.178	0.247581	54.97	11.325	60.6562	2.57339	55.4108	9.67092	16.7479	1
130200	2014	86.2194	99.0212	48.832	629.619	7.77627	20.6362	12866.8	6.25756	45.8978	12.9336	118.487	0.246802	56.21	11.3224	60.5952	2.32023	51.7861	8.62076	17.468	1
130200	2015	87.2179	99.1919	49.286	619.087	7.84528	22.8378	13935.1	6.23771	46.6025	13.2805	127.381	0.269485	58.31	11.3002	61.2519	2.52248	53.9885	8.40827	18.4688	1
130200	2016	87.5414	99.5206	49.7449	272.439	7.58726	20.8343	15023.1	6.38013	46.9795	8.32546	129.688	0.25063	60.41	11.334	59.3907	2.57386	52.4531	8.74366	18.7549	1
130200	2017	78.5851	99.7145	49.8884	307.151	8.31544	20.6879	16229.2	6.01683	46.8812	8.44839	95.3231	0.314353	61.64	11.3678	66.5179	2.57695	48.085	7.08624	19.0249	1
130200	2018	77.6793	99.6339	50.5887	305.668	7.40214	24.9349	17656	5.88421	47.8205	8.61156	98.517	0.370887	63.14	11.4269	66.5138	2.96202	49.0347	8.32441	20.521	1
130200	2019	78.9471	99.3729	50.9079	185.014	7.55214	25.1939	19316	5.9459	48.2986	8.72618	116.027	0.39297	64.32	11.4201	66.9453	2.72561	47.7255	8.87367	21.4701	1
130200	2020	79.8515	99.4114	51.3321	131.234	7.65351	27.4897	20687.1	5.96255	49.0877	8.8929	135.421	0.555783	64.32	11.469	67.3493	2.80206	46.2888	8.49058	22.6497	1
130200	2021	80.2041	99.7576	51.4713	130.724	7.18345	25.2616	22838.7	6.00152	49.5176	9.02086	144.46	0.576963	65.42	11.6046	67.6945	2.76998	47.588	7.40866	23.3496	1
130200	2022	80.0305	100.209	44.0376	132.829	7.1633	25.0633	24254.7	6.047	49.7324	9.1204	151.664	0.733636	65.79	11.6829	67.8619	3.02524	46.9209	7.17044	23.4388	1
130200	2023	79.5854	100.227	43.9391	132.495	7.26892	25.7918	26049.6	6.11221	50.3815	9.15585	153.031	0.831212	66.71	11.7094	68.0079	2.82812	45.729	6.36714	24.4897	1
130300	2008	60.2054	98.6491	36.8279	132.747	9.83847	17.2536	5068	6.09706	42.2748	8.20587	47.7151	0.0616499	42.01	10.2506	66.3754	1.83094	38.112	8.19953	11.4149	1
130300	2009	61.6376	98.6453	38.2648	308.923	9.59686	17.876	5516	5.82165	42.2469	8.5117	57.1254	0.0701069	43.35	10.2403	65.9386	2.15968	42.9875	20.2518	11.769	1
130300	2010	64.3127	98.9466	39.1907	471.134	9.15515	20.305	6214	5.9016	43.0641	8.59562	67.4929	0.0833516	43.19	10.3821	66.6455	2.20198	43.2296	9.4225	12.7448	1
130300	2011	65.223	99.3102	34.2294	638.473	8.95066	19.8109	7365	6.03509	43.3139	8.70813	70.8115	0.102207	43.43	10.5166	66.4688	2.42652	41.6302	9.78101	12.9056	1
130300	2012	65.4035	99.4234	36.3753	811.605	8.83786	19.6732	8315.15	5.46594	43.0604	8.9578	76.3477	0.163228	43.47	10.5746	66.7915	2.09883	42.2561	8.58707	13.2694	1
130300	2013	65.4309	99.0518	38.6896	991.802	8.7776	22.2838	9006.53	5.7706	43.888	9.91398	89.2335	0.183379	43.33	10.5949	66.5832	2.3292	44.745	9.17967	14.4324	1
130300	2014	66.4872	98.6352	38.5091	782.439	8.76675	21.3389	9963.85	5.78107	43.8771	9.00922	86.3956	0.160155	43.59	10.6131	67.0089	2.50851	43.2476	8.93506	14.7297	1
130300	2015	67.3217	98.774	38.7486	766.745	8.04342	21.4959	10781.9	5.69275	44.1353	8.93515	90.4718	0.225985	54.07	10.6525	67.3676	2.77012	43.1713	9.56973	15.1653	1
130300	2016	65.9839	98.946	39.4673	574.452	9.16967	20.7566	11620.7	5.9193	44.5703	5.57802	99.5949	0.188715	56.13	10.7206	64.1924	2.76871	41.548	8.39276	15.5929	1
130300	2017	60.082	99.5932	39.6472	635.348	9.53832	23.8144	12562.7	5.86568	45.4514	5.35538	99.8345	0.210306	57.88	10.8267	66.6133	2.67271	40.061	8.32338	16.5502	1
130300	2018	61.7924	99.2657	39.9248	583.99	8.23512	24.5783	13718.5	5.65512	45.6134	5.50877	110.312	0.300038	59.42	10.9063	66.3918	2.98115	40.1538	8.75331	17.2177	1
130300	2019	61.575	98.6626	40.466	554.997	8.60105	26.2799	15035	5.73089	46.0694	5.62463	125.364	0.377668	60.72	10.8885	65.2861	2.87375	39.6356	9.16537	18.2578	1
130300	2020	63.2113	98.509	41.1042	357.179	8.60595	22.1466	16088	5.83245	45.8275	5.64511	140.874	0.532351	63.97	10.935	65.4134	2.93304	38.2816	10.7466	18.1267	1
130300	2021	63.614	99.7056	46.8961	260.542	8.28516	23.5464	17793.4	5.86085	47.3455	5.6863	160.28	0.656074	64.95	11.0263	65.7489	2.6919	40.4162	8.85711	19.7758	1
130300	2022	63.3539	100.752	32.1908	255.269	8.29754	23.6978	18878.9	5.89944	47.4168	5.91856	179.123	0.745558	65.47	11.0614	65.971	2.65321	41.5679	9.42078	19.1787	1
130300	2023	63.0333	100.666	38.1157	248.767	7.83552	24.0406	20162.6	6.00558	48.1908	6.02601	188.434	0.901453	66.43	11.1079	65.4238	2.7484	41.6081	7.91843	20.4161	1
130400	2008	116.802	99.6667	58.0156	467.273	7.75543	16.599	4848	5.86705	43.7007	13.8209	45.0452	0.0489886	40.93	9.97329	70.8007	1.96318	49.3345	8.80644	13.8019	1
130400	2009	116.782	99.531	59.673	389.65	7.98849	17.4258	5323	5.93487	44.0583	14.5034	49.2765	0.086682	42.58	9.97003	71.1241	2.02671	52.9778	10.6235	14.3605	1
130400	2010	118.631	99.2693	60.1265	369.391	7.71439	19.4298	6085	6.14914	44.7399	15.0822	64.083	0.0986031	44.42	10.1068	71.7068	2.29323	57.2159	9.70506	15.2832	1
130400	2011	119.223	99.2942	63.7161	329.369	8.0369	20.0081	7366	6.7512	45.9815	15.7067	68.6055	0.0908839	45.38	10.2562	72.6216	2.31392	53.0263	9.69081	16.6225	1
130400	2012	119.344	99.3143	61.3251	372.152	8.41751	18.8017	8447.13	7.22414	46.4367	16.1809	77.4036	0.132554	46.58	10.3239	72.3745	2.07222	56.0717	9.18447	16.9621	1
130400	2013	119.195	99.2846	58.9157	326.968	8.69492	20.8824	9306.6	7.23858	46.8727	16.6024	82.2615	0.149331	47.91	10.3353	72.2612	2.52	55.8442	10.8858	17.5908	1
130400	2014	119.822	99.1884	60.4612	315.33	8.89015	20.7788	10342.9	7.0841	46.9991	17.0278	79.6839	0.158382	49.13	10.3062	72.6167	2.69473	53.5347	13.2874	18.152	1
130400	2015	120.485	99.2891	61.277	312.762	8.85157	19.2393	11247.3	7.0139	47.0089	17.435	81.6904	0.207303	51.38	10.3078	73.1398	2.34284	54.7082	13.1287	18.3611	1
130400	2016	121.531	99.1894	61.301	198.11	9.56162	24.8476	12152.7	6.9933	48.0686	11.2089	85.0372	0.198693	53.53	10.3619	73.871	2.86767	54.268	12.5613	19.8828	1
130400	2017	116.624	99.3108	62.3152	246.752	9.22976	25.1594	13151.5	6.86289	48.3146	11.5858	64.4489	0.230111	55.31	10.3783	81.473	2.815	53.2207	10.6786	20.3841	1
130400	2018	116.278	99.452	64.6637	242.744	6.43074	24.4324	14307	6.5547	48.4789	11.9367	69.1757	0.248871	56.87	10.3937	80.6023	2.51724	53.3295	11.6458	20.8732	1
130400	2019	115.216	99.4769	65.0049	230.169	6.36258	24.3834	15695	6.5905	48.8991	12.232	73.1473	0.284881	58.15	10.3999	79.6915	2.71798	50.8231	11.5372	21.5859	1
130400	2020	115.811	99.4401	65.5285	172.748	6.05793	25.1188	16888	6.86247	49.6545	12.5492	83.8488	0.463824	58.27	10.4423	78.8637	2.70417	50.5912	10.866	22.5022	1
130400	2021	115.693	99.8131	65.5122	168.336	6.05203	24.0373	18796.4	6.8773	50.1561	12.8083	96.1116	0.495473	59.59	10.5658	79.5021	3.14891	52.8995	11.2006	23.2658	1
130400	2022	116.741	100.261	56.5443	153.684	5.55136	25.313	20056.5	6.90975	50.5059	13.0167	113.434	0.675707	66.48	10.6176	79.0667	3.06584	55.3003	10.0206	23.4445	1
130400	2023	115.827	100.296	56.43	153.514	5.41076	24.5418	21560.8	6.94182	50.8229	13.2299	123.427	0.801995	61.44	10.6139	79.3349	3.215	55.5952	9.85026	24.0421	1
130500	2008	99.4269	99.7909	56.5082	367.09	10.5236	17.405	4439.75	5.78304	43.3985	8.6909	46.2401	0.0613671	23.35	9.54691	69.7831	2.14566	59.7717	11.1306	13.2952	1
130500	2009	101.141	99.7792	52.8245	369.71	10.2824	17.3855	4911.86	5.70856	43.2789	9.06408	47.1835	0.0705584	39.88	9.59551	70.4414	1.93688	59.1644	15.7083	13.218	1
130500	2010	102.423	99.6871	53.7277	374.2	10.1006	17.6847	5440.5	5.91108	43.6977	9.39823	50.5613	0.0875011	40.93	9.71462	70.8684	2.25791	62.6367	11.3157	13.7277	1
130500	2011	103.683	99.6423	58.2575	378.879	9.9295	21.5921	6033.15	6.30236	45.0934	9.47562	64.6492	0.0872873	41.84	9.87256	70.3412	2.3682	61.4717	11.8476	15.3409	1
130500	2012	103.879	99.642	57.721	387.436	9.862	21.3035	6698.33	6.3117	45.2085	9.72943	71.5888	0.166796	42.85	9.92771	70.4271	2.53795	62.292	11.7543	15.5824	1
130500	2013	104.069	99.7325	57.128	391.42	10.747	18.1221	7445.82	6.25879	44.818	10.0117	78.4725	0.197942	44.2	9.95383	70.3396	2.41769	62.318	12.6547	15.2853	1
130500	2014	104.553	99.5629	58.1976	401.058	10.07	22.8542	8342.1	6.21771	45.7667	10.3646	80.712	0.208241	45.43	9.96687	70.2035	2.49825	60.9818	15.7595	16.7021	1
130500	2015	105.682	99.461	59.5653	402.656	10.2448	21.6224	9152.17	6.17821	45.7668	10.5434	82.0386	0.269173	47.73	10.0263	71.2742	2.50876	62.8574	16.0359	16.9842	1
130500	2016	106.929	99.2918	61.0094	330.45	9.7771	21.3693	10005.6	6.17345	45.9921	8.53716	78.7854	0.25768	49.83	10.1295	72.0017	2.47571	61.4447	16.062	17.4968	1
130500	2017	104.606	99.294	61.4861	350.865	8.70011	22.1218	10999.1	6.07243	46.3183	8.76487	81.5798	0.302643	51.57	10.1835	79.5022	2.53103	67.2309	14.1669	18.0895	1
130500	2018	102.884	99.4411	61.8359	331.565	8.51943	25.3523	12286.8	5.96237	47.1289	9.23913	94.6784	0.338416	52.91	10.2031	80.025	2.72442	66.2106	12.9449	19.2974	1
130500	2019	102.596	99.5295	62.8386	306.687	8.20495	24.249	13798	6.14146	47.6436	9.5154	99.0329	0.389801	54.23	10.1837	79.6107	2.70079	62.8343	13.33	20.0089	1
130500	2020	102.629	99.7201	63.0458	279.998	7.84552	23.2925	14943	6.35501	48.13	9.80016	108.877	0.529665	54.1	10.2213	78.8737	3.08784	61.4411	13.2798	20.5241	1
130500	2021	101.986	99.9169	63.1524	254.353	7.51912	27.2274	16437.7	6.35426	49.2442	9.93639	124.291	0.556282	54.74	10.3201	80.139	3.207	64.3761	12.8147	22.0199	1
130500	2022	99.7525	100.178	53.4913	257.814	7.44441	24.3789	17457	6.40503	48.7458	10.0147	134.873	0.677724	55.25	10.3659	81.8663	2.96641	64.7105	13.122	21.188	1
130500	2023	97.8199	100.126	54.1453	259.898	6.79896	27.7988	18609	6.13739	49.3315	10.1884	135.81	0.799136	56.32	10.3717	83.3892	3.27431	64.1	16.0735	22.306	1
130600	2008	98.8461	99.4324	51.5227	506.097	4.56036	18.819	5071.47	5.97067	43.8249	9.05793	56.227	0.0569259	27.59	9.53578	75.333	2.15862	58.2074	9.06316	13.5402	1
130600	2009	99.4746	99.4378	55.3315	271.638	4.6997	15.7728	5620.52	6.15871	43.9287	9.45873	62.0358	0.0653656	35.85	9.61412	75.7096	1.86326	62.079	10.3985	13.6521	1
130600	2010	101.513	99.4048	55.5168	271.297	4.43239	17.8231	6232.97	6.36853	44.6522	9.72133	73.1034	0.0751497	30.23	9.77904	75.4994	2.20347	63.6406	10.0771	14.4941	1
130600	2011	102.995	99.5696	56.8786	261.966	4.22401	19.4631	6916.58	6.61116	45.4997	9.98519	77.0111	0.0673649	30.27	9.95736	75.6296	2.18691	60.6942	9.66895	15.4024	1
130600	2012	103.012	99.5811	55.6591	273.169	4.23619	21.8377	7680.08	6.55963	45.9618	10.2414	82.872	0.140925	30.16	10.0525	75.2583	2.25137	60.2866	6.52036	16.1096	1
130600	2013	103.027	99.4626	54.4931	250.081	3.97934	17.9705	8533.38	6.51938	45.4469	10.505	92.1347	0.176645	27.57	10.1248	75.1018	2.28371	61.1081	10.9559	15.6866	1
130600	2014	103.808	99.1059	55.1785	237.17	4.17413	20.6485	9573.14	6.25754	45.7499	10.7605	93.5245	0.200557	37.99	10.1411	75.3202	2.3468	60.1405	10.9889	16.6501	1
130600	2015	104.955	98.8679	56.4017	256.77	3.94302	20.2628	10557.6	6.20742	45.8681	10.9611	95.7383	0.211123	46.67	10.1249	75.5284	2.48242	61.4521	9.97461	17.1595	1
130600	2016	105.696	98.8475	57.3877	255.844	4.06924	20.251	11612.5	6.30557	46.2845	6.56457	96.9316	0.243199	52.82	10.2684	74.7782	2.36604	60.0817	11.4032	17.824	1
130600	2017	97.822	99.2614	57.5718	279.331	4.17319	23.6999	12779	6.1052	47.0436	6.80107	78.7609	0.238181	50.97	10.2672	83.3414	2.9159	57.9626	8.61197	18.8596	1
130600	2018	96.9355	99.6711	57.3858	234.635	2.70808	21.8803	14108	5.96191	47.1895	6.94259	85.3199	0.296184	52.54	10.2995	83.6609	2.85601	54.7612	7.82911	19.0949	1
130600	2019	85.5704	99.6681	51.5394	211.921	2.92696	24.172	15617.8	6.14672	47.7777	6.29102	123.093	0.362717	54.68	10.3432	81.5016	3.03771	53.9355	11.4301	19.6969	1
130600	2020	93.879	99.6638	56.6781	163.535	2.69301	23.4389	16882.9	6.23353	48.4083	7.3116	110.29	0.485915	57.14	10.3932	82.3312	3.12894	52.884	12.1194	20.7955	1
130600	2021	93.0681	100.156	56.1993	157.788	2.78088	23.31	18956.9	6.26407	49.1386	7.43312	128.717	0.528491	58.45	10.5034	82.1679	2.64303	56.1164	10.711	21.7831	1
130600	2022	92.5158	100.659	50.1486	156.438	2.82774	27.5531	20340.8	6.30721	50.1251	7.53233	153.486	0.674151	59.08	10.5467	81.9083	3.03778	58.8693	10.8303	22.8049	1
130600	2023	93.085	100.553	48.2931	153.388	2.84302	23.7993	21662.9	5.9771	49.4051	7.70618	157.479	0.723142	60.34	10.5927	80.937	2.69851	58.9471	12.0051	22.4542	1
130700	2008	46.5784	99.9382	17.3437	178.74	4.3757	17.9357	3286	2.97155	38.38	1.90111	91.5117	0.0123073	32.02	9.6596	66.3803	2.07496	44.5193	9.61041	7.38881	1
130700	2009	47.5583	99.4486	17.886	162.856	4.69014	19.1586	3559	1.78372	37.2166	1.96859	97.2099	0.0135313	43.96	9.75914	67.5558	2.23307	43.6081	11.277	7.24618	1
130700	2010	49.1779	98.9954	17.9166	146.224	4.95375	19.9861	4119	2.90871	38.4878	2.06346	126.24	0.01883	45.17	9.93981	67.3215	2.30525	46.773	10.351	8.22863	1
130700	2011	49.7616	99.1674	20.0125	130.032	6.30148	18.4912	4853.71	3.22881	38.9011	2.14404	139.654	0.0123189	46.42	10.083	69.1216	2.32382	45.1094	9.99847	8.64982	1
130700	2012	50.62	99.3722	19.0596	154.269	9.1166	19.4714	5563.62	2.68661	38.5842	2.21032	168.622	0.0504538	47.63	10.1787	67.835	2.27772	48.6978	11.4817	8.8751	1
130700	2013	51.0211	99.548	18.062	136.879	6.53287	17.0548	6583.42	3.02518	38.9757	2.29336	198.078	0.0886661	48.95	10.2473	66.7511	1.99863	52.7804	12.4506	9.01819	1
130700	2014	51.4124	99.565	18.385	158.914	6.79076	18.2288	7461.79	2.98339	39.3551	2.39179	189.176	0.10428	50.1	10.2677	66.2815	2.26816	50.018	12.6744	9.69343	1
130700	2015	51.6311	99.2645	18.544	161.695	7.05103	21.654	8341.24	3.02548	40.0397	2.501	191.492	0.122594	52.2	10.2776	67.437	2.76379	50.4835	12.2829	10.8096	1
130700	2016	51.6353	99.3518	19.1085	97.7763	6.99052	20.1038	9241.22	3.76092	40.8852	1.80679	202.539	0.134325	54.19	10.3479	67.1085	2.31776	51.2758	15.3234	11.3612	1
130700	2017	53.1673	99.8542	19.0734	95.4684	7.01172	23.1715	10292.6	3.40334	41.4858	1.86345	164.576	0.163423	55.92	10.3316	72.804	2.51626	49.7497	14.4762	12.3366	1
130700	2018	49.552	100.135	19.1711	97.9922	11.7318	24.1377	11531.2	3.792	42.2543	1.92554	141.16	0.182065	57.24	10.4056	71.9227	2.67853	48.3232	22.0427	13.2728	1
130700	2019	48.99	100.13	18.185	83.6877	11.4035	22.2884	12972.6	3.83532	42.3519	2.01552	172.588	0.231176	58.38	10.415	70.5949	2.50507	54.3918	21.1675	13.5734	1
130700	2020	48.2379	100.369	17.0511	69.1992	11.086	22.1389	14166.1	4.12258	43.0003	2.05328	196.959	0.292746	66.1	10.4536	68.5903	2.77963	53.6029	22.0664	14.1778	1
130700	2021	48.3225	100.963	19.8729	66.1523	11.4478	24.8263	15979.5	4.0545	44.197	2.08869	214.818	0.319513	67.12	10.5382	69.1932	3.0877	56.0947	19.8726	15.8115	1
130700	2022	48.4667	102.181	23.8074	52.9317	11.1201	29.1937	17209.8	4.15717	46.032	2.13343	264.672	0.297423	67.48	10.5672	67.5222	3.32268	60.9929	15.6938	17.6625	1
130700	2023	48.199	101.879	23.518	48.9721	12.1341	25.3474	18552.2	4.27176	45.7128	2.15321	262.611	0.329885	68.35	10.6049	68.374	3.1525	60.6233	16.7554	17.6221	1
130800	2008	59.5572	99.4741	26.8339	529.396	6.02151	18.1182	3656	5.36962	41.2098	4.53813	83.7847	0.0325561	26.54	9.87071	76.7435	2.08003	46.5534	12.9925	9.72012	1
130800	2009	63.9827	98.4622	27.5602	501.144	6.19353	17.8375	3926	3.35594	38.7659	5.2579	86.1933	0.0643739	35.76	9.92516	77.2894	2.15071	46.7178	13.6789	8.96228	1
130800	2010	69.8094	98.3002	28.2367	467.882	6.24183	20.5423	4382	3.3619	39.3254	6.01902	106.977	0.0124802	32.34	10.0789	78.8473	2.15826	48.7442	13.0183	9.85487	1
130800	2011	73.4221	97.3821	38.9274	457.429	6.5503	16.5608	4935	3.4995	39.136	6.56968	126.954	0.0522593	32.45	10.2922	78.362	1.92819	49.5056	13.0462	10.3583	1
130800	2012	78.0624	96.7953	31.2591	445.074	6.80805	19.1991	5546.2	3.44612	39.0594	7.18686	149.882	0.118151	32.53	10.3533	76.9407	2.22232	51.6862	14.1122	10.5686	1
130800	2013	80.8663	97.513	22.8709	441.186	7.1783	19.4973	6030.98	3.82207	39.5222	7.82923	173.92	0.199695	32.74	10.4236	76.901	2.38239	53.9351	15.3764	10.4201	1
130800	2014	83.1551	98.6595	24.8553	435.449	7.50798	21.1666	7163.23	3.27828	40.0873	8.34783	186.655	0.291146	32.93	10.4707	76.0553	2.69269	54.855	15.7537	11.2806	1
130800	2015	86.101	98.7561	26.5056	428.023	7.49094	19.7433	7923.27	3.25662	40.182	8.83636	194.75	0.395807	46.8	10.4783	74.9195	2.47038	55.7732	13.3215	11.5695	1
130800	2016	86.9846	99.1437	27.0144	396.972	7.98804	19.3553	8735.91	4.20399	41.5044	5.38276	199.574	0.429283	49	10.5337	72.8337	2.57714	55.3086	15.6565	12.4149	1
130800	2017	80.4506	99.7855	29.8831	424.771	9.03115	21.967	9682.34	4.68853	42.9823	5.55053	188.582	0.453164	50.7	10.5601	75.1144	2.50987	57.1167	15.1575	13.7533	1
130800	2018	82.5276	99.3918	30.8528	379.796	8.66357	24.3914	10804.5	5.07192	43.9835	5.69029	236.822	0.593472	52.07	10.5657	73.7468	2.65237	61.235	20.4612	15.058	1
130800	2019	87.7141	97.0522	32.3168	360.646	8.40121	22.0327	12101	5.15595	43.1855	5.98621	257.133	0.72991	53.26	10.556	72.6251	2.85348	57.2516	17.5758	15.4428	1
130800	2020	92.765	97.3656	33.9189	323.346	8.31561	23.4244	13190.1	5.16085	43.9489	6.33945	295.598	0.945401	55	10.6136	71.3912	3.14233	56.6589	16.9595	16.4794	1
130800	2021	94.3463	99.2684	33.2384	318.51	8.53485	24.0442	14852.1	5.14185	45.2247	6.52786	364.54	1.02777	58	10.7094	71.0358	2.72165	61.2475	17.4995	17.4424	1
130800	2022	92.1665	103.092	19.7402	311.653	8.70221	25.4086	15966	5.22217	46.7361	6.6587	430.38	1.28212	58.07	10.7572	70.5549	3.47527	62.8171	15.8145	17.2528	1
130800	2023	90.7468	102.853	19.3167	308.227	8.62494	24.5489	17115.5	5.21203	46.767	6.68984	448.569	1.3882	59.12	10.7939	69.6711	2.77878	62.2626	13.7695	17.5948	1
130900	2008	81.4134	99.5673	42.0513	547.856	7.61623	18.0881	5179.97	5.17839	42.2444	8.25894	59.9246	0.0534353	30.26	10.0928	75.7725	2.04551	53.4307	9.74496	12.0106	1
130900	2009	81.954	99.5232	38.793	444.597	7.3559	19.6732	5710.32	5.35689	42.6838	8.52729	66.8127	0.0462787	30.25	10.1308	76.5015	2.26633	55.5486	11.6883	12.4	1
130900	2010	85.0576	99.4911	39.3464	464.873	7.62114	17.7479	6297.73	5.38718	42.5833	8.79659	53.7247	0.0724987	31.14	10.3137	77.737	2.07274	62.635	11.1279	12.4403	1
130900	2011	87.2197	99.4759	47.2708	498.02	7.30394	18.2579	6948.61	5.47732	43.327	9.01577	87.7469	0.081048	31.21	10.4683	77.8802	2.18771	54.1709	10.2633	13.5936	1
130900	2012	87.2722	99.3396	41.0988	473.791	7.18311	18.0053	7670.13	5.38433	43.0345	9.20914	96.0635	0.104342	31.14	10.5396	77.9931	2.29957	54.6212	9.2195	13.3518	1
130900	2013	86.8681	99.0511	34.944	476.991	7.37283	22.6639	8470.33	5.38905	43.551	9.53413	102.658	0.13214	31.5	10.5952	78.0092	2.56405	53.6189	11.2977	14.114	1
130900	2014	87.5327	98.8798	37.5317	481.263	6.78634	22.973	9441.91	5.04173	43.5742	9.78729	99.4835	0.142735	31.58	10.6159	78.7341	2.33684	50.7979	11.9272	14.7153	1
130900	2015	86.3633	98.611	39.0858	498.67	6.33647	18.648	10389	4.93912	43.0071	10.1512	99.5957	0.205848	48.56	10.6662	81.7782	2.35161	50.7392	13.2942	14.423	1
130900	2016	87.657	98.2555	40.147	401.146	5.98732	21.9061	11340	5.10156	43.8901	7.95618	92.3243	0.221257	50.56	10.7242	81.3413	2.59604	47.1603	14.2361	15.6918	1
130900	2017	82.7287	98.9103	40.6257	441.741	6.11948	20.0081	12363	4.9478	43.9479	8.29878	75.118	0.252442	52.31	10.7543	88.2948	2.58217	43.7106	12.3035	15.746	1
130900	2018	79.8138	99.7305	41.0722	449.649	3.98351	21.4604	13515.8	4.85482	44.8214	8.33496	82.3498	0.278922	53.64	10.7569	90.7626	2.38949	42.8455	11.7563	16.5657	1
130900	2019	79.9339	99.7243	40.8959	469.403	3.56009	26.4767	14854.1	5.01646	46.1346	8.45501	88.3985	0.319078	54.91	10.7275	91.4709	3.10808	40.783	12.2002	18.248	1
130900	2020	78.965	99.757	41.0289	295.978	3.51188	24.6317	15908.5	5.17687	46.3475	8.60328	97.0823	0.433374	51.14	10.762	91.1412	2.89366	39.7675	13.2978	18.4979	1
130900	2021	79.9828	99.9483	41.4638	281.927	3.32383	25.2655	17547	5.18223	47.002	8.74743	110.346	0.465569	52.29	10.8838	91.5222	2.7138	40.2676	10.7876	19.4983	1
130900	2022	80.2706	100.076	42.2037	273.804	3.08038	23.8514	18617.2	5.22736	47.2116	8.8269	131.432	0.626958	52.84	10.9364	91.4353	2.90519	42.3432	10.2934	19.8566	1
130900	2023	80.1785	100.074	42.5869	269.445	3.03448	25.7958	19864.6	5.17125	47.8064	9.02933	134.885	0.75145	54.14	10.941	91.5586	2.77075	41.5739	10.9064	20.8522	1
131000	2008	81.123	99.0554	45.8835	257.259	13.0905	16.7399	6155	5.79733	42.7298	10.7184	83.5843	0.0573891	29.83	10.1564	61.8288	2.13347	58.1507	7.66547	12.8278	1
131000	2009	81.9325	99.046	45.9227	254.913	12.54	17.409	6834	6.01888	43.2741	10.9966	91.3675	0.0820926	31.09	10.2314	62.7828	2.17161	61.6686	14.0028	13.4151	1
131000	2010	82.8714	98.9069	46.1682	252.553	11.9892	16.1507	7588.65	6.05557	43.2982	11.2448	147.689	0.090477	29.36	10.3811	64.0042	2.00787	55.4913	10.4166	13.6042	1
131000	2011	84.1905	98.8792	53.1833	249.166	11.3918	19.7184	9102	6.08667	44.6538	11.4403	108.815	0.0985751	30.09	10.5434	63.7937	2.19209	57.9439	8.39716	15.6509	1
131000	2012	84.8687	98.654	46.6613	248.288	10.9086	19.8378	10447	5.89643	44.4422	11.7007	129.415	0.149794	31.34	10.6315	63.1595	2.19868	61.3074	9.0332	15.7249	1
131000	2013	83.7074	98.2254	40.1257	253.949	10.6959	18.6318	10984.6	5.86432	43.865	12.0027	133.738	0.198573	39.53	10.7364	62.4355	2.08096	61.8158	13.7634	15.1806	1
131000	2014	84.6225	98.3566	40.6014	253.054	10.1898	19.4881	12115.4	5.54729	44.0707	12.3062	133.016	0.185421	33.23	10.7854	64.0751	2.40802	60.2361	12.3916	15.8179	1
131000	2015	84.4135	98.3825	41.4903	255.461	9.80509	21.2051	13159.4	5.205	44.3252	12.576	135.482	0.22503	55	10.8902	65.8251	2.59426	60.582	11.6396	16.5749	1
131000	2016	82.8384	98.0421	41.735	263.033	9.59041	23.8525	14286.2	5.30992	45.0148	7.216	138.378	0.343376	55.78	10.9609	66.5566	2.58216	62.9644	12.8876	17.6731	1
131000	2017	78.894	98.637	42.3192	277.356	9.56965	24.7843	15487	5.12035	45.5263	7.32037	127.022	0.225175	58.5	11.015	72.5486	2.86991	70.8066	8.75356	18.3589	1
131000	2018	74.9648	99.5527	42.543	270.849	9.0315	22.3837	16865	5.08139	45.8633	7.35344	151.007	0.286206	60.01	11.0804	72.3618	2.57176	70.6952	9.74671	18.5533	1
131000	2019	72.4826	99.7151	42.6645	278.749	8.8343	23.006	18467	5.27724	46.6515	7.32495	164.131	0.425108	61.29	11.1	72.4305	2.76919	68.8601	9.73639	19.537	1
131000	2020	70.5286	99.7955	42.752	76.8414	8.72602	23.3042	19723.2	5.50699	47.348	7.39107	184.156	0.603522	64.84	11.121	71.6486	2.7277	68.9754	8.62222	20.3072	1
131000	2021	70.124	99.9393	42.6425	72.0618	8.87983	26.666	21735	5.57673	48.5239	7.48016	190.934	0.458895	65.89	11.1834	72.465	2.94198	70.6116	8.21121	21.9705	1
131000	2022	69.9143	100.112	37.3516	72.5422	8.86725	26.0237	23039.3	5.61496	48.6195	7.54018	206.356	0.52509	66.01	11.1827	73.2325	3.43398	71.1291	7.15982	22.0845	1
131000	2023	69.4652	100.133	37.3021	69.3148	8.22669	27.2257	24605.8	5.18843	48.8057	7.62433	185.696	0.596281	66.8	11.1839	73.4921	3.00373	67.9178	9.31786	22.8845	1
131100	2008	95.1117	99.7861	54.7059	338.635	11.7436	14.4674	3638	5.94315	42.7286	9.26125	48.2778	0.038031	22.68	9.59249	67.6886	1.86564	59.5281	10.7418	12.1912	1
131100	2009	96.2014	99.7633	54.5313	374.024	12.0378	16.7612	3918	5.97364	43.1618	9.9264	53.1231	0.0347795	37.67	9.61229	68.4606	2.12922	60.2614	13.1558	12.7827	1
131100	2010	97.5987	99.6905	54.8418	262.946	11.9223	19.7112	4369.72	6.07846	43.8798	10.3411	67.2885	0.05368	39.23	9.78474	69.8625	2.35825	63.8405	12.5443	13.6642	1
131100	2011	98.4836	99.626	55.088	257.006	11.952	19.1917	5355	6.35955	44.3421	10.5129	73.1572	0.0596546	40.33	9.95412	69.6596	1.94741	62.0459	12.0977	14.224	1
131100	2012	98.776	99.473	55.2606	324.156	12.2835	18.8585	6167.5	6.37238	44.4314	10.8773	76.8696	0.0907494	41.39	10.0368	69.7334	2.56062	61.0688	10.8627	14.5876	1
131100	2013	98.764	99.2428	55.562	351.447	12.127	22.0513	7182.14	6.32747	45.0715	11.1303	89.7467	0.123833	42.91	10.0823	69.5366	2.44685	61.5954	13.4847	15.6965	1
131100	2014	99.3787	99.1665	56.6657	351.985	12.2208	21.9375	8104.17	6.15873	45.1399	11.3183	87.076	0.145672	44.14	10.1421	70.0237	2.78431	60.1596	23.8967	16.1559	1
131100	2015	96.6393	99.1527	57.0372	368.697	11.9068	21.8322	9029.82	6.11498	45.3252	11.6148	79.6311	0.212932	46.64	10.2027	70.7286	2.67857	58.274	20.8111	16.5624	1
131100	2016	96.4427	99.1268	57.6163	366.367	11.321	23.481	10069.1	6.20271	45.9922	8.91759	85.6448	0.278255	48.89	10.3486	72.6196	2.58421	58.1013	16.8033	17.4796	1
131100	2017	108.194	99.3643	57.7692	336.937	9.64086	19.2789	11194	5.96808	45.6457	9.55785	78.9772	0.287472	50.6	10.4208	80.0691	2.63132	62.258	16.4977	17.3555	1
131100	2018	105.101	99.7224	57.8538	334.211	8.46738	21.7182	12493	5.82309	46.4057	9.98075	70.4458	0.351578	52.06	10.4394	81.7357	2.79288	62.1566	15.0215	18.3643	1
131100	2019	104.27	99.8079	58.0862	323.781	8.19821	26.6389	13917	5.97552	47.7691	10.1508	75.6586	0.419496	53.22	10.4	82.6731	3.00456	59.3571	14.7755	20.0873	1
131100	2020	105.08	99.7974	58.4105	292.244	7.7885	21.9129	15100.1	6.07373	47.4821	10.5063	85.3152	0.562628	54.74	10.4348	82.9831	2.57532	58.2666	16.3354	19.871	1
131100	2021	105.347	99.8922	58.4735	262.169	7.70224	25.2988	16912.2	6.09577	48.5686	10.8172	92.4285	0.603174	55.81	10.5214	83.4425	2.8308	60.961	15.1316	21.4411	1
131100	2022	104.322	100.004	59.4565	262.067	7.35152	24.2751	18146.7	6.14695	48.8886	11.0307	104.932	0.860826	56.34	10.5752	84.3515	2.84895	61.4474	13.8012	21.9557	1
131100	2023	103.845	100.017	59.4466	259.922	7.07177	25.8298	19416.9	6.04498	49.3746	11.3064	104.201	0.884267	57.42	10.62	84.7759	2.89022	60.379	15.8159	22.8291	1
140100	2008	71.2653	99.3757	30.8048	133.552	16.4175	11.4071	6419.93	3.59232	38.8676	7.15396	84.0121	0.0328216	82	10.6153	73.6196	1.46467	57.6117	4.55961	9.51315	2
140100	2009	71.9571	98.5507	30.3675	138.672	16.0577	10.2851	6904.03	3.72649	38.6129	7.46147	107.738	0.00293677	82.22	10.653	74.2261	1.24283	60.0384	4.54401	9.55883	2
140100	2010	71.9441	98.6198	31.198	137.956	15.5676	11.9306	7702.92	3.79311	39.2425	7.62164	123.777	0.0119748	82.54	10.7923	74.6644	1.45817	60.0738	4.64548	10.3716	2
140100	2011	70.6054	98.7463	29.0403	149.869	17.7754	12.9802	8995.09	3.8431	39.6355	7.90207	133.072	0.0472884	83.35	10.9506	74.7333	1.44064	60.063	4.69499	11.0415	2
140100	2012	70.8384	97.9047	31.5493	154.693	18.7621	11.4368	10200.7	3.90716	39.5024	8.41494	135.299	0.0732698	83.76	11.0539	75.6483	1.5373	59.9617	6.56266	11.5688	2
140100	2013	71.7628	97.8809	34.1606	158.257	20.6102	11.4176	11424.8	4.07281	40.0322	8.94562	145.562	0.0847655	84.12	11.0922	75.09	1.36394	60.0819	5.50505	12.4838	2
140100	2014	69.6084	98.0548	34.3194	172.478	23.6663	11.0907	12616.4	4.45313	40.6165	9.41637	150.685	0.108434	84.25	11.1341	74.6733	1.39398	59.2822	3.69893	13.1757	2
140100	2015	62.6745	98.436	34.3374	198.776	25.7331	13.7395	13625.7	3.9609	40.7971	9.71272	143.625	0.106481	84.4	11.2179	83.6419	1.63933	57.9831	3.69474	13.8439	2
140100	2016	69.5556	97.8561	34.551	181.653	23.8168	13.7824	14591.2	4.26047	41.2748	3.95064	148.118	0.124834	84.55	11.2883	74.8424	1.83902	57.06	4.96035	14.5948	2
140100	2017	61.7026	97.4932	34.8868	202.365	27.1623	13.7269	15595.3	4.49889	41.4373	3.17497	154.852	0.19472	84.7	11.4258	84.0711	1.64798	56.8019	4.86129	15.0808	2
140100	2018	61.1588	98.119	34.9924	185.764	28.9361	11.5949	16860.4	4.43119	41.5493	3.42416	180.516	0.241064	84.87	11.5428	79.9229	1.48118	59.3499	5.09441	15.2938	2
140100	2019	61.3463	98.5106	35.4086	160.097	27.122	16.2032	18377.4	3.56382	42.0358	3.69354	126.624	0.247792	85.25	11.561	77.1531	1.92532	52.0999	5.1881	16.567	2
140100	2020	62.7594	98.5994	33.9508	137.786	26.2388	16.0237	19655	3.86349	42.6778	3.9036	151.44	0.366287	89.06	11.5771	77.1907	2.19066	51.4155	5.04475	17.2198	2
140100	2021	61.4427	99.8831	32.6844	127.577	25.3232	17.6266	21551	3.92821	44.0048	4.0254	178.659	0.301026	89.23	11.7728	79.3076	2.1641	52.5732	5.02786	18.4117	2
140100	2022	60.8746	101.824	31.5512	116.47	23.5465	16.3842	22822.4	4.02405	45.078	4.03647	181.04	0.492172	89.34	11.8442	78.8983	1.87984	48.8291	4.04045	18.8097	2
140100	2023	60.977	101.739	31.1816	104.484	21.5792	17.9966	24487.8	4.05979	45.8452	4.10254	185.408	0.49364	89.34	11.8327	77.6372	2.20952	51.7594	4.01145	19.935	2
140200	2008	49.5988	100.007	18.928	114.548	9.92162	10.8277	3388.66	2.29573	36.4697	2.29905	29.1903	0.0149227	51.14	9.81232	83.75	1.26679	42.6909	7.41261	5.95664	2
140200	2009	47.8239	99.7646	18.9376	119.778	9.98385	11.2827	3629.38	1.70771	35.872	2.40524	27.1559	0.0100568	51.95	9.84654	83.7626	1.35965	36.2686	8.11777	5.8509	2
140200	2010	49.5523	99.3539	19.9481	117.03	10.0693	12.0828	4111.97	2.45928	36.7978	2.57144	37.4297	0.0186908	54.91	9.99505	85.9271	1.4093	49.143	9.2186	6.69779	2
140200	2011	49.7323	99.0874	20.3791	118.362	9.47867	13.9111	4995.99	2.89229	37.7085	2.6999	43.8331	0.0460987	56.49	10.1831	86.1219	1.62143	46.9027	8.33293	7.72101	2
140200	2012	50.9121	99.1367	21.2136	117.298	10.2671	11.1058	5710.44	3.16262	37.7713	2.87042	45.6622	0.07231	57.95	10.2806	86.2935	1.47628	47.8443	8.4264	7.7637	2
140200	2013	51.1706	98.8577	22.1234	117.894	10.3958	13.1876	6441.38	3.36199	38.4228	3.05174	51.8919	0.0743165	59.03	10.2634	86.2148	1.37512	50.7163	8.52782	8.68846	2
140200	2014	52.3041	98.9837	23.2203	114.928	10.5642	11.2656	7137.05	3.34043	38.3867	3.21234	54.9715	0.0846103	60.04	10.2932	86.7924	1.31949	49.5187	8.98155	8.77527	2
140200	2015	52.6018	98.8828	24.9386	112.139	10.1454	15.5439	7708.01	3.42958	39.3654	3.31678	53.9867	0.0848248	61.02	10.4137	88.5287	1.85027	46.854	9.62851	10.0567	2
140200	2016	53.1441	98.9669	25.5207	109.739	10.212	12.0401	8216.74	3.5092	39.0958	1.84054	56.4914	0.0930827	62.01	10.3815	88.5945	1.38953	46.7588	11.8263	9.74463	2
140200	2017	54.7858	98.9397	25.8699	105.149	9.75331	12.9845	8861.99	3.60515	39.5522	1.65877	61.9762	0.114352	62.94	10.4705	85.8996	1.60215	46.1277	12.2333	10.3473	2
140200	2018	57.158	98.8814	26.1626	98.4121	9.25436	11.997	9710.12	3.90214	39.9601	1.76337	63.3797	0.128924	63.97	10.5966	83.2019	1.41123	47.1336	17.3179	10.787	2
140200	2019	58.1765	98.752	26.5461	92.8109	9.11439	13.5156	10725.3	4.34487	40.9082	1.9181	64.8614	0.209066	65.62	10.6329	85.8896	1.80175	44.5959	15.574	11.8355	2
140200	2020	56.5863	99.4994	26.7434	94.0035	9.4118	14.0141	11610	4.44117	41.6171	2.04266	75.2482	0.328859	72.69	10.674	87.1541	1.5716	42.2296	14.5991	12.4275	2
140200	2021	57.8197	100.697	26.5353	90.8279	9.12797	12.4079	12909	4.47671	42.2538	2.12585	88.2008	0.445116	73.38	10.8847	85.2823	1.69536	43.6817	10.4147	12.8269	2
140200	2022	57.254	102.239	34.3483	88.0232	9.31462	15.2681	13863.9	4.53088	44.0213	2.20129	89.0674	0.404712	73.71	10.9737	84.5188	1.75193	42.75	10.4352	14.5481	2
140200	2023	56.6673	101.986	24.8417	87.2925	9.2741	12.6683	15222.5	4.59898	43.472	2.34165	95.7234	0.461173	74.4	10.9859	84.0319	1.73094	44.9762	11.9544	13.9674	2
140300	2008	73.2805	100.084	9.91519	76.028	5.63691	10.9214	5427	3.93812	38.6915	15.6125	40.496	0.0198304	58.48	10.0866	89.7849	1.19061	56.0222	5.34337	7.42833	2
140300	2009	75.4891	98.4659	11.6035	72.1505	6.35403	11.1753	5801	3.79482	38.0685	16.1612	44.6342	0.0201393	59.11	10.195	88.6926	1.39724	56.1896	5.74907	7.72695	2
140300	2010	81.4578	96.4385	12.0596	66.6397	5.30599	10.1911	6571.79	3.27462	36.834	16.8054	49.8489	0.0195001	60.01	10.3992	89.6435	1.19346	56.6198	6.30974	7.76449	2
140300	2011	85.4789	95.4414	11.7807	64.5567	5.51476	13.1594	7691.06	4.23446	38.1878	18.2588	63.0972	0.150266	61.61	10.6014	95.4399	1.48274	55.1654	6.97321	9.35416	2
140300	2012	89.1577	95.2237	12.5542	61.6692	4.64243	15.2355	8698.75	4.60664	39.1793	19.8471	77.7375	0.254736	63.04	10.727	97.6276	1.67211	59.9794	6.62836	10.5464	2
140300	2013	93.8285	95.5248	13.3335	57.7997	5.24618	15.0726	9760	4.71277	39.7102	21.2754	78.3935	0.298212	64.01	10.7387	95.7555	1.79704	57.7254	6.61612	11.2472	2
140300	2014	96.1688	96.6521	14.6689	48.5981	5.2444	12.7575	10741.9	4.57394	40.0106	22.4945	81.3182	0.30096	64.96	10.7427	97.347	1.38168	55.7209	6.31706	11.4156	2
140300	2015	97.08	98.1243	14.9493	48.3148	4.75811	11.1043	11493.8	4.10753	40.1148	23.093	61.3282	0.274295	65.86	10.7161	96.5465	1.36971	49.3307	7.52655	11.3393	2
140300	2016	97.1826	98.9403	15.2283	46.4328	4.97869	15.02	12171.9	4.18401	41.3336	7.15163	65.8556	0.254314	66.68	10.7543	93.9836	1.8157	51.017	7.30176	12.5028	2
140300	2017	98.165	98.0445	15.532	44.7259	4.10993	15.9139	12963.1	4.2819	41.4715	5.72563	62.696	0.325358	67.56	10.8378	92.6057	1.66596	51.3068	6.43999	13.1311	2
140300	2018	101.237	96.021	16.1756	44.3299	3.65337	13.5222	14077.7	4.35874	40.6959	6.14564	63.9571	0.346054	68.49	10.9256	95.8318	1.59205	51.1546	7.65726	13.3208	2
140300	2019	104.526	95.2668	16.9793	43.2865	5.07284	14.6704	15389.9	3.89869	40.4196	6.58193	60.1121	0.51184	69.48	10.9054	96.523	1.67685	43.8379	6.5399	14.0779	2
140300	2020	111.039	96.9133	17.5201	40.9203	4.79634	14.2909	16510	4.21533	41.7537	7.11066	69.0771	0.608027	70.5	10.9407	96.394	1.7952	44.0406	6.68121	14.9155	2
140300	2021	113.837	98.0398	17.8704	39.0599	4.63627	13.2052	18030	4.23679	42.5169	7.50875	77.4167	0.685131	71.93	11.1563	96.0798	1.63064	30.914	6.05989	15.5877	2
140300	2022	114.55	99.9863	17.3349	38.534	4.65562	14.667	19057.3	4.30127	43.8737	7.70935	87.9236	0.63342	72.29	11.2558	95.8428	1.71416	43.9677	7.36395	16.4305	2
140300	2023	114.287	101.206	12.8757	37.877	4.59841	13.4824	20466.8	4.30144	44.3511	7.92937	94.6086	0.76152	73.01	11.2473	95.435	1.66486	43.2696	7.91872	16.5734	2
140400	2008	43.2796	98.9833	10.6672	92.3999	20.974	10.5736	4991.36	5.53619	38.8834	2.2622	34.86	0.00469023	40.45	9.94438	90.5492	1.34318	63.2906	10.2317	7.40883	2
140400	2009	43.2626	99.0854	11.3266	92.2909	19.2521	10.6073	5396.4	4.49558	38.0566	2.46146	31.2513	0.00381141	41.04	10.0656	91.1477	1.2145	62.2344	10.5189	7.18697	2
140400	2010	43.623	98.691	11.7245	91.7388	17.413	10.3003	6031.98	5.59926	39.2727	2.74379	40.0838	0.00367509	41.84	10.2312	91.1982	1.19474	65.91	11.2832	7.99455	2
140400	2011	44.503	98.7506	12.8348	90.0666	15.3656	14.0092	7177.18	5.77793	40.5212	2.93337	46.1844	0.0521338	43.43	10.5038	91.0704	1.63365	65.1428	11.9126	9.46283	2
140400	2012	44.51	98.9285	13.2942	90.0212	13.5901	12.7487	8218.06	6.26333	41.2821	3.16449	49.0449	0.0715877	45.31	10.5848	90.9236	1.46421	63.7405	10.8042	10.017	2
140400	2013	44.3131	99.2104	13.7229	90.1216	11.7954	14.5857	9228.88	6.42485	42.2239	3.35451	48.1576	0.0767366	46.87	10.5812	90.7579	1.56872	62.8923	10.5661	10.9874	2
140400	2014	44.1579	99.5801	14.1542	89.7926	9.90796	14.6364	10311	6.54578	42.9025	3.50252	52.3507	0.0924206	48.46	10.5775	90.5365	1.59053	63.5549	11.6958	11.6395	2
140400	2015	44.0373	99.6657	14.5762	89.3072	7.9775	13.559	11094.6	6.37392	42.9016	3.5942	50.195	0.0923906	50.02	10.4769	90.5485	1.47869	61.3015	13.3174	11.7833	2
140400	2016	44.3976	99.7063	14.9949	91.9273	7.77004	12.2391	11862.8	6.6589	43.2427	2.01878	53.5407	0.0957477	51.53	10.5315	88.8136	1.55842	61.1922	13.9325	12.0933	2
140400	2017	45.2159	99.587	15.4344	89.3247	7.66747	16.0914	12705	6.81931	44.2195	1.73926	56.6357	0.115856	52.93	10.6854	86.2442	1.9177	61.536	12.6514	13.3659	2
140400	2018	42.4065	99.3586	15.9137	92.2503	7.99756	17.4589	13818.1	6.37335	44.1534	1.88917	60.8536	0.121954	53.96	10.7902	91.2178	2.0316	59.1472	13.5392	13.9573	2
140400	2019	46.851	99.4166	16.0401	79.6629	7.53144	14.0973	15150.9	4.249	41.8304	2.0089	44.9355	0.158899	54.88	10.7838	89.017	1.57322	52.819	12.2395	13.0767	2
140400	2020	48.5146	99.0002	16.2021	75.6653	7.29269	15.3408	16327	4.76381	42.7307	2.15862	58.8862	0.252401	56.47	10.8283	87.4507	1.82766	50.9008	12.1895	14.1723	2
140400	2021	50.4502	99.3788	16.3034	72.5208	7.00599	13.6011	18081.3	4.79095	43.135	2.24687	70.5861	0.304208	57.39	11.1298	84.7616	1.58252	52.0764	9.45004	14.7848	2
140400	2022	51.0947	100.311	14.2893	68.0661	6.82904	17.1001	19437.4	4.8541	44.4117	2.34106	75.5272	0.320021	57.96	11.3235	83.7295	1.86839	52.9767	8.97504	16.026	2
140400	2023	50.8866	100.521	14.8309	64.6764	6.75442	13.8866	21225.7	4.86242	44.5008	2.4497	81.4146	0.340092	59.12	11.3236	84.1824	1.61573	54.0153	10.534	16.3629	2
140500	2008	61.5829	99.6933	12.3298	95.5596	5.59008	9.27246	4905.16	4.1076	38.3495	6.07644	28.751	0.0207552	45.23	10.0778	94.334	1.04574	50.1042	10.6489	6.92533	2
140500	2009	59.9174	99.4361	12.43	97.9332	6.42144	11.5168	5313.13	3.20407	37.7108	6.42065	28.3559	0.0220225	47.03	10.2396	94.7796	1.31365	46.4505	11.3872	7.10204	2
140500	2010	62.3822	99.1184	12.8335	94.0868	6.84605	9.65691	5970.24	3.83988	38.1418	6.87484	37.9732	0.00647017	51.04	10.4278	94.7798	1.21424	51.6042	12.2113	7.44303	2
140500	2011	63.4798	98.8479	12.0896	92.7289	7.42592	12.7829	7128.55	4.10096	39.0429	7.22495	39.631	0.065178	52.75	10.6249	94.8103	1.39524	45.2206	11.7894	8.68601	2
140500	2012	63.6189	97.7091	13.2401	93.8697	8.21639	14.3348	8134.06	4.38934	39.3985	7.58921	46.281	0.0895208	54.48	10.7454	94.6357	1.69798	48.3661	12.8094	9.68301	2
140500	2013	64.8535	97.2876	14.5005	93.0208	8.20245	14.5862	9134.55	4.21813	39.4151	7.95365	47.8801	0.116832	55.52	10.7591	94.3206	1.58356	46.7893	11.8424	10.2635	2
140500	2014	61.9834	97.4671	15.0893	96.981	8.9145	11.9277	10087.3	3.56839	38.6177	8.27739	47.8936	0.127199	56.49	10.7647	93.5484	1.45792	44.6705	11.864	9.93584	2
140500	2015	62.6574	98.4296	16.1517	94.1426	8.51725	14.7529	10914.4	4.87931	41.1293	8.48043	60.6411	0.119952	57.42	10.7665	94.0185	1.86688	48.556	8.94469	11.6262	2
140500	2016	61.0511	98.9711	16.413	95.5259	8.88944	13.6774	11634.8	4.59058	41.0577	3.75262	51.5239	0.125954	58.34	10.7726	94.0214	1.46358	40.757	12.6788	11.6564	2
140500	2017	59.6376	99.9209	16.6075	96.5947	8.95983	13.7883	12510.8	4.3954	41.4935	2.00477	60.2282	0.173093	59.04	10.861	93.76	1.58594	44.5051	12.3478	12.0422	2
140500	2018	59.8183	100.768	16.4809	94.0355	8.8428	15.2149	13566.2	4.35924	42.3112	2.03371	61.314	0.204219	59.88	11.0214	92.804	1.57527	47.954	11.3368	12.8394	2
140500	2019	57.8946	101.245	16.1852	93.2628	9.15877	13.1294	14808.8	3.92968	42.0173	2.05693	65.2375	0.272376	60.79	11.0192	91.6536	1.66101	46.4473	12.0703	12.8204	2
140500	2020	58.4174	101.058	16.0745	91.057	9.11679	17.9339	16054.2	4.13778	43.2398	2.10839	72.2847	0.366284	62.72	11.0703	91.1726	2.13184	41.2325	10.9858	14.445	2
140500	2021	59.1161	101.402	15.8523	88.8361	8.9278	15.3343	17744.1	4.17159	43.4562	2.13012	89.8642	0.393834	63.55	11.3636	89.0323	2.0385	46.357	9.28355	14.8171	2
140500	2022	57.6387	102.717	6.19521	87.4356	9.25244	17.4282	19003.9	4.23482	44.2384	2.16833	100.009	0.415458	64.03	11.5505	89.2699	2.0194	48.9273	8.93373	15.089	2
140500	2023	56.7251	102.212	24.4852	87.2036	9.26465	15.6562	20790.2	4.24718	45.1117	2.1805	101.45	0.525238	65.04	11.5609	89.0691	2.08129	47.4844	8.07081	17.1299	2
140600	2008	53.6636	99.1169	20.0888	106.777	6.15114	11.7278	4780.23	3.04107	37.6417	3.0435	37.9436	0.0213403	44.89	10.207	77.1985	1.41502	50.9711	11.9937	7.31552	2
140600	2009	53.9018	99.2801	20.2378	107.234	6.98316	9.10091	5180.91	2.76742	37.0859	3.22509	43.0099	0.00530741	45.24	10.482	80.2597	1.18955	48.4412	10.4922	6.91024	2
140600	2010	55.3767	99.3462	20.1089	105.219	7.64022	12.7478	5973.99	3.37514	38.5059	3.44137	52.7419	0.00402345	46.28	10.6485	80.1506	1.58797	52.4628	11.2169	8.29841	2
140600	2011	56.8761	99.1309	18.7712	103.495	8.28812	12.4521	7108.44	3.60007	38.8187	3.61309	63.2277	0.0206473	47.87	10.8107	79.8814	1.51621	52.8999	10.5032	8.82409	2
140600	2012	57.1705	98.7133	21.1007	104.458	9.14314	11.8168	8096.61	3.98697	39.2854	3.80662	73.5343	0.0340703	50.02	10.969	80.0914	1.42731	54.2421	10.996	9.56441	2
140600	2013	60.0758	98.0606	23.6441	100.419	8.85477	11.4414	9149.17	4.30137	39.7158	4.05372	79.0171	0.0641122	51.09	10.9828	79.2058	1.40884	54.237	12.9533	10.4081	2
140600	2014	61.1938	98.7815	24.5959	98.2323	9.02952	13.6534	10137.3	4.64324	41.0279	4.2513	78.5041	0.0606936	52.15	10.9544	79.4088	1.46855	52.8738	13.9091	11.5988	2
140600	2015	58.512	98.8219	25.5571	100.812	9.12068	12.4213	10816.5	4.10192	40.4865	3.67327	58.3394	0.0594745	53.16	10.9294	81.6606	1.27584	43.7188	16.922	11.4858	2
140600	2016	59.1142	98.8818	26.5216	98.6558	9.1807	15.389	11477.8	4.78988	41.9212	2.6009	66.2733	0.0825692	54.21	10.9389	80.8617	1.76119	43.9447	14.0743	12.7929	2
140600	2017	60.7343	99.0923	27.4463	94.8504	8.79803	14.6609	12304.8	4.22826	41.5963	2.27775	77.3081	0.129381	55.29	10.9983	80.3302	1.53719	46.5553	0.469371	12.9144	2
140600	2018	61.8709	99.1919	28.3572	90.9158	8.54943	16.9887	13422.6	4.57166	42.7207	2.40342	75.5003	0.152403	56.31	11.0879	79.658	1.90815	46.4824	14.1551	14.1726	2
140600	2019	63.2316	98.9268	28.6648	85.3909	8.38572	16.107	14717.2	4.51615	42.7854	2.57138	73.1069	0.171574	57.51	11.0784	81.7856	1.79925	49.2296	29.8377	14.6681	2
140600	2020	62.303	99.3899	28.8426	85.3781	8.54821	15.9752	15812	4.55292	43.2789	2.77108	96.3669	0.246333	62.53	11.1197	81.6953	1.72233	50.1709	16.035	15.2197	2
140600	2021	61.7477	99.9841	28.8472	85.05	8.5473	17.0294	17371.9	4.58049	44.1275	2.88491	107.432	0.400466	62.74	11.3819	82.9949	1.94174	48.4741	13.0059	16.2198	2
140600	2022	61.7668	100.923	30.6016	81.5919	8.63406	17.0176	18448.9	4.60259	44.9054	2.97019	115.57	0.411348	63.23	11.4597	82.4235	2.13439	48.4019	14.1029	16.9375	2
140600	2023	62.1824	100.907	30.3247	79.5503	8.45156	17.3868	20054	4.6731	45.4496	3.16373	111.96	0.47249	64.26	11.4579	81.2875	1.9825	46.916	11.9003	17.827	2
140700	2008	61.0803	99.1207	24.9968	100.829	9.90185	9.59567	4825.63	4.7148	39.1914	5.18463	45.2172	0.014815	42.67	9.79038	84.4148	1.153	58.8958	9.53554	8.2479	2
140700	2009	62.223	99.168	25.8175	100.669	10.1323	10.3476	5251.73	4.7784	39.5446	5.56747	52.6811	0.0125872	43.48	9.89849	85.497	1.28552	55.7874	10.1601	8.72126	2
140700	2010	61.8185	99.4356	26.0768	113.956	10.9261	11.4049	5878.89	5.21384	40.4142	5.93414	63.2541	0.00256869	44.12	10.0774	86.2998	1.40629	60.145	11.6735	9.46094	2
140700	2011	61.108	99.563	25.0034	125.511	12.0281	12.1167	6995.97	5.5821	41.149	6.19981	69.5744	0.0322774	45.74	10.2232	86.1525	1.22446	59.1846	11.8037	10.2296	2
140700	2012	60.5472	99.0286	27.0761	130.854	12.2524	12.8857	8031.84	6.10217	41.9494	6.55853	75.2983	0.0682806	47.41	10.3207	85.9863	1.46078	59.6421	10.669	11.2838	2
140700	2013	60.6626	99.5286	29.0404	125.811	12.557	14.8281	9100.08	6.68006	43.4329	6.84411	88.7928	0.0729353	48.87	10.3395	84.7608	1.79084	61.7385	11.503	12.6347	2
140700	2014	58.9224	100.346	29.5109	131.027	14.3421	12.5366	10099.7	7.23402	44.186	7.0318	108.389	0.11369	50.45	10.358	84.6164	1.42521	63.8772	9.83824	12.9918	2
140700	2015	57.4372	100.315	29.987	131.163	14.8394	13.9469	10877.4	6.69733	44.0273	7.13189	106.893	0.106935	51.72	10.3651	85.4895	1.44469	61.6159	11.427	13.4085	2
140700	2016	56.7919	99.5813	30.6842	131.226	14.5286	13.1041	11524.8	7.18209	44.3106	3.63486	112.952	0.113903	52.93	10.4002	84.9421	1.73284	62.1588	13.5734	13.8268	2
140700	2017	53.4077	98.6683	31.6771	140.261	15.4973	12.4469	12297	6.98155	43.7991	3.06823	118.237	0.146267	54.14	10.5637	89.9073	1.57061	62.1569	14.9722	13.9929	2
140700	2018	54.3892	99.102	32.5482	140.398	14.861	13.3513	13394.2	6.19232	43.66	3.21427	99.8705	0.18035	55.37	10.6769	87.9897	1.53608	58.9939	14.3074	14.4428	2
140700	2019	53.9893	100.032	32.359	130.655	15.3148	13.5982	14720.2	5.82041	44.0151	3.37965	100.448	0.235125	56.84	10.6824	88.883	1.61995	55.7047	13.8656	14.9811	2
140700	2020	54.7068	100.574	32.2031	127.393	14.2284	16.0852	15767	5.98713	45.1284	3.55133	110.337	0.2715	60	10.6885	87.6846	1.85688	49.7377	13.862	16.0689	2
140700	2021	54.6384	100.59	31.6914	124.095	13.6657	17.1464	17288.3	5.93138	45.6438	3.69388	121.597	0.350061	60.91	10.9159	87.4044	2.16203	49.6344	11.3501	16.962	2
140700	2022	54.1349	101.873	32.9051	120.343	13.0779	15.091	18308.3	6.08827	46.3714	3.7941	128.087	0.390791	61.43	11.0486	86.96	1.95413	50.5959	10.6991	17.2843	2
140700	2023	53.7108	101.414	29.3334	117.015	12.5389	17.5063	19680.7	6.07626	46.7563	3.85186	132.34	0.399509	62.52	11.0371	87.0232	2.20741	51.0316	13.0001	18.1085	2
140800	2008	69.8051	99.8331	29.4761	80.9311	4.58768	12.559	3838.7	3.79468	39.25	4.9231	44.9071	0.00683839	35.23	9.53572	69.0904	1.47478	76.4949	10.5933	8.42315	2
140800	2009	74.6033	99.8401	30.4939	76.7404	4.96253	9.30729	4156.08	3.3498	38.4226	5.27672	55.5465	0.00417801	36.64	9.57194	73.2499	1.25154	77.0401	11.7088	7.92206	2
140800	2010	76.4431	99.8061	30.6282	75.9124	5.50083	10.5673	4741.28	3.74557	39.1691	5.60587	68.4747	0.00806662	37.56	9.70673	74.473	1.20026	79.5313	12.3956	8.67998	2
140800	2011	67.5212	99.7167	33.8507	87.1788	6.98145	12.0281	5690	3.87845	39.779	5.84792	74.6209	0.02751	39.51	9.88732	85.3232	1.3293	77.4529	14.6564	9.60458	2
140800	2012	67.4983	99.69	35.2109	88.4746	7.74416	12.0056	6458.06	4.13843	40.2692	6.13491	84.4464	0.0422971	41.41	9.93162	86.4458	1.49374	79.1313	13.6166	10.2169	2
140800	2013	68.6513	99.7725	36.549	87.8748	7.74869	11.4263	7284.69	4.31183	40.6835	6.40299	92.3933	0.0718542	43.06	9.99079	87.7176	1.34783	79.4804	14.4234	10.7341	2
140800	2014	67.6892	99.7936	37.4952	88.806	8.16305	13.2005	8125.35	4.22079	41.117	6.62931	101.781	0.0780662	44.45	10.0381	87.6555	1.8037	79.2784	15.2743	11.5096	2
140800	2015	66.4443	99.7471	38.463	88.7772	8.03183	15.7096	8718.5	4.36332	41.8421	6.76825	99.6297	0.0765662	46.12	10.0437	89.143	1.84196	78.2027	16.1547	12.4057	2
140800	2016	65.3532	99.7174	39.4473	89.2376	8.30426	13.4509	9364.54	4.25749	41.5614	4.7344	103.006	0.0768584	47.65	10.0441	88.9449	1.46706	77.4317	14.484	12.3131	2
140800	2017	65.7487	99.7705	40.4153	87.6166	8.12704	14.3862	9991.96	4.43336	42.1375	2.68754	112.539	0.0997686	48.94	10.1677	87.7958	1.87983	78.1743	13.5341	12.9746	2
140800	2018	63.8286	99.8469	41.3559	88.1273	8.28721	15.7481	10915.9	4.36927	42.5847	2.80493	121.431	0.117052	50.2	10.2897	85.5008	1.76279	77.4191	14.4137	13.7114	2
140800	2019	59.5396	99.7332	41.4666	90.686	8.90572	16.296	11996.5	4.98254	43.4991	2.89797	127.423	0.128775	51.24	10.3225	84.7265	1.89687	76.2535	14.5168	14.5767	2
140800	2020	60.434	99.7515	41.5699	88.0185	8.81257	16.682	12947.1	5.26507	44.1286	3.00551	153.227	0.198827	51.24	10.374	84.1422	1.8535	75.7695	14.3657	15.2821	2
140800	2021	61.4544	100.014	41.5612	85.456	8.5881	14.7316	14281	5.19455	44.2244	3.08458	167.866	0.304833	50.26	10.5971	82.8757	1.54871	74.602	10.9623	15.5708	2
140800	2022	60.9989	100.544	38.8847	82.6191	8.74276	17.0596	15266.9	5.34461	45.0886	3.13602	178.068	0.377784	50.93	10.7112	83.4123	2.12286	75.5536	13.0521	16.3615	2
140800	2023	61.8679	100.425	40.7487	79.9546	8.49452	15.0408	16640.9	5.36784	45.214	3.3522	175.636	0.430525	52.53	10.7238	82.2149	1.58122	74.1789	14.3112	16.8425	2
140900	2008	58.7754	98.9861	16.1843	95.8965	6.04355	8.93914	2858.74	2.49387	35.9217	2.35536	32.7271	0.0102416	36.71	9.23634	88.1207	1.07824	59.2106	10.602	5.33074	2
140900	2009	60.144	98.6488	16.4047	94.9273	6.36003	10.6629	3061.19	2.56117	36.181	2.58158	32.574	0.00299205	37.52	9.33974	89.4607	1.39693	54.4102	10.1229	5.82158	2
140900	2010	61.5143	98.6049	16.8892	94.0561	6.67631	10.4368	3487.31	2.83232	36.5413	2.82705	40.7966	0.00619956	37.86	9.56268	85.9415	1.36852	62.2071	13.0738	6.18088	2
140900	2011	63.0382	98.2174	17.0013	93.3785	7.00072	12.3797	4184.94	3.06278	37.1104	3.00925	46.2312	0.0432923	39.8	9.79159	89.2581	1.34862	62.5285	9.62899	7.02979	2
140900	2012	64.3594	98.4954	17.5193	92.7896	7.15291	11.1968	4833.68	3.24234	37.4257	3.20032	47.97	0.0685736	41.43	9.90501	89.5805	1.30215	61.8563	12.3536	7.28724	2
140900	2013	65.1079	98.8089	17.9918	92.6573	7.72335	11.7747	5491.06	3.29666	37.8786	3.416	57.2301	0.0707138	43.04	9.95349	89.7821	1.54309	63.197	13.967	7.81075	2
140900	2014	65.1444	99.6246	18.4392	92.2751	8.77485	11.0841	6104.41	3.52867	38.4889	3.56691	61.8618	0.0928182	44.66	9.98833	89.7894	1.30019	64.1978	12.7135	8.15514	2
140900	2015	65.136	99.3783	18.9366	90.5603	9.62359	12.5324	6550.03	3.2245	38.3978	3.71644	40.7462	0.0809051	46.31	10.009	89.2001	1.38375	52.0451	13.122	8.54259	2
140900	2016	65.2884	98.7716	19.5588	89.3261	10.0206	15.9927	7024.78	3.70272	39.3281	2.4556	43.0475	0.095414	47.9	10.0541	88.9413	1.93175	54.2686	14.2652	9.69645	2
140900	2017	65.2881	98.093	20.3333	88.2346	11.3968	12.0484	7587.81	3.97641	38.8349	2.12684	48.8485	0.110763	49.44	10.2539	85.7767	1.45827	55.8227	16.7131	9.40384	2
140900	2018	64.4314	98.7482	20.9903	87.3028	11.4541	14.088	8301.7	4.13956	39.8113	2.31676	52.3545	0.163419	50.95	10.3771	90.8215	1.44904	57.582	20.8706	10.2814	2
140900	2019	67.9899	99.2575	21.1284	79.4148	11.4731	16.3288	9183.11	4.52963	41.0467	2.51974	53.2775	0.179092	52.79	10.3932	91.0912	2.0222	51.8365	18.5094	11.4153	2
140900	2020	68.6511	99.798	21.1712	77.4833	12.5242	12.7762	9926	4.54814	40.8871	2.69569	62.3523	0.255504	53.78	10.4289	90.9871	1.62982	51.6303	18.1343	11.152	2
140900	2021	69.1936	100.495	21.2918	75.8979	12.4507	16.1535	11058	4.57085	42.0428	2.82439	66.8797	0.387164	54.7	10.6934	89.94	2.10734	50.018	15.5929	12.4066	2
140900	2022	68.1194	101.771	20.0587	73.983	12.5621	18.7794	11809.7	4.69179	43.2405	2.89979	72.8846	0.433298	55.34	10.8072	89.9822	2.13227	51.4553	14.0918	13.2521	2
140900	2023	67.389	101.627	20.1752	73.4041	12.6293	16.4926	12908	4.71928	43.1362	2.99769	84.1003	0.471297	56.53	10.7704	89.6153	2.15157	53.4851	16.9586	13.3746	2
141000	2008	66.1178	100.944	17.2696	128.292	6.14679	12.2206	4438.86	3.65525	38.9738	4.66604	36.0275	0.0123163	37.44	9.76833	90.0536	1.38424	59.0974	9.63817	7.55538	2
141000	2009	66.6547	100.503	17.5193	128.174	6.05953	11.8853	4801.92	3.48187	38.67	4.89121	37.9876	0.00726907	38.25	9.77263	91.1423	1.43187	59.7027	9.0931	7.60944	2
141000	2010	66.4099	100.229	17.4084	129.908	6.06072	11.4236	5350.95	4.28731	39.4641	5.12709	48.9337	0.0159351	40.78	9.92106	92.1935	1.33797	65.189	9.68958	8.15415	2
141000	2011	66.984	100.071	17.0369	136.348	6.75415	12.6383	6157.53	4.38586	39.8565	5.35139	53.026	0.0635944	42.39	10.1587	92.3905	1.48848	67.0865	11.734	8.80788	2
141000	2012	66.2276	100.321	17.6645	140.768	6.9408	11.5247	6983	4.57399	40.2158	5.54607	57.609	0.0911275	44.07	10.2653	92.4995	1.30029	68.0423	10.5513	9.144	2
141000	2013	65.4893	100.669	18.2246	142.491	6.98004	15.2073	7862.09	4.7733	41.3998	5.74077	59.6521	0.112338	45.67	10.2629	93.0869	1.59176	68.7556	12.223	10.4177	2
141000	2014	66.5357	100.884	18.2196	136.922	6.78769	11.5636	8754.83	5.4973	41.9262	5.8726	66.9247	0.130298	47.14	10.2499	93.5892	1.52161	70.896	11.1951	10.538	2
141000	2015	66.4563	100.39	18.3029	130.189	5.60828	13.6283	9376.42	4.66564	41.3948	2.96854	63.5504	0.129977	48.62	10.2023	94.1889	1.77624	67.6213	13.3497	10.8416	2
141000	2016	66.4166	99.9109	18.4734	127.172	5.65391	14.3646	10004.6	4.49883	41.3073	3.07404	64.9481	0.139512	50.03	10.2317	94.2231	1.68013	66.5989	13.5224	11.2168	2
141000	2017	66.7437	99.6527	18.6925	123.184	4.92194	12.161	10741.7	4.423	41.0138	2.48275	68.0924	0.169781	51.4	10.3252	93.7364	1.57822	66.298	14.9101	11.1496	2
141000	2018	67.4856	99.9625	18.8544	117.616	4.55851	14.643	11630.5	4.40678	41.7799	2.58606	70.1641	0.202795	52.54	10.412	93.5249	1.72274	67.5156	15.4561	12.0911	2
141000	2019	65.9011	100.342	18.7901	115.236	4.32152	15.5013	12808.8	4.02362	41.9786	2.6851	74.205	0.243411	53.56	10.4256	93.6981	1.68479	64.5748	14.2281	12.6415	2
141000	2020	66.4512	100.156	18.7683	111.956	4.15256	15.2325	13782	4.25266	42.3652	2.78366	93.2785	0.269774	53.17	10.4631	93.0437	1.68108	64.4599	14.0297	13.1874	2
141000	2021	66.2701	101.124	18.5707	106.686	3.87411	16.601	15293.6	4.21206	43.3414	2.83255	110.141	0.316203	54.15	10.7032	92.4584	1.93197	66.8336	10.3387	14.1911	2
141000	2022	64.7268	103.238	18.0972	105.132	3.93172	13.021	16333.6	4.33745	44.0298	2.86284	116.633	0.336056	54.77	10.8601	92.2994	1.76315	67.6126	11.7519	14.0861	2
141000	2023	63.7212	102.392	18.5198	103.63	3.9894	16.9494	17787.3	4.37061	44.7224	2.89288	135.29	0.337724	55.91	10.8985	91.7762	1.97252	70.1329	12.3711	15.5666	2
141100	2008	51.3975	99.3807	13.9229	35.8895	4.07927	8.48741	3232.81	2.41055	35.9729	2.91545	40.7529	0.00537733	35.8	9.72423	85.4736	1.13158	53.1554	9.64571	5.09504	2
141100	2009	54.5056	97.1481	14.9796	34.5874	3.83996	12.1166	3464.11	2.50159	35.8505	3.15158	51.9772	0.00101124	36.63	9.68332	87.2563	1.41792	47.312	10.5853	6.01817	2
141100	2010	56.084	96.7255	15.8691	34.5018	3.73804	13.5387	3937.25	2.90667	36.5044	3.46076	64.5849	0.0122843	37.91	10.001	87.9859	1.4351	61.9916	10.0396	6.80258	2
141100	2011	58.0938	96.5711	11.6179	34.2407	3.6167	11.9394	4800.52	2.96864	36.2923	3.77146	69.3809	0.0238882	39.71	10.2768	87.6384	1.56008	57.554	12.8882	6.64017	2
141100	2012	58.6552	97.3891	13.411	34.5679	3.55593	11.3924	5428.78	3.12348	36.9679	4.0131	70.4381	0.0297796	41.15	10.3499	88.2568	1.44115	58.2795	10.3415	7.10353	2
141100	2013	59.0838	98.8488	15.0662	34.4613	3.44853	13.8509	6139.95	3.28433	38.4066	4.25051	78.3131	0.0275961	42.85	10.3479	88.3424	1.62498	60.4143	11.421	8.1844	2
141100	2014	58.0309	100.1	15.2229	34.7918	3.38279	13.2003	6753.94	3.52442	39.2427	4.37919	82.9972	0.0626319	44.41	10.2467	91.1008	1.61174	57.9163	13.7674	8.51104	2
141100	2015	57.7273	98.804	15.5811	35.1339	3.31476	14.6713	7192.95	2.04032	37.5112	4.53773	55.2373	0.0834977	46.12	10.1132	91.9357	1.56199	46.4142	13.1691	8.30013	2
141100	2016	58.6701	96.6781	16.2962	35.488	3.24431	16.0219	7644.38	3.17504	38.1885	2.23151	61.1695	0.130115	47.71	10.1447	92.6949	1.7219	48.6086	15.0623	9.33053	2
141100	2017	60.5202	95.2233	17.3025	35.855	3.17132	14.5624	8232.31	2.91885	37.3016	1.87779	62.6293	0.123998	49.08	10.4171	91.4492	1.7847	44.4241	15.7664	9.30164	2
141100	2018	60.4035	97.075	18.0184	33.6975	3.19004	17.3571	9033.5	3.69943	39.5757	2.01855	60.4709	0.17471	50.31	10.4926	91.9476	2.00704	38.6712	18.8084	10.7066	2
141100	2019	58.5418	100.326	18.2102	34.3209	3.51452	13.893	9963.34	2.89899	39.7747	2.18804	77.8918	0.204045	51.94	10.5552	94.0286	1.7191	42.6523	18.5053	10.2142	2
141100	2020	57.4972	101.736	17.8995	33.8951	3.64248	17.1363	10656	3.06513	41.2011	2.26698	91.1237	0.243767	53.31	10.5748	94.1772	1.95718	36.5234	17.5433	11.2485	2
141100	2021	57.2439	101.798	17.5834	33.4181	3.67034	14.0215	11754	2.94411	40.8805	2.30809	110.221	0.307649	54.28	10.8749	93.0497	1.57122	40.7694	12.1877	11.1225	2
141100	2022	55.3343	103.317	17.0391	32.8899	3.8442	18.1283	12518.2	3.18837	42.5702	2.24855	132.932	0.517334	54.9	11.0302	93.4093	2.11405	43.8134	10.9157	12.3619	2
141100	2023	54.2232	102.414	16.6374	32.2031	3.99899	14.3158	13682.4	3.19826	41.8765	2.26746	131.144	0.571468	56.1	11.0076	93.2509	1.6042	42.2701	13.4101	12.1499	2
150100	2008	85.8991	99.2666	37.016	74.7567	10.5143	4.32465	7051	3.7737	38.7412	3.60099	43.2785	0.140798	47.04	10.98	71.681	0.478923	29.9529	14.7175	9.33363	2
150100	2009	87.0672	99.0831	38.0656	80.841	12.0483	5.34756	7802	3.71869	38.9521	3.82228	44.0038	0.166985	52.24	11.1886	72.4904	0.565995	30.4817	10.657	9.97689	2
150100	2010	87.6987	99.2934	38.6847	92.7445	13.5308	4.60012	8746	3.61288	39.023	4.07933	43.277	0.212541	47.95	11.3056	72.4806	0.553548	28.5768	11.4283	10.3241	2
150100	2011	88.6759	99.3442	38.4124	95.1437	13.7821	3.14284	10038	3.63406	39.1573	4.35475	47.581	0.291358	63.79	11.4481	72.5997	0.374646	27.2061	8.70493	10.6996	2
150100	2012	88.4925	100	39.6647	95.3461	14.1324	5.04096	11361	3.75135	40.2431	4.50268	52.9543	0.378827	65.21	11.5852	73.1145	0.571535	28.8333	12.2071	11.8937	2
150100	2013	89.3175	100.269	40.8074	101.426	14.6491	4.53457	11398.4	4.19077	40.7819	4.69453	76.774	0.446875	66.24	11.6599	72.6272	0.5033	37.8863	11.8342	12.1381	2
150100	2014	89.3448	100.841	40.6719	109.108	15.9463	7.49343	12538	4.01885	41.5373	4.85862	64.6487	0.490194	67.49	11.7089	72.5023	0.913448	34.6693	14.8595	13.1915	2
150100	2015	90.2845	100.663	41.1476	113.796	16.8335	7.59986	13491	3.97249	41.6688	5.06491	57.649	0.500192	68.2	11.7717	71.0435	0.927164	31.5016	12.2862	13.7159	2
150100	2016	89.467	100.485	41.5057	120.658	17.6821	6.00134	14517	4.19228	41.8151	4.21462	61.8744	0.514811	69.08	11.7882	67.9019	0.749699	39.4478	8.8719	14.0397	2
150100	2017	91.1152	100.92	41.0253	108.898	17.9663	5.35879	15710	4.23157	42.2267	4.36257	54.2817	0.507342	69.83	11.7364	71.2214	0.627064	35.7978	7.75752	14.5333	2
150100	2018	87.2368	101.171	40.5504	116.425	21.0373	4.59195	17190	4.58202	42.7777	4.55137	58.3666	0.561265	69.82	11.6787	74.0711	0.541651	40.0886	11.7178	15.193	2
150100	2019	82.4116	100.869	40.2068	123.333	23.3204	5.11005	18974	5.19921	43.6955	4.71518	60.1495	0.595276	70.5	11.627	75.5901	0.613431	39.5475	8.16223	16.3533	2
150100	2020	79.0493	100.583	39.9738	127.965	28.7948	4.42278	20489	5.27655	43.6643	4.91995	54.54	0.663825	79.14	11.6186	78.4033	0.551749	33.8093	10.3058	16.9292	2
150100	2021	76.1667	101.463	39.392	145.911	29.9506	7.12213	22435	5.35788	44.9482	5.04833	58.5301	0.80777	79.68	11.715	80.251	0.867993	33.2527	6.7074	18.3785	2
150100	2022	75.1112	102.848	42.8099	143.864	28.6577	6.94488	23938	5.47354	46.232	5.10034	72.6068	0.695678	79.8	11.7678	80.2043	0.872678	35.8572	8.84206	19.4541	2
150100	2023	76.6716	102.183	46.3075	115.305	29.063	7.27162	25518	5.618	46.7403	5.20532	73.3489	0.780411	80.7	11.8955	77.424	0.886212	37.005	8.80473	20.6698	2
150200	2008	107.386	99.2379	47.1814	37.0337	1.92504	3.30193	7076.1	4.46296	40.3268	4.8165	47.9399	0.147365	75.9	11.3	70.9127	0.386084	35.4585	6.49339	10.6824	2
150200	2009	108.753	99.135	48.2652	39.9091	2.30351	3.46549	7826.38	4.56854	40.6606	5.21771	51.9378	0.109994	77.9	11.5005	72.1134	0.359975	36.4364	6.60405	11.2474	2
150200	2010	110.272	99.9964	50.5928	42.3411	2.65264	5.16909	8766.4	4.34906	41.4106	5.30004	54.5505	0.158969	79.49	11.6259	72.6578	0.664359	30.8639	7.47471	12.1779	2
150200	2011	111.413	99.8535	57.4127	44.9231	3.00675	3.77976	10059	4.40685	41.8536	5.36481	61.0228	0.229223	80.5	11.8167	72.4602	0.41426	28.899	8.52425	13.1653	2
150200	2012	112.035	99.2699	51.7608	47.9616	3.39014	6.33882	11421	4.43679	42.1129	5.57253	65.441	0.279559	81.36	11.9353	72.9497	0.813933	28.8262	10.381	13.8733	2
150200	2013	113.29	99.5929	45.8735	48.6066	3.70603	3.94135	11547	4.8622	42.0577	5.63098	76.2508	0.232754	82.01	11.9556	72.8027	0.442778	33.0534	8.4565	13.2273	2
150200	2014	120.686	100.259	45.9814	50.5053	3.64825	4.59917	12713	4.75035	42.6824	5.77346	81.0835	0.304052	82.34	11.9988	68.5721	0.504222	35.232	9.07119	14.0347	2
150200	2015	114.694	100.469	45.6489	57.0075	4.1189	5.28141	13667	4.87839	43.1843	5.89387	79.0201	0.26855	82.65	12.0213	69.6133	0.633131	34.2515	7.4854	14.578	2
150200	2016	117.638	100.504	45.7188	55.6426	4.20754	6.9342	14692	5.14436	44.0253	4.12529	79.0009	0.317875	82.97	12.0591	64.2215	0.811164	36.3954	7.14399	15.5848	2
150200	2017	110.132	101.165	45.6462	53.5795	4.70825	8.16289	15901	5.19828	44.7939	4.28392	79.8748	0.270669	83.28	11.9331	67.5727	0.879957	37.1133	7.37989	16.3326	2
150200	2018	93.9021	102.18	44.6722	67.1063	5.34506	6.3428	17435	5.67265	45.648	4.44415	78.5041	0.305858	83.57	11.7889	70.0601	0.671438	37.0863	9.52077	16.6515	2
150200	2019	98.3613	103.148	43.3186	62.1615	5.40767	7.99483	19174	5.65503	46.7107	4.63689	83.5361	0.328294	83.9	11.7004	65.6805	1.02096	37.3635	8.05301	17.8163	2
150200	2020	99.7783	103.222	41.9663	61.2491	5.44393	6.20917	20710	5.71965	46.8735	4.73075	91.3074	0.345074	86.15	11.7292	63.8703	0.695169	35.4972	7.32327	18.1913	2
150200	2021	93.2507	102.788	40.8188	66.575	6.12539	5.26883	22791	5.78536	47.0295	4.99249	100.54	0.382175	86.73	11.8982	67.2603	0.587122	35.3815	7.84149	18.8675	2
150200	2022	88.3622	103.247	69.8422	61.0536	7.13978	5.84404	24250	5.80729	49.0492	5.10694	133.777	0.487327	86.89	12.0282	69.9559	0.628376	37.5158	7.52188	22.0367	2
150200	2023	88.2021	102.769	57.2648	58.3499	7.9512	5.37942	25802	6.10599	48.8497	5.31116	137.292	0.490087	87.56	12.1565	68.5578	0.599445	37.4396	7.14888	21.8126	2
150300	2008	45.6966	99.29	64.9633	87.3055	0.000591166	3.58564	6734.5	6.93478	43.4378	4.84137	29.5523	0.229718	93.26	10.8146	62.1622	0.40113	47.8054	5.76403	12.1527	2
150300	2009	47.2554	99.0534	67.7037	88.4008	0.000608205	5.33348	6982.79	6.79916	43.6795	5.01232	61.9463	0.228796	94.05	11.0784	63.0607	0.650453	51.2696	6.7666	12.7895	2
150300	2010	50.0156	96.6004	55.0494	89.5606	0.000664761	4.3397	8445.17	6.95825	42.4539	4.97575	73.2854	0.156178	94.24	11.2091	64.9032	0.476425	47.4483	9.10743	12.3434	2
150300	2011	44.3274	92.5953	72.2759	112.911	7.55723	4.58821	9589.45	7.9955	42.6604	5.48516	101.72	0.166576	94.44	11.4	69.8113	0.531643	45.7601	10.532	14.656	2
150300	2012	48.4391	96.2598	61.7616	110.931	7.84111	5.312	10733.7	8.50112	44.6372	5.65485	105.458	0.184633	94.47	11.5392	66.8161	0.673724	42.7125	13.4418	14.9078	2
150300	2013	50.5647	98.0874	49.3836	108.903	8.30332	4.36933	11878	8.89371	45.356	5.93489	110.792	0.224404	94.59	11.5434	67.2993	0.550978	41.57	9.2475	14.5527	2
150300	2014	53.1244	98.0996	50.3403	114.736	8.28797	6.66713	13422	8.8172	46.1093	6.35085	92.4301	0.313028	94.57	11.5944	65.864	0.842285	40.3281	13.5817	15.8462	2
150300	2015	54.1661	98.0769	54.1661	120.711	8.72161	5.6202	14402	8.83621	46.3833	6.65184	92.5062	0.236305	94.58	11.7427	65.7224	0.676579	41.8948	10.2229	16.4788	2
150300	2016	55.147	99.4734	54.4528	118.696	8.97544	7.89797	15475.2	9.10284	47.8943	4.51974	92.0178	0.378702	94.63	11.7757	63.9161	0.909618	40.6102	14.881	17.6508	2
150300	2017	51.9733	101.061	53.8812	113.535	9.97684	5.71348	16821.4	8.16327	47.4891	4.54861	97.9553	0.451045	94.74	11.7067	71.953	0.645903	42.3345	8.93296	17.4118	2
150300	2018	44.8151	101.668	52.9974	140.609	11.1996	7.36811	18418	8.34101	48.457	4.65416	109.491	0.40311	94.98	11.6326	72.6968	0.944663	38.0484	6.53849	18.4291	2
150300	2019	41.2413	103.569	51.461	148.256	12.8974	5.53915	20296	7.88599	48.802	4.60975	112.84	0.390669	95.2	11.7379	73.9895	0.72508	36.9463	4.69341	18.6729	2
150300	2020	38.7956	106.491	48.3243	157.527	14.0012	4.24731	21812	7.71363	49.815	4.44447	151.101	0.432877	95.37	11.7594	75.9649	0.583754	41.0971	5.06888	18.8861	2
150300	2021	34.9114	110.346	43.5467	177.826	16.3613	7.45611	23797	7.67391	52.0383	4.28682	169.771	0.438551	95.88	12.0026	81.2721	0.889742	41.1286	6.33794	20.1137	2
150300	2022	34.1907	110.406	41.7607	155.796	18.452	5.97692	25224	7.82881	52.187	4.02802	199.489	0.309504	95.95	12.1145	78.268	0.797467	43.437	5.12259	20.461	2
150300	2023	35.0803	105.586	41.7471	146.709	19.9916	7.61261	26813	7.84387	50.8032	3.87312	227.265	0.404773	96.38	11.9963	81.1463	0.908417	43.5265	3.39327	21.4512	2
150400	2008	53.5507	99.4412	21.0734	0.236986	7.86263	5.29406	3850	3.98457	37.5058	2.01289	48.7021	0.0787774	24.64	9.71003	78.9384	0.663977	49.56	12.4545	6.16321	2
150400	2009	54.6234	99.0722	22.7979	18.8656	8.54346	4.40305	4086	3.4426	36.7606	2.14671	50.1672	0.0997898	25.07	9.89749	80.982	0.556487	48.9608	14.2874	6.00721	2
150400	2010	55.6165	99.6844	23.4725	36.9437	9.16927	6.16206	4549	3.88879	37.8881	2.23867	62.6048	0.095159	23.92	10.0745	81.1604	0.677835	55.64	14.7385	6.87018	2
150400	2011	56.972	99.9079	26.7887	54.0341	9.69397	4.88919	5574	4.87782	39.2285	2.37988	73.2521	0.0966562	24.11	10.2851	80.9564	0.506174	54.3884	15.9631	7.90832	2
150400	2012	57.2506	100.19	23.8269	71.4843	10.3582	5.65201	6428	5.36745	40.0272	2.5362	74.4631	0.126666	24.41	10.4349	80.8123	0.717751	53.6397	15.7241	8.47782	2
150400	2013	57.3345	100.584	20.7945	88.6514	11.0073	6.02139	7284	6.03586	40.9947	2.70408	78.4809	0.19134	24.53	10.5	80.6271	0.77369	58.7401	16.1198	9.05187	2
150400	2014	58.3369	100.995	20.6405	103.481	11.4165	5.69253	8114	6.03911	41.3124	2.87068	81.5121	0.21552	24.56	10.55	78.9318	0.76393	62.4489	17.6458	9.42148	2
150400	2015	59.4621	101.312	20.644	116.874	11.738	6.27143	8812	6.15567	41.8308	3.04796	78.5008	0.221051	29.76	10.6024	77.605	0.745209	59.7845	18.2639	9.9627	2
150400	2016	62.472	101.519	20.4033	125.205	11.6453	4.91989	9517	5.86948	41.5991	2.32063	74.5561	0.2115	30.82	10.6396	73.7234	0.618518	54.3	16.7579	9.96169	2
150400	2017	67.7885	102.547	20.0004	126.562	11.0406	7.76229	10352.3	5.13445	41.9653	2.39222	78.456	0.197815	30.86	10.5417	76.3076	0.878601	59.2553	16.1148	10.6577	2
150400	2018	65.0857	102.076	19.5936	143.501	11.5145	4.62719	11373	5.47152	41.8344	2.54585	91.9165	0.21614	30.89	10.4272	78.6882	0.495512	54.5731	19.155	10.6404	2
150400	2019	65.9894	101.22	19.3561	138.386	11.0697	6.28937	12620	5.47827	42.0883	2.71548	100.134	0.225765	30.98	10.5222	77.9304	0.733788	54.71	19.3131	11.5541	2
150400	2020	65.2238	101.496	19.0753	143.309	11.8699	7.65461	13740	5.49918	42.6781	2.89161	118.355	0.278204	53.1	10.5604	78.2185	0.918525	54.0231	17.3982	12.3534	2
150400	2021	61.5481	102.181	18.6649	200.642	14.3486	4.60201	15279	5.56638	42.7884	3.03815	129.593	0.365444	53.7	10.6806	81.8547	0.519653	54.1414	17.126	12.4978	2
150400	2022	59.4716	103.543	25.9275	144.047	17.8331	8.4657	16547	5.78186	44.7172	3.26587	154.047	0.503906	54.64	10.7645	82.7034	0.948645	56.2924	17.5475	14.5633	2
150400	2023	58.0963	103.17	32.7892	144.894	21.1586	4.6986	17871	5.71233	44.4169	3.47225	160.473	0.546096	55.57	10.7871	82.2978	0.53056	55.7221	18.6609	15.0089	2
150500	2008	36.8218	100.042	21.307	132.028	2.91292	6.08056	5009	5.81907	40.2041	1.71529	29.9277	0.0592674	37	10.061	80.1632	0.762391	55.0414	13.0534	7.51018	2
150500	2009	37.105	100.549	9.4593	163.457	3.58241	6.25654	5315	5.2968	39.3654	1.7501	23.3306	0.0574561	39.94	10.314	82.1227	0.684659	54.2789	15.4031	6.49335	2
150500	2010	37.4821	100.533	22.0437	157.945	3.73845	3.69726	6002	5.75373	40.2226	1.82544	30.4884	0.0786431	39.28	10.5165	82.3145	0.467507	54.767	15.8707	7.60964	2
150500	2011	37.8844	100.541	22.5273	146.116	3.56978	5.51672	7216	6.14067	41.2725	1.84809	34.3857	0.0879137	38.78	10.7202	81.6757	0.635205	53.0174	17.3429	8.79	2
150500	2012	37.3321	100.798	21.8449	143.955	4.41002	4.72342	8501	6.56935	41.9674	1.90586	39.5374	0.0976179	38.95	10.8762	82.6385	0.639129	56.2935	18.5731	9.42487	2
150500	2013	37.1725	101.203	21.0872	141.571	4.2106	4.0859	8924	7.12804	42.7048	1.97091	43.2978	0.116875	39.33	10.9237	82.416	0.555167	58.2681	17.6952	9.72454	2
150500	2014	37.1621	101.11	20.8589	151.077	3.81578	4.86609	9932	7.09311	43.021	2.06286	41.0607	0.123566	38.86	10.9865	81.9415	0.581865	58.7549	16.7648	10.3386	2
150500	2015	37.9849	100.747	20.8371	145.532	3.41517	4.41035	10757	7.25267	43.2053	2.1886	39.9523	0.140191	37.99	10.9816	81.008	0.546396	59.2129	16.2137	10.7422	2
150500	2016	38.8958	100.504	20.7325	141.669	3.21257	7.0157	11585	7.21084	43.6979	1.91066	35.5333	0.153527	30.21	11.0204	79.8139	0.873865	55.0746	14.9619	11.63	2
150500	2017	48.4641	100.25	20.6809	101.105	2.64142	4.42129	12566	5.92539	42.1879	1.97592	34.7398	0.1562	48.56	10.8482	83.9038	0.564809	54.5212	14.0329	11.1763	2
150500	2018	46.9579	100.292	20.6207	109.252	2.72639	5.79135	13797	6.65922	43.4949	2.03829	42.0946	0.178218	49.43	10.6259	83.5449	0.709135	58.4331	19.6151	12.3667	2
150500	2019	47.0426	100.483	20.5206	105.435	2.53104	7.95342	15322.6	6.88715	44.5592	2.09565	45.6863	0.224988	50.15	10.5958	83.4078	0.869899	60.6007	19.6331	13.6447	2
150500	2020	47.3282	101.063	20.3048	101.508	2.84883	9.10012	16671	7.00338	45.4348	2.16465	50.6284	0.25014	50.02	10.6069	82.2133	1.01006	58.8593	19.8059	14.5937	2
150500	2021	45.3322	102.155	19.8774	90.7038	1.97186	4.86855	18405	7.24218	45.9394	2.17543	52.6145	0.313644	50.63	10.7098	84.3993	0.510434	59.0995	19.2025	14.7341	2
150500	2022	42.8472	103.996	23.4313	85.0231	1.69387	5.66751	20006	7.41668	47.6064	2.28209	70.9464	0.396158	51.02	10.8115	87.1509	0.612092	61.1066	19.6086	16.0702	2
150500	2023	41.6606	103.05	26.9277	81.0863	1.37898	4.97073	21667	7.48792	47.7899	2.41004	77.6172	0.4052	51.9	10.8411	87.192	0.521147	60.8628	24.1358	17.0444	2
150600	2008	51.669	99.1635	27.8605	74.781	3.8602	3.93721	7052	5.8444	40.447	3.3973	28.2232	0.0765107	73.85	11.5814	60.2795	0.458463	44.8303	11.5219	8.90372	2
150600	2009	52.8497	99.5186	29.2077	80.0712	4.60937	3.92214	7803	5.8435	40.8265	3.48099	16.1217	0.101592	78.31	11.8815	61.676	0.441372	44.8525	13.1336	9.41621	2
150600	2010	53.3085	99.1863	29.0788	86.637	5.42395	3.66945	8756	6.03105	41.053	3.61364	56.4251	0.131137	69.51	12.0637	61.6942	0.415224	47.2753	12.3019	9.92033	2
150600	2011	53.3514	99.3106	24.864	93.8127	6.27898	5.76676	10047	5.95032	41.4439	3.78023	60.3286	0.161907	70.67	12.2232	63.6018	0.762566	44.5595	13.2355	10.5813	2
150600	2012	54.1798	99.7416	29.7002	99.1773	7.0103	6.89795	11416	6.02451	42.4439	3.95974	62.626	0.194309	71.7	12.3901	63.1062	0.768191	46.5672	12.1329	11.9387	2
150600	2013	53.6798	101.384	34.0014	102.583	7.82147	6.29803	12107.4	6.40888	43.7869	4.0742	70.334	0.283282	72.35	12.4544	63.1325	0.690871	45.6807	10.0905	12.7424	2
150600	2014	53.9612	103.214	33.1557	112.957	8.15945	6.15601	13439	6.13841	44.5369	4.10979	69.8941	0.303409	72.45	12.4683	61.2752	0.714931	47.3557	10.014	13.24	2
150600	2015	53.5771	104.071	31.8588	122.038	8.81749	6.13953	14420	5.95407	44.8584	4.08296	66.0716	0.275736	72.76	12.5011	60.094	0.813619	47.6905	11.3882	13.5508	2
150600	2016	55.1673	103.337	31.0345	118.652	8.97213	6.98475	15480	5.8736	44.8429	2.72524	81.7462	0.2779	73.07	12.5349	57.621	0.729497	55.9935	9.70049	14.1416	2
150600	2017	59.2458	102.838	30.1782	99.5987	8.75216	7.5847	16729	5.26566	44.4184	2.76588	72.6274	0.272968	73.71	12.4454	57.1118	0.876847	54.0759	11.2244	14.5788	2
150600	2018	57.4315	103.51	29.155	109.721	8.73933	7.01537	18289	5.64068	45.3486	2.84057	87.5065	0.297643	74.49	12.3558	62.298	0.865482	55.9129	11.2949	15.3311	2
150600	2019	53.3784	103.726	28.1053	114.546	9.96481	6.62388	20075	6.10745	46.2017	2.90048	99.8582	0.273052	75.08	12.3006	66.5603	0.695787	56.3413	9.87522	16.2196	2
150600	2020	51.8759	102.863	27.323	117.807	10.4709	6.93015	21576	6.20605	46.3157	3.00975	107.719	0.303909	77.44	12.2776	67.7983	0.746811	57.481	10.113	16.9604	2
150600	2021	49.3803	102.772	26.5881	125.721	11.5673	8.7777	23583	6.18683	46.9713	2.98489	68.5179	0.320675	78.08	12.5631	71.1361	1.01506	57.1851	9.98396	18.1987	2
150600	2022	49.4962	104.692	35.303	108.995	12.7462	6.99926	25234	6.34096	48.4612	3.05829	82.5372	0.37117	78.1	12.7312	69.2706	0.765087	53.1962	8.61849	19.5325	2
150600	2023	48.9162	104.498	43.2633	105.212	14.337	8.96193	27151	6.47241	49.641	3.21681	88.0148	0.38321	79.19	12.764	67.9819	1.03636	54.4092	9.50467	21.5639	2
150700	2008	44.5437	99.5263	8.16444	89.1551	4.63919	3.10909	5061	3.02658	35.952	0.979593	157.244	0.055471	66.8	10.0527	84.0728	0.421771	52.3592	9.02448	4.69388	2
150700	2009	45.1998	99.4399	8.21043	95.4882	5.51369	4.41291	5606	3.44305	36.6658	1.00722	83.0691	0.0668106	66.74	10.2638	85.1836	0.495178	53.2037	10.8942	5.42071	2
150700	2010	45.4588	99.5797	8.24508	102.466	6.42011	4.37122	6295	3.8801	37.317	1.06106	96.0844	0.0647152	70.56	10.4445	85.1077	0.509961	54.6749	13.3406	5.97313	2
150700	2011	46.8939	99.5344	8.28365	106.731	7.14362	4.33968	7641	4.04335	37.7946	1.0974	101.344	0.0772307	66.2	10.6539	83.876	0.582064	53.9881	16.5726	6.74256	2
150700	2012	47.4799	99.1976	8.35066	113.172	7.99951	5.30895	8807	4.35226	38.4029	1.14152	95.1928	0.0791312	69.98	10.8226	83.9285	0.608738	53.2292	15.0193	7.65967	2
150700	2013	48.163	99.2582	8.41306	114.333	8.71737	6.89425	9642	4.66674	39.2007	1.19422	97.154	0.205909	70.38	10.942	83.7718	0.760727	55.6751	16.749	8.54293	2
150700	2014	48.0978	99.7631	8.43304	126.727	9.15414	5.17704	10751	4.87867	39.6322	1.25579	89.709	0.212459	70.84	10.9551	84.4211	0.535251	56.7843	15.8973	8.88621	2
150700	2015	48.9548	100.034	8.43017	133.561	9.65003	4.41757	11632	4.89897	39.8595	1.36209	84.836	0.221399	71.52	11.0295	84.1143	0.524481	54.3904	17.6687	9.21392	2
150700	2016	50.3512	100.025	8.42804	130.001	9.83031	5.09827	12540	4.70239	39.9965	1.39635	77.3866	0.223175	72.13	11.0442	83.375	0.618712	51.6448	15.7153	9.72753	2
150700	2017	59.1507	99.7824	8.44642	99.7588	8.76623	6.08852	13581	3.84655	39.5395	1.47007	79.5327	0.237223	72.63	10.9199	86.3929	0.730876	51.171	18.7162	10.1777	2
150700	2018	57.6133	99.5938	11.0777	109.374	8.71174	7.06647	14895	4.20832	40.4565	1.52318	92.3547	0.242203	72.63	10.7984	87.9873	0.782861	56.8008	17.0002	11.3755	2
150700	2019	58.1264	99.5443	10.1131	105.189	9.15084	8.75595	16420	3.91441	40.7311	1.61854	94.9726	0.250189	73.06	10.7533	87.7839	0.951299	55.4217	16.889	12.2474	2
150700	2020	57.3277	99.9084	10.1224	106.604	9.47511	6.61658	17796	3.66893	40.6306	1.67617	95.7268	0.275792	73.86	10.7454	87.8883	0.825435	48.9416	15.9091	12.4123	2
150700	2021	56.7258	100.888	10.0333	109.442	10.0694	6.67095	19558	4.13525	41.9631	1.7362	93.6308	0.305239	74.76	10.9004	88.5836	0.692981	51.6021	15.8279	13.5321	2
150700	2022	55.6254	102.352	11.3549	81.6509	11.3417	5.12169	20908	3.97554	42.5233	1.95568	111.583	0.368545	74.83	11.0338	87.2751	0.679111	54.1374	16.8684	13.9691	2
150700	2023	54.5685	102.135	11.322	94.3142	12.852	6.81097	22434	4.02321	43.0686	2.01798	112.703	0.417045	75.76	11.0688	87.2147	0.707526	53.5322	24.938	15.0466	2
150800	2008	39.4387	100.861	46.0778	178.879	5.08643	6.46037	6927.76	7.52459	44.0052	2.62452	43.6596	0.11146	44.59	10.0746	47.9843	0.694108	63.1683	18.9924	11.4487	2
150800	2009	39.566	100.964	45.7467	175.669	6.21696	4.78174	7600.51	7.29694	43.6565	2.7527	43.5465	0.125959	45.85	10.2895	50.2213	0.50513	63.4226	17.8332	11.3373	2
150800	2010	39.5332	100.837	45.5095	173.43	7.35685	5.30778	8341.1	7.30821	43.8293	2.88877	49.4164	0.127793	48.35	10.3852	50.1118	0.673056	62.8691	18.4697	11.788	2
150800	2011	40.0857	100.82	40.5035	168.743	8.35691	4.09573	9156.62	7.34733	43.6033	3.11665	56.3036	0.117247	49.27	10.5574	49.3864	0.416238	60.9302	19.4372	11.5806	2
150800	2012	41.4526	100.446	44.7121	161.582	9.16266	4.19489	10054.9	7.42265	43.9556	3.16411	58.8527	0.140904	50.22	10.682	47.8015	0.483128	57.1797	18.8669	12.4428	2
150800	2013	41.8314	99.8911	49.1543	159.43	10.0368	6.55988	11044.8	8.14468	45.2911	3.38467	61.3266	0.156292	51.47	10.7271	47.6327	0.753417	56.8043	17.5657	14.081	2
150800	2014	43.4938	99.6442	49.3298	153.05	10.1231	5.05066	12481	8.08515	45.282	3.82625	67.8135	0.177595	52.57	10.7908	46.3249	0.626372	58.5675	21.0177	14.5212	2
150800	2015	45.4651	99.8848	49.3867	145.784	10.3907	6.28524	13479	7.93077	45.6815	3.67041	62.3355	0.172133	53.43	10.8356	45.0948	0.758059	57.7378	22.0981	15.2259	2
150800	2016	50.8962	99.9747	49.3992	129.546	9.72505	6.25572	14476	7.73878	45.8441	3.63849	53.3413	0.167295	54.17	10.8649	41.942	0.65782	54.2132	21.094	15.7245	2
150800	2017	55.9327	100.739	49.0368	116.372	9.27059	6.17216	15707	7.20092	45.9475	3.8039	49.4853	0.184234	54.86	10.8132	44.7422	0.689099	51.3233	20.9503	16.1484	2
150800	2018	55.2264	100.921	48.5892	116.137	9.08827	7.48286	17221	7.31038	46.7236	3.97739	59.9353	0.191686	54.86	10.7522	48.3016	0.841092	51.8295	19.0642	17.1615	2
150800	2019	55.2502	101.16	48.0305	114.117	9.62722	5.60727	19064	7.35667	47.0095	4.12325	65.3177	0.208539	55.6	10.8255	47.8323	0.612899	50.4428	18.3649	17.7105	2
150800	2020	55.3648	101.062	47.5257	112.052	9.81103	5.1712	20684	7.66749	47.6194	4.23872	81.5467	0.242521	59.97	10.8301	47.3684	0.610081	55.4227	18.5644	18.5416	2
150800	2021	54.6576	100.969	47.0711	111.78	10.4505	8.86826	22785	7.74883	48.7427	4.3761	54.0856	0.322096	60.6	10.9535	47.8547	1.07365	55.0606	19.3603	20.2779	2
150800	2022	53.9306	101.454	52.612	111.031	11.6981	7.92274	24403	7.83486	49.5186	4.54953	66.7646	0.377246	60.78	11.058	48.9251	0.957668	57.0263	20.0082	21.4052	2
150800	2023	53.5541	101.397	58.0168	109.642	13.0954	9.05439	26404	7.81313	50.3719	4.76935	76.981	0.398378	61.7	11.1226	49.3285	1.09619	58.975	26.9724	23.0462	2
150900	2008	82.252	99.4067	31.5678	52.6208	15.5674	4.30074	4490.07	2.23927	36.0039	2.43198	65.6464	0.0990978	33.69	9.6251	77.2017	0.473491	43.6768	12.0761	6.81728	2
150900	2009	82.9484	99.329	32.7591	58.7835	15.0063	4.01462	4901.88	1.13438	34.9637	2.56753	72.1999	0.228307	37.15	9.75605	78.5618	0.439301	38.0106	13.9578	6.55803	2
150900	2010	84.4394	100.18	33.7658	63.7721	14.1904	5.2607	5351.55	1.68071	36.2984	2.67856	71.6416	0.213209	39.83	9.89221	79.1917	0.551643	40.3007	14.7846	7.40785	2
150900	2011	85.6161	99.9499	48.1307	68.9765	13.485	4.36411	5842.56	1.65112	36.8942	2.79192	82.9964	0.275018	42.88	10.0814	78.7394	0.570054	40.3932	16.2466	8.66708	2
150900	2012	88.8832	98.979	36.4406	66.3364	13.7237	4.51496	6378.71	1.69111	36.1391	2.91525	86.3235	0.286318	43.58	10.2117	77.01	0.551792	37.4794	15.6507	8.04754	2
150900	2013	90.5103	99.2529	24.4366	66.2722	12.1174	4.33014	6964.18	2.35851	36.5786	2.99731	108.72	0.33258	44.32	10.2898	76.5684	0.49814	41.9095	14.1503	7.66633	2
150900	2014	92.6246	100.632	24.612	66.4887	12.2858	5.96653	7800	2.04187	37.3129	3.01899	113.015	0.304871	45.26	10.3591	74.9461	0.794745	45.4099	13.1694	8.33366	2
150900	2015	94.628	101.539	24.7567	66.03	11.9293	4.23919	8428	2.14268	37.7263	3.10194	108.385	0.293165	46.58	10.4153	73.0338	0.503152	46.3826	17.7074	8.4393	2
150900	2016	91.704	101.754	24.2923	68.6522	13.0152	5.53483	9085	2.19924	38.1603	2.65427	106.389	0.281203	47.85	10.4419	73.1236	0.608732	47.4053	13.487	8.95725	2
150900	2017	99.6285	101.61	22.9951	61.6172	13.578	5.75723	9848	2.06395	38.1573	2.74149	107.772	0.272453	49.01	10.3518	69.6915	0.588635	48.4268	15.5289	9.33987	2
150900	2018	91.7376	102.011	22.0953	57.5013	11.0114	4.57178	10764	2.35505	38.707	2.86701	113.048	0.304817	49.74	10.2475	69.635	0.604756	49.2152	18.2844	9.51606	2
150900	2019	87.9783	103.168	21.4207	54.5856	14.1167	4.84391	11970.5	2.73665	39.7523	3.008	125.338	0.315748	50.77	10.3102	67.0345	0.560655	48.4273	19.1181	10.2611	2
150900	2020	83.3991	103.323	20.3041	57.7401	14.799	8.33741	13009	2.7498	40.5372	3.03367	126.589	0.356316	59.69	10.3428	69.0188	0.911495	42.4448	17.9561	11.2824	2
150900	2021	80.8114	103.092	18.2577	55.6004	15.816	5.78079	14427	2.75625	40.2561	3.06703	141.187	0.388376	60.81	10.4412	69.5065	0.607064	41.9271	16.95	11.2911	2
150900	2022	80.4231	104.504	22.2532	54.3288	23.4544	8.23684	15581	2.56117	41.1748	3.13944	173.611	0.427968	60.95	10.5714	67.7614	1.07202	44.2524	18.2417	12.5976	2
150900	2023	79.2517	104.057	25.9814	53.4005	24.3529	5.90212	16984	2.77041	41.3415	3.19368	195.472	0.449785	61.94	10.6426	66.9843	0.619805	46.495	15.269	13.2299	2
210100	2008	45.9899	99.8477	17.627	184.629	17.3129	27.3335	8839.9	7.47757	45.4225	2.08827	66.7898	0.0150992	69.5	10.8987	78.8179	3.44042	43.2812	5.09407	14.0637	2
210100	2009	49.0379	99.908	17.6266	162.825	15.3217	29.5059	9412.33	6.77291	45.3158	2.18656	70.6389	0.198876	71.48	10.9949	78.4892	3.35437	43.6652	5.65771	14.4848	2
210100	2010	45.5535	99.7601	18.243	164.384	15.5296	31.6317	10022	5.74935	44.673	2.24284	80.5134	0.0273038	63.58	11.1523	84.3639	3.56029	44.604	5.11211	14.6989	2
210100	2011	51.0607	99.6071	20.1114	137.097	13.0103	33.2203	11575.5	8.00253	47.8754	2.3811	87.466	0.21216	73.21	11.3127	75.6459	3.79212	45.2705	4.62942	17.0798	2
210100	2012	51.1167	99.3915	19.9795	133.914	13.6345	33.8929	13045	7.96132	48.2	2.4993	93.1139	0.104374	63.45	11.4197	75.408	3.9649	44.9884	5.06292	17.9063	2
210100	2013	48.4903	99.3878	19.846	137.931	15.0543	35.2608	14467	7.44028	48.1517	2.64801	96.7716	0.146799	63.53	11.4973	81.9135	3.94375	44.9556	5.08844	18.5751	2
210100	2014	50.1489	99.5594	19.8053	135.161	13.3614	38.7447	12520.9	7.41974	48.325	2.74881	98.5286	0.114685	75.99	11.4839	74.8682	4.33854	43.6845	5.38657	18.2824	2
210100	2015	50.7972	99.4564	20.3696	133.748	12.8692	33.5385	13486.3	7.35591	47.7041	2.91552	106.982	0.145694	91.43	11.5086	76.9025	3.89947	43.4605	5.92311	17.8046	2
210100	2016	52.4098	99.4309	20.5426	127.14	12.4162	39.8657	14385	7.51104	49.1274	2.70718	109.063	0.189138	91.01	11.2327	75.9112	4.40454	45.6486	6.53699	19.5658	2
210100	2017	52.6017	99.5703	20.8002	130.316	11.6726	37.7487	15460.5	7.03381	48.6813	2.91633	113.057	0.188626	90.73	11.2707	81.2208	4.95795	46.3722	6.49172	19.5075	2
210100	2018	53.3733	99.8338	21.0333	128.763	11.7163	36.4988	16530	6.74424	48.5864	2.99945	117.9	0.255308	81	11.3427	80.7305	4.61668	46.4428	6.10543	19.7093	2
210100	2019	53.6645	99.8427	21.2652	123.677	11.2758	42.6698	18123.6	7.66143	50.9743	3.08666	131.117	0.303367	81	11.3572	80.2346	4.97971	46.5149	6.11812	22.1299	2
210100	2020	53.3732	99.9251	21.48	121.8	11.4109	38.431	19597.9	7.57575	50.6421	3.38485	147.436	0.437602	84.5	11.3669	79.9139	5.18899	47.0598	6.04067	22.0395	2
210100	2021	53.2643	100.24	21.627	119.151	11.4541	46.0387	21662.4	7.71822	52.6657	3.40423	161.847	0.506185	84.97	11.4591	80.1632	4.80547	46.3778	5.45984	24.5981	2
210100	2022	53.2139	100.398	21.7389	116.194	11.1779	46.4337	22352.4	7.21431	52.4646	3.52053	163.734	0.650733	84.99	11.5189	80.2198	4.89908	45.5062	5.44746	24.7941	2
210100	2023	53.268	100.183	21.8965	114.558	10.6348	47.005	24196.5	7.68048	53.4704	3.76045	165.452	0.737687	85.12	11.5674	80.2769	4.90633	45.885	6.69573	26.0518	2
210200	2008	42.2505	99.4431	13.5075	805.645	9.3819	16.2151	11215.7	5.6877	42.2379	3.97316	81.7296	0.0117341	60.1	11.0995	84.6519	1.99832	25.6177	5.27085	11.895	2
210200	2009	42.5664	99.4296	13.9868	869.607	9.55628	15.0995	11753.4	5.35054	41.8462	4.09451	84.78	0.0082268	61.26	11.2169	85.3782	1.87495	26.37	6.0666	11.8383	2
210200	2010	42.4458	99.3883	14.0729	880.522	11.4273	18.0307	12317	5.27748	42.277	4.21537	95.8107	0.00697651	62.42	11.3846	85.006	1.94437	26.3681	5.7175	12.6431	2
210200	2011	42.4179	99.3801	20.5737	876.121	12.9856	18.7281	14213.5	5.83212	43.7078	4.38801	110.486	0.0319302	63.58	11.5571	85.0266	2.38051	26.3541	6.02928	14.5178	2
210200	2012	42.3707	99.3482	14.8155	881.129	15.0396	19.4237	15989.6	5.66934	43.7252	4.60508	126.979	0.06623	64.74	11.6838	84.6982	2.36702	26.9082	6.33484	14.9837	2
210200	2013	42.9858	98.8845	9.02304	885.035	14.8822	19.8816	17717	5.79956	43.9226	4.79503	130.475	0.122628	65.9	11.7702	84.0571	2.48423	26.8117	6.50625	15.5158	2
210200	2014	42.776	98.6001	9.60559	913.012	14.7742	21.0004	13547.4	4.0462	41.0728	5.01256	119.345	0.193424	67.05	11.7661	84.3338	2.35074	24.1281	4.14176	12.855	2
210200	2015	43.6957	97.3708	10.0146	911.657	14.8476	19.1326	14666.7	3.47993	39.989	5.30029	136.868	0.294888	71.03	11.7773	83.4086	2.54489	25.6685	6.51435	12.8102	2
210200	2016	45.8257	97.0859	10.4708	844.301	14.2521	24.9627	15664	4.91433	42.6313	3.46941	166.791	0.334741	75	11.6463	82.8211	2.70073	29.2021	6.75378	15.1529	2
210200	2017	44.092	98.1596	10.817	876.76	14.802	22.7989	16864.9	5.1075	43.2295	3.39396	135.861	0.36122	72	11.674	84.3431	2.44204	26.9607	5.21074	15.4632	2
210200	2018	45.4874	99.4937	10.6324	586.931	15.5472	24.45	18103.4	4.18654	43.4416	3.35276	158.735	0.38589	78.3	11.7667	83.4811	3.067	29.2301	4.09438	16.0087	2
210200	2019	45.2146	99.4829	10.4468	567.841	15.0204	24.2179	19974.4	4.50069	44.2387	3.4019	173.569	0.452954	64.63	11.669	83.831	2.84767	30.1216	4.25689	17.0284	2
210200	2020	46.5242	99.7463	10.2318	567.947	15.3093	22.6143	21558	4.79812	44.8085	3.47865	184.552	0.492503	82.35	11.6689	83.2235	2.69548	30.5135	4.20715	17.668	2
210200	2021	47.1159	100.617	9.92912	554.46	15.7932	25.6409	23762.9	4.94806	46.3535	3.52191	207.004	0.490419	82.65	11.772	81.9372	3.08769	30.1433	3.77692	19.423	2
210200	2022	46.7157	101.654	9.53147	525.695	16.6379	24.3265	24759.1	5.04696	46.8914	3.53639	228.822	0.605413	82.85	11.8382	81.537	2.82256	29.6723	3.98172	19.7077	2
210200	2023	46.5545	101.027	9.20088	486.245	17.4879	26.1791	26430.4	5.10809	47.3776	3.57717	245.813	0.732894	82.93	11.8698	81.2134	3.1525	29.5047	3.91366	20.8751	2
210300	2008	55.7931	100.032	19.6288	15.7024	9.05504	18.3841	7450.01	6.8883	43.6854	3.37116	63.4005	0.0321456	50.42	10.731	84.1688	2.01774	41.887	4.57375	11.7402	2
210300	2009	56.5054	99.9043	19.3553	15.1182	8.79029	17.144	8350.01	6.52051	43.2911	3.37439	69.421	0.0806545	50.43	10.8028	84.4011	2.05714	41.6569	5.04294	11.7688	2
210300	2010	56.7525	99.7626	19.9896	14.6878	8.61398	16.5889	9250	4.92162	41.7451	3.38242	76.4637	0.0790884	67.17	11.0088	83.5981	1.95164	42.0633	5.77367	11.4152	2
210300	2011	57.5243	99.575	24.9957	14.156	8.37727	19.2148	11146.2	6.85338	44.861	3.39685	93.5091	0.0970358	50.17	11.1306	83.5957	2.38624	43.629	5.12532	14.1886	2
210300	2012	57.6901	99.5243	20.8304	13.7854	8.23543	17.9614	12617.3	6.14489	44.0915	3.41309	108.321	0.131455	48.56	11.1466	83.6395	2.39279	45.0887	6.83127	14.0125	2
210300	2013	57.2813	99.3597	16.6522	13.5704	8.18781	21.3275	14207	6.72219	45.3713	3.43508	114.15	0.164874	48.45	11.2251	83.4845	2.23068	44.524	6.44984	15.3603	2
210300	2014	57.9303	99.7331	17.0709	13.055	7.95927	21.6943	12092.6	5.59405	43.8823	3.44427	110.341	0.177319	74.67	11.1349	83.6972	2.54577	43.5649	4.81835	13.8983	2
210300	2015	58.3642	99.7009	17.129	12.5992	7.76603	22.5436	13116.9	6.406	45.1368	3.4546	107.031	0.227619	75.29	11.1204	84.1287	2.83703	44.6071	6.49608	14.9642	2
210300	2016	57.1376	99.7981	17.1706	12.4888	7.78733	20.5501	14161	6.64175	45.3782	3.46159	84.8826	0.246717	75.27	10.6514	84.7967	2.56409	52.2243	7.29798	15.2051	2
210300	2017	58.7646	99.712	17.2225	11.7813	7.43613	21.046	15075.2	6.58422	45.6288	3.47159	76.7258	0.29668	75.58	10.7556	86.2615	2.60992	51.02	6.69366	15.7587	2
210300	2018	59.0611	99.6585	17.2815	11.3661	7.26694	25.1924	16137.4	6.04878	45.9883	3.48349	82.1935	0.352524	75.97	10.8435	85.8906	2.88169	50.9012	7.12967	16.8318	2
210300	2019	59.6204	99.0814	17.4417	10.9678	7.10833	25.3909	17759.3	6.4814	46.6764	3.51578	87.2606	0.503666	72.9	10.8459	85.968	2.94522	49.7523	7.46047	17.8905	2
210300	2020	59.0114	99.0114	17.6159	10.7875	7.09302	23.0238	19064.8	6.38719	46.5241	3.55089	93.2277	0.672455	74.6	10.8528	85.413	2.68828	48.1647	7.351	18.0531	2
210300	2021	61.1092	99.8582	17.6409	10.0411	6.70415	25.0803	21038.2	6.39341	47.7574	3.50717	106.676	0.789302	75.04	10.9455	82.8693	3.06417	49.534	7.9696	19.4935	2
210300	2022	59.7787	101.199	17.4319	9.74815	6.61549	24.074	21833.7	6.37288	48.3312	3.5138	107.144	0.811746	75.05	10.9382	83.992	3.00136	49.198	7.92652	19.6888	2
210300	2023	59.49	101.15	17.2336	9.29183	6.41634	25.6067	23464.5	6.45689	49.0655	3.47383	110.666	0.907258	75.81	11.0185	84.0233	3.12849	49.3591	8.66147	20.8115	2
210400	2008	56.6096	98.6047	20.8502	104.567	8.25028	19.1632	5336.56	6.20147	42.0173	2.33964	96.7692	0.0116761	65.99	10.2982	84.8254	2.15912	38.0103	6.27865	10.5829	2
210400	2009	57.6897	98.5614	21.1546	100.959	7.69629	15.4327	6180	5.27383	40.7092	2.6824	101.716	0.0817811	65.77	10.3541	85.0733	2.11668	37.4579	6.99232	9.90517	2
210400	2010	58.9428	97.8741	22.1226	97.8119	7.1786	17.6657	7203	5.31504	41.1643	3.02902	119.359	0.061384	71.66	10.6096	84.9008	2.04395	38.4827	7.38312	10.941	2
210400	2011	61.8383	97.3901	31.8121	92.6499	6.51917	20.5459	8779.93	6.80231	43.9078	3.40628	157.52	0.0997392	65.65	10.8314	83.4234	2.24143	40.7862	7.1961	13.8079	2
210400	2012	62.7132	98.0555	25.1896	90.0713	6.0462	21.7076	10061.9	6.82588	44.4355	3.90519	183.124	0.169937	68.32	10.9398	83.7381	2.2923	39.3183	8.79329	14.168	2
210400	2013	67.1418	100.773	17.7988	80.6139	5.13184	18.7307	11310	6.70053	45.0107	4.17014	202.935	0.202297	68.02	11.0266	77.4813	2.42218	39.4788	10.7834	13.7119	2
210400	2014	64.8877	103.612	18.9175	77.6387	4.65336	21.2202	10971.4	5.32865	45.1221	4.02798	201.594	0.190093	72.03	10.9805	77.252	2.23204	38.9647	9.38391	13.5027	2
210400	2015	60.6595	102.506	20.112	78.0281	4.36387	20.549	11766.5	6.23053	45.7528	3.93268	212.489	0.270781	72.51	10.9399	80.0591	2.48847	38.2806	9.70177	14.1934	2
210400	2016	56.9462	101.453	21.315	78.7839	4.06511	23.2275	12545	6.34286	46.1047	3.87947	130.486	0.285737	72.77	10.6025	82.5424	2.86817	36.758	10.2813	15.15	2
210400	2017	60.048	101.409	18.0299	70.7378	3.3183	22.3713	13379.2	6.53318	46.2667	3.99482	178.737	0.33037	73.99	10.7148	85.0757	2.71668	54.439	10.0828	15.2756	2
210400	2018	59.9829	101.753	16.2315	66.0856	3.30428	23.0765	14249.1	6.07847	46.1867	4.00678	158.115	0.395878	74.68	10.8234	86.038	2.74455	47.6654	9.5996	15.4908	2
210400	2019	60.4928	99.5972	14.8035	60.284	3.44746	23.5878	15595.5	6.77469	46.3796	4.18524	164.766	0.442147	69.33	10.6193	86.4153	2.72694	48.2713	11.281	16.419	2
210400	2020	65.9583	98.9417	13.4521	58.9689	3.29068	28.6337	16813	6.88706	47.3135	4.25895	195.25	0.688619	78.3	10.6112	87.1517	2.94897	58.7814	10.7491	17.9987	2
210400	2021	66.7224	99.5414	11.9974	61.0022	3.22077	22.8952	18476.9	6.92831	47.0783	4.38517	208.62	0.579327	78.5	10.6755	87.618	2.7389	60.3966	10.9573	17.6737	2
210400	2022	65.1299	102.549	10.2203	60.1915	3.08539	23.5824	19214.1	7.11797	48.7434	4.37539	214.551	0.743674	78.73	10.7501	87.8772	2.97769	59.4284	9.04873	18.172	2
210400	2023	63.839	102.525	8.526	59.151	2.93878	23.3757	20933.8	7.23911	49.1956	4.34371	212.769	0.929104	79.57	10.7833	87.8573	2.79639	59.8019	11.6169	18.8879	2
210500	2008	77.2844	98.1134	25.8158	159.714	8.87411	17.5473	6449.13	5.3624	41.3019	6.2966	153.34	0.0134157	66.97	10.5775	82.5925	1.92449	33.232	6.82719	11.1828	2
210500	2009	77.7557	97.878	26.606	158.471	8.81384	15.1581	7109.53	4.55446	40.1988	6.69827	173.394	0.105553	66.84	10.6983	83.196	1.82331	32.8312	7.76541	10.7477	2
210500	2010	78.592	97.632	26.5297	156.821	8.73122	15.3794	7845	4.33134	40.0958	6.96372	209.587	0.0229609	74.33	10.9269	83.6394	1.92054	34.9387	7.83901	11.0537	2
210500	2011	80.387	96.4287	33.8257	155.179	8.64929	19.1025	9524.07	6.02985	42.7697	7.32844	243.509	0.0959256	75.92	11.1228	85.0542	2.06294	33.0719	6.89292	13.9942	2
210500	2012	84.0318	96.0998	29.8748	150.672	8.40775	21.5237	10800.2	5.40957	42.5415	7.99966	266.893	0.262785	67.6	11.1928	84.1281	2.44333	32.5121	7.1898	14.5264	2
210500	2013	85.2784	96.8613	25.3467	149.414	8.34762	17.4894	12204	5.82609	42.8212	8.62577	287.208	0.364852	67.66	11.2693	84.7617	2.06189	31.9098	7.47651	14.3296	2
210500	2014	85.8495	99.2496	25.288	145.672	8.14891	22.7795	11725.7	4.82773	43.4879	8.01829	291.022	0.345666	67.69	11.2523	85.1432	2.80033	31.5322	7.05739	14.6941	2
210500	2015	87.2615	99.8334	25.3302	139.74	7.82756	21.0175	12667.3	6.5682	45.5532	7.35785	310.462	0.42812	72.5	11.2519	85.2747	2.32859	31.884	9.89373	15.6931	2
210500	2016	84.1581	101.689	25.156	138.597	7.77452	22.6905	13574	6.60552	46.8419	6.57299	295.469	0.445816	72.8	10.8418	85.5197	2.97277	29.9438	7.49522	16.4656	2
210500	2017	84.2116	102.469	24.6632	126.658	7.41426	19.3995	14540.2	6.65627	46.9521	5.76796	207.823	0.468204	71	10.8687	86.2811	2.59344	29.134	7.55637	16.332	2
210500	2018	80.6214	102.276	22.7025	124.924	6.93681	22.9249	15463.3	6.292	47.19	5.73929	223.375	0.519527	70.83	10.9398	85.8516	2.71077	28.8533	7.60005	17.0627	2
210500	2019	82.8894	98.4162	21.6331	114.013	7.22892	22.8869	16969.6	6.6287	46.2741	5.91043	230.195	0.58401	78.39	10.8942	84.9143	3.03081	28.2271	7.034	17.8097	2
210500	2020	86.8866	96.889	20.847	116.531	6.56642	27.8569	18335.5	6.63288	46.798	6.18005	263.981	0.971939	79.4	10.9445	84.0602	3.10011	28.7236	7.00751	19.3964	2
210500	2021	89.9417	97.9751	19.7664	108.573	6.14498	25.8799	20215.3	6.85149	47.6508	6.38631	288.055	0.984025	79.81	11.0573	83.196	3.09745	31.4434	6.49929	20.058	2
210500	2022	86.8043	103.239	17.6824	109.306	5.20833	27.6931	20942.3	6.81496	50.2055	6.34527	295.902	1.55984	79.86	11.105	83.9947	2.87837	29.2704	7.32396	20.67	2
210500	2023	83.132	104.918	15.4582	109.12	4.22906	26.423	22406.2	6.71507	50.8988	6.22157	294.24	1.86346	80	11.1561	83.8572	3.16246	28.9731	7.46566	20.9169	2
210600	2008	56.9828	99.3172	19.6096	458.966	3.37106	16.7166	7212.49	5.55792	41.8249	4.05201	58.9038	0.00961852	74.06	10.0533	80.3152	2.02476	34.2997	9.56904	10.6812	2
210600	2009	57.924	98.9126	19.9291	452.18	3.75061	17.8599	7755.47	5.33213	41.7475	4.26575	63.1973	0.0232989	73.34	10.1281	80.3493	1.92258	33.0861	15.8868	11.0938	2
210600	2010	58.9297	98.6272	20.1837	446.373	4.13443	17.5117	8340	4.30631	40.6544	4.72991	70.7723	0.0154733	60.33	10.3156	80.5126	2.25494	32.7702	14.36	10.868	2
210600	2011	60.2801	97.9442	25.8967	441.265	4.52242	20.6003	10033	5.9827	43.3261	5.24247	98.4981	0.0319744	59.61	10.5149	80.3514	2.2786	34.6117	11.806	13.5612	2
210600	2012	61.4532	98.0059	24.7256	437.376	4.92247	17.8387	11427.6	5.75435	42.9776	5.60741	100.338	0.0896224	58.88	10.6506	79.9188	2.0681	33.8684	12.0522	13.5532	2
210600	2013	62.0426	97.94	23.5119	438.013	5.37887	17.6801	12822	5.90012	43.3679	6.03179	104.77	0.138974	58.16	10.7406	79.4323	2.08089	33.9093	13.3791	14.1968	2
210600	2014	62.8334	98.5823	24.3419	434.392	5.7888	22.5369	11528.4	6.24287	44.447	5.68732	106.412	0.145953	57.44	10.6619	78.9783	2.30021	34.081	14.269	14.7297	2
210600	2015	64.0426	98.6448	24.6764	427.741	6.15662	20.3441	12492.8	6.47644	44.6351	5.32831	122.264	0.225039	65.7	10.63	78.7998	2.744	34.5428	13.018	14.956	2
210600	2016	59.6877	99.4527	24.878	456.832	7.07272	23.3476	13450	6.05687	45.1889	4.91808	88.4244	0.249688	66.63	10.3598	84.3844	2.76434	29.0988	14.8389	15.7709	2
210600	2017	64.98	99.8472	25.5971	415.995	6.90271	24.6458	14469.1	6.05729	45.9118	4.48539	98.819	0.358988	67.2	10.419	86.0062	2.73268	32.5809	13.8134	16.6864	2
210600	2018	65.6849	100.002	25.1164	407.296	7.22034	25.6017	15438.8	5.95657	46.2444	4.4696	117.711	0.353456	68	10.4603	85.373	2.70477	33.6385	12.7966	17.2814	2
210600	2019	65.9664	99.3782	24.7903	403.861	7.62712	24.1521	16954.3	6.36308	46.5484	4.73128	131.906	0.429858	68.8	10.4031	85.5836	3.14471	34.6866	12.9126	17.9161	2
210600	2020	66.6331	99.4212	24.4486	397.931	7.9857	25.6993	18439	6.36866	47.1778	4.84143	143.386	0.564769	68.9	10.4259	85.4827	3.29855	34.2611	13.0391	18.9381	2
210600	2021	66.6934	99.9811	23.967	393.433	8.37065	26.5507	20217.6	6.43243	48.0394	4.92178	185.102	0.62925	69.3	10.5265	85.5598	3.09991	38.4993	10.9247	19.9954	2
210600	2022	65.9638	101.829	23.0593	386.458	8.69915	28.8921	20901.6	6.53003	49.3981	4.92701	209.193	0.622163	69.47	10.5777	85.052	3.0939	38.1085	13.4574	20.7906	2
210600	2023	65.2457	101.794	22.1839	379.67	9.02514	27.108	22669.9	6.65358	49.6365	4.93213	220.537	0.864272	70.3	10.6361	84.98	3.16497	37.2739	13.066	21.3098	2
210700	2008	49.1427	99.6048	21.0877	194.619	7.99019	17.0481	5862.87	6.35447	42.3541	2.59387	63.2271	0.0209078	39.77	10.0105	78.2481	1.90784	39.0032	9.20828	10.4386	2
210700	2009	50.6491	99.7634	22.3484	194.357	8.25767	18.6563	6725.99	5.50071	42.0633	2.77389	61.4637	0.0119092	40.04	10.0625	80.9414	2.21248	37.5828	13.3998	10.907	2
210700	2010	51.949	99.826	23.0025	194.784	8.54044	16.0814	7756	5.41264	41.8896	2.95675	65.3365	0.00637275	47.86	10.2954	78.8069	1.92391	38.0858	14.4982	10.9707	2
210700	2011	53.0328	99.9247	30.3394	195.809	8.83821	17.7806	9446.81	7.28048	44.9487	3.13713	73.5189	0.00227353	40.64	10.4976	77.8174	2.16063	37.2381	13.4863	13.6408	2
210700	2012	52.9554	99.8247	24.3765	201.317	9.33418	19.8248	10788.5	7.60782	45.61	3.24296	77.6225	0.0153821	40.56	10.6056	78.959	2.23092	36.6098	16.3795	14.3568	2
210700	2013	52.4176	99.8451	18.3889	208.355	10.2079	19.3341	12137	7.19247	45.1245	3.33362	81.1655	0.108754	41.04	10.6912	78.7168	2.49817	36.2245	14.1054	14.2406	2
210700	2014	52.7915	99.7415	19.8603	210.388	9.73844	19.5833	11722.8	5.31758	43.1408	3.17549	85.2201	0.152054	53.81	10.7072	79.537	2.38959	36.7599	16.8258	13.3247	2
210700	2015	54.2762	99.5831	21.4179	200.167	9.34084	18.6127	12599.2	5.74957	43.7105	3.02131	99.3226	0.249099	54.66	10.689	79.6793	2.48734	38.5563	16.6536	13.9316	2
210700	2016	54.1189	99.4877	22.3557	197.092	8.85303	21.1077	13539	6.82566	45.505	2.86854	100.94	0.246274	54.63	10.44	80.0227	2.69787	40.6914	18.8604	15.4518	2
210700	2017	53.3675	99.6888	23.5144	196.67	8.96076	20.2356	14492.8	6.90486	45.8317	2.70863	80.2913	0.267146	55.59	10.5024	78.3743	2.75582	38.1577	17.7682	15.8892	2
210700	2018	53.399	99.8454	23.935	176.943	9.22471	25.2415	15384.1	5.95274	45.9332	2.83176	90.6347	0.291001	56.26	10.6071	78.4182	2.98857	43.4322	15.1432	16.8746	2
210700	2019	54.406	99.8411	24.3578	167.266	8.83474	22.8763	16817	7.24362	47.3357	2.95658	98.4405	0.368965	42.93	10.5084	77.201	2.80422	42.7124	13.8736	17.802	2
210700	2020	56.2024	99.9172	24.7631	160.548	8.76324	22.6729	18188.2	6.18431	46.6207	3.08301	106.476	0.466351	59.7	10.516	77.0184	2.64966	40.2978	14.0245	18.0175	2
210700	2021	56.6473	100.368	25.0559	157.74	8.67638	24.0887	20009.8	7.19206	48.5874	3.25226	120.826	0.463762	60.49	10.5932	76.2298	3.02248	43.2176	10.4484	19.7142	2
210700	2022	55.4175	101.089	25.1654	158.486	8.83498	29.0753	20750.5	6.94461	49.5974	3.34999	131.783	0.637531	42.6	10.6461	77.4039	3.35114	43.3911	13.6399	20.9205	2
210700	2023	55.7403	100.897	25.318	158	8.70337	24.5943	22400.2	7.13862	49.4642	3.68939	141.745	0.764465	61.34	10.6946	76.7628	3.08592	46.0473	13.0697	21.0011	2
210800	2008	59.1648	99.6794	47.2131	163.319	6.73352	17.0458	7617.08	7.56923	45.5145	5.26137	61.2069	0.0821646	46.33	10.312	86.5743	1.93493	35.8695	6.30781	14.2108	2
210800	2009	59.4447	99.4231	47.4871	165.954	7.06472	19.3588	8216.22	7.5334	45.8903	5.46838	65.0561	0.183882	46.89	10.4345	86.4889	2.21314	34.7322	6.55181	14.9513	2
210800	2010	59.7849	99.0774	46.4147	169.015	7.41511	16.8625	8863	6.98758	44.8846	5.72277	75.5241	0.11717	58.86	10.6587	86.1731	2.10052	35.2619	7.22852	14.4533	2
210800	2011	59.826	98.7279	54.4835	173.575	7.83464	17.0188	10661.7	8.03103	46.7007	6.00259	87.0343	0.105715	48.23	10.859	86.1219	2.17221	34.7239	6.43736	16.528	2
210800	2012	60.0007	98.8086	47.5741	177.679	8.23816	17.2192	12080	7.43438	46.1591	6.34285	104.081	0.209114	47	10.981	86.0866	2.17441	35.6741	6.58556	16.4306	2
210800	2013	58.068	99.28	40.2979	188.081	9.21457	18.2529	13675	7.58976	46.6875	6.56231	107.887	0.219496	46.95	11.0834	84.789	2.29527	35.3947	6.46573	16.8771	2
210800	2014	60.3591	100.383	40.4351	184.011	8.51747	21.2076	12608.7	7.13526	46.9098	6.16469	108.285	0.145042	67.25	11.1015	85.4676	2.76499	35.4632	5.55408	16.7709	2
210800	2015	60.4122	99.6215	40.5887	179.836	8.3921	21.817	13631.3	7.34559	47.1914	5.81408	114.637	0.243995	67.4	11.0833	85.7442	2.54073	36.4775	7.98027	17.489	2
210800	2016	60.7173	99.2437	41.1199	175.673	7.89094	21.4037	14587	7.32541	47.2498	5.4815	100.215	0.22649	67.27	10.8122	85.3148	2.34549	35.4559	7.2176	17.918	2
210800	2017	60.7968	99.0661	42.0341	172.638	7.86577	23.4249	15593.7	7.29272	47.7701	5.15274	107.109	0.264078	67.69	10.9108	85.8867	2.81011	35.9364	7.0287	18.8604	2
210800	2018	64.1737	99.2412	42.4006	147.234	7.67589	26.4274	16747.9	7.21784	48.5936	5.32759	125.503	0.26209	64.78	10.9734	85.7884	3.06226	38.141	6.85444	20.0631	2
210800	2019	65.7858	98.476	43.1026	138.332	7.30649	21.9562	18494.5	7.70288	48.6015	5.54758	133.938	0.325691	64.79	10.9594	84.9116	2.57397	38.4459	7.59567	20.3822	2
210800	2020	65.0638	98.2118	43.9341	138.682	7.56972	24.3418	20201.9	8.09901	49.7532	5.78864	145.592	0.511408	67.2	10.9636	83.6951	3.06955	38.106	7.85067	21.9226	2
210800	2021	65.5979	99.7196	44.1045	136.217	7.49251	24.4935	22127.6	8.03084	50.8557	5.94536	155.298	0.576454	67.72	11.0274	83.3095	3.06344	36.784	6.69652	22.9473	2
210800	2022	64.6524	102.006	43.2832	135.848	7.57301	27.2113	22858.1	8.10571	52.4574	5.96615	156.253	0.734238	67.75	11.0522	83.0967	3.16149	34.5002	7.70998	23.8422	2
210800	2023	63.3628	101.908	42.5177	138.992	7.65635	25.0075	24862.9	8.18172	52.6261	5.98952	162.805	1.21434	68.56	11.0883	82.6226	3.12774	34.5204	7.15653	24.3756	2
210900	2008	38.4434	99.7302	7.46211	248.416	10.1965	18.0429	4587.9	7.39781	42.4796	1.73435	46.5514	0.00727379	44.76	9.4054	71.0176	2.01928	48.5643	10.0889	9.17806	2
210900	2009	42.03	99.8069	7.87887	233.909	9.93708	18.2121	5394.31	4.66237	39.9406	1.85441	42.2498	0.0133877	44.63	9.61429	70	2.04272	40.0102	9.69823	8.42536	2
210900	2010	46.4231	99.87	8.09905	217.717	9.54565	18.4043	6372	7.9903	43.8029	2.04096	63.2746	0.00498818	44.88	9.88805	62.1447	2.34256	48.3654	9.99771	10.6088	2
210900	2011	55.348	99.8642	13.1491	187.618	8.4685	17.435	7614.54	7.41817	43.7325	2.22812	68.6152	0.0122121	45.13	10.1267	60.9987	2.21758	46.176	9.07456	11.3453	2
210900	2012	53.1751	99.8773	11.4915	200.486	9.29562	18.948	8772.48	8.59639	45.3799	2.37187	72.8107	0.0181102	48.09	10.2828	58.7877	2.43636	45.944	11.8393	12.5909	2
210900	2013	50.0674	100.158	9.80235	218.135	10.687	21.7608	9939	8.47418	45.9478	2.46199	75.7582	0.0183119	48.55	10.3794	59.1006	2.55945	46.2249	14.7978	13.4643	2
210900	2014	48.4922	100.192	12.7827	229.041	10.6018	21.6057	10566.3	5.98612	43.6298	2.41437	55.0835	0.0298719	44.9	10.3652	64.0874	2.50811	38.4252	14.352	12.7995	2
210900	2015	47.8555	99.8384	13.8938	227.023	10.5941	24.0434	11109.1	4.50078	42.5014	2.37532	46.6962	0.069864	46.6	10.2305	65.6347	2.86211	33.5973	17.1955	12.9055	2
210900	2016	48.1396	99.6113	14.5054	221.572	9.95264	24.4314	11812	5.24372	43.4928	2.34145	56.7779	0.127991	46.8	9.97941	67.6193	2.85977	40.9221	22.2378	13.7289	2
210900	2017	47.0964	99.8248	15.236	222.858	10.1539	22.2406	12547.9	5.42902	43.6441	2.30235	58.6999	0.14229	46.9	9.99855	75.6061	2.63677	42.9517	20.3202	13.8176	2
210900	2018	48.0264	100.246	15.7666	196.737	10.2567	26.6951	13443.5	5.58215	44.9491	2.48878	64.4994	0.172137	42.4	10.0903	74.031	2.81793	43.9475	16.1123	15.2518	2
210900	2019	47.1661	100.46	16.2598	192.941	10.1909	23.1956	14849	6.93216	46.2945	2.56728	71.2011	0.199749	42.5	10.1857	75.6777	2.69625	43.3539	17.1659	15.9587	2
210900	2020	47.1053	100.511	16.7397	191.553	10.4556	21.2283	16182.7	5.98728	45.3769	2.71325	68.9147	0.222725	61.65	10.2309	76.9453	2.49239	37.012	18.4461	15.849	2
210900	2021	46.5405	100.603	17.1986	191.995	10.5605	27.1598	17933	7.23223	48.1259	2.82056	77.2148	0.230361	61.79	10.3182	77.9049	3.03873	38.1743	15.8031	18.4629	2
210900	2022	44.949	100.91	17.5976	195.397	10.8926	24.0512	18634.6	6.93713	47.6333	2.90761	75.2783	0.48072	62.33	10.3825	80.2627	2.7815	34.9342	16.0188	18.1009	2
210900	2023	45.44	100.578	18.0473	193.815	10.6762	27.7298	20252.4	7.20507	48.8138	2.99313	77.7419	0.517232	62.96	10.4288	80.0763	3.10251	35.5183	17.8614	19.7685	2
211000	2008	64.8289	99.7407	39.4483	149.992	6.17229	15.4934	7040.8	6.65785	43.8777	2.41754	50.1413	0.0283453	43.66	10.3384	88.1461	1.91205	39.2664	7.34438	12.6587	2
211000	2009	65.725	99.9272	39.477	151.071	6.42542	15.439	7549.39	6.56706	43.9806	2.58361	55.2109	0.0569	43.68	10.4088	87.7238	1.95545	38.9698	6.91569	12.8825	2
211000	2010	69.0403	99.824	39.6477	146.946	6.44507	19.1656	8095	4.94729	42.9981	2.66479	61.4391	0.0282476	55.89	10.5996	86.7683	2.32047	37.204	6.59308	13.1669	2
211000	2011	69.011	99.6093	54.1514	150.473	6.79189	21.0831	9843.52	7.00323	46.5108	2.75216	74.3449	0.074129	43.77	10.7939	87.0966	2.51497	37.3419	6.43087	16.5584	2
211000	2012	70.1062	99.2758	41.741	152.067	7.05066	18.7651	11182.8	6.50903	45.2334	2.97147	95.1889	0.112856	42.56	10.924	85.7724	2.37056	37.746	7.45937	15.5438	2
211000	2013	69.3263	99.2274	29.1609	157.537	7.71815	19.9223	12379	7.30703	45.8988	3.09371	103.155	0.173284	42.47	11.0021	86.1068	2.39636	42.6917	7.46175	15.6846	2
211000	2014	68.4487	99.4331	31.2429	162.263	7.51083	19.4413	11156.2	6.69154	45.0466	3.17056	115.473	17.3279	63.2	10.9402	86.1762	2.28046	45.6224	7.90595	14.8555	2
211000	2015	81.0592	99.5493	31.406	134.029	6.25451	23.6969	12035.5	7.14016	46.6176	3.24441	135.608	0.147711	63.73	10.9591	73.5911	2.47945	49.7895	9.60602	16.5422	2
211000	2016	70.6205	99.9106	31.6293	151.039	6.78438	24.5258	12969	7.20183	47.124	3.30685	134.351	0.19899	63.81	10.5063	83.3344	2.60209	50.948	9.43307	17.0466	2
211000	2017	67.8432	99.899	31.9045	154.707	7.04881	20.7056	13920.7	7.43455	46.9949	3.3698	164.19	0.244962	64.48	10.6713	86.5519	2.34246	59.8419	9.01536	16.884	2
211000	2018	68.976	99.8623	32.566	136.984	7.14148	22.9369	14872.7	7.64832	47.8438	3.46576	183.883	0.321137	62.42	10.8137	85.4369	2.57753	62.4574	9.27621	17.9555	2
211000	2019	69.0691	99.3363	33.4052	131.756	6.95916	23.1546	16246.9	7.84137	48.2723	3.55458	197.606	0.45763	62.41	10.7739	84.9411	3.13919	62.809	10.1198	18.8309	2
211000	2020	69.4533	99.491	34.2009	129.917	7.09131	24.1904	17666.2	8.08742	49.1655	3.59916	223.323	0.579122	67.79	10.791	84.9287	3.03438	63.9753	10.7661	19.9286	2
211000	2021	70.0087	100.244	34.741	127.635	7.02046	24.3859	19403.8	8.12528	50.0393	3.6387	249.794	0.483389	67.6	10.8256	84.0752	2.82181	65.3102	9.78251	20.9272	2
211000	2022	69.1421	101.234	34.9331	127.027	7.08126	28.2538	19952	8.17839	51.2614	3.75042	254.532	0.748913	67.71	10.868	84.7181	3.18379	63.3826	9.54083	21.9872	2
211000	2023	69.0525	101.43	35.0477	127.54	7.0255	24.8978	21380.9	8.26379	51.287	4.03953	263.588	0.883824	68.4	10.8587	83.9668	2.88104	63.4483	7.56487	22.12	2
211100	2008	42.1719	99.8102	32.5952	134.54	9.31556	15.5072	8532.42	9.00158	46.1411	1.94165	114.918	0.0179805	81.04	10.8637	89.5289	1.82718	48.0198	10.519	13.5611	2
211100	2009	42.7023	99.6966	32.6944	138.51	9.78151	17.7553	9120.86	8.96633	46.5507	2.03759	117.923	0.0494543	82.13	10.8602	89.74	2.18429	45.615	11.8873	14.2779	2
211100	2010	43.7947	99.5614	32.8385	145.619	10.1218	17.4077	9750	8.14729	45.7428	2.12493	120.958	0.0146183	65.95	11.1645	88.7818	1.96384	44.1496	12.8894	14.1682	2
211100	2011	43.9256	99.6401	38.1691	144.585	10.6706	20.2856	11436.8	8.93149	47.7275	2.22033	135.054	0.082854	82.65	11.3546	88.3617	2.38324	42.4295	9.6514	16.3681	2
211100	2012	43.8386	99.6465	33.6417	150.929	11.2753	20.2467	12935.2	8.50416	47.4201	2.31928	161.199	0.131385	75.01	11.4789	88.2349	2.27117	41.5154	10.6624	16.5346	2
211100	2013	44.2655	99.6528	29.0798	150.398	12.0878	17.5562	14462	8.59229	47.2374	2.40961	170.754	0.135163	74.94	11.5592	88.1426	2.30637	41.1629	10.3844	16.4611	2
211100	2014	43.9264	99.6692	29.1763	151.369	11.7038	21.4736	12723.4	8.88056	47.7259	2.46039	173.499	0.130447	80.03	11.5221	88.1367	2.56377	41.2857	9.56784	16.4717	2
211100	2015	43.7566	99.501	29.5407	151.556	11.5865	20.6306	13763.5	8.97616	47.9182	2.49116	178.688	0.180494	80.17	11.4825	88.0379	2.42607	41.6387	11.6329	16.8997	2
211100	2016	44.1895	99.3956	30.3384	137.959	10.8423	21.5473	14845	8.91836	48.32	1.8975	188.932	0.307525	79.82	11.2577	87.2858	2.54281	42.5505	10.0359	17.6577	2
211100	2017	43.0169	99.3207	30.5459	113.403	11.1169	24.0203	15938.3	9.15295	49.2064	1.67711	143.682	0.293293	80.4	11.3342	90.9439	3.04359	41.7034	9.93876	18.7779	2
211100	2018	43.2325	99.5589	30.0562	114.491	11.394	21.546	17136	9.43742	49.494	1.94395	157.01	0.391477	73.18	11.4466	90.848	2.70834	41.0223	11.8047	19.0119	2
211100	2019	43.5053	99.8903	29.4634	110.334	11.0484	25.6922	18890.2	9.36908	50.6624	1.94608	166.423	0.530292	73.2	11.4982	91.0752	2.65999	41.1086	10.3837	20.6071	2
211100	2020	41.7417	100.17	28.7888	110.599	11.7991	23.0925	20578.7	9.66534	51.0458	1.9584	200.238	0.779861	77.4	11.5199	90.5567	2.92438	42.7782	10.1654	21.0204	2
211100	2021	41.4471	100.681	27.9737	109.689	11.8583	24.424	22582.8	9.51863	51.7963	1.94826	223.975	0.828972	78.08	11.5825	90.8084	3.01764	41.8613	5.94772	22.1478	2
211100	2022	40.6098	101	27.0824	96.0744	3.84237	24.7738	23233.7	9.16441	52.1022	1.93051	212.059	0.751132	78.12	11.5905	92.1489	3.01656	41.2758	8.40195	22.3005	2
211100	2023	40.3772	100.523	26.3304	81.3501	12.0149	24.9366	25109	9.40974	52.2729	1.93687	214.173	0.68871	78.71	11.5823	92.4398	3.08098	41.5347	9.49164	23.2993	2
211200	2008	53.5177	99.9684	15.6221	180.348	7.41108	15.7408	6050	9.15422	45.0771	1.5363	58.0649	0.0136892	32.03	9.77173	76.6394	2.07549	44.7358	10.9416	11.2345	2
211200	2009	55.2929	100.045	15.7667	178.716	7.59631	19.3155	6585	6.15126	42.6736	1.56686	59.2639	0.0869466	32.05	9.89295	78.2013	2.23223	39.1071	11.3613	10.8116	2
211200	2010	59.0964	99.9583	15.9882	171.248	7.50946	19.4227	7739	7.46958	44.38	1.64128	60.3477	0.0775731	42.16	10.0717	76.5378	2.31314	38.6983	12.3372	12.1086	2
211200	2011	59.7542	99.7126	22.0849	173.783	7.84405	19.3578	9271.32	8.39285	45.9214	1.71999	62.1202	0.0763697	33.23	10.2633	76.6385	2.50496	37.1301	10.4833	13.8027	2
211200	2012	61.3192	99.6102	19.3073	173.858	8.06102	20.7299	10568.9	8.45426	46.3646	1.77221	67.6827	0.121256	38.01	10.382	78.0086	2.45978	35.7141	13.9991	14.5348	2
211200	2013	60.0796	99.6212	16.5057	181.783	8.90603	19.5074	11869	8.0824	45.9442	1.83201	69.4915	0.151202	38.55	10.4388	79.8106	2.42954	35.937	14.6899	14.5267	2
211200	2014	60.8754	99.7619	17.4583	182.45	8.44524	22.895	10887.9	7.32199	45.5529	1.7626	70.7359	0.186683	42.58	10.2653	81.681	2.63256	35.3471	15.6055	14.4162	2
211200	2015	58.6644	99.6312	18.184	185.194	8.64213	20.1063	11683.2	8.38991	46.3996	1.69507	76.3128	0.225276	43.02	10.1132	85.1164	2.37664	40.7832	13.0966	14.8065	2
211200	2016	58.0721	99.7452	18.5693	183.675	8.25037	21.9418	12531	8.39719	46.9989	1.62515	71.8229	0.238852	43.1	9.88336	86.2206	2.78437	55.7534	20.566	15.6065	2
211200	2017	54.1143	99.973	18.6876	193.957	8.8371	23.6184	13376.9	8.37676	47.5093	1.55133	62.3446	0.242316	44.01	9.91448	89.7472	2.59529	49.6513	20.7041	16.2861	2
211200	2018	53.8906	100.232	18.7817	175.329	9.14057	21.1832	14208.5	6.98918	45.992	1.54509	63.053	0.246953	44.07	9.95784	89.8892	2.61784	48.0923	17.5409	15.6	2
211200	2019	53.3689	100.067	18.9064	170.516	9.00643	24.1106	15552.2	7.83617	47.6337	1.58312	70.8081	0.318101	43	10.0054	90.3532	3.05502	49.5003	18.6849	17.2212	2
211200	2020	57.0275	99.9999	19.0437	158.225	8.63645	26.7462	17001.3	8.00397	48.6261	1.59685	72.3615	0.344752	55.2	10.0511	90.3666	3.10856	45.7204	18.4416	18.5952	2
211200	2021	57.2192	100.237	19.1356	156.163	8.58965	26.2072	18811.5	8.49404	49.6372	1.5954	71.0803	0.235155	55.9	10.1386	90.1546	3.25061	42.1946	20.428	19.6461	2
211200	2022	57.3102	100.801	19.1194	153.252	8.54321	26.7794	19375.2	7.86903	49.4576	1.60916	79.1593	0.527268	56.5	10.1974	89.7177	2.75553	39.3646	19.2644	19.7586	2
211200	2023	57.455	100.574	19.1454	153.284	8.44362	26.7573	20902.3	8.38149	50.304	1.61557	76.6073	0.595165	57.1	10.2114	89.7569	3.31884	39.6111	16.148	20.7572	2
211300	2008	42.9066	99.7174	17.5104	219.298	8.98227	18.5074	4473.33	4.59378	40.1558	1.62541	114.639	0.00714687	27.49	9.48038	82.1597	2.15926	52.0994	12.3661	8.79499	2
211300	2009	43.9387	99.7315	17.1034	221.888	9.4173	15.9577	5224.85	1.88448	37.0842	1.72442	87.2296	0.0601234	28.92	9.62393	82.5825	1.79635	40.1415	14.1535	7.39909	2
211300	2010	44.7987	99.947	17.9915	224.775	9.85222	15.6063	6142	6.25801	41.9726	1.82272	124.764	0.000571899	38.13	9.87042	81.182	2.16882	45.8748	13.7355	9.93953	2
211300	2011	50.4833	100.003	24.1058	205.698	9.28456	20.3638	7536.24	7.31855	44.5849	1.92004	146.784	0.0258299	30.07	10.0792	79.4856	2.28807	49.2753	13.329	12.6374	2
211300	2012	52.767	100.361	20.3924	202.036	9.36752	18.7332	8689.01	7.89045	45.2112	2.02573	176.423	0.0970498	34.66	10.2047	76.1984	2.2432	51.479	15.8197	12.9165	2
211300	2013	50.9556	100.54	16.6756	214.333	10.5007	18.0689	9949	6.89451	44.2217	2.094	167.322	0.18104	35.22	10.2935	74.9428	2.3564	49.2483	16.4041	12.6202	2
211300	2014	50.9034	100.193	16.5921	218.192	10.0997	19.8951	9753.91	4.72216	42.0487	2.08171	172.702	0.13815	38.44	10.2809	77.0317	2.69819	46.2355	16.3937	11.8305	2
211300	2015	51.8413	99.6639	17.6781	209.568	9.77957	24.4233	10514.1	5.20712	43.3229	2.08046	183.688	0.23232	38.5	10.1295	76.55	2.61939	48.3719	19.8212	13.3866	2
211300	2016	49.0578	99.527	20.5977	217.426	9.76637	21.2739	11193	6.29212	44.2087	2.08203	167.183	0.190009	38.49	9.95288	81.7105	2.46381	45.966	22.3202	13.8294	2
211300	2017	48.7482	99.8421	21.8815	215.307	9.80987	21.4063	11893.4	6.52331	44.8459	2.077	161.188	0.231032	39.2	10.0301	91.119	2.3868	49.2497	20.6695	14.4226	2
211300	2018	48.692	99.8612	22.2816	194.048	10.1164	23.9832	12681.5	6.61245	45.5695	2.07155	167.736	0.322933	40.01	10.1164	91.3465	2.8084	47.5915	21.1392	15.3789	2
211300	2019	49.4295	99.7553	22.7069	184.106	9.72422	23.6621	13952.6	6.90451	46.1601	2.06827	183.415	0.372824	40.37	10.1332	91.401	2.77267	47.017	20.2441	16.1359	2
211300	2020	52.5637	99.3764	23.2222	171.662	9.36988	25.133	15158.6	5.28378	44.9147	2.07284	200.045	0.487214	50	10.1821	89.6107	3.27739	45.4097	18.8801	16.3411	2
211300	2021	53.3786	99.5843	23.6936	167.4	9.20769	24.5349	16813.2	6.71238	46.8757	2.21561	218.202	0.436717	50.8	10.2685	89.8513	2.53973	46.227	15.2096	17.7851	2
211300	2022	53.6025	101.075	23.812	163.852	9.13414	28.2898	17542	6.9387	48.528	2.42239	231.58	0.775653	51.1	10.3262	89.5893	3.11836	45.9844	15.5673	19.0217	2
211300	2023	53.0245	101.566	23.8095	166.092	9.14912	25.0499	18892.7	6.67763	48.2991	2.65039	236.36	0.912069	51.68	10.3797	89.2813	2.59304	46.7752	15.2677	18.9648	2
211400	2008	50.1358	100.183	14.1489	187.56	7.6591	18.7739	5066.59	6.85547	42.8697	3.17964	58.9383	0.0196261	30.93	9.7006	73.4254	2.03123	36.3444	9.18199	10.064	2
211400	2009	49.643	100.07	14.749	197.192	8.35782	16.6191	5763.84	4.0347	39.7014	3.24206	52.9251	0.0459053	30.92	9.66686	77.3258	1.98816	31.5904	9.29399	8.71683	2
211400	2010	51.1315	100.492	15.1599	198.15	8.68166	20.0642	6597	5.66649	42.3627	3.37802	53.8083	0.0279599	31.62	9.84493	78.7207	2.26416	34.452	14.9546	10.6228	2
211400	2011	50.3415	101.327	19.7607	206.277	9.31071	17.4229	7901	6.52576	43.7266	3.4836	62.9267	0.0239862	31.6	10.048	79.3069	2.23294	36.022	11.8596	11.5671	2
211400	2012	49.8811	101.02	17.2974	213.725	9.90947	20.9373	8983.44	6.63778	44.401	3.53926	76.6374	0.14545	31.8	10.1539	79.2305	2.37112	37.1307	13.8482	12.6066	2
211400	2013	50.4202	100.488	14.9606	216.609	10.6122	17.5996	9927	6.76674	43.8945	3.62712	81.6733	0.161244	31.7	10.2289	78.118	2.28411	37.8415	12.032	12.3085	2
211400	2014	51.8525	99.4181	15.5833	214.198	9.9148	20.4436	9556.2	2.31036	39.1977	3.50177	62.0715	0.178513	31.6	10.1545	77.9086	2.33117	29.1032	15.234	10.6138	2
211400	2015	52.8034	99.4422	14.7816	205.75	9.60138	21.1464	10232.8	4.10192	41.3574	3.37401	77.2017	0.238078	33.2	10.1547	77.2611	2.51258	33.7997	14.9199	11.8779	2
211400	2016	52.8846	99.2622	15.3086	201.692	9.05965	23.2753	10986	4.8525	42.6532	3.25059	96.1465	0.263968	33.5	10.0484	74.2522	2.39758	39.0354	18.3974	13.0505	2
211400	2017	54.5688	99.4788	17.028	192.341	8.7635	23.9105	11727.2	4.88077	43.1774	3.11834	101.783	0.29013	34.4	10.1627	66.4196	2.83996	39.4415	14.4031	13.731	2
211400	2018	54.8194	99.4807	17.2068	172.358	8.98569	21.5877	12483.2	4.54535	42.6647	3.12927	111.659	0.28959	35	10.2904	67.4838	2.9675	40.3838	12.6657	13.5307	2
211400	2019	56.9342	98.7211	17.5207	159.838	8.44243	23.2345	13720.9	4.45442	42.8926	3.25001	117.958	0.316838	35.03	10.2833	65.7352	3.0229	39.8357	13.892	14.4596	2
211400	2020	55.854	98.4334	17.8921	161.549	8.81789	25.3486	14861.8	4.4595	43.4032	3.33036	133.265	0.367685	54.76	10.2454	59.959	2.97419	39.2624	12.8668	15.4369	2
211400	2021	58.8066	99.1207	18.1441	151.948	8.35778	23.5782	16365.1	4.9027	44.325	3.36482	148.488	0.346308	55	10.344	57.4613	2.69873	41.3112	11.4483	16.1518	2
211400	2022	58.4585	100.459	18.1541	150.242	8.3754	23.0843	16935.9	4.74874	44.7918	3.40537	158.828	0.454527	55.8	10.3816	57.8914	2.80129	40.5389	10.8541	16.3036	2
211400	2023	58.7544	100.554	18.1465	149.894	8.25688	24.073	18135.2	4.6653	45.2211	3.4196	169.704	0.536806	56.62	10.432	56.5899	2.75537	42.049	11.8224	17.0584	2
220100	2008	41.4719	100.13	8.22422	107.611	5.14136	9.49137	5291.9	8.43749	42.8962	1.2314	42.4792	0.0665006	47.96	10.4354	92.2197	1.16351	42.2861	6.96896	8.52931	1
220100	2009	43.8892	100.078	8.11539	103.295	3.69415	11.3957	5661.8	6.32425	41.1327	1.35837	43.068	0.0582671	47.89	10.5362	91.7036	1.32038	44.2935	8.86678	8.11336	1
220100	2010	43.7926	99.9896	8.38654	101.483	3.80053	11.2486	6665	6.91991	41.9684	1.4874	46.6502	0.0648288	47.81	10.6889	91.5117	1.22041	44.9641	8.39148	8.88525	1
220100	2011	46.4516	99.9649	8.89127	109.761	3.56248	14.384	7965.1	6.65487	42.5646	1.63427	51.1787	0.059914	47.89	10.8695	91.5889	1.54054	47.458	6.58705	10.0903	1
220100	2012	46.8686	99.9324	8.90635	110.447	3.70057	14.311	9064	7.31703	43.519	1.79191	55.244	0.0646235	47.96	10.9833	92.6509	1.61488	50.5053	6.40075	10.9445	1
220100	2013	46.8501	99.7534	8.93746	115.648	3.66194	14.3212	10060	7.90371	44.3241	1.93937	57.3823	0.0747177	48.33	11.1045	92.9254	1.57608	50.9914	6.59183	11.7174	1
220100	2014	46.8926	99.6158	8.86525	120.133	3.5994	13.3673	11285.6	7.78405	44.3114	2.10634	57.7506	0.079315	48.5	11.1676	93.06	1.66312	51.4491	5.31329	12.0845	1
220100	2015	47.0692	99.4598	8.86965	121.271	3.48693	15.5851	11749	7.64193	44.5738	2.30738	56.3324	0.0998241	57.85	11.2031	93.7422	1.88114	49.4828	6.04313	12.6684	1
220100	2016	47.8411	99.5146	8.91256	117.668	4.31593	14.9673	12576	7.87043	44.9263	2.34129	50.7371	0.141401	58.11	11.2835	93.0605	1.71635	46.2019	7.45707	13.0899	1
220100	2017	46.9112	99.6206	8.99668	121.389	4.54266	15.9731	13431	8.26785	45.7565	2.52395	33.8286	0.161727	58.53	11.3836	96.3678	1.91903	34.4627	11.579	13.8885	1
220100	2018	47.2055	99.7858	9.01599	118.053	4.30115	15.2411	14237	6.80147	44.3991	2.67894	37.5265	0.197838	58.76	11.4674	96.0477	1.70768	36.0714	10.9001	13.4754	1
220100	2019	46.8857	99.8552	9.02906	117.286	3.84847	13.4743	15455	7.48851	45.2094	2.85944	37.3383	0.227805	59.05	11.2683	95.9413	1.54461	30.6838	9.83786	14.0708	1
220100	2020	58.3478	99.9748	10.1706	111.536	3.79369	15.5887	16636	7.43312	45.9761	3.71828	58.0636	0.273076	65.9	11.3226	95.8725	1.90412	32.8432	11.0489	15.3266	1
220100	2021	58.5528	100.128	10.1576	100.455	3.26386	13.2327	18473	7.88032	46.6477	4.07033	52.3515	0.397703	66.8	11.331	95.6156	1.63528	38.0987	12.2449	16.0165	1
220100	2022	58.7475	100.224	10.1075	92.7228	3.20343	16.5247	18919	7.87326	47.3186	4.29155	60.601	0.493961	67.1	11.2805	95.6224	2.02594	41.841	10.6419	16.8613	1
220100	2023	59.1422	100.116	10.0684	84.8781	3.13636	13.5104	20443	8.03441	47.3739	4.47099	60.1585	0.560011	68.2	11.3288	95.3794	1.6696	43.5067	11.3055	17.1291	1
220200	2008	50.2967	99.7658	12.748	132.278	4.44102	11.3408	7520.53	7.90034	43.3585	1.6819	47.3447	0.0374856	48.89	10.2977	91.9378	1.23739	48.3115	8.54306	10.2535	1
220200	2009	53.7836	99.6008	12.7991	122.376	4.13448	10.3647	8006.1	5.87473	41.1811	2.03567	49.1978	0.0452736	48.84	10.443	92.607	1.19667	45.4073	9.51582	9.4185	1
220200	2010	55.0804	99.4918	14.5778	126.9	4.35776	10.8891	8523.45	5.81879	41.3785	2.26356	58.7642	0.0769289	48.7	10.6331	93.08	1.46843	45.8863	10.0685	9.91542	1
220200	2011	55.4895	99.9829	14.3918	61.9683	3.70607	12.6445	9074.69	5.68377	41.9014	2.46537	226.515	0.0860866	48.56	10.8388	93.3357	1.40134	47.1192	8.30649	10.466	1
220200	2012	55.7547	99.9839	14.4086	66.7135	3.89206	10.8827	9662.07	5.92436	42.024	2.64442	245.263	0.0834977	48.66	10.9404	93.2636	1.32772	53.2876	7.28039	10.545	1
220200	2013	56.1503	100.008	14.4219	71.232	2.94203	13.4745	10288	6.48513	43.239	2.83572	237.941	0.069914	48.65	11.0186	93.5531	1.6642	53.4089	8.06744	11.6213	1
220200	2014	55.8732	99.3966	14.5241	77.0692	0.633858	12.4231	11000	6.4163	43.0396	2.98393	245.897	0.0824897	48.51	10.9266	93.4715	1.59792	57.5401	8.22644	11.7344	1
220200	2015	55.4751	98.8136	14.7132	83.701	1.06311	15.154	11495	6.63145	43.5667	3.1584	202.93	0.102201	52.33	10.9361	94.3281	1.67869	51.3164	8.64088	12.5923	1
220200	2016	57.7797	98.6138	14.935	86.5029	1.44108	12.8106	12285	6.4442	43.1335	2.92794	167.614	0.151463	52.8	10.9706	94.5565	1.70257	48.9444	8.08683	12.5071	1
220200	2017	57.893	99.3376	15.0497	91.9437	1.85578	14.5892	13096	6.83732	44.3262	3.19283	64.4501	0.177965	52.8	10.9365	98.1257	1.94639	35.7394	12.9412	13.4652	1
220200	2018	56.4619	100.237	15.0291	99.2007	2.3156	13.3885	13895	5.91559	43.7233	3.42772	66.4429	0.206133	52.94	10.8853	97.5902	1.55601	37.9933	12.5566	13.2032	1
220200	2019	55.7607	100.365	14.9893	105.278	2.75717	16.8597	14883	6.55997	45.2294	3.60103	64.8202	0.221872	52.99	10.4456	97.5668	1.95523	36.0182	12.6174	14.6452	1
220200	2020	55.7852	100.523	14.9263	109.851	3.16025	13.9729	16035	6.49343	45.0512	3.84151	70.9493	0.227741	63.47	10.4829	97.4273	1.84649	33.8404	12.8494	14.6428	1
220200	2021	55.2314	101.024	14.7898	114.993	3.57813	15.4022	17777	6.85228	46.2879	3.99849	71.3986	0.323141	64.12	10.5599	97.5232	2.1072	36.6071	12.553	15.9462	1
220200	2022	54.8013	102.293	14.4727	118.387	3.93773	14.6046	18380	6.81657	46.7777	4.16367	75.5824	0.437161	52.73	10.544	97.6992	1.67599	39.1747	13.2197	16.0816	1
220200	2023	54.7295	101.933	14.2124	121.293	4.27321	15.7255	19621	6.93389	47.223	4.18298	71.7877	0.520652	52.51	10.5909	96.7925	2.15143	40.2166	14.206	16.9366	1
220300	2008	64.9015	100.208	15.6327	185.207	5.82826	10.9513	5045	10.6745	45.898	1.73228	71.7255	0.105171	37.73	9.77976	89.207	1.31019	37.9456	11.642	10.7404	1
220300	2009	69.0848	100.168	15.9452	168.254	5.18049	12.348	5418	7.8623	43.3261	1.88459	63.4415	0.0919625	37.34	9.87409	90.9249	1.39585	33.2784	13.639	9.96581	1
220300	2010	74.8908	100.152	16.4162	149.958	4.50849	10.2361	6586	10.0281	45.6594	1.9261	84.1435	0.145061	37.14	10.0385	91.1305	1.18524	39.5475	14.4788	11.3047	1
220300	2011	81.1085	100.138	15.7687	133.646	3.91451	12.1093	7718	8.90043	45.1021	2.16276	93.1055	0.12763	52.97	10.2704	92.705	1.38628	39.3638	12.8819	11.7474	1
220300	2012	81.1231	100.054	16.6938	128.927	3.66926	12.0495	8760	8.98785	45.4799	2.31237	98.4916	0.151595	42.84	10.4159	93.6801	1.47517	41.538	10.9087	12.3725	1
220300	2013	81.2272	99.8629	17.6518	124.316	3.42713	13.0386	9960	9.33239	46.2909	2.4833	100.767	0.154171	43.67	10.5148	93.7676	1.48723	41.7206	10.5484	13.3973	1
220300	2014	81.4355	99.7704	18.3397	119.663	3.18384	12.1652	10723	8.85719	45.8638	2.73628	96.7067	0.151708	44.47	10.5157	94.9988	1.5596	40.5711	11.8314	13.4481	1
220300	2015	81.7614	99.6215	18.4147	115.018	2.94086	12.389	11281	8.70843	45.8452	3.19527	96.4783	0.192912	36.63	10.5396	95.5413	1.36894	39.4127	12.1727	13.7074	1
220300	2016	82.1192	99.5846	18.4915	110.375	2.69796	12.0168	12063	8.87939	46.1739	3.32556	86.7573	0.200636	36.87	10.5145	94.3511	1.40318	36.5763	10.3191	14.1198	1
220300	2017	82.1362	99.5954	18.7898	106.164	2.46513	13.9728	12871	9.14627	47.0038	3.58411	58.5953	0.226225	39.42	10.4166	97.8593	1.753	35.8507	20.4267	15.045	1
220300	2018	84.0301	99.8002	19.7048	99.4371	2.17618	14.0249	13643	7.70038	45.8555	3.78262	65.9069	0.232692	36.67	10.2956	95.4631	1.60346	37.8804	21.14	14.8748	1
220300	2019	84.268	99.8607	20.5422	94.7596	1.93518	14.682	14803	8.08391	46.7446	4.08678	67.9338	0.265189	36.5	10.1279	95.2017	1.75485	33.5561	20.3662	15.8344	1
220300	2020	55.741	100.038	17.655	96.0518	0.73192	14.9881	15890	7.63337	46.4114	2.78545	53.1063	0.302121	51.57	9.90349	94.2067	1.78666	30.0668	28.1436	15.5106	1
220300	2021	55.765	100.169	17.6991	101.566	0.643112	14.857	17676	8.03117	47.336	2.92131	42.4572	0.307242	51.99	10.1852	94.0241	1.70662	32.483	18.3244	16.5736	1
220300	2022	55.4705	100.349	18.6091	100.909	0.86184	14.6717	18207	7.99585	47.5167	3.00543	48.9449	0.362457	42.28	10.2345	94.6366	1.6821	34.0059	19.2162	16.8623	1
220300	2023	55.4753	100.2	19.5416	99.8607	1.07716	15.1688	19491	8.19831	48.1174	3.13386	65.3864	0.442639	42.11	10.1811	94.7181	1.74244	34.8976	18.9462	17.7662	1
220400	2008	38.8414	100.207	6.6815	72.3114	4.92635	11.0497	7103.22	8.88621	44.0457	1.44706	39.4275	0.0763086	45.07	9.99828	95.7029	1.52033	37.4468	8.71171	9.77194	1
220400	2009	39.1356	99.9777	6.95395	75.5556	4.02779	11.3049	7582.17	6.7264	41.9068	1.65456	31.3095	0.0529939	45.13	10.2095	96.793	1.20739	29.931	9.95187	9.06666	1
220400	2010	39.4344	99.8789	7.34171	78.8218	4.18913	12.9032	8093.54	8.46922	44.0907	2.13673	46.3966	0.08194	45.23	10.4086	96.3264	1.47156	39.027	10.5272	10.4779	1
220400	2011	44.6101	99.5044	7.60508	73.3535	1.42246	9.91915	8639.54	7.04501	42.2881	2.41278	51.6813	0.0881388	45.28	10.6178	96.7186	1.30913	42.8527	9.51387	9.61766	1
220400	2012	55.8664	99.4875	7.65153	61.5479	1.55845	12.5368	9222.52	5.9043	41.7207	2.76037	52.4929	0.103896	45.5	10.8118	97.6033	1.63724	41.7814	8.63472	10.0621	1
220400	2013	56.2182	99.1417	7.72511	64.3709	1.97983	11.7733	9845	6.5068	42.2374	2.98046	50.7187	0.105309	45.57	10.9586	97.3666	1.43119	38.8555	10.139	10.514	1
220400	2014	57.531	99.4006	5.66266	65.9147	2.35697	11.1571	10500	6.57222	42.3798	3.08456	58.0642	0.0998902	45.47	10.9451	97.4018	1.46275	44.9892	9.45953	10.6148	1
220400	2015	60.3624	99.4927	5.68906	65.6657	2.65125	10.948	10973	6.33832	42.2704	3.3145	54.8123	0.101414	48.46	11.0046	97.7106	1.35194	41.5326	10.6381	10.7542	1
220400	2016	61.0975	99.4227	5.72458	67.759	3.02547	15.1757	11767	6.42769	43.1968	3.127	48.7937	0.143948	50.23	11.063	97.5605	1.98983	38.6406	10.7776	12.0067	1
220400	2017	62.3054	99.2757	5.76885	71.3562	3.07695	14.1864	12555	7.12104	43.9202	3.2681	14.184	0.181285	50.55	10.9813	98.9703	1.82201	44.0286	16.0034	12.5592	1
220400	2018	62.2112	99.6869	5.78697	73.9968	2.85691	14.6191	13346	6.06095	43.2656	3.46791	15.5176	0.200558	50.32	10.8805	98.4063	1.88257	44.8062	15.896	12.55	1
220400	2019	57.5078	99.8323	5.76395	76.9494	2.96238	18.154	14467	7.14491	45.2758	3.60593	16.5892	0.256369	49.9	10.4643	98.1255	2.0032	40.4771	14.476	14.2117	1
220400	2020	58.2476	99.9582	5.76385	74.5893	2.5876	13.3545	15552	6.68881	44.4025	3.69209	21.5835	0.197956	57.7	10.5249	97.8384	1.6458	39.2749	15.2503	13.6478	1
220400	2021	58.013	100.423	4.98451	76.0099	0.945646	13.9287	17027	7.05671	45.4941	3.80197	36.9371	0.320117	58.32	10.6119	98.0425	1.8073	39.9066	16.1089	14.6129	1
220400	2022	57.1186	101.591	4.94349	77.4249	3.5809	15.0256	17783	7.1068	46.2772	3.89405	42.4125	0.419999	49.52	10.6996	98.1493	1.77909	40.9458	15.9401	15.2342	1
220400	2023	56.4264	101.267	4.9182	78.8269	3.44906	14.221	19102	7.28392	46.5474	3.96236	43.1712	0.457829	59.82	10.7372	98.1859	1.84524	42.4583	14.7602	15.802	1
220500	2008	49.1827	99.3174	18.1167	132.904	4.46202	11.1184	10944.2	8.20647	44.6077	2.2744	46.2972	0.0634083	37	9.8856	88.2182	1.31254	50.9019	11.5991	12.4783	1
220500	2009	49.9171	99.1705	18.226	129.285	4.3679	11.6763	10789.4	6.71674	43.047	2.49445	44.0789	0.0708351	40.3	10.0362	88.1574	1.41823	46.209	12.8883	11.8239	1
220500	2010	56.5938	99.1177	20.2794	121.097	4.15848	14.1267	10613.6	6.39817	43.1839	2.51666	53.5739	0.0866396	48.09	10.2304	89.5044	1.63435	46.8163	14.0136	12.3308	1
220500	2011	60.8321	99.1207	20.1924	66.5315	3.56663	10.2842	10414.2	5.82	41.9856	2.66966	155.938	0.0681978	48.6	10.4494	89.9588	1.16736	47.7313	12.5476	11.2973	1
220500	2012	61.3821	99.1707	20.3819	70.1841	3.33008	10.4817	10188.9	6.10588	42.3006	2.8392	158.6	0.0837717	51.12	10.5772	89.8597	1.27964	48.0194	10.5297	11.3827	1
220500	2013	61.7577	99.7213	20.4597	73.6374	2.72881	10.916	9935	6.53136	43.0107	3.01137	161.506	0.0888762	52.47	10.7175	89.5441	1.32065	49.9813	11.0985	11.5664	1
220500	2014	61.0516	99.7734	20.5269	78.3943	0.843205	12.1432	9700	6.32596	43.0315	3.10033	151.815	0.0676789	52.36	10.723	89.0155	1.45964	48.521	10.5388	11.5811	1
220500	2015	61.9794	99.4415	20.6632	81.3555	1.17681	10.9247	10117	6.20231	42.6779	3.21554	154.224	0.0670506	52.49	10.7207	90.0067	1.48454	51.8637	10.4796	11.5183	1
220500	2016	63.6737	99.4389	20.8008	83.2603	1.4863	13.8871	10877	6.29196	43.439	3.09668	123.126	0.136312	51.97	10.6706	90.1341	1.70055	48.5745	10.3053	12.5409	1
220500	2017	61.6051	100.302	20.7591	89.53	1.87611	12.8785	11660	6.78807	44.3316	3.3115	84.4782	0.186378	51.88	10.6199	93.805	1.4945	45.3651	12.757	12.9599	1
220500	2018	64.1147	100.496	20.6776	89.1704	2.12319	12.3328	12430	6.08011	43.7875	3.44493	90.1182	0.203207	51.7	10.5556	92.6666	1.44265	48.5052	13.4266	12.9499	1
220500	2019	63.1564	100.04	20.6901	94.1089	2.48881	14.3311	13497	6.61076	44.7245	3.57485	87.9444	0.2232	50.15	10.4273	92.7329	1.82672	47.9595	12.7808	14.083	1
220500	2020	43.9009	99.982	20.7147	140.622	4.06206	15.4355	14523	6.4104	44.7283	2.44629	79.7135	0.257098	60.64	10.4701	91.0666	1.88949	52.5429	13.1574	14.3849	1
220500	2021	43.3987	100.828	20.5654	146.311	4.5579	15.9383	16083	6.57201	45.7045	2.54103	77.1167	0.318475	61.3	10.2054	91.475	1.79669	53.4539	11.9208	15.3385	1
220500	2022	43.0663	102.448	20.0942	149.06	4.95799	15.9766	17125	6.58625	46.631	2.61811	81.4409	0.400764	61.5	10.2498	91.8487	2.12995	54.0315	12.4853	15.8738	1
220500	2023	42.1561	102.506	19.6227	153.682	5.41428	16.2728	18212	6.69629	47.0518	2.65627	76.4173	0.417404	62.51	10.2897	91.875	1.8344	54.5921	12.1363	16.4722	1
220600	2008	64.9373	97.4234	4.86254	94.3104	2.43763	9.47364	9862.06	5.04697	39.5219	4.82556	168.898	0.0762993	68.3	10.0502	78.6884	1.23296	40.1586	9.16989	9.26442	1
220600	2009	68.7226	97.4085	4.9919	90.0347	2.29372	11.3451	9766.53	3.7703	38.4846	5.17593	191.705	0.0596958	67.88	10.2217	78.883	1.3525	41.8882	9.63913	9.04533	1
220600	2010	74.6028	96.5584	5.16983	84.5094	2.21434	12.2587	9657.45	3.96751	38.5029	4.6457	223.447	0.065278	68.73	10.424	80.6876	1.46364	42.7166	9.87273	9.34679	1
220600	2011	79.5278	95.0683	5.43801	82.0216	2.72817	10.5545	9533.11	4.60554	38.2713	5.38789	327.616	0.538539	68.82	10.63	78.103	1.30584	53.9319	9.67198	9.32523	1
220600	2012	85.3279	94.2658	5.76881	79.7453	2.80946	12.0502	9391.63	4.84734	38.4381	5.86983	356.956	0.126807	69.38	10.8253	76.7159	1.31267	53.0436	9.69671	9.75406	1
220600	2013	86.3092	99.0847	5.8221	81.0046	2.78171	14.2253	9231	5.31764	41.2512	6.10247	476.843	0.101685	70.31	10.8781	76.5799	1.64448	66.8625	11.4292	10.4614	1
220600	2014	88.246	101.025	2.41675	75.4399	2.54874	11.6987	8600	4.71347	40.7237	6.07242	474.988	0.346976	69.38	10.8868	76.8433	1.33361	67.1945	10.5787	9.18995	1
220600	2015	90.1366	98.8763	2.55166	75.8573	2.54678	14.1097	9090	5.21492	40.8791	6.17769	489.763	0.3528	73.12	10.8842	77.9221	1.5718	67.7351	13.4454	10.1103	1
220600	2016	92.3541	97.4025	2.5094	74.7728	2.64179	14.3557	9775	5.1081	40.3788	4.30045	453.215	0.451967	75.18	10.9526	77.6044	1.82815	65.3308	12.2832	10.4422	1
220600	2017	91.0053	99.9625	3.08965	76.6523	2.82287	13.2866	10469	5.18353	41.5507	4.30482	317.808	0.661378	74.62	10.9437	80.7424	1.74081	53.4096	11.5559	10.7183	1
220600	2018	100.269	98.8444	3.12577	69.3151	2.62196	14.0802	11160	4.61544	40.8667	3.61138	369.518	0.835586	74.3	10.9345	81.9386	1.84129	56.3951	12.9917	11.0757	1
220600	2019	117.21	97.7718	3.19701	57.8977	2.03743	15.2627	12093	4.75732	41.1398	3.65372	395.826	0.998494	74.21	10.6806	80.3224	1.7379	56.2307	12.801	12.0953	1
220600	2020	119.384	97.97	2.6951	56.9549	1.9205	13.4367	12993	4.37193	40.7625	3.77313	498.06	1.18555	79.32	10.6979	83.1249	1.49571	58.4544	12.0888	12.0196	1
220600	2021	120.065	100.463	2.68268	55.631	1.72766	14.6876	14261	4.51385	42.4935	3.81376	511.235	1.78319	79.64	10.7764	82.9247	1.84198	56.7722	11.5721	13.0371	1
220600	2022	111.816	107.01	1.63967	56.4314	1.82922	15.8781	14643	4.55956	45.4523	3.61812	550.629	2.36777	79.95	10.7871	83.2261	1.68412	59.2038	11.0799	13.4317	1
220600	2023	100.919	110.899	0.696498	60.9729	1.92846	14.9959	16077	4.61297	47.2469	3.27476	464.902	2.33046	80.3	10.8172	83.8612	1.88064	55.95	11.1419	13.8533	1
220700	2008	36.2838	100.79	19.6189	191.233	6.42032	9.9635	8987.86	10.3897	46.7032	1.62357	28.4581	0.0524493	27.77	10.2505	82.0217	1.13305	56.8598	15.4395	12.2523	1
220700	2009	40.3256	100.809	16.5144	167.132	5.64656	10.2946	9052.52	7.00506	43.1483	1.81844	32.8654	0.0389019	27.94	10.3496	83.0535	1.16487	56.0741	21.3511	10.5707	1
220700	2010	39.9535	100.648	23.3602	176.254	6.05258	11.0251	9122.79	8.05756	44.6269	1.92438	45.1171	0.0634498	28.02	10.5459	83.6425	1.21113	55.9517	16.8302	11.7915	1
220700	2011	39.1477	100.262	22.994	82.447	3.62951	14.0899	9199.23	8.5819	45.6273	2.09536	179.621	0.0621399	28.22	10.7492	87.3352	1.50425	60.7234	14.4566	12.6041	1
220700	2012	50.8994	100.266	22.9565	69.1137	4.25134	11.0138	9282.41	6.92543	43.4788	2.27304	179.071	0.0641903	29.59	10.9223	84.7786	1.25	64.8416	14.6033	11.4801	1
220700	2013	50.4908	100.193	22.9356	75.445	3.24833	13.2263	9373	7.06991	44.0118	2.41983	165.744	0.0713211	29.67	10.9737	87.668	1.63742	66.259	16.4174	12.0022	1
220700	2014	51.1132	99.8648	22.9901	80.4695	0.581015	12.9642	8708	6.76684	43.4679	2.59337	144.623	0.058861	27.03	10.9564	86.1726	1.68345	63.6595	16.7305	11.4854	1
220700	2015	51.4392	99.4337	23.1445	86.2532	1.03657	13.6456	9561	7.12658	43.9836	2.79366	133.892	0.0617546	31.32	10.9833	84.566	1.47968	61.4035	16.7196	12.2159	1
220700	2016	50.919	99.694	23.2392	93.3178	1.5124	14.0642	10258	7.46572	44.6744	2.75015	111.851	0.0740675	34.04	10.9923	82.4674	1.7502	58.0946	19.349	12.8089	1
220700	2017	55.1646	99.9834	23.2666	91.6118	1.82278	13.2955	10976	8.07341	45.5145	2.89597	61.8228	0.0942256	33.09	10.9152	76.3276	1.61125	56.5523	25.814	13.3897	1
220700	2018	50.8152	100.16	23.253	105.214	2.43794	15.1624	11678	7.08365	44.9686	3.0135	62.8767	0.106354	32.89	10.8188	82.0349	1.68762	58.4081	24.6289	13.559	1
220700	2019	51.1123	99.7913	23.3253	110.719	2.88942	15.3234	12802	7.23256	45.2747	3.20424	61.1408	0.117581	46.3	10.1866	82.0395	1.96055	56.3718	27.1079	14.2219	1
220700	2020	51.5526	99.4801	23.4709	116.224	3.33875	14.3728	13766	7.04968	45.0448	3.37781	69.8418	0.151042	46.89	10.2231	82.1808	1.58878	56.1854	27.1246	14.4485	1
220700	2021	52.2653	99.8191	23.5372	120.655	3.75278	14.7044	15408	7.3988	46.023	3.59243	68.5238	0.204225	47.68	10.3114	82.3764	1.94833	57.7738	24.6423	15.5231	1
220700	2022	51.6134	100.183	23.518	127.827	4.25172	16.5327	16352	7.43572	46.7192	3.72829	76.0599	0.275722	47.93	10.3802	84.0748	1.88427	60.7494	27.3606	16.3557	1
220700	2023	52.4164	100.179	23.4996	131.414	4.62976	15.013	17898	7.54832	46.9885	3.87517	71.3421	0.293897	48.69	10.405	83.5232	1.98923	61.6449	29.8565	16.9057	1
220800	2008	24.7853	100.152	21.3924	286.924	9.63299	8.97818	4579.15	6.85063	41.2588	1.29292	12.933	0.0291935	39.79	9.56999	75.6543	1.17935	56.6192	17.7539	8.1295	1
220800	2009	34.2837	100.478	17.7249	201.727	6.81534	12.7941	4945.05	3.95122	39.0829	1.37095	14.1292	0.0282319	39.86	9.76379	75.9108	1.50641	54.676	21.483	7.54238	1
220800	2010	35.3764	100.477	17.7825	203.598	6.99158	13.2525	5341.59	5.27691	40.6496	1.46233	18.9041	0.0351895	39.99	9.99739	73.9819	1.45629	58.0815	17.6628	8.47338	1
220800	2011	38.8201	100.462	17.4689	63.7785	4.02037	13.6018	5771.43	4.39363	40.0605	1.56508	114.238	0.0398284	39.9	10.2178	78.1747	1.67397	61.7862	16.1924	8.37426	1
220800	2012	41.0955	101.27	17.2674	68.332	3.99808	12.1539	6237.51	4.31033	40.2096	1.66696	108.253	0.0459911	40.08	10.3345	78.4091	1.33844	66.5071	16.7317	8.33838	1
220800	2013	39.0755	101.26	17.0699	80.152	3.89716	12.6867	6743	5.0323	41.158	1.73214	91.1145	0.0497286	40.01	10.4566	82.4762	1.47584	65.4021	17.6432	8.98063	1
220800	2014	39.6545	100.362	17.0257	87.7122	0.258085	13.4269	7312	4.8998	41.0746	1.87635	81.3533	0.0447942	39.91	10.4542	83.2041	1.6451	64.5274	19.0843	9.32688	1
220800	2015	41.7494	99.6407	17.1045	92.2051	0.848737	11.12	7751	4.66671	40.2714	2.0323	74.5351	0.0496965	43.14	10.4794	84.7513	1.38783	65.0236	21.351	9.02156	1
220800	2016	41.7437	99.9331	17.1334	100.88	1.45263	13.0623	8387	4.68994	40.8618	2.06571	58.4565	0.0746916	44.35	10.4989	83.65	1.6617	61.8837	19.9913	9.72811	1
220800	2017	33.8845	100.21	17.1149	134.591	2.52736	13.1807	9024	6.00492	42.4334	2.14726	46.2567	0.0836754	44.22	10.4401	89.4221	1.53812	63.0597	27.13	10.5595	1
220800	2018	35.9341	100.098	17.1155	136.751	3.07944	14.599	9908	5.82908	42.6449	2.23095	45.7003	0.108064	44.02	10.371	90.1723	1.63304	64.013	25.0055	11.2185	1
220800	2019	38.0982	100.124	17.1117	138.207	3.55902	15.2451	11216	5.66087	42.9156	2.32432	40.7639	0.112757	54.44	10.1671	92.1539	1.77264	58.9217	31.0689	11.9525	1
220800	2020	38.5601	100.213	17.0925	145.511	4.15771	17.8054	12205	5.59235	43.5163	2.47225	43.1574	0.145931	54.44	10.2136	92.8514	1.93178	56.3329	27.4851	12.9078	1
220800	2021	38.8606	100.22	17.0723	153.228	4.75888	15.0729	13510	6.01683	43.8487	2.58178	39.8508	0.20737	54.97	10.2981	93.4286	1.92205	55.0591	24.9221	13.2457	1
220800	2022	39.5584	100.309	17.0369	159.031	5.28964	15.7713	14282	5.99463	44.1521	2.7087	42.2901	0.274491	43.3	10.3552	93.2922	1.84228	56.1033	26.3117	13.7644	1
220800	2023	40.078	100.234	17.0142	165.435	5.82836	15.3893	15717	6.07961	44.5026	2.84883	40.4669	0.313974	56.2	10.3947	92.9447	1.96239	58.9828	32.8639	14.454	1
230100	2008	48.3783	100.078	7.63607	99.92	3.38578	29.2489	6371.95	7.13264	44.9936	1.54471	71.9686	0.0302114	48.18	10.2742	93.3983	3.7604	50.7978	9.49527	12.2646	1
230100	2009	51.3891	100.104	7.8972	98.0584	3.06218	30.4209	6707.7	7.06704	45.2553	1.80191	81.6911	0.0121544	48.11	10.3743	95.6939	3.73676	54.7319	9.17103	12.6968	1
230100	2010	52.4792	99.912	8.05099	100.115	3.16758	28.4165	7031.4	7.62696	45.541	1.99264	94.6252	0.0232402	47.96	10.5171	95.8061	3.57608	56.7705	13.8735	12.768	1
230100	2011	52.7587	99.8331	19.333	103.746	3.23543	32.2258	8184	8.53663	47.908	2.13797	107.954	0.0171598	47.97	10.6621	95.16	3.91536	56.9758	11.242	15.4248	1
230100	2012	53.7293	99.8447	19.3511	105.959	3.31333	30.9283	9468.9	9.01817	48.5538	2.36526	116.111	0.0347659	48.21	10.732	95.0428	3.88242	57.0574	9.83903	16.0661	1
230100	2013	54.0623	99.8323	19.3716	106.117	3.22125	38.3624	11181.8	7.21891	48.2879	2.46394	121.802	0.0543634	48.31	10.828	95.0306	4.28254	56.145	9.73003	17.4917	1
230100	2014	54.5169	99.6708	19.4236	108.856	3.07722	34.064	12546.1	7.33459	48.0352	2.60689	127.663	0.0397408	48.75	10.8984	95.209	4.50388	55.2418	9.02859	17.4221	1
230100	2015	54.6961	99.4145	20.0081	108.872	3.64053	38.2055	13325	7.42781	48.8854	2.74898	145.83	0.0450542	48.3	10.9991	95.3475	4.43013	55.7881	11.6493	18.6831	1
230100	2016	54.061	99.69	21.0831	110.741	3.66588	34.9341	14391	7.00527	48.3692	2.79663	152.481	0.0799157	48.62	11.0576	94.4792	4.55157	55.2245	13.5515	18.4838	1
230100	2017	55.2963	99.6538	21.4697	109.506	3.10897	39.2425	15557	6.76565	49.1384	2.88441	144.38	0.095956	48.57	11.0901	89.0443	4.39227	59.2188	11.2132	19.822	1
230100	2018	52.9463	99.6799	21.8592	115.071	3.04653	38.7828	16934	6.36391	49.0224	2.97786	142.573	0.103293	49.1	11.1002	96.7049	4.88995	64.3876	11.8574	20.228	1
230100	2019	54.9237	99.8652	21.9253	103.51	2.2912	44.4464	18238	6.23885	50.2541	3.11743	157.453	0.0967035	49.8	10.9186	96.6319	4.78433	63.0948	10.4061	21.9381	1
230100	2020	54.9804	100.141	21.3986	104.317	1.64892	42.0599	19631	6.19245	50.3146	3.21329	172.126	0.133903	70.61	10.9104	97.3123	4.86534	63.7952	10.2287	22.1269	1
230100	2021	54.9199	100.325	21.6314	105.485	1.20134	46.2141	21512	6.39449	51.7805	3.29731	171.015	0.140306	76.94	10.9465	97.6387	4.9084	64.4756	8.82151	23.9725	1
230100	2022	54.6559	100.672	19.0146	104.682	1.0919	45.9588	22260	6.3428	51.9037	3.37616	173.709	0.187671	56.26	10.9751	98.3861	5.30496	65.6012	10.3834	24.0636	1
230100	2023	54.4295	100.581	16.4466	103.367	0.983083	47.1841	23647	5.73306	51.6625	3.40678	165.614	0.226429	56.14	10.9905	98.3272	5.01142	65.59	10.9969	24.4849	1
230200	2008	42.0434	100.305	0.487712	89.8207	2.95134	17.4982	4031.6	4.37999	39.3761	0.879295	83.0765	0.0287906	35.96	9.36722	79.7677	1.96713	60.235	12.2687	6.88722	1
230200	2009	43.4127	100.339	0.548675	88.6938	2.79483	18.9654	4777	3.97303	39.4088	0.983207	85.4319	0.0369383	35.66	9.39941	90.0956	2.15204	60.9622	14.0055	7.37571	1
230200	2010	44.7442	100.402	0.60884	87.6428	2.64885	16.6015	6125	4.60597	40.0989	1.09329	84.6679	0.0266321	35.83	9.64847	88.4433	2.08771	60.782	20.177	7.92903	1
230200	2011	44.6259	100.512	14.7877	89.3556	2.59053	21.1167	7725	4.92405	42.2971	1.17481	94.6432	0.0348925	35.65	9.84076	89.8916	2.30802	59.4247	17.4126	10.9025	1
230200	2012	44.4877	100.557	16.277	91.06	2.53248	16.7352	8797	6.14253	43.2593	1.26463	114.37	0.0551329	35.63	9.95395	89.8154	2.09331	62.7416	21.5992	11.3033	1
230200	2013	44.448	100.334	18.1996	92.7562	2.47472	18.1266	9984	4.99368	42.5875	1.33748	103.771	0.0600178	35.48	10.0029	90.8908	2.26943	59.4744	19.4296	11.7721	1
230200	2014	44.3118	99.9921	0.600607	94.9733	2.43079	19.019	11310	5.12473	42.2172	1.41739	104.216	0.0449391	35.5	9.99245	92.123	2.23245	57.9123	19.3047	11.2041	1
230200	2015	44.4969	99.715	1.94929	97.7231	2.54446	21.5119	12106	5.22334	42.8666	1.48493	105.228	0.0545795	38.15	10.0486	92.5533	2.62632	57.3175	20.4188	12.2269	1
230200	2016	44.7247	99.7338	15.4497	102.523	2.53908	22.7109	12943	4.8189	43.5139	1.51824	61.3319	0.0565931	38.42	10.1008	91.7511	2.64433	51.1768	24.0184	13.7989	1
230200	2017	44.9966	99.7934	15.6951	98.0067	2.18671	22.3765	13965	4.66781	43.6266	1.53974	91.0164	0.0737327	38.82	10.1258	89.0192	2.50914	53.6614	25.8784	14.2024	1
230200	2018	42.1004	99.7884	16.0867	116.816	2.20158	24.3983	15283	5.06946	44.7045	1.57558	115.921	0.0783095	38.83	10.138	96.8337	2.8723	56.7403	25.3503	15.4161	1
230200	2019	45.0763	99.7201	16.335	110.015	1.95983	22.0789	16689	4.93508	44.583	1.61992	111.077	0.0921922	38.64	9.97223	97.841	2.58751	54.1189	25.767	15.686	1
230200	2020	46.7099	99.6879	17.6584	104.838	1.88771	23.2515	18057	4.7873	45.0371	1.6972	126.278	0.120085	53.6	10.0427	97.6938	2.84414	52.2786	25.0847	16.6585	1
230200	2021	46.2538	100.115	17.6989	106.385	0.529614	24.3177	19954	5.05823	46.2249	1.70723	106.66	0.142802	37.95	10.073	97.5426	2.90783	51.9118	25.4733	17.9448	1
230200	2022	46.2932	100.534	18.1847	103.797	0.519608	24.732	20790	4.72813	46.3631	1.74036	120.392	0.185407	37.83	10.1539	97.195	2.69099	52.7424	24.8951	18.3385	1
230200	2023	46.735	100.271	18.7138	100.629	0.506641	24.8281	22174	4.79991	46.7368	1.77363	118.513	0.216804	37.76	10.1409	97.4079	2.96886	52.8797	25.5949	19.1264	1
230300	2008	21.9084	99.7541	5.78403	218.979	3.13715	19.8657	5278	5.50596	41.1141	0.765526	116.233	0.0745422	62.89	9.71427	88.5464	2.10521	64.2159	9.71722	8.56801	1
230300	2009	25.273	99.8219	6.36833	198.872	3.15988	17.5211	5736	4.68514	40.0871	0.816763	122.171	0.0793656	62.91	9.82837	96.1286	2.0486	64.61	10.5264	8.07444	1
230300	2010	25.2553	99.9241	6.92159	207.882	3.60067	18.79	7636	5.564	41.7536	0.861672	148.669	0.0986737	63.29	10.0066	96.4376	2.09087	67.3203	14.284	9.7255	1
230300	2011	25.271	99.9418	9.26281	216.593	4.03667	17.6908	10509	6.19649	43.0968	0.930951	179.468	0.109159	63.73	10.1993	96.594	2.16438	65.5761	11.9212	11.4446	1
230300	2012	25.7327	100.013	9.03768	221.24	4.39198	21.5084	10422	6.88405	44.3995	1.00496	214.269	0.119312	63.87	10.3522	97.3873	2.55143	66.0797	13.4129	12.4378	1
230300	2013	26.1859	99.8339	8.82842	219.086	4.3005	23.1685	11985	5.97569	44.041	1.10703	199.372	0.161681	64.07	10.3286	97.7003	2.45925	62.6891	12.4259	13.0924	1
230300	2014	26.228	99.8847	8.61405	226.266	4.37266	20.577	13449	6.34896	44.415	1.15971	211.301	0.163645	64.07	10.2437	97.876	2.67494	61.9904	15.8705	13.4937	1
230300	2015	26.194	99.8317	8.60832	227.338	4.32772	19.9093	14409	6.45667	44.654	1.24269	209.169	0.168638	64.26	10.2515	97.5125	2.35185	61.5446	12.8797	13.8955	1
230300	2016	23.636	99.8906	8.83972	253.291	4.72127	20.0213	15592	6.31273	44.8263	1.29133	64.2178	0.162051	64.82	10.2626	97.8273	2.26328	55.1884	12.9737	14.4178	1
230300	2017	23.0673	99.7311	9.08614	262.505	4.6464	23.49	16482	5.68849	44.8937	1.33799	188.28	0.0150401	64.5	10.3041	97.7616	2.6534	62.1197	13.227	15.2324	1
230300	2018	26.1363	99.7378	9.37181	233.108	3.79961	26.4438	18258	5.85058	46.0758	1.4187	428.939	0.192951	66.01	10.3396	98.0717	2.85016	77.5811	15.1542	16.8322	1
230300	2019	50.2143	99.8214	10.9551	113.218	1.73818	23.6391	19700	6.28333	46.8552	1.51905	139.647	0.197579	66.35	10.394	98.3656	3.11366	76.3959	16.5871	17.7672	1
230300	2020	49.9842	100.057	27.4322	114.744	1.66289	27.4537	21217	6.34334	48.8148	1.68544	174.416	0.223764	72.7	10.4415	98.1788	3.01319	77.6556	12.9135	20.6362	1
230300	2021	51.4811	100.188	43.8331	112.531	1.21868	24.5859	23406	6.43655	49.9164	1.67167	167.273	0.236994	73.2	10.508	97.3267	3.11941	76.9946	14.3665	22.6121	1
230300	2022	52.3563	100.474	60.0009	109.28	1.10898	25.4729	24336	6.31327	51.0857	1.7078	161.388	0.255345	73.9	10.6164	97.5643	2.89974	75.6874	19.1315	24.5419	1
230300	2023	52.2458	100.593	75.9256	107.688	1.10389	25.1019	25869	6.27074	52.2067	1.81156	164.441	0.291903	74.66	10.6004	98.001	3.18488	78.7111	16.0702	26.5316	1
230400	2008	14.0255	99.8898	3.6443	143.014	2.10676	16.5921	7873.97	4.04869	39.7203	0.445285	45.7636	0.102515	80.61	9.73393	97.3519	2.22273	54.2501	9.15702	8.25738	1
230400	2009	16.9415	99.9826	6.30475	117.119	1.76559	20.3643	8369.3	3.5834	40.1638	0.472677	46.2883	0.102416	80.64	9.82516	98.2402	2.27767	54.7867	8.40302	9.27192	1
230400	2010	17.3781	100.128	8.66689	112.765	1.73962	17.3974	8901.34	4.12882	40.5889	0.581728	54.3697	0.119396	80.94	10.0435	97.9572	2.10367	57.3116	12.5652	9.43866	1
230400	2011	17.9201	100.139	13.4655	107.976	1.7046	19.4945	9473.18	5.31362	42.5544	0.636565	61.2124	0.130234	80.72	10.2672	97.3888	2.38513	59.8328	11.1611	11.0831	1
230400	2012	18.1495	100.017	13.3221	105.383	1.70245	17.7178	10088.2	5.74262	42.8303	0.734066	75.6474	0.177417	80.75	10.4048	97.3888	2.21864	63.0462	11.3994	11.2446	1
230400	2013	18.1784	99.8556	13.2001	104.157	1.72188	16.9923	10750	4.37012	41.3774	0.79129	70.5746	0.224035	80.8	10.2984	98.589	2.07408	60.7443	11.5346	10.7793	1
230400	2014	18.2699	99.7539	13.091	102.684	1.73712	21.723	11462.8	4.95906	42.8782	0.918846	80.885	0.240062	80.91	10.0961	99.1064	2.5847	67.4225	14.8084	12.2977	1
230400	2015	18.2983	99.8154	13.0595	101.507	1.75726	19.5117	12153	5.16269	42.9487	0.96743	80.7542	0.235557	81.3	10.1325	98.7891	2.26417	66.6639	14.3801	12.3195	1
230400	2016	18.3501	99.8895	12.8622	100.127	1.77384	21.391	13041	5.10414	43.4371	1.02749	75.9175	0.2366	81.7	10.1423	98.6642	2.50914	65.1158	12.3218	13.0785	1
230400	2017	16.9543	99.8568	12.6686	103.472	2.21474	21.5331	13967	4.76398	43.293	1.03058	78.8445	0.254399	82.52	10.2403	98.5394	2.88181	67.3855	11.6705	13.3679	1
230400	2018	16.9913	99.8641	12.1818	102.73	1.94228	26.4412	15134	5.05161	44.6646	1.06246	255.448	0.268811	82.6	10.2736	98.4146	2.91798	64.9831	12.4316	14.9767	1
230400	2019	17.0047	99.9216	12.1932	105.048	1.9635	25.9932	16466	6.02733	45.9896	1.13197	268.224	0.284137	81.42	10.4425	98.2897	2.90873	63.7015	12.9288	16.0192	1
230400	2020	17.0227	99.8942	12.3316	102.106	1.97411	26.9595	17783	5.9699	46.4225	1.28158	296.316	0.305459	82.63	10.4646	98.1649	2.94401	63.4063	14.4475	16.8447	1
230400	2021	17.023	99.9981	12.4574	104.648	1.76173	23.9644	19463	6.02803	46.5117	1.23274	268.606	0.295582	81.2	10.5153	98.0401	3.19222	62.4955	20.1849	17.1586	1
230400	2022	16.9868	100.213	12.5563	100.33	1.67571	26.1971	20215	5.76395	46.8823	1.28213	283.553	0.315381	81	10.6702	97.9152	3.41066	62.7026	18.7485	17.8468	1
230400	2023	16.9562	100.181	12.6587	96.0128	1.58969	24.4674	21413	5.75109	46.9074	1.30906	256.317	0.338316	80.85	10.6174	97.7904	3.25923	63.9427	14.7565	18.1196	1
230500	2008	20.6442	100.04	2.47546	233.999	3.35337	16.6359	7815.5	4.95732	40.634	0.521643	82.4565	0.084145	62.27	9.75752	87.4355	2.178	54.1135	10.8134	8.68157	1
230500	2009	21.3125	100.104	2.47699	236.722	3.76177	18.3736	8336.82	5.15542	41.2637	0.574355	89.1178	0.0845551	62.48	9.89312	90.6762	1.88481	53.2812	11.2722	9.3772	1
230500	2010	21.4705	100.153	2.79183	244.828	4.24075	18.5957	8893.91	5.81659	42.1508	0.639509	107.985	0.0904348	63.78	10.1715	93.0501	2.19858	56.2766	15.8413	10.038	1
230500	2011	21.5529	100.04	3.63664	253.957	4.73304	16.8305	9489.31	6.38755	42.5978	0.710892	112.636	0.108618	63.98	10.4122	94.6641	2.00342	50.9576	12.4764	10.3373	1
230500	2012	21.5431	99.9901	3.93607	264.265	5.24611	20.5952	10125.7	7.03355	44.0019	0.800376	126.876	0.146402	64.29	10.5346	94.8338	2.28984	50.523	12.8623	11.6945	1
230500	2013	21.5822	99.874	4.24049	265.818	5.21784	18.0421	10806	6.47171	43.1575	0.867736	121.931	0.175183	64.31	10.5202	95.541	2.25658	47.0352	12.9265	11.3099	1
230500	2014	21.6043	99.8975	4.54459	274.691	5.30847	21.8069	11533.3	6.89093	44.3981	0.907174	119.358	0.17663	64.31	10.2764	96.1063	2.60013	57.4841	13.0008	12.6093	1
230500	2015	21.1335	99.8813	4.96727	281.775	5.364	17.5606	12206	7.04547	44.0755	0.955221	116.385	0.184934	57.66	10.2885	95.9272	2.33644	62.5351	13.0246	12.2408	1
230500	2016	21.267	99.9341	5.25209	281.506	5.24719	20.2977	13035	6.50556	44.1994	1.00583	47.6207	0.197799	58.27	10.3144	95.2313	2.40096	62.6811	16.0091	12.9471	1
230500	2017	20.6959	99.9148	5.53835	292.583	5.1788	23.8579	13882	5.46276	43.8907	1.05229	119.289	0.203469	66.27	10.8046	95.8803	2.60133	68.749	16.0361	13.568	1
230500	2018	20.7771	99.8512	5.28322	293.234	4.77966	21.6006	15102	5.43323	43.8045	1.08308	322.644	0.246852	64.61	10.4901	96.5294	2.8203	77.0787	14.3896	13.7158	1
230500	2019	20.8269	99.9817	5.28315	272.972	4.19081	23.1884	16235	5.83541	44.8594	1.11561	136.528	0.272648	65.35	10.427	97.1785	2.75997	76.523	15.5317	14.777	1
230500	2020	20.8595	100.044	5.26949	274.953	3.98467	24.9423	17290	5.91249	45.5271	1.40394	154.015	0.314309	68.4	10.4784	97.8275	2.83298	78.0127	15.2371	15.6741	1
230500	2021	20.8642	100.16	5.24973	277.665	3.00703	27.8622	18927	5.94631	46.5425	1.23356	117.318	0.328082	68.4	10.5365	98.4766	3.18138	76.5336	17.3438	17.0638	1
230500	2022	20.7906	100.521	5.21128	275.197	2.79271	24.1555	19702	5.87133	46.2426	1.23951	123.976	0.36091	69.2	10.6203	99.1256	2.84333	79.0464	16.5708	16.7202	1
230500	2023	20.6924	100.627	5.16764	271.9	2.7872	28.447	20983	6.04079	47.4736	1.247	129.747	0.392477	70.1	10.5858	99.7747	3.24815	81.5344	17.2651	18.2506	1
230600	2008	31.0074	100.291	17.0309	154.362	2.19852	17.1972	8519.31	7.04293	44.0423	1.11339	76.3299	0.0198865	49.35	11.2909	75.377	1.90603	45.6495	6.55186	11.502	1
230600	2009	33.7861	100.371	20.6465	148.415	2.35252	19.74	9071.75	6.58863	44.3318	1.20076	64.7248	0.00162226	49.59	11.2341	86.2374	2.30251	45.5762	7.78498	12.3931	1
230600	2010	35.1657	100.356	22.8107	149.048	2.5799	17.5453	9661.2	7.72873	45.4335	1.29743	86.8982	0.00652427	50.39	11.5488	90.3278	2.30149	47.7393	10.2693	13.0091	1
230600	2011	35.5248	100.232	26.7205	154.076	2.87153	16.4219	10290.2	8.5454	46.4039	1.37283	102.569	0.0166458	50.95	11.7971	88.4367	2.12322	46.6327	9.65427	13.8192	1
230600	2012	36.2352	100.433	24.7072	157.115	3.119	18.431	10961.5	9.66464	48.048	1.44349	120.29	0.0186717	51.38	11.8642	89.5052	2.44912	49.5181	10.614	14.9126	1
230600	2013	36.0479	100.478	22.7008	159.148	3.12396	20.3257	11678	7.67478	46.3672	1.51246	121.316	0.0290407	51.6	11.9047	90.1058	2.1817	42.0867	10.633	14.5274	1
230600	2014	36.3292	100.057	20.7999	163.354	3.15685	21.9	12442.9	7.70819	46.5819	1.55822	133.556	0.0293791	52.1	11.9032	91.3668	2.49692	42.2589	10.7438	15.0601	1
230600	2015	36.2513	99.5344	22.2783	164.267	3.12707	21.5245	13204	7.62569	46.4904	1.62064	123.188	0.0354536	51.3	11.5927	93.7614	2.41187	42.1165	11.3828	15.4368	1
230600	2016	36.4259	99.5576	23.8868	164.355	3.06354	20.4989	13909	6.40541	45.3266	1.65315	85.6418	0.0393576	52.4	11.457	92.251	2.2974	39.2385	12.0937	15.158	1
230600	2017	34.8933	99.7765	25.4532	173.537	3.07164	21.6182	14757	6.46772	45.9452	1.73943	121.922	0.0594525	52.9	11.4946	90.5109	2.43037	43.5352	14.2559	15.9324	1
230600	2018	34.6259	99.7552	26.2272	175.954	2.86802	24.4444	15978	6.256	46.5236	1.79131	131.648	0.0664263	52.82	11.5387	92.5317	2.80277	44.4344	13.3742	17.0374	1
230600	2019	37.163	99.3234	26.5694	152.978	2.34861	26.5072	17368	6.48938	47.339	1.83964	143.083	0.0812005	52.8	11.4554	92.034	3.14071	42.0642	12.1027	18.2922	1
230600	2020	38.5368	99.1034	27.3033	148.829	2.15686	23.6317	18584	6.42002	47.0956	1.96152	170.9	0.100729	72.5	11.3456	90.5457	2.79958	42.7586	11.7562	18.401	1
230600	2021	39.3036	99.8422	27.8408	147.397	1.59627	27.0598	20424	6.56026	48.6293	1.86224	185.715	0.142406	72.48	11.4755	88.2791	3.0758	44.9137	9.64318	20.1142	1
230600	2022	39.5524	100.558	28.1779	144.656	1.46798	24.1868	21169	6.49666	48.6294	1.73164	200.492	0.171737	72.88	11.6409	88.2377	2.82853	46.7722	11.6043	19.965	1
230600	2023	39.7307	100.677	28.4768	141.609	1.45162	27.6277	22430	6.49388	49.565	2.07725	198.031	0.219163	73.9	11.5972	87.3343	3.14036	47.1821	12.3869	21.2767	1
230700	2008	44.3482	99.5094	6.45333	104.093	3.45051	19.1762	5371	3.47938	38.9932	1.03145	217.86	0.00807205	85.7	9.54865	89.6446	2.24611	49.9424	22.2193	7.95931	1
230700	2009	52.0241	99.8554	5.40357	91.0022	2.64652	16.755	6139	3.03265	38.5278	1.1073	207.466	0.0143087	85.77	9.51389	94.8445	1.87693	49.9386	18.2806	7.72853	1
230700	2010	52.2647	99.5396	5.66742	93.1411	2.34739	16.8727	7280	3.51998	39.2522	1.29135	270.373	0.0494	85.93	9.67699	94.7963	2.11654	54.1271	17.1894	8.56762	1
230700	2011	53.4966	98.8176	9.63784	94.1997	2.02503	18.386	8630	3.86044	40.1149	1.45842	277.901	0.03562	85.95	9.80838	94.9021	2.30471	55.9305	13.4972	10.0172	1
230700	2012	54.1118	98.777	10.2399	96.3982	1.73079	17.7469	9232	4.20017	40.5575	1.52475	330.64	0.0515888	86.81	9.94124	94.6415	2.17713	58.0982	13.2908	10.416	1
230700	2013	53.962	99.5817	10.7677	99.2031	1.44482	22.9699	10043	2.99586	40.7016	1.67659	348.083	0.0675326	86.86	10.0472	95.1307	2.49262	57.3371	11.9392	11.3079	1
230700	2014	53.7898	99.4637	11.3131	102.207	1.15662	21.6647	11368.3	3.33066	41.1835	1.73369	350.457	0.0723887	86.97	9.9516	95.736	2.24103	57.1103	15.7724	11.9199	1
230700	2015	54.7583	98.4147	11.1302	104.202	1.20448	18.657	12001	3.3468	40.4505	1.83214	357.351	0.077891	57.05	9.9272	96.4253	2.40748	56.7071	11.5633	11.6466	1
230700	2016	55.2365	99.5921	11.4496	101.806	1.22383	19.5266	12827	3.22242	41.183	1.8456	220.051	0.410528	58.37	9.96597	95.1951	2.28864	54.5806	16.7741	12.2329	1
230700	2017	49.5221	99.7529	11.7525	112.812	1.23855	20.1338	13725	3.18389	41.5156	1.719	358.758	0.0986422	81.19	10.0103	95.4948	2.58924	55.8637	16.7885	12.7117	1
230700	2018	47.6815	99.9172	12.3462	122.104	1.19581	23.6267	15017	3.36439	42.6782	1.76733	436.884	0.10838	80.94	10.0878	95.7946	2.86846	59.1854	16.3661	14.1263	1
230700	2019	46.4748	100.212	14.0545	135.768	1.87804	21.5711	16188	3.13909	42.5901	1.86292	410.027	0.128041	81.7	10.1923	96.0943	2.88352	58.0609	15.4981	14.3449	1
230700	2020	45.5621	100.557	13.0071	126.382	1.82429	23.885	17386	3.25243	43.4787	2.21788	466.026	0.149213	84.7	10.1934	96.394	2.85477	58.1194	9.2757	15.3432	1
230700	2021	44.6326	101.201	11.8946	131.017	1.40568	21.5781	19406	3.6392	44.278	2.17602	490.138	0.173031	84.65	10.2934	96.6937	2.74257	58.5128	10.3535	16.0092	1
230700	2022	43.4211	102.25	10.6958	135.006	1.33719	24.4014	20149	3.29955	44.9347	2.18238	502.42	0.178087	86.9	10.3752	96.9935	2.95954	59.2388	11.5396	16.6657	1
230700	2023	42.4744	101.902	9.57658	138.746	1.35785	22.031	21367	3.49106	44.8752	2.25091	506.639	0.203281	87.2	10.4184	97.2932	2.80014	62.0855	12.7144	16.7981	1
230800	2008	29.9076	99.937	5.03696	92.4435	2.82962	16.2865	8280.45	4.43849	40.3559	0.562368	62.9934	0.055875	49.29	9.67005	89.9455	2.04217	66.3097	15.4192	8.96984	1
230800	2009	33.1073	99.9608	5.33981	89.841	2.52284	15.5285	8840.93	3.99938	39.9831	0.678049	67.5948	0.0660192	49.21	9.74983	94.9827	2.13347	65.1684	16.4956	8.9802	1
230800	2010	33.1546	100.028	6.7894	95.9755	2.48428	17.6211	9442.35	4.79258	41.4004	0.75502	79.3134	0.0580334	49.99	9.91309	95.6608	2.38859	66.7254	22.1592	10.1719	1
230800	2011	33.9443	100.126	10.7814	99.7592	2.39003	18.0128	10087.9	5.90094	43.036	0.880063	98.5484	0.0738406	50.29	10.1251	96.1233	2.24713	67.5463	18.8568	11.4346	1
230800	2012	29.6504	100.146	11.2399	121.052	2.69395	19.5232	10781.1	7.82147	45.4532	0.887151	110.898	0.0917727	50.1	10.2374	95.6551	2.17806	67.9289	17.4398	12.9351	1
230800	2013	29.6128	100.127	11.6993	128.064	2.65576	20.6205	11525.6	6.16753	44.1012	0.951781	121.682	0.104555	50.33	10.3957	96.2482	2.27574	65.2258	21.5068	12.7747	1
230800	2014	29.5743	100.128	12.1575	135.079	2.61762	23.7037	12325.6	6.41627	45.0789	1.0185	131.65	0.108795	50.57	10.365	97.0878	2.68096	66.7074	18.1282	13.9123	1
230800	2015	29.5534	100.047	12.043	142.124	2.58002	23.1469	13125	6.44351	45.1904	1.11135	111.494	0.114462	58.77	10.4372	97.9742	2.72723	64.3556	18.884	14.2075	1
230800	2016	29.467	99.9995	12.1753	144.803	2.53236	18.7463	13912	6.22486	44.4631	1.21602	108.852	0.121699	58.46	10.4774	96.406	2.41838	60.5596	23.8636	13.6734	1
230800	2017	27.7155	99.9317	12.3159	188.142	3.05637	20.1724	14872	5.67047	44.2911	1.26286	97.2491	0.142691	55.33	10.6505	96.8589	2.686	63.0208	22.8408	14.1425	1
230800	2018	27.5294	99.8597	15.971	186.4	2.88065	23.5315	16315	5.7251	45.4095	1.48985	181.047	0.159386	53.09	10.679	97.3122	2.73881	76.1936	26.8596	15.8218	1
230800	2019	27.3842	99.9293	16.1124	274.113	2.66144	23.5803	17702	5.89735	45.9853	1.54923	140.148	0.170576	52.2	10.3966	97.7654	3.00585	74.3713	28.3053	16.6164	1
230800	2020	27.2602	100.013	16.0861	269.284	2.86732	25.6957	19196	5.973	46.8136	1.64905	173.637	0.210805	65.2	10.4696	98.2187	3.07235	74.4541	26.6742	17.7975	1
230800	2021	27.134	100.139	15.7798	269.164	2.36798	21.9744	21154	6.0408	46.8732	1.71916	153.655	0.236342	65.17	10.4854	98.672	2.86255	73.5309	23.6254	18.0805	1
230800	2022	26.9792	100.334	15.4444	276.595	2.31509	25.247	21958	5.83933	47.4518	1.76847	162.908	0.249986	52.1	10.5571	99.1253	3.1664	73.9456	26.574	18.9826	1
230800	2023	26.833	100.368	15.1058	283.88	2.2605	22.4356	23362	5.84937	47.3864	1.79096	171.842	0.299265	51.9	10.6005	99.5785	2.92263	75.3926	26.8254	19.1279	1
230900	2008	34.8578	99.8567	2.99248	138.142	1.98698	16.1135	6985.78	4.43124	39.9076	0.950443	119.298	0.00520132	56.43	9.94006	88.8838	2.19957	59.8174	9.04442	8.19955	1
230900	2009	38.8018	99.8393	2.96975	129.503	2.06108	18.0428	7414.28	4.11761	40.0101	0.968956	110.698	0.00977677	56.75	10.1339	92.6788	2.10141	57.9456	9.80009	8.69591	1
230900	2010	40.3578	99.6198	2.99491	130.006	2.25285	18.8166	7874.37	4.48477	40.5482	1.05121	125.108	0.0800332	57.94	10.4003	91.9124	1.94347	59.7973	10.0544	9.26709	1
230900	2011	39.8961	99.5594	4.77141	137.194	2.5569	16.2399	8368.7	4.82287	40.6697	1.22988	112.97	0.0746487	58.67	10.4113	91.26	2.03844	57.1682	9.67425	9.32199	1
230900	2012	41.1957	99.7178	4.67817	138.197	2.74343	19.7743	8900.19	5.4025	42.0337	1.29926	158.804	0.0959767	58.93	10.3843	91.4667	2.44485	57.2494	9.58709	10.5477	1
230900	2013	41.4074	99.6597	4.58703	138.549	2.71962	21.866	9472.04	4.84912	41.9061	1.39939	81.3011	0.100519	58.78	10.1733	92.1106	2.39201	57.2494	11.7424	10.9641	1
230900	2014	41.556	99.6715	4.49469	142.808	2.75979	21.5879	10087.7	5.50787	42.7131	1.49932	72.3799	0.115708	58.82	10.0979	92.4052	2.67324	53.6853	10.7588	11.5241	1
230900	2015	41.8806	99.5479	4.59958	142.187	2.70674	20.563	10687	5.7373	42.9078	1.61455	79.315	0.125784	56.69	10.1498	91.8846	2.59368	50.7735	12.891	11.7483	1
230900	2016	42.6491	99.7565	4.73667	140.373	2.61652	22.9299	11405	5.75578	43.5908	1.62602	58.569	0.130773	58.07	10.2066	88.5453	2.8422	46.7773	12.8346	12.5942	1
230900	2017	42.7059	99.5682	4.88361	141.79	2.50972	23.7355	12169	5.12657	43.1917	1.70253	65.729	0.157778	62.24	10.2739	88.6265	2.82104	50.5526	13.8601	12.8411	1
230900	2018	42.8299	99.6279	4.9564	142.25	2.31865	23.7248	13230	5.19692	43.5799	1.89292	87.0867	0.189766	62.05	10.3764	88.7078	3.01817	56.0356	11.5345	13.4126	1
230900	2019	42.8726	99.8908	5.42476	132.606	2.03583	22.5918	14340	4.87868	43.5072	2.20243	92.1319	0.178507	61.9	10.309	88.789	2.52519	54.265	10.976	13.6505	1
230900	2020	42.8626	100.022	5.51138	133.809	1.93918	23.0396	15473	4.96947	44.0331	2.29095	113.245	0.218675	77.16	10.2075	88.8703	2.69338	57.2272	9.92045	14.3552	1
230900	2021	42.8157	100.109	5.59308	135.307	1.46533	26.0482	17238	4.89328	44.9505	2.30954	138.354	0.246911	61.5	10.3353	88.9515	2.819	59.8527	12.9862	15.7803	1
230900	2022	42.582	100.549	5.6498	134.365	1.36354	27.4109	18036	4.87565	45.545	2.34504	164.158	0.28947	61.4	10.501	89.0328	3.45319	62.7403	13.3152	16.4421	1
230900	2023	42.1518	101.02	5.67909	133.476	1.36824	26.5949	19255	4.96783	46.0287	2.36991	167.277	0.321675	61.2	10.4873	89.114	2.87816	62.8244	13.7375	16.9488	1
231000	2008	39.6372	99.4148	5.52923	110.989	5.54968	15.8603	9069.67	4.8472	40.6648	1.1598	135.821	0.0369307	54.97	9.839	82.1336	2.06247	66.7547	9.03325	9.66406	1
231000	2009	47.2246	99.5762	6.19966	94.8395	4.78907	17.3	9722.17	4.50384	40.8892	1.27228	142.909	0.0176228	54.74	10.0544	86.6024	1.8047	69.4013	10.433	10.29	1
231000	2010	49.3265	99.4051	6.44054	92.58	4.71955	15.8039	10422.8	5.10988	41.4306	1.38094	185.76	0.0330833	54.83	10.2509	84.686	2.10019	73.1993	12.5525	10.6926	1
231000	2011	53.2097	98.767	6.87586	88.0574	4.53027	17.6597	11175.2	4.67067	41.2488	1.51671	223.223	0.0267206	55.01	10.4686	85.6005	2.0302	72.574	10.4072	11.2976	1
231000	2012	54.6514	98.263	7.089	88.4016	4.58834	19.7097	11983.2	5.60367	42.5678	1.76352	275.43	0.0424442	54.96	10.5398	84.1658	2.54097	75.7112	10.971	12.556	1
231000	2013	55.6841	98.5473	7.28645	89.188	4.66883	18.9087	12851.1	5.11535	42.2885	1.96997	277.299	0.0626319	56.32	10.7569	83.6766	2.1799	76.0711	10.8581	12.6505	1
231000	2014	57.1535	99.2326	7.43646	88.6931	4.68137	21.8155	13783.5	4.97857	43.1489	2.27035	288.414	0.0688685	55.3	10.7764	84.562	2.42636	75.0809	14.3108	13.659	1
231000	2015	57.2851	99.6285	8.17726	88.5406	4.79331	19.3299	14711	5.09954	43.3252	2.46302	319.947	0.0363985	58.13	10.8203	84.8018	2.3021	76.4307	14.2945	13.7833	1
231000	2016	57.8949	99.8773	8.66815	88.2328	4.82534	21.4708	15688	5.06711	44.0143	2.51497	323.463	0.0853184	58.18	10.8747	77.7996	2.27594	75.8845	15.0958	14.7195	1
231000	2017	58.082	99.6211	9.18379	89.902	4.75443	22.5674	16896	4.79772	44.1433	2.58293	253.546	0.0823894	61.85	10.873	77.5764	2.86591	72.9134	14.9049	15.4432	1
231000	2018	56.9839	99.7326	10.3855	92.3318	4.6771	26.0671	18458	4.6957	45.097	2.77906	239.324	0.0814663	60.32	10.8531	90.4804	2.95223	73.5646	13.5429	16.9225	1
231000	2019	61.6197	100.223	10.3588	87.8628	4.30113	22.7054	20045	4.71921	45.2607	2.86383	247.648	0.108011	60.3	10.4043	90.9656	3.0539	72.7345	13.5729	17.1808	1
231000	2020	62.3849	100.825	10.274	86.5597	4.2292	23.2067	21729	4.62779	45.941	3.00844	273.607	0.119112	65.8	10.4248	90.9382	2.89971	72.1301	12.6989	18.0976	1
231000	2021	62.5992	101.089	10.2219	87.6549	3.8189	25.801	23832	4.58663	46.9849	3.06335	308.922	0.146955	65.81	10.4874	90.5913	2.96795	74.3544	11.5577	19.6281	1
231000	2022	62.0855	101.88	9.62707	87.1226	3.71124	23.2385	24468	4.67609	47.1455	3.08496	343.66	0.167259	60	10.5564	90.5502	3.09603	75.9448	11.839	19.4675	1
231000	2023	61.6363	101.694	9.0673	86.3586	3.60848	26.3425	25870	4.47543	47.6879	3.09481	334.435	0.238822	59.9	10.5354	90.3227	3.03024	75.9561	13.6741	20.6031	1
231100	2008	26.7257	100.231	0.519709	179.258	2.54723	17.6982	7290.88	2.48382	38.144	0.565748	83.5658	0.0809848	35.3	9.3779	95.6566	2.00829	78.7148	15.3557	7.40587	1
231100	2009	34.7016	100.179	0.685757	145.221	2.29975	17.0968	7853.14	2.0083	37.7552	0.629399	77.8328	0.0765767	35.29	9.46266	98.2104	1.99786	78.497	15.9398	7.49701	1
231100	2010	35.583	100.502	0.98812	148.107	2.56294	17.9032	8459.52	2.36273	38.5551	0.666841	79.1126	0.0821106	35.29	9.61498	97.6717	2.30569	78.9224	24.3706	8.168	1
231100	2011	37.0752	100.958	1.67529	147.633	2.75145	19.2767	9113.56	2.90547	39.7364	0.709079	116.605	0.0974328	35.3	9.80373	95.9269	2.17992	79.9274	22.9582	9.10445	1
231100	2012	37.1476	100.594	1.79184	153.256	3.04239	21.2635	9819.07	3.49016	40.6866	0.740892	138.486	0.128719	35.49	9.96106	95.7464	2.2259	82.1442	22.0252	10.1086	1
231100	2013	37.4604	100.148	1.91545	153.147	3.00617	22.36	10580.2	2.73079	40.0863	0.796614	126.247	0.14194	36.91	10.031	96.9735	2.44204	78.8669	24.4054	10.343	1
231100	2014	37.8936	99.6673	2.04854	156.61	3.02653	18.4307	11401.3	2.72852	39.4883	0.837925	137.867	0.141697	42.07	10.1151	98.3977	2.2034	77.8055	24.7451	10.0137	1
231100	2015	38.8953	99.6537	2.59657	153.1	2.91449	18.0394	12177	2.70573	39.6397	0.880364	138.789	0.149876	60.81	10.1908	98.5946	2.20397	75.9985	28.4106	10.3786	1
231100	2016	40.2276	99.628	2.69066	148.823	2.77402	20.2734	12969	2.33341	39.8181	0.917999	69.0142	0.0611689	61.3	10.271	97.4957	2.34653	73.2868	30.9435	11.0523	1
231100	2017	34.5259	99.7653	2.78158	175.383	3.10433	19.7644	14007	2.54918	40.2404	0.938878	140.673	0.176606	57.82	10.321	96.7777	2.46696	73.5851	38.2793	11.491	1
231100	2018	40.2819	99.649	2.8755	151.248	2.46531	24.0651	15268	2.93953	41.6843	0.976548	223.446	0.18916	58.44	10.3663	96.5268	2.82664	73.3778	38.0435	13.2215	1
231100	2019	41.504	99.9145	2.87702	136.978	2.10296	20.8475	16734	2.84663	41.6042	1.02836	246.509	0.198168	58.76	10.509	96.2759	2.42387	73.1143	31.1638	13.3303	1
231100	2020	42.6119	100.19	2.87093	134.596	1.95059	22.4245	18247	2.82963	42.3607	1.16739	170.879	0.209216	65.2	10.5821	96.025	2.8127	73.7882	30.5268	14.4035	1
231100	2021	43.4022	100.915	2.84428	133.478	1.44553	24.6718	20528	3.2665	44.0997	1.20047	155.484	0.23408	65.21	10.6302	95.7742	3.04448	74.9774	31.2528	16.2066	1
231100	2022	43.6182	102.202	2.7824	131.173	1.33114	26.0477	21233	2.92627	44.6853	1.2549	161.629	0.270769	65.71	10.6787	95.5233	2.95608	75.5588	33.0562	16.6941	1
231100	2023	44.0142	101.713	2.73495	127.828	1.31034	25.1897	22718	3.09705	44.917	1.29948	138.533	0.287803	66.91	10.6815	95.2724	3.10838	75.121	35.1578	17.3438	1
231200	2008	44.1726	100.402	8.55058	109.351	1.56192	18.7721	6979.77	7.10366	43.7084	0.74765	60.3093	0.0334106	26.27	9.14703	91.7313	2.14066	52.1267	14.7843	10.5862	1
231200	2009	46.583	100.415	7.92269	108.294	1.71858	19.6335	7470	6.57391	43.4009	0.821975	62.8608	0.021149	26.8	9.25373	96.7832	2.10032	51.1178	18.3527	10.7348	1
231200	2010	47.0724	100.407	9.29757	111.691	1.93391	15.9583	7997.41	7.75162	44.252	0.912011	77.2333	0.0287128	26.32	9.43439	97.2466	1.99354	52.0598	23.4469	10.9773	1
231200	2011	48.646	100.318	12.4123	112.517	2.097	19.836	8564.99	8.14151	45.5357	1.0135	96.6457	0.0269815	26.34	9.65978	96.6934	2.11448	51.6192	20.023	12.459	1
231200	2012	49.8812	100.229	12.4794	114.133	2.26574	18.3266	9176.02	9.04228	46.3689	1.16557	116.639	0.0366205	26.68	9.85189	96.834	2.43837	53.9039	21.0111	12.9258	1
231200	2013	50.2319	99.9501	12.5811	114.209	2.24185	21.7545	9834.05	7.05378	44.8878	1.29039	114.649	0.0506683	26.63	9.96575	97.4633	2.62923	51.6945	19.839	12.976	1
231200	2014	50.1636	99.8204	12.6994	118.303	2.28624	21.8009	10543	7.15946	45.14	1.42358	120.729	0.0445903	26.59	9.97654	98.0191	2.42917	51.9806	21.8293	13.3939	1
231200	2015	50.2863	99.6202	13.721	118.42	2.25429	21.0284	11271	7.15811	45.1764	1.5078	124.956	0.0441323	27.09	10.0517	98.675	2.21558	52.0908	22.0237	13.6918	1
231200	2016	50.0829	99.7111	14.7448	119.537	2.22815	19.4835	12014	6.71858	44.7548	1.61267	133.96	0.0778218	27.6	10.0958	96.4375	2.30022	48.9392	28.6874	13.6478	1
231200	2017	48.9752	99.8884	15.7465	123.64	2.18845	21.289	12831	6.18964	44.8148	1.72955	131.247	0.0869211	25.34	10.1393	95.3295	2.3519	55.1676	26.024	14.2184	1
231200	2018	48.7367	99.9649	15.9826	125.01	2.03763	23.559	14002	6.14568	45.4812	1.90951	144.683	0.0736535	25.21	10.1638	94.2215	2.53903	58.1435	25.9574	15.2308	1
231200	2019	48.5676	99.9092	15.9619	117.056	1.79711	22.015	15262	6.01512	45.4196	2.06785	157.475	0.105842	25.03	9.95665	93.1134	2.7973	55.9106	26.8583	15.5013	1
231200	2020	48.4898	99.7928	15.5846	118.28	1.71414	23.7478	16616	6.0564	46.0267	2.20255	178.737	0.131645	43.7	10.0088	92.0054	2.81793	55.4294	24.5772	16.4903	1
231200	2021	48.357	99.9658	15.1794	119.802	1.29742	23.4058	18475	6.36472	46.8541	2.38424	190.945	0.152919	43.66	10.0416	90.8974	2.63727	56.8988	23.4178	17.4696	1
231200	2022	48.115	100.243	14.733	118.913	1.20674	23.6858	19154	6.34695	47.1546	2.48582	205.945	0.231383	44.24	10.1011	89.7894	2.75654	58.635	22.4303	17.8207	1
231200	2023	47.9166	100.197	14.2953	117.417	1.20363	23.8971	20379	6.47945	47.6066	2.55133	200.736	0.281894	45.49	10.1042	88.6814	2.69263	58.5961	23.5885	18.4949	1
310000	2008	99.68	99.1539	59.0087	420.239	17.9796	48.3497	11250	6.63609	50.4508	2.399	92.0646	0.532503	88.6	11.4975	46.5207	5.49339	49.2835	3.04443	23.1464	1
310000	2009	105.9	98.7226	51.5786	380.164	16.5262	51.8108	12256	6.28143	50.4622	2.52973	113.629	0.549412	88.6	11.5845	51.8873	6.10527	52.4743	3.59407	23.6203	1
310000	2010	107.602	98.4614	52.0428	428.221	15.8261	52.5447	13702	6.56791	51.2018	2.69431	127.537	0.627957	89.27	11.708	48.4046	6.27557	54.0035	4.59991	24.6769	1
310000	2011	110.275	98.6205	56.1707	387.972	14.6823	54.1262	15737	6.53704	52.2973	2.77453	134.783	1.49257	89.3	11.8148	49.5893	5.92785	51.7365	4.12631	26.3702	1
310000	2012	107.365	98.2135	53.2014	359.725	14.2267	57.576	17452	6.5331	52.9806	3.01346	152.787	1.22383	89.31	11.8596	51.8225	6.21649	52.3371	5.20958	27.5745	1
310000	2013	107.249	97.5309	50.4562	399.591	14.2244	56.1128	19208.3	6.75328	53.0139	3.10181	157.713	1.40109	89.6	11.9239	48.6839	6.92783	51.9822	4.13482	28.0319	1
310000	2014	104.706	96.8296	52.1082	409.721	14.4224	55.0965	21191.6	6.81239	53.1963	3.33329	165.269	1.79527	89.57	12.0065	50.4609	6.44987	51.0385	4.10973	28.9326	1
310000	2015	103.423	95.9662	55.5137	459.274	13.4839	59.7258	23205.2	6.9165	54.3889	3.51027	162.003	2.38112	87.61	12.0674	51.7112	6.58987	51.2221	4.3183	31.1002	1
310000	2016	93.2291	96.1093	58.2521	540.786	14.9319	67.5118	25520.4	7.05326	56.4056	3.75365	153.95	1.9708	87.89	12.1773	52.1693	7.76017	48.7236	4.73208	33.8521	1
310000	2017	89.6767	97.5172	60.031	610.212	13.3357	60.8892	27825	7.49437	57.1379	3.83443	158.231	2.15485	87.71	12.2574	46.724	7.46687	50.0325	6.04866	34.0847	1
310000	2018	89.7234	99.008	60.6325	557.764	12.233	66.2443	30374.7	7.98799	59.8805	2.98696	172.761	2.35152	88	12.3173	46.0091	7.50143	51.8302	5.62627	36.6984	1
310000	2019	83.6924	99.2759	61.0747	596.809	11.9018	59.725	33195.2	8.16989	59.8863	3.13906	186.766	2.77294	88.1	12.4674	44.9023	8.0909	51.1901	6.39543	36.9023	1
310000	2020	82.0353	99.5884	53.0644	686.628	12.3961	71.365	34911.3	8.0028	61.6785	3.28321	192.888	2.64731	89.3	12.4735	44.7797	8.32258	49.3174	5.84786	39.2055	1
310000	2021	84.9102	100.094	52.0286	140.723	11.1557	77.4693	38520.7	8.00477	63.955	3.30005	212.261	3.45342	89.3	12.5757	44.4033	8.7467	53.8951	5.40597	42.148	1
310000	2022	86.0647	100.457	51.3568	133.744	11.1454	68.3699	39729.4	7.78194	62.7366	3.20349	220.799	4.21406	89.3	12.6011	45.6254	9.0453	54.5681	4.13727	40.8995	1
310000	2023	87.0502	100.348	51.4909	131.772	10.981	82.3651	42988.1	8.00975	66.0059	3.35742	218.75	4.87583	89.46	12.6502	46.5483	8.85988	53.8761	4.1411	45.3103	1
320100	2008	76.2716	99.2094	41.7485	74.0925	6.27554	17.2566	8951	6.83613	44.8199	4.33026	103.191	0.0428296	76.95	11.0096	47.8353	2.22045	54.2228	5.75036	14.3997	1
320100	2009	74.9398	99.4358	41.2839	73.6609	6.23026	18.1621	9858	6.87943	45.3111	4.4447	126.722	0.0503719	77.16	11.115	47.0633	2.18419	54.9095	6.12006	14.9906	1
320100	2010	73.9358	99.4012	41.8392	77.874	6.57361	16.0973	11128	6.86736	45.2965	4.54733	150.694	0.14186	77.93	11.3038	48.0524	2.1323	56.9718	5.94083	15.2567	1
320100	2011	73.6624	99.3862	44.9554	83.9592	6.95503	19.3396	13108	6.96241	46.5497	4.67327	187.576	0.157647	79.73	11.478	48.4804	2.3643	57.3019	6.61653	17.1567	1
320100	2012	73.3041	99.5535	43.6994	85.4995	7.57373	17.5341	14786	7.19094	46.9238	4.8041	218.415	0.177655	80.23	11.6333	49.6808	2.26723	57.5959	6.6276	17.6561	1
320100	2013	73.0304	99.0228	42.6586	86.8111	8.0069	19.4823	16011	7.24822	47.318	4.90846	249.128	0.258612	80.5	11.7327	49.7272	2.44361	58.4194	6.7845	18.559	1
320100	2014	73.4757	98.2145	49.7042	89.0475	8.23405	23.716	17661	7.30189	48.4693	5.0646	276.173	0.266889	80.92	11.8202	49.0019	2.56904	56.808	6.29939	20.7761	1
320100	2015	74.7244	97.182	51.5982	91.2686	8.31229	18.4452	19483	7.30171	47.7834	5.29518	314.939	0.272104	81.4	11.9102	49.2963	2.32192	57.7735	5.37219	20.8377	1
320100	2016	70.1776	97.1947	53.7862	98.5722	9.03717	18.5954	21156	7.05913	48.0393	5.52225	342.22	0.289469	82	11.973	52.9127	2.28904	57.3515	5.58424	21.692	1
320100	2017	66.5754	98.1659	54.1115	103.914	9.65215	25.5698	23133	7.1775	50.1474	5.67313	372.304	0.299202	82.29	12.0554	53.124	2.78489	57.1529	6.17241	24.0491	1
320100	2018	67.5425	98.8206	55.4226	101.373	9.69414	21.1887	25263	7.06302	50.239	5.79286	348.182	0.34369	82.5	12.1223	56.0542	2.52081	52.9841	6.05721	24.3737	1
320100	2019	63.572	98.9832	55.9161	101.723	9.65819	23.5448	27636	7.22052	51.4651	5.89734	414.135	0.659041	83.2	12.1941	53.1518	3.1886	50.9554	5.28084	26.0585	1
320100	2020	63.9308	99.3914	56.4517	100.049	9.09814	22.0252	29621	7.2515	52.0038	5.98048	467.747	0.901686	86.8	12.2319	53.6464	2.49627	52.5955	5.38236	26.8401	1
320100	2021	65.6635	100.668	56.0647	95.2773	8.70702	25.497	32700.8	7.2099	53.8576	5.98072	500.12	0.998361	86.9	12.3142	52.5306	2.71431	53.8734	5.24555	29.051	1
320100	2022	65.306	101.417	33.8818	83.5292	7.52278	28.0314	34664	7.16518	54.0154	5.97731	528.737	1.17776	87.01	12.3406	52.6976	3.30567	53.7563	5.22724	28.6799	1
320100	2023	65.0432	101.005	12.3583	72.1665	6.37508	26.0322	36789	7.14543	53.075	5.97503	536.79	1.24591	87.2	12.3661	52.6986	2.77128	53.7215	5.21564	27.5668	1
320200	2008	82.9568	98.2749	61.8891	174.795	5.75319	17.6464	11280	6.5881	45.8612	5.33028	82.4939	0.0422485	67.51	11.4638	68.8923	1.95347	45.5494	5.18388	17.2675	1
320200	2009	85.8074	97.9678	65.1681	171.571	5.76138	15.0594	12403	6.77238	45.9918	5.32692	97.0311	0.0573556	67.76	11.5824	66.6069	2.0988	46.5064	5.54451	17.7357	1
320200	2010	89.7504	96.903	65.6037	168.367	5.76712	16.8567	14002	6.77504	46.2994	5.46765	121.749	0.0853349	70.33	11.7294	65.6329	2.10598	48.6776	5.79056	18.9497	1
320200	2011	91.9376	96.299	71.5511	169.756	5.93025	17.2758	16438	7.03035	47.3147	5.40437	152.27	0.100361	72.23	11.8983	65.5366	2.08667	48.9376	6.27756	20.8772	1
320200	2012	98.5672	95.5739	62.9514	164.771	5.86948	20.1054	18509	7.0926	47.695	5.77901	178.134	0.129051	72.91	11.9891	62.9587	2.57378	49.7054	6.91045	21.8612	1
320200	2013	101.517	94.8743	53.7956	168.099	5.94747	17.9413	20223	7.11071	47.102	5.7361	208.819	0.130739	73.7	12.0489	62.6854	2.30334	51.9078	7.35882	21.5932	1
320200	2014	106.968	94.8994	56.0703	162.882	5.84715	18.2602	22266	7.08322	47.8208	6.0137	238.849	0.13124	74.47	12.0552	61.0041	2.33934	54.0185	5.58454	22.9425	1
320200	2015	110.033	94.2051	59.691	162.626	5.68685	22.2181	24155	7.08627	48.8547	6.42953	260.352	0.16715	75.4	12.0846	58.9153	2.80139	56.3906	5.24078	24.9687	1
320200	2016	107.419	94.8485	64.769	169.279	5.90177	20.4332	26158	6.2896	48.7511	6.64848	258.28	0.32284	75.8	12.1522	58.6738	2.58791	56.1263	5.45851	25.65	1
320200	2017	104.608	96.6595	69.8427	176.347	6.06732	22.5457	28358	6.3691	50.7182	6.71841	273.115	0.181348	76	12.2701	57.3824	2.40342	57.935	4.3488	27.6082	1
320200	2018	102.117	98.6857	71.3419	182.598	6.25621	24.8768	30787	6.73465	52.9972	6.76661	243.897	0.189524	76.28	12.3465	58.0175	3.08535	55.11	3.61714	29.5735	1
320200	2019	98.171	98.674	72.4572	190.661	6.32181	25.2898	33574	6.88593	53.9709	6.69309	249.98	0.353458	77.1	12.37	57.6577	2.73233	60.2946	3.55946	31.1414	1
320200	2020	90.4158	98.9872	71.0985	207.31	6.51169	27.6068	35749.7	7.22751	55.2666	6.70596	266.024	0.564775	82.79	12.4009	55.9736	2.92155	59.589	3.63886	32.5942	1
320200	2021	97.058	100.277	109.186	185	5.15548	26.0755	39623.1	6.8782	58.171	6.41118	284.428	0.636941	82.89	12.5132	59.1517	2.87362	61.4685	3.79272	37.3639	1
320200	2022	94.2415	101.885	53.6813	183.957	4.84257	26.7574	41934	6.8569	56.8371	6.31003	295.826	0.801559	81.99	12.5643	60.599	2.76686	61.5943	3.69033	34.0636	1
320200	2023	94.1503	101.465	52.5663	179.795	4.52656	26.6228	44617	6.89019	57.3401	6.25745	300.597	0.904318	83.31	12.5964	60.3272	2.93394	61.5736	3.65693	35.2907	1
320300	2008	106.445	99.3897	50.9957	130.015	4.23319	18.6794	6550.2	5.83858	44.1638	5.54193	37.4493	0.0394648	47.15	9.96176	66.0166	2.04122	62.3507	11.1429	14.2771	1
320300	2009	111.966	99.4453	50.873	128.97	4.30865	17.1546	7252.6	6.20459	44.5414	5.80311	40.2173	0.0648947	49.05	10.125	65.2357	1.9444	62.3749	14.1387	14.5963	1
320300	2010	116.993	99.5513	52.369	128.478	4.39367	17.1812	7955	6.16483	44.8334	6.00043	45.2049	0.0865934	53.16	10.317	64.9674	2.09991	62.8674	13.4287	15.1449	1
320300	2011	118.566	99.6792	54.1511	131.631	4.5984	20.6993	9490	6.26048	46.0293	6.31864	53.1668	0.121375	55.43	10.5013	65.5018	2.24163	60.9633	13.5985	16.8002	1
320300	2012	120.889	99.3439	55.0838	134.346	4.78569	19.2009	10762	6.45737	46.2449	6.61245	64.204	0.171806	56.71	10.6103	64.9579	2.19598	61.5038	15.4533	17.3518	1
320300	2013	122.152	99.1386	56.1425	139.703	4.94279	21.9911	11513	6.18198	46.5573	6.79492	75.0689	0.215109	58.08	10.6932	64.7757	2.37051	61.7304	16.9977	18.2288	1
320300	2014	123.384	99.0567	57.5561	141.21	5.06918	17.5262	12811.3	6.40117	46.4619	8.28622	87.0842	0.223604	59.46	10.7893	65.0243	2.18437	62.5132	16.7261	18.2707	1
320300	2015	128.101	99.1729	56.4523	139.689	4.88476	23.8704	13981.7	6.39602	47.7949	7.55578	96.3765	0.240303	61.05	10.8535	63.4376	2.56424	62.3289	16.5032	20.0467	1
320300	2016	128.461	99.1981	58.0024	141.551	4.93505	22.6763	15274	6.5698	48.2136	7.92573	105.925	0.283369	62.44	10.9295	63.9011	2.74143	62.187	14.7471	20.683	1
320300	2017	129.833	99.3525	59.0524	142.084	4.8885	22.2885	16696.5	6.72817	48.818	8.21425	119.688	0.315275	63.76	11.0601	64.1396	2.56909	62.1159	10.8155	21.5093	1
320300	2018	132.848	99.345	60.3322	140.358	4.80898	25.3012	18206.2	6.32761	49.3501	8.30639	132.381	0.365251	65.1	11.0766	64.9701	2.93563	62.7793	11.012	22.8026	1
320300	2019	133.84	99.2118	61.2285	139.849	4.63702	20.6558	19872.6	6.58353	49.3274	8.51339	124.433	0.740601	66.72	11.1365	64.6742	2.84435	59.5156	11.639	22.9638	1
320300	2020	134.816	99.4832	61.4312	139.035	4.36713	24.8275	21229	6.53627	50.4314	8.73955	136.212	0.989757	65.63	11.1632	65.0553	2.97139	60.0204	10.6899	24.4506	1
320300	2021	134.858	100.102	62.3921	133.145	3.71042	25.4371	23693.9	6.53798	51.5119	8.79569	148.572	1.1558	73.94	11.2699	64.9351	2.59054	62.9585	10.4345	25.897	1
320300	2022	135.124	100.472	61.3322	128.3	3.37742	23.7657	25210	6.53078	51.7605	9.07321	163.677	1.43085	66.8	11.314	64.6519	2.84465	63.5742	9.22835	26.2632	1
320300	2023	134.964	100.34	60.3603	125.424	3.15771	25.971	27065	6.55875	52.5305	9.31475	171.728	1.6539	67.6	11.365	64.5756	2.64491	65.8803	9.52503	27.5352	1
320400	2008	81.3016	99.6984	45.0891	120.283	3.41284	14.7657	10171.2	7.06735	45.5076	5.06338	76.1214	0.0367986	60.96	11.025	68.6807	1.83447	39.3232	7.68697	15.0226	1
320400	2009	80.7266	99.5047	46.4192	120.385	3.86599	16.9953	11198	7.22855	46.256	5.06864	117.562	0.0570646	61.16	11.1567	68.461	2.17991	53.8175	8.15556	16.128	1
320400	2010	81.4635	99.22	47.8985	120.826	4.21609	18.9065	12637.1	7.13137	46.7738	5.29714	134.179	0.0720414	63.9	11.3432	69.8987	2.31541	54.589	7.47584	17.29	1
320400	2011	80.8485	98.6672	49.6749	133.484	4.64592	19.1931	14838	7.22147	47.3198	5.54846	156.338	0.0882393	65.2	11.4996	70.511	2.17562	55.3666	7.09208	18.6074	1
320400	2012	82.2511	98.3599	51.6515	138.882	4.91231	19.0698	16737.3	7.37534	47.9233	5.76052	180.761	0.120595	66.21	11.5975	68.7591	2.30679	55.0228	7.31305	19.7839	1
320400	2013	83.3845	97.6821	50.4022	145.743	5.48691	19.891	18169	7.56499	48.263	5.92027	196.232	0.178806	67.45	11.6884	67.0563	2.43085	54.0304	8.27469	20.6414	1
320400	2014	84.8776	97.1541	52.5711	151.936	5.96779	19.4113	20133	7.60065	48.6114	5.92485	211.085	0.227231	68.7	11.798	66.5614	2.24714	54.0267	7.52307	21.7383	1
320400	2015	85.0522	96.63	54.2818	149.438	6.25641	21.2693	21912.3	7.58605	49.208	5.66038	208.885	0.253263	70	11.8649	66.5098	2.4883	54.1805	8.48078	23.1021	1
320400	2016	85.5554	96.8833	56.5099	153.533	6.59178	18.6305	23780	7.06377	48.9363	5.98111	239.935	0.249428	71	11.9445	63.4751	2.29656	53.6768	9.7578	23.49	1
320400	2017	80.9566	97.6333	58.2952	163.941	7.17649	21.8221	25835	7.21036	50.4719	6.08672	260.408	0.272732	71.8	12.0704	58.3846	2.34623	54.1159	8.07356	25.2805	1
320400	2018	76.8687	98.7354	59.3897	175.798	6.41868	22.6229	28014	7.13678	51.6106	6.09723	279.459	0.278685	72.49	12.1257	60.4393	2.74379	55.3073	7.42917	26.5395	1
320400	2019	72.6149	98.4673	60.2348	179.865	6.75804	26.062	30491	7.2734	52.83	6.00514	261.317	0.523005	73.27	12.1665	56.764	2.81675	54.5147	6.66783	28.4835	1
320400	2020	72.0168	98.7427	60.7649	183.963	6.70645	21.2429	32364	7.34962	52.7817	6.08728	278.243	0.6802	77.07	12.2157	56.8979	2.70008	54.1122	5.09973	28.585	1
320400	2021	75.1515	99.9801	54.8926	158.857	5.33682	24.8379	35822.3	7.30812	54.5304	6.05445	273.566	0.742656	77.6	12.3328	55.2091	3.01776	55.1263	5.2585	30.5801	1
320400	2022	73.3238	101.195	54.932	143.202	4.30008	26.6647	37851.7	7.27082	55.8589	6.03039	174.641	0.906305	78.01	12.4111	56.3757	3.1066	54.0287	4.771	31.9303	1
320400	2023	73.3833	100.942	54.7879	124.239	3.16255	25.3592	40401	7.29682	56.2935	5.92928	178.916	1.00611	78.51	12.4658	56.2413	3.0811	53.2724	4.77323	32.9533	1
320500	2008	91.8226	98.5199	69.5259	168.265	5.24141	16.0122	11785	6.97039	46.6917	5.51772	80.8876	0.0528851	65.95	11.5751	59.6248	1.89707	38.1288	6.37402	18.1764	1
320500	2009	92.3464	98.6152	69.8631	165.756	5.38609	19.0972	12969	7.05566	47.6303	5.57469	95.4612	0.093447	66.25	11.7136	59.2457	2.1709	37.7866	6.8115	19.4317	1
320500	2010	94.4472	97.6816	72.7879	162.008	5.4926	17.6539	14657	7.07581	47.6292	5.67516	109.659	0.103013	70.03	11.8826	59.914	2.29392	38.8083	7.52722	20.2625	1
320500	2011	96.1183	96.9035	62.537	160.316	5.67231	16.233	17226	7.20326	47.3945	5.81534	131.773	0.114321	71.31	12.0249	59.976	1.97524	39.0563	7.84138	20.5001	1
320500	2012	99.0047	95.9467	67.3617	158.207	5.84354	19.1375	19396	7.29425	48.3619	6.35945	152.369	0.183242	72.31	12.1304	60.6911	2.03433	39.9871	7.7739	22.5974	1
320500	2013	101.349	95.6665	72.6947	157.454	5.95733	19.3198	21410	7.3326	49.111	6.49056	176.895	0.240952	73.15	12.2015	59.8804	2.62863	40.7712	8.28578	24.1281	1
320500	2014	104.033	95.6767	75.8603	156.154	6.01207	22.0342	23560	7.30121	50.2417	6.71353	195.934	0.207598	73.95	12.246	59.7937	2.47743	41.1348	7.12813	26.0088	1
320500	2015	108.521	94.8041	68.9846	153.686	5.7661	22.2406	25579.8	7.32107	50.1678	7.09362	211.508	0.22405	74.9	12.2897	59.076	2.50959	41.6337	6.57622	26.5525	1
320500	2016	109.025	96.0288	72.5194	154.931	5.81482	21.9024	27691	6.73609	50.7384	7.40188	239.051	1.04947	75.5	12.3382	60.0704	2.59533	42.1056	5.52591	27.6031	1
320500	2017	104.056	98.6595	76.2513	159.894	6.09949	21.6813	29977	6.83556	52.6403	7.47269	253.697	0.24143	75.8	12.4318	59.3903	2.5764	42.6523	5.73027	29.0476	1
320500	2018	99.4639	100.236	76.0719	162.04	6.42307	21.6214	32420	7.06355	54.1152	7.30121	261.62	0.269405	76.05	12.4843	57.1514	2.55639	43.3173	5.5359	30.3164	1
320500	2019	95.6437	99.6156	76.3655	164.107	6.48886	23.7621	35152	7.33468	55.1803	6.67883	245.205	0.419077	77	12.4915	56.9744	2.61522	45.1767	5.20348	32.1576	1
320500	2020	96.0504	100.068	76.3134	158.269	6.1297	24.474	37563	7.42683	56.228	6.57944	270	0.469142	81.72	12.5123	57.0379	2.69266	48.2057	5.36556	33.5569	1
320500	2021	93.873	101.519	75.1715	154.446	5.3304	23.8171	41486.9	7.28797	57.5818	6.33025	270.969	0.538841	81.93	12.6053	59.6317	2.79278	49.7777	5.1074	35.2397	1
320500	2022	92.9308	102.257	73.5123	147.559	4.91087	27.2936	43784.8	7.20221	58.8834	6.13845	287.405	0.598752	82.12	12.6415	60.9204	3.06826	50.7833	5.24614	36.8749	1
320500	2023	93.2327	101.328	72.5486	140.226	4.57111	24.317	46385	7.18115	58.6604	6.10067	296.107	0.752534	82.48	12.6552	61.8658	2.85139	51.212	5.44619	37.502	1
320600	2008	109.192	99.0259	44.6682	128.184	4.18564	16.8183	7811	5.95506	43.8855	3.91712	55.3172	0.0466394	50.25	10.4002	62.8997	2.00243	41.4299	8.88289	14.1251	1
320600	2009	110.338	99.0412	46.2392	131.436	4.39685	20.2148	8696	6.03338	44.8134	4.10347	63.7414	0.0836352	52.7	10.5366	62.3245	2.32103	41.8333	11.2646	15.3965	1
320600	2010	111.832	98.9313	47.8896	134.427	4.59898	17.0045	9914	6.14509	44.7792	3.99776	80.1095	0.0939304	55.81	10.7238	61.8485	2.03201	43.9564	11.3654	15.6083	1
320600	2011	112.695	98.7226	49.6749	138.489	4.83795	16.7095	11730	6.26168	45.3247	4.43742	88.5757	0.127435	57.6	10.8845	61.7965	2.10119	43.389	11.8536	16.671	1
320600	2012	114.012	98.4302	51.6515	142.451	5.07438	19.2531	13231	6.37593	46.2088	4.72038	99.0128	0.151368	58.66	10.995	61.6579	2.04733	44.4019	11.7509	18.1336	1
320600	2013	115.956	97.9225	50.4022	147.167	5.20689	18.5966	14268	6.41676	46.1533	5.02475	108.576	0.255562	59.9	11.0934	61.6066	2.28306	44.3223	12.184	18.4628	1
320600	2014	117.675	97.6075	52.5711	148.062	5.31513	22.268	15821	6.47878	47.1827	5.45059	118.563	0.260897	61.15	11.207	61.7031	2.5135	44.1393	11.5413	20.1624	1
320600	2015	121.362	96.9829	54.2818	147.446	5.15601	21.1644	17267	6.52292	47.2882	5.83056	125.133	0.271874	62.76	11.2921	61.8465	2.20156	43.7517	10.7454	20.8833	1
320600	2016	123.229	97.1144	56.5099	147.561	5.1446	21.9684	18741	6.26747	47.7088	5.95548	128.369	0.284573	64.37	11.3878	62.962	2.39911	42.6014	9.98772	21.8713	1
320600	2017	123.703	98.0776	58.2952	149.126	5.13076	24.6162	20472	6.29036	49.095	6.2607	136.531	0.297408	66.03	11.5252	63.4741	2.56281	42.3229	9.26081	23.4308	1
320600	2018	120.266	99.468	59.3897	155.042	5.31208	22.0152	22369	6.29296	49.788	6.34464	148.841	0.28154	67.1	11.6123	68.2309	2.40708	42.6349	8.3472	23.9589	1
320600	2019	121.149	99.6124	60.2348	154.498	5.12275	24.0293	24303	6.34396	50.7811	6.42189	157.507	0.479871	68.1	11.7237	67.8267	3.20927	42.4778	7.38506	25.42	1
320600	2020	121.261	99.7773	60.7649	154.577	4.85531	26.9093	26141	6.35053	51.8303	6.54693	171.804	0.552252	69.1	11.7962	68.1076	3.08041	42.6083	7.36337	26.9378	1
320600	2021	121.38	100.022	54.8926	147.93	4.12244	23.1836	29134	6.34354	51.8753	6.58663	149.64	0.650409	71.2	11.8957	68.1012	2.80125	43.7299	7.52526	27.2516	1
320600	2022	121.111	100.131	54.932	143.144	3.76819	26.4665	30819	6.35165	52.905	6.78447	162.412	0.820231	71.79	11.9339	68.2479	3.12305	43.7109	7.27759	28.7216	1
320600	2023	123.655	100.09	54.7879	136.895	3.44649	23.6702	32977	6.38034	53.0697	7.01184	170.827	0.934187	72.6	11.9772	66.8425	2.86005	44.1822	7.21889	29.3151	1
320700	2008	92.865	99.435	44.0148	148.492	4.82926	16.6823	5454	6.77259	44.1032	3.43241	32.6144	0.0646717	42	9.63972	82.9144	1.9403	47.3697	10.0442	12.9861	1
320700	2009	94.9173	99.6381	45.9891	151.952	5.07383	17.3988	6111	6.95943	44.7658	3.56839	37.3416	0.078689	43.45	9.86171	82.7994	1.79994	46.8569	15.6653	13.7408	1
320700	2010	96.883	99.8813	47.8603	155.071	5.30227	16.8572	7038.7	6.99553	45.1556	3.60864	46.7336	0.0831857	51.75	10.0848	81.9609	2.168	49.9909	13.7707	14.3131	1
320700	2011	98.4295	100.004	49.6749	158.56	5.53912	20.0181	8434	7.09359	46.2588	3.75207	52.4989	0.104265	53.15	10.2371	81.1092	2.33617	47.9935	12.9884	15.8341	1
320700	2012	102.055	99.69	51.6515	159.139	5.66886	17.6733	9589.46	7.26157	46.3516	3.96798	58.7768	0.147508	54.35	10.3539	80.0586	2.2068	47.4957	13.8058	16.2622	1
320700	2013	103.95	99.3229	50.4022	164.166	5.80831	19.3019	10465	7.11338	46.4728	4.14146	65.2396	0.185774	55.72	10.4435	79.3041	2.21106	47.9884	13.7535	16.8575	1
320700	2014	105.157	99.3483	52.5711	165.686	5.94782	19.4878	11698	7.16054	46.9918	4.26658	68.1914	0.203948	57.13	10.5278	79.4044	2.36729	47.3423	15.0419	17.7311	1
320700	2015	106.022	99.4572	54.2818	168.778	5.90198	23.5666	12778	7.20524	48.0985	4.40566	74.1129	0.155356	58.7	10.6146	79.3126	2.5368	47.5026	13.7655	19.2229	1
320700	2016	106.283	99.4685	56.5099	171.089	5.96486	21.2431	13932	7.19399	48.1352	4.53865	78.281	0.161518	60.2	10.7033	79.3686	2.72453	46.751	12.3499	19.543	1
320700	2017	106.305	99.4454	58.2952	173.531	5.97045	23.7228	15273	7.22821	48.989	4.64558	84.9268	0.181717	61.7	10.8105	79.7575	2.86585	46.7412	10.9817	20.8459	1
320700	2018	105.878	99.672	59.3897	176.111	6.03395	20.4084	16607	7.19754	48.9272	4.74928	92.2824	0.194923	62.6	10.8572	81.0594	2.47813	47.852	10.6085	20.9604	1
320700	2019	106.804	99.5465	60.2348	175.25	5.81084	23.4597	18061	7.24584	49.8439	4.84489	89.5806	0.393753	63.6	10.9816	80.7422	2.81246	44.4409	10.656	22.3698	1
320700	2020	108.372	99.5673	60.7649	172.961	5.43276	24.8678	19237	7.20709	50.3953	4.96997	96.784	0.480535	61.52	11.0256	80.7788	2.91293	43.8664	10.4307	23.2773	1
320700	2021	108.406	99.9623	54.8926	165.633	4.61579	27.254	21373.1	7.20693	51.2497	5.03927	101.901	0.638369	62.38	11.1554	80.8471	3.02044	44.5371	10.2943	24.3256	1
320700	2022	107.76	100.231	54.932	160.88	4.23507	26.1891	22667.5	7.18119	51.5232	5.09815	146.056	0.79089	63.08	11.2309	81.2587	2.89112	43.3691	9.29308	24.7593	1
320700	2023	107.722	100.203	54.7879	157.143	3.95627	27.826	24411	7.18432	52.2361	5.1835	150.514	0.927173	64	11.3148	81.2126	3.08384	42.9532	9.1874	25.9295	1
320800	2008	94.6238	99.7279	19.2804	104.703	3.23304	17.4553	5949.4	6.69778	43.293	4.31831	46.3453	0.00453173	41.4	9.74434	83.2076	2.16859	57.7462	12.1445	11.3467	1
320800	2009	96.4263	99.6939	28.6189	107.599	3.27663	18.5097	6591.2	6.83743	44.2212	4.6317	52.1804	0.0576114	43.1	9.95229	83.2449	2.04436	58.7141	13.2596	12.7316	1
320800	2010	97.4637	99.6077	38.0475	111.379	3.34817	17.4065	7233	6.89637	44.7018	4.901	56.5802	0.0712289	50.81	10.1568	82.9141	2.05603	60.5259	13.2864	13.6632	1
320800	2011	98.698	99.5361	47.5842	114.97	3.41462	17.4308	8645	6.97655	45.5968	5.33987	67.8837	0.101745	52.04	10.3453	82.7144	1.88922	62.3865	13.0477	15.216	1
320800	2012	100.16	99.4568	50.005	116.141	3.54959	19.4647	9838	6.97768	46.3181	5.81473	74.655	0.119427	53.5	10.4668	82.4248	2.43713	63.4132	14.8355	16.4199	1
320800	2013	101.735	99.2227	52.5746	126.385	3.56079	21.0241	10762.2	7.01011	46.8738	6.59854	80.1708	0.154705	55.06	10.5709	82.2824	2.35825	63.3295	13.7255	17.4243	1
320800	2014	102.182	99.2118	52.6536	129.223	3.54955	20.401	12010.4	7.09455	47.1938	7.2946	83.5869	0.130338	56.46	10.6879	82.6829	2.53186	63.6474	14.2986	17.9839	1
320800	2015	103.082	99.032	54.3212	133.065	3.6849	23.2032	13127.9	7.09802	47.9357	8.03496	88.5723	0.144671	58.15	10.7921	82.7267	2.73575	63.5525	13.5188	19.2223	1
320800	2016	104.328	98.9908	55.1263	130.497	3.71188	20.8987	14318.6	6.94783	47.7576	8.14815	94.4456	0.173603	59.68	10.8905	82.7916	2.48885	61.9243	13.7858	19.3972	1
320800	2017	105.314	98.6731	56.2098	129.53	3.79079	20.8841	15601	7.08017	48.1535	8.34591	103.153	0.18294	61.25	10.991	83.1681	2.34861	62.3267	10.9637	20.1949	1
320800	2018	107.681	99.04	57.3975	123.898	3.56432	23.5099	17058	7.08102	49.1869	8.50279	118.677	0.199579	62.44	11.0697	84.7005	2.84105	62.4377	10.3026	21.5692	1
320800	2019	109.024	98.6184	58.6904	121.133	3.39038	25.997	18567	7.21097	50.014	8.7058	115.757	0.422579	63.5	11.1437	84.5079	2.66419	60.9168	10.481	22.9733	1
320800	2020	110.867	99.185	56.3331	118.843	2.98229	23.7761	19730	7.18413	50.0948	8.90119	126.175	0.647271	65.67	11.1872	84.2896	2.8082	60.7454	12.7338	22.9749	1
320800	2021	111.353	100.169	59.1822	115.836	2.58868	25.1798	21884	7.20283	51.4705	8.91495	135.019	0.791552	66.21	11.3143	83.7965	3.02041	62.2662	9.56258	24.5971	1
320800	2022	110.935	100.526	58.265	113.67	2.32256	25.6588	23404	7.21555	52.0722	8.93762	143.205	0.969972	66.83	11.3628	83.7286	3.1791	61.9235	11.7692	25.3814	1
320800	2023	110.74	100.405	57.4248	111.422	2.05559	25.7083	25287	7.2376	52.5173	8.97331	147.163	1.13907	67.7	11.414	83.603	3.08381	63.1003	15.2771	26.2672	1
320900	2008	99.2298	99.8568	43.8204	138.354	4.49927	17.2978	6867	6.76931	44.7919	3.4472	50.2747	0.0331574	44.8	9.89099	64.4166	1.93254	46.6609	13.4421	13.9112	1
320900	2009	99.5116	99.7486	45.7453	144.168	4.81379	18.1375	7650	6.82182	45.2188	3.56429	52.0923	0.0559436	46.3	10.0689	66.006	2.0382	47.1931	14.7149	14.6464	1
320900	2010	101.934	99.7046	47.7005	146.895	5.02267	16.9124	8751	6.86681	45.4441	3.68538	57.1898	0.0751924	51.96	10.2606	67.1692	2.16732	46.9079	13.6557	15.1868	1
320900	2011	103.294	99.6886	49.6749	151.093	5.27827	17.8503	10511	6.91902	46.1932	3.82572	61.6358	0.0973491	54	10.4273	67.0161	2.053	44.134	12.5694	16.454	1
320900	2012	102.77	99.7074	51.6515	158.032	5.62943	19.882	11898	6.96791	47.0105	4.09201	69.8776	0.132128	55.8	10.5437	68.188	2.53912	43.2211	14.0531	17.7094	1
320900	2013	103.155	99.5684	50.4022	165.43	5.85304	20.8331	12913	7.06054	47.3954	4.34741	77.5012	0.174567	57.21	10.6499	68.7142	2.31984	43.4049	13.678	18.3401	1
320900	2014	104.749	99.1399	52.5711	166.332	5.97102	21.2584	14414	7.1832	47.9157	4.6705	83.103	0.185471	58.54	10.7428	68.7088	2.23183	43.5335	14.0268	19.4224	1
320900	2015	105.915	99.1345	54.2818	168.949	5.90794	19.7415	15748	7.21752	48.1536	4.95101	88.3477	0.192105	60.1	10.8371	68.7034	2.36438	43.8104	13.7891	19.979	1
320900	2016	103.411	99.1485	56.5099	175.84	6.13052	21.0583	17172	7.00215	48.5945	5.08061	92.5319	0.188226	61.56	10.9163	71.0109	2.4265	43.53	13.3199	20.9807	1
320900	2017	104.067	99.0972	58.2952	177.265	6.09889	21.7111	18711	7.16433	49.3415	5.20239	97.9291	0.187586	62.9	11.0273	69.4434	2.58193	43.8292	11.4334	22.1068	1
320900	2018	103.562	99.5606	59.3897	180.049	6.16889	24.3489	20357	7.16381	50.4268	5.33659	95.0972	0.204489	64.03	11.1051	71.9845	2.80459	40.3351	12.6267	23.5235	1
320900	2019	104.414	99.5731	60.2348	179.261	5.94381	24.3993	22258	7.24729	51.0831	5.53735	98.3426	0.108912	64.9	11.1484	71.6812	2.87453	43.5068	13.2217	24.6075	1
320900	2020	105.836	99.9633	60.7649	177.105	5.56294	27.4848	23670	7.2063	52.111	5.64406	108.88	0.481202	54.11	11.2019	71.3474	2.85687	44.5579	12.0142	25.9572	1
320900	2021	105.443	100.459	54.8926	170.288	4.7455	22.8496	26048.6	7.20726	51.9654	5.73871	116.404	0.589553	64.75	11.3181	71.3238	3.08452	47.3335	11.5425	25.7938	1
320900	2022	105.488	100.504	54.932	164.344	4.32627	21.1813	27794	7.2095	52.2049	5.91297	133.085	0.774938	65.43	11.3945	71.0157	2.81146	49.1021	11.8341	26.3575	1
320900	2023	105.625	100.322	54.7879	160.263	4.03483	23.3292	29744	7.23044	53.0083	5.99041	141.488	0.85943	66.27	11.4472	70.7863	3.14926	50.1719	16.7474	27.7347	1
321000	2008	90.3282	99.5538	50.0311	153.536	5.00072	17.2281	7450	6.81495	45.0733	3.78251	48.0433	0.0324418	51.3	10.4405	81.5534	2.13786	42.7757	6.22767	14.5635	1
321000	2009	92.6894	99.5816	49.8926	155.702	5.20254	17.7851	8295	6.97065	45.556	4.03362	55.2343	0.0569789	52.9	10.6081	81.7762	2.08443	44.7349	6.79056	15.1937	1
321000	2010	94.0738	99.4812	50.181	159.607	5.45847	18.3974	9173	6.99656	45.8782	4.18915	69.9395	0.0795281	56.75	10.7906	82.0447	2.1499	47.9131	6.51248	15.805	1
321000	2011	95.2322	99.4591	60.6603	163.883	5.72509	16.8191	10870	7.37067	46.9609	4.35585	80.3764	0.141349	57.9	10.9538	82.3612	2.25033	47.5523	7.7295	17.4126	1
321000	2012	96.7041	99.2387	54.5571	167.946	5.98256	21.3138	12294	7.35929	47.638	4.49408	85.373	0.195623	58.81	11.0664	82.5694	2.53179	46.3303	7.69198	18.486	1
321000	2013	98.3029	98.9222	48.5114	173.596	6.14195	19.8309	13775	7.43673	47.4509	4.75477	92.1628	0.251927	59.98	11.1666	82.2702	2.39415	46.6492	7.19232	18.5023	1
321000	2014	99.571	98.8541	50.3924	174.982	6.28151	21.4398	15283.8	7.43675	48.164	4.92263	98.341	0.256835	61.2	11.2918	82.6649	2.5952	46.7174	10.6056	19.7358	1
321000	2015	100.294	98.9274	52.2717	178.418	6.23907	20.2538	16619.4	7.46478	48.4848	5.08998	102.635	0.268465	62.79	11.3749	82.729	2.5782	46.3708	9.60522	20.3614	1
321000	2016	100.917	99	54.1462	180.185	6.282	20.2839	18057	7.16959	48.68	5.25653	107.559	0.282618	64.4	11.4753	82.5873	2.50994	46.2768	10.4787	21.1142	1
321000	2017	97.1349	98.8667	55.0891	189.914	6.53412	20.5599	19694	7.28435	49.2253	5.43323	116.017	0.296827	66.05	11.6092	81.1881	2.57518	46.2799	9.6663	22.0489	1
321000	2018	96.3943	99.4989	55.9681	193.438	6.62761	20.5331	21457	7.25498	49.9494	5.57763	129.18	0.327956	67.13	11.6876	83.1179	2.81957	47.3445	8.96428	22.9891	1
321000	2019	95.5469	99.7352	56.126	195.897	6.49544	22.5883	23333	7.3951	51.0178	5.70978	125.353	0.621815	68.2	11.7599	81.9783	2.72065	44.8085	8.68208	24.3875	1
321000	2020	96.9116	100.002	56.1341	193.415	6.07523	27.3799	24813	7.38873	52.293	5.82699	132.572	0.679399	71.03	11.7986	81.1883	3.18088	45.244	8.42885	26.0632	1
321000	2021	97.0241	100.426	55.9055	185.064	5.15728	25.3799	27354	7.38294	52.849	5.9576	129.223	0.751526	71.42	11.9059	80.9067	2.97113	46.0938	8.53935	26.9481	1
321000	2022	96.9508	100.484	55.6455	178.817	4.70725	26.9809	29332	7.37564	53.6452	6.05036	138.812	0.855773	72.01	11.9741	80.8392	3.03134	46.9264	8.55729	28.2163	1
321000	2023	98.0662	100.168	55.5614	172.615	4.34581	25.9126	31488	7.39424	53.9516	6.15105	145.896	1.04142	72.79	12.0153	80.0311	3.03349	47.3307	9.4286	29.1044	1
321100	2008	76.127	99.6471	44.1178	90.1871	5.85011	15.1582	8710.5	6.39004	44.2712	4.30443	51.9255	0.061196	59.75	10.8665	73.6201	1.86159	57.9466	7.60723	13.8777	1
321100	2009	76.436	99.2957	45.8033	99.7927	5.75446	18.3803	9642	6.6888	45.2745	4.47259	72.476	0.0466155	59.95	11.0342	73.9643	2.12633	51.7832	9.5061	15.2282	1
321100	2010	77.3458	98.8361	47.7314	108.362	5.98875	16.5532	10874	6.74413	45.2633	4.63432	89.3818	0.0698865	61.99	11.204	74.3999	1.97608	53.1621	8.36129	15.6856	1
321100	2011	78.3671	98.8832	49.6749	111.701	6.68957	20.4484	12825	6.96355	46.7055	4.39582	120.297	0.0977578	63.02	11.3505	73.3213	2.45559	52.2199	8.99059	17.6799	1
321100	2012	79.6233	98.8923	51.6515	113.196	6.97044	19.1786	14518	7.09703	47.1846	4.57651	153.957	0.125574	64.19	11.4816	73.815	1.98896	53.7481	9.46168	18.533	1
321100	2013	80.3109	98.4908	50.4022	114.929	7.02925	21.3336	15876	7.11885	47.6757	5.09825	178.989	0.171279	65.39	11.5871	74.1533	2.40659	54.6956	9.15823	19.5277	1
321100	2014	80.9618	98.172	52.5711	121.588	7.40364	19.6179	17617	7.16756	47.8716	5.23335	208.116	0.175361	66.63	11.6913	74.5537	2.57758	55.6307	8.92961	20.277	1
321100	2015	82.7442	97.9165	54.2818	122.669	7.38559	23.5034	19213.6	7.14449	48.8655	4.95729	229.752	0.183054	67.93	11.767	74.2246	2.82004	55.794	9.24291	21.964	1
321100	2016	83.54	98.1031	56.5099	124.471	7.46952	24.0783	20922	6.82335	49.2542	5.20789	239.233	0.189739	69.18	11.8562	74.4471	2.8437	55.7218	9.41448	22.9784	1
321100	2017	80.5611	98.7291	58.2952	122.475	7.53089	21.3538	22724	6.90783	49.7136	5.34986	260.453	0.181973	70.5	11.9049	74.1541	2.69386	56.2936	8.55354	23.5177	1
321100	2018	73.2908	99.2463	59.3897	122.568	8.30099	23.8476	24687	6.99935	50.904	5.45286	262.829	0.216218	71.24	11.9147	76.2914	2.89097	55.611	9.11351	24.9956	1
321100	2019	67.443	99.4229	60.2348	129.295	8.80657	23.6078	26785	7.17789	51.6566	5.61071	269.671	0.390556	72.18	11.9372	72.3183	2.6044	54.6291	8.50171	26.0587	1
321100	2020	66.558	99.7478	60.7649	129.615	6.50384	25.7547	28402	7.22327	52.7259	5.62306	297.622	0.438915	79.45	11.9632	73.1337	2.73175	56.3953	6.94163	27.3346	1
321100	2021	67.7026	100.27	54.8926	93.8065	4.8651	28.2124	31354.3	7.13797	53.821	5.57489	325.124	0.473456	79.88	12.088	72.879	3.04394	57.5514	6.74952	28.7876	1
321100	2022	67.3257	100.625	54.932	92.6735	4.10937	24.6549	33129	7.09654	53.866	5.39808	340.414	0.490162	80.24	12.1437	73.4705	3.07587	57.3618	6.2992	28.9895	1
321100	2023	68.2935	100.318	54.7879	90.7263	3.88933	28.8045	35466	7.14327	55.0618	5.31414	357.236	0.536065	80.7	12.1937	72.897	3.10782	57.8556	7.69405	30.9618	1
321200	2008	110.208	99.29	58.1449	107.742	2.69615	16.3799	7142	7.17727	45.7653	4.35284	48.0804	0.0519742	49.1	10.2342	75.74	1.94196	49.0213	11.5195	15.4177	1
321200	2009	113.042	99.17	56.5782	103.352	3.05589	19.0843	7865	7.23208	46.3144	4.44031	57.8669	0.103351	51	10.4029	76.2551	2.04263	52.441	12.2419	16.2322	1
321200	2010	116.474	98.6831	58.5662	103.252	3.19422	18.9608	9073	7.25795	46.5481	4.44357	66.8672	0.138799	55.65	10.6114	75.7347	1.95962	54.1139	11.9872	17.0332	1
321200	2011	119.544	98.2928	60.7847	102.338	3.1784	19.8032	10752	7.3719	47.2058	4.7265	80.3256	0.169178	56.81	10.7742	75.5242	2.32867	52.4161	11.6861	18.3096	1
321200	2012	122.298	98.342	60.26	106.74	3.21947	19.81	12160	7.37652	47.5909	5.21444	92.2836	0.19217	57.92	10.8846	75.6068	2.46265	53.1233	13.114	19.0217	1
321200	2013	124.651	98.4151	59.656	109.251	3.33665	20.3045	13609	7.4496	48.1358	5.44239	103.607	0.242701	59.04	10.9889	75.3057	2.15445	54.4763	13.5622	19.8662	1
321200	2014	126.583	98.4163	60.1429	111.876	3.38328	20.0921	15076	7.4894	48.5627	5.66021	113.643	0.294544	60.15	11.1018	75.3737	2.37951	55.5506	13.824	20.651	1
321200	2015	128.326	98.4809	61.1442	110.27	3.36299	21.4967	16410	7.52886	49.2628	5.92546	122.574	0.342067	61.55	11.193	75.2887	2.58292	55.1799	13.0072	21.7163	1
321200	2016	128.479	98.8751	61.4882	115.197	3.36416	20.9603	17861	7.19526	49.3904	6.15436	137.486	0.0378615	63.2	11.299	75.6372	2.68478	55.0173	12.6389	22.2255	1
321200	2017	128.081	98.7379	62.3633	120.134	3.35418	23.0696	19494	7.36362	50.3088	6.32046	154.86	0.369316	64.93	11.4505	73.5622	2.77124	55.027	10.0759	23.5821	1
321200	2018	121.141	99.017	63.2139	131.493	3.56267	20.2099	21219	7.43828	50.4911	6.48911	171.15	0.38669	66	11.5282	72.7981	2.51646	55.723	9.95943	23.8989	1
321200	2019	119.996	98.7168	63.7005	134.996	3.60869	24.582	23116	7.49793	51.6269	6.64042	174.467	0.703841	66.8	11.5372	72.1604	2.86955	55.2754	9.01824	25.7156	1
321200	2020	120.565	99.5475	64.1841	132.584	3.51158	22.196	24615	7.49273	52.0182	6.81863	186.929	0.828821	68.1	11.5797	72.266	2.75517	55.4816	8.84246	26.0837	1
321200	2021	120.175	100.315	64.0136	102.206	1.70871	25.8379	27401	7.47997	53.7068	6.80149	198.545	1.00591	68.64	11.7135	72.4504	3.06261	56.2781	8.58961	28.1626	1
321200	2022	119.717	100.675	61.4225	96.0429	1.60952	26.6499	29417	7.46187	54.3719	6.80672	212.549	0.987495	69.24	11.7844	72.4977	3.05589	56.3686	8.36956	29.1049	1
321200	2023	120.498	100.294	59.0866	84.5184	1.50107	26.3802	31810	7.49391	54.7315	6.9176	220.474	1.16355	70.08	11.8424	71.9598	3.12689	56.5301	8.63325	30.076	1
321300	2008	98.4298	99.4711	44.663	142.174	4.63575	15.6562	5406	6.20561	43.4273	7.02817	39.5132	0.0420023	35.85	9.41359	82.3814	1.88338	56.4798	15.291	12.65	1
321300	2009	100.175	99.6119	46.2248	144.722	4.83806	19.7809	6057	6.37774	44.5629	7.49761	45.1847	0.051353	37.7	9.63529	80.5334	2.05103	58.8747	17.3074	13.9991	1
321300	2010	101.48	99.4229	47.8889	148.137	5.06698	16.1031	6975	6.40552	44.2537	7.86396	49.111	0.066874	48.33	9.87708	81.0671	2.16864	59.0667	15.645	13.9287	1
321300	2011	102.689	99.2144	49.6749	151.983	5.30936	19.7126	8344	6.47209	45.2456	8.35724	54.9457	0.0982647	49.78	10.0772	80.5702	2.26346	58.8699	16.629	15.4894	1
321300	2012	103.886	98.897	51.6515	156.335	5.56898	22.0241	9495	6.79799	46.2109	7.03491	60.8559	0.195401	50.97	10.2097	80.874	2.55129	60.0386	17.5	16.8297	1
321300	2013	105.058	98.7021	50.4022	162.433	5.74702	19.0744	10418	6.5651	45.6012	7.43295	64.2348	0.257108	52.36	10.3031	81.1434	2.09902	58.7216	20.2468	16.5348	1
321300	2014	106.812	98.9207	52.5711	163.119	5.85565	20.6188	11677	6.74682	46.5674	8.02214	67.9561	0.281446	53.74	10.4117	81.2563	2.42182	58.93	20.4491	17.7564	1
321300	2015	108.039	99.1651	54.2818	165.627	5.79179	19.915	12771.5	6.69721	46.8869	8.60206	71.8395	0.277458	55.53	10.4986	81.0815	2.2168	58.9369	21.5289	18.3157	1
321300	2016	109.814	99.2173	56.5099	165.587	5.77305	22.1663	13929	6.63675	47.6232	8.83632	75.987	0.251644	57.53	10.5895	80.6944	2.3243	57.7121	19.7729	19.5073	1
321300	2017	110.416	99.1047	58.2952	167.072	5.7482	23.3544	15268	6.68497	48.2561	9.17486	81.3808	0.245646	58.53	10.696	80.4416	2.38018	58.8905	15.4815	20.5786	1
321300	2018	115.759	98.8476	59.3897	161.079	5.51892	23.2744	16639	6.69751	48.6082	9.44801	89.9272	0.262014	60	10.7481	80.752	2.95458	59.8262	16.3007	21.4284	1
321300	2019	117.047	98.5684	60.2348	159.913	5.30229	22.7835	18121	6.83267	49.0044	9.89951	86.8323	0.460935	61.1	10.8657	80.8363	2.62809	57.095	17.1116	22.2239	1
321300	2020	119.132	99.2217	60.7649	157.339	4.94207	23.1563	19466	6.78745	49.6971	10.317	93.9701	0.558603	62.24	10.9178	80.8324	3.03832	57.1405	16.4156	23.0431	1
321300	2021	119.504	99.9011	54.8926	150.251	4.18714	24.4782	21576.7	6.79118	50.4995	10.2289	142.793	0.707358	63.24	11.0497	80.6458	2.90685	59.161	12.8422	23.8927	1
321300	2022	119.426	100.242	54.932	145.164	3.82137	27.4175	23058	6.80066	51.5217	10.3331	157.793	0.813198	64.07	11.1553	80.5838	3.394	60.031	12.2224	25.206	1
321300	2023	119.749	100.19	54.7879	141.36	3.55892	24.992	24679	6.82674	51.579	10.3406	166.087	0.982817	65	11.226	80.3712	2.96786	60.0861	11.6197	25.5621	1
330100	2008	184.6	98.349	74.2716	75.1922	5.7801	17.5052	10692	5.72498	46.0847	14.0923	109.642	0.0812789	69.34	11.1642	47.6771	1.95016	51.4356	4.98172	19.2798	2
330100	2009	184.399	98.3033	75.6699	82.7716	6.31717	17.606	11822	5.67437	46.3652	15.0535	117.228	0.175367	69.5	11.2178	47.6874	2.05045	51.6808	5.18942	19.9503	2
330100	2010	181.294	97.996	77.3882	86.6553	7.00397	17.7102	13186	3.32093	44.1754	15.2887	137.136	0.193198	73.3	11.3659	45.7403	2.31266	53.7017	5.18432	19.6264	2
330100	2011	180.792	98.0691	87.5492	94.1503	7.61901	19.9041	15245	5.82827	48.1795	16.3266	161.656	0.245417	73.9	11.5218	44.9414	2.4471	53.4321	5.24875	23.0796	2
330100	2012	185.704	96.4947	83.8357	95.207	8.14833	19.9776	17017	3.32326	45.2001	17.2297	178.587	0.445745	74.3	11.6207	44.699	2.10484	54.0459	5.70743	22.5355	2
330100	2013	192.454	95.335	80.7067	89.0549	8.25669	17.1409	21208	2.89959	44.8136	18.337	194.587	0.650812	74.9	11.6791	44.8261	2.20254	54.1127	5.91589	23.7192	2
330100	2014	163.225	95.1046	86.0563	108.194	10.0048	20.9921	23555	4.43129	47.533	18.9362	222.059	0.75935	75.1	11.7646	36.3643	2.41691	55.7552	5.84996	26.2811	2
330100	2015	173.693	94.8431	90.4029	103.823	9.82932	20.7961	25719	5.43121	49.2959	17.4732	242.408	1.03718	75.3	11.8415	28.3953	2.53314	57.3125	7.30365	28.3237	2
330100	2016	182.905	95.8887	95.2648	104.455	9.62116	20.8146	27908	5.40308	50.584	17.264	259.082	1.09759	76.2	11.9429	28.2677	2.60493	58.384	6.51119	29.9939	2
330100	2017	169.915	97.847	97.6718	113.355	10.4723	22.482	30397	5.46485	52.3738	15.9057	277.016	1.47043	76.8	12.0267	31.651	2.43969	59.8383	5.81604	31.616	2
330100	2018	173.363	99.7724	97.8635	109.011	10.17	21.7514	33193	5.60452	53.9882	14.7197	302.61	1.75052	77.4	12.0699	31.8185	2.80232	60.6544	5.48801	33.0694	2
330100	2019	176.218	99.8301	98.0363	105.319	9.63085	23.8144	36255	5.5945	55.1815	13.418	329.264	1.81519	78.5	12.1724	31.4378	3.09009	58.9325	5.3966	35.0509	2
330100	2020	153.632	100.852	97.2579	110.566	9.81257	23.9716	38700	5.59886	56.0867	12.1266	343.848	1.96224	83.3	12.1941	36.6054	2.80169	59.1331	4.975	35.8882	2
330100	2021	151	100.968	96.2702	64.5481	7.99683	21.752	42692	5.79996	57.0732	11.6805	370.176	2.31819	83.6	12.2871	37.1056	2.52152	62.6662	4.12981	37.4379	2
330100	2022	148.036	102.685	72.3999	60.1791	7.57057	27.7555	45183	5.69755	58.1233	11.2705	387.58	2.30599	84	12.3077	37.5282	2.91428	62.2472	3.8139	37.8036	2
330100	2023	147.412	102.185	71.1028	59.5552	7.46631	22.2085	48180	5.91786	57.9978	11.4297	416.081	2.46481	84.2	12.3632	36.9683	2.57444	62.9483	4.55741	38.2246	2
330200	2008	137.572	99.8072	82.6396	1166.44	10.302	14.5788	11450	5.76776	46.1117	13.5619	98.8912	0.0521729	63.59	11.1531	43.777	1.82824	45.3394	6.95253	19.0519	2
330200	2009	134.704	99.5477	83.6735	1213.63	11.8176	17.9014	12641	5.90609	46.9349	14.3638	110.883	0.149088	63.7	11.2361	43.5413	1.93223	46.762	7.02065	20.3696	2
330200	2010	132.061	98.6564	85.255	1347.23	13.5091	19.4589	14261	6.76738	48.0865	14.7064	141.921	0.206226	68.3	11.4068	43.966	2.32247	49.0958	7.15945	21.9382	2
330200	2011	130.936	98.3139	95.7811	1444.79	14.7942	18.8311	16518	6.24056	48.3061	15.388	158.004	0.28132	69	11.5629	44.0673	2.04312	47.8898	7.71789	23.5377	2
330200	2012	128.486	98.1049	89.5144	1502.28	18.2205	18.9233	18475	6.02951	48.0366	16.0831	165.001	0.609698	69.4	11.6434	42.9112	2.32294	47.5924	8.71518	23.8683	2
330200	2013	127.284	97.8623	83.1756	1531.46	17.9122	22.2334	21879	5.46181	48.4455	15.4655	163.585	0.623017	69.8	11.7189	41.7777	2.24624	46.8163	8.55203	25.3814	2
330200	2014	132.981	96.7395	86.7099	1493.7	16.1628	22.1935	24283	5.57294	49.0144	14.7457	171.248	0.781362	70.3	11.778	42.4905	2.41472	48.0149	8.18899	26.9859	2
330200	2015	134.293	95.6103	90.7582	1577.37	18.4206	19.6595	26469	7.12676	50.4294	15.6624	180.222	0.769921	71.1	11.8237	42.6648	2.1468	47.629	8.74955	28.6516	2
330200	2016	136.816	96.1851	95.6682	1577.11	18.276	21.7472	28572	5.79587	50.4149	16.2111	195.183	0.967799	71.9	11.898	41.651	2.79475	47.3484	8.08758	29.9363	2
330200	2017	144.03	97.4971	98.8017	1504.61	16.9458	20.1742	30871	5.80463	51.6034	14.8227	214.689	1.07587	72.4	12.0128	41.9688	2.50352	48.8321	6.50218	31.2101	2
330200	2018	144.285	98.6361	99.023	1488.72	17.2698	20.7823	33633	6.08684	53.1962	14.2727	239.879	0.875079	72.9	12.0907	42.3424	2.74572	48.3612	5.76375	32.8931	2
330200	2019	146.033	99.1622	98.6545	1413.49	17.4347	21.8676	36632	6.03713	54.3251	13.9202	258.905	1.36127	73.6	12.1916	42.3701	2.82822	47.3642	5.30859	34.589	2
330200	2020	133.79	100.109	98.7435	1505.95	17.4536	25.3315	39132	6.05984	55.8473	13.8093	272.91	1.73646	78	12.2182	46.7939	3.12247	46.0081	5.05026	36.3321	2
330200	2021	132.466	101.148	97.6228	1566.45	15.8745	24.5259	42946	6.00869	57.095	12.8679	294.183	1.97726	78.4	12.3723	47.3675	3.17607	47.0662	4.91664	37.9779	2
330200	2022	130.794	101.959	77.0101	1500.16	14.2255	26.2954	45487	6.22825	57.6888	12.8776	312.793	2.27043	78.9	12.4407	47.9439	2.77957	46.7227	4.9794	37.9846	2
330200	2023	129.706	101.402	75.9615	1479.84	12.612	25.0407	48350	6.52095	58.3373	12.8109	329.877	2.58913	79.9	12.4824	47.719	3.24273	71.3909	5.3953	39.1975	2
330300	2008	177.231	98.5222	93.0323	1419.48	5.58877	15.3618	9469	4.25518	44.5034	15.6199	57.4793	0.131239	60.52	10.3547	64.3793	1.91667	40.9142	8.5786	18.9909	2
330300	2009	189.125	97.9305	93.8975	1328.8	5.83215	17.1813	10100	4.42379	45.014	16.2633	60.9489	0.0990689	60.7	10.3871	63.8945	1.98435	42.031	8.57933	19.986	2
330300	2010	195.655	96.7719	95.6098	1355.91	6.30918	19.4138	11416	4.0833	44.9666	17.147	69.0807	0.0795476	66	10.5234	63.6271	2.14022	41.9146	9.36936	21.1254	2
330300	2011	197.227	96.4856	111.198	1398.43	6.98411	17.1835	13243	4.39411	46.0268	18.2178	80.3603	0.0989024	66.3	10.6647	63.5054	2.21437	41.4328	10.6719	23.0648	2
330300	2012	200.482	97.512	103.008	1418.31	7.54767	17.7909	14719	4.12429	46.2481	18.9171	88.0461	0.275391	66.7	10.7332	63.3803	2.29071	42.9941	10.877	23.1995	2
330300	2013	200.242	99.5407	92.4055	1421.07	7.93557	19.4663	17549	3.53022	46.9435	18.1559	89.0907	0.392821	67	10.8118	63.3584	2.11579	43.0516	12.3503	23.8313	2
330300	2014	180.445	98.8236	93.8767	1601.7	9.05001	17.357	19394	5.23194	48.4311	18.0783	99.9751	0.467857	67.2	10.8758	56.6694	2.41649	45.0695	10.6124	24.9195	2
330300	2015	183.129	97.2102	96.8933	1615.06	9.32287	21.3411	21235	5.86649	49.6804	18.2255	111.077	0.561046	68	10.9495	49.8425	2.44815	45.6518	12.2493	27.1412	2
330300	2016	174.63	97.4713	100.26	1719.38	10.0771	23.3419	22985	5.81263	50.556	18.4563	115.271	0.410895	69	11.0408	52.3031	2.72527	46.1046	10.217	28.5099	2
330300	2017	183.987	98.61	101.974	1606.28	9.67132	22.1078	25154	5.94732	51.7361	16.6198	123.562	0.516003	69.7	11.0913	51.5378	2.68506	46.6274	9.57376	29.7559	2
330300	2018	185.359	100.731	101.54	1548.87	9.51181	22.0314	27478	6.06518	53.3513	16.3615	128.508	0.591133	70	11.1907	50.6336	2.48564	46.6106	8.02172	31.0058	2
330300	2019	187.926	100.887	100.1	1464.07	9.03086	22.191	30211	5.89585	53.9697	16.3472	143.427	0.664728	70.5	11.2822	49.9237	2.60837	46.0801	6.41726	32.2531	2
330300	2020	185.117	101.118	99.1995	1394.44	8.14359	21.8058	32428	6.04161	54.7356	15.5797	151.987	0.90643	72.16	11.321	50.4177	2.44065	44.5649	8.15757	33.2432	2
330300	2021	186.616	99.9936	101.053	1179.95	6.47062	26.179	35844	6.13889	56.1797	15.6219	161.329	1.22386	72.8	11.4192	51.3374	3.06895	45.3979	7.71877	35.9741	2
330300	2022	187.477	101.227	123.822	1121.79	5.97789	26.1304	38482	6.09185	58.4757	15.7177	172.057	1.50634	73.65	11.4774	51.2699	2.99355	44.8836	7.41472	39.1873	2
330300	2023	188.67	101.442	122.112	1088.97	5.8336	26.7284	41622	6.14744	59.4807	15.7964	180.526	1.9046	74.7	11.5583	50.4169	3.13336	43.8025	8.20084	40.7824	2
330400	2008	88.8328	98.6858	55.4528	53.1834	11.8401	14.6899	11538	7.19656	45.7522	4.4011	69.6243	0.0827415	50.02	10.8911	56.208	1.74793	44.8566	7.61412	16.6993	2
330400	2009	87.8259	98.4885	56.5289	55.2454	13.1125	17.4243	12685	7.06686	46.2523	4.54755	71.5711	0.0930705	51.2	10.9416	57.6827	1.94178	46.454	7.67448	17.7948	2
330400	2010	86.6431	98.1231	57.7147	57.7301	14.5301	19.5866	14365	7.03747	46.8348	4.58808	85.094	0.0946185	53.3	11.1175	56.9614	2.26087	47.6767	7.70755	19.0969	2
330400	2011	85.5785	97.5869	64.5268	60.5152	16.0958	18.9111	16707	7.14346	47.4824	4.64263	90.3316	0.127899	54.4	11.2648	57.3092	2.24657	45.0952	7.83834	20.7172	2
330400	2012	86.6467	96.8066	61.0835	63.2177	17.4637	17.3835	18636	6.84284	46.8847	4.70051	99.0409	0.213251	55.3	11.3375	58.3174	2.06539	48.2432	8.82144	20.9631	2
330400	2013	87.6047	96.2192	57.693	66.3876	18.1387	19.1934	22396	6.63684	47.505	4.86508	99.4884	0.216137	57.1	11.4186	58.258	2.23322	48.7596	10.9355	22.8092	2
330400	2014	86.0473	96.2087	60.5873	70.4286	18.9783	21.8656	24676	6.37023	48.3308	4.90907	100.97	0.244275	59.2	11.4753	57.4405	2.40935	51.1146	9.51088	24.5412	2
330400	2015	92.6916	95.4463	63.8153	67.8464	18.419	23.5945	26838	6.24148	48.9419	4.97145	106.595	0.331337	60.9	11.5195	56.7188	2.45906	55.8616	12.7681	26.2465	2
330400	2016	91.9716	95.6925	66.8333	70.5734	19.1337	22.0773	28997	6.2439	49.4837	4.87028	112.985	0.286278	62.9	11.6057	55.8392	2.74295	60.1942	11.2868	27.2829	2
330400	2017	96.9435	96.8698	69.0079	69.7306	18.355	19.393	31436	6.25194	50.3739	4.66369	116.789	0.300256	64.5	11.7203	57.4276	2.36251	63.1563	9.97769	28.2946	2
330400	2018	95.4903	98.8694	67.4023	64.4187	18.4636	21.4345	34279	6.19809	52.1278	4.48134	118.638	0.363767	66	11.8155	59.9102	2.71016	63.0591	8.27159	29.9763	2
330400	2019	95.2883	99.053	64.1309	65.3414	17.8105	22.7401	37413	6.46967	53.386	4.49468	132.396	0.399238	67.4	11.9018	59.4652	2.75089	60.4638	6.96129	31.651	2
330400	2020	97.3898	99.6558	64.3524	63.129	15.4792	23.2632	39800.8	6.47801	54.4854	4.4856	140.851	0.495427	71.34	11.9166	59.4292	2.9889	57.4262	7.53719	33.0203	2
330400	2021	96.7827	100.298	64.1615	99.2704	12.4766	23.4782	43598	6.48002	55.8996	4.28829	150.114	0.588025	71.9	12.0484	59.7711	2.74565	57.2036	7.42089	34.9547	2
330400	2022	96.7063	100.677	53.2667	83.2143	11.5889	24.363	46276	6.36399	56.2933	4.09305	167.079	0.720148	72.35	12.0991	60.7465	2.8744	57.9873	7.35918	35.5195	2
330400	2023	91.7732	100.43	53.5846	89.1114	11.9929	23.971	49643	6.48264	57.1003	4.16045	176.946	0.816204	73.2	12.1379	63.903	2.80327	56.6036	6.88545	37.1205	2
330500	2008	100.845	97.7973	56.6079	138.753	8.13225	16.8243	10751	6.69847	45.2687	6.41716	98.6468	0.054655	50.01	10.5975	58.6296	2.23559	43.8864	8.59322	16.7513	2
330500	2009	101.485	97.4872	58.8253	143.272	8.09485	16.8603	11745	6.77185	45.595	7.09498	103.871	0.0700907	50.7	10.6576	58.3103	2.09233	44.1691	9.20927	17.4745	2
330500	2010	95.1882	97.7087	60.3214	153.798	8.62056	18.5037	13288	6.70283	46.2841	7.31565	130.178	0.0690426	52.9	10.8212	63.4226	2.06396	46.3899	8.91238	18.5475	2
330500	2011	104.208	96.8501	63.3765	148.292	7.93039	18.954	15381	6.73756	46.8208	7.6439	143.731	0.0895849	53.3	10.9719	59.5679	2.21915	45.0334	8.81055	20.0764	2
330500	2012	109.616	94.7628	66.6591	153.054	7.75514	20.2796	17188	6.60643	46.6956	8.21349	156.534	0.194596	55.1	11.0615	60.709	2.62651	44.9082	8.97494	21.4732	2
330500	2013	116.858	93.3088	71.2035	151.459	7.59439	21.384	20257	6.65369	47.3918	8.65632	159.434	0.199382	56	11.1374	61.0078	2.21361	44.6084	11.115	23.6955	2
330500	2014	103.954	94.2965	76.038	175.184	8.8129	19.3777	22404	6.93009	48.4324	9.35934	180.683	0.266275	57.4	11.2138	56.8726	2.15904	45.4289	11.9352	24.7261	2
330500	2015	89.5437	94.1056	80.6	211.369	10.5753	21.3673	24410	6.52125	48.8036	9.92726	191.92	0.308397	59.2	11.2777	52.7426	2.80061	45.4986	15.1025	26.0396	2
330500	2016	89.502	94.9677	85.306	226.882	10.8282	20.368	26508	6.51733	49.7652	10.4595	201.133	0.353706	60.5	11.3645	51.3127	2.34578	44.2194	13.9476	27.3084	2
330500	2017	91.4483	97.124	85.496	227.805	10.5966	21.2697	28999	6.45978	51.4317	9.69334	219.035	0.336595	62	11.4413	52.5476	2.82691	45.7758	11.2861	28.8064	2
330500	2018	85.5271	99.5745	86.427	238.178	11.0404	25.2078	31767	6.59707	53.928	9.71741	234.666	0.44724	63.5	11.5311	59.0335	2.90833	45.7413	10.2303	31.0451	2
330500	2019	86.9159	99.9552	82.7553	230.349	10.5358	21.671	34803	6.60221	54.1882	9.12051	256.065	0.531424	64.5	11.6656	58.1607	2.98948	45.3098	8.83588	31.6282	2
330500	2020	87.3342	100.913	86.0279	210.3	10.0621	25.5694	37244	6.63759	56.0659	9.11577	264.481	0.68013	65.64	11.6887	57.7235	2.7772	44.1718	8.54982	33.9072	2
330500	2021	86.0554	102.019	84.3252	162.606	9.6828	23.7189	41302.7	6.5646	57.1629	8.98906	279.866	0.811895	66	11.8167	58.3146	2.94555	43.2785	8.59934	35.4217	2
330500	2022	82.9095	103.99	50.3295	153.714	9.33848	25.2439	44112	6.53509	57.2798	8.31617	290.393	0.967848	66.36	11.8715	58.7336	3.05548	42.123	8.35595	34.3029	2
330500	2023	82.4147	102.138	49.3935	147.298	8.87669	24.2167	47455	6.597	57.2615	8.17266	304.777	1.20917	67.5	11.9125	58.042	3.00738	42.1576	8.78847	35.6728	2
330600	2008	202.867	98.7526	97.0194	48.598	5.74859	18.733	10950	4.63944	46.6039	13.6802	100.208	0.0791982	57.46	10.8369	55.1436	2.11549	60.9766	8.85534	21.3249	2
330600	2009	210.742	97.9016	103.134	49.488	5.94605	16.4715	12026	4.66777	46.5431	15.0305	107.945	0.100169	57.7	10.9018	56.2305	1.8985	62.1496	9.50691	22.0611	2
330600	2010	218.26	97.3969	106.261	51.4946	6.18575	18.1665	13651	4.45369	46.9894	16.2316	130.923	0.110523	58.6	11.0617	56.0387	1.95264	63.6083	9.32649	23.4643	2
330600	2011	226.589	97.1185	114.218	52.9139	6.46898	17.9807	15861	4.44107	47.8366	16.4485	146.187	0.1951	59.3	11.2349	55.9291	2.27316	62.1757	9.73423	25.3166	2
330600	2012	234.745	96.1251	113.64	55.4284	6.98819	16.3009	17706	4.1887	47.3775	17.1681	157.445	0.279102	60.1	11.3253	56.6998	2.22785	62.9236	10.115	25.8647	2
330600	2013	245.235	95.6013	113.448	55.8725	7.34178	17.5546	21307	4.11363	48.2638	17.4067	165.249	0.382338	61	11.4055	57.0772	2.10559	62.9202	10.6375	28.014	2
330600	2014	207.959	95.8523	120.508	68.2073	9.87314	20.3228	23539	5.33163	50.6524	17.8643	161.581	0.410796	62.1	11.4752	55.1914	2.5312	64.7994	10.7306	30.1838	2
330600	2015	213.847	97.1958	124.136	63.2761	10.578	21.993	25648	6.05012	52.9649	18.5331	171.925	0.436816	63.2	11.5208	46.2017	2.46986	65.31	12.6816	32.3274	2
330600	2016	221.377	99.0326	132.896	57.8173	10.1292	22.6122	27744	6.15901	54.9873	18.7623	171.702	0.496701	64.3	11.5863	43.3089	2.49876	66.1139	12.5915	34.4441	2
330600	2017	189.594	100.023	134.263	67.2295	12.3501	21.7376	30331	6.12723	55.6685	17.106	179.236	0.521977	65.5	11.6428	51.9602	2.80348	67.7092	10.5674	35.1592	2
330600	2018	183.289	100.564	133.661	67.5932	11.3083	26.6167	33097	6.48075	57.7352	16.314	212.772	0.569707	66.6	11.7051	52.1862	2.88972	68.0018	9.37154	37.492	2
330600	2019	184.823	100.916	122.653	68.7572	11.044	21.0207	36120	6.47637	57.2785	15.1261	260.571	0.631516	68.4	11.7679	51.78	2.64484	66.4188	7.13782	37.0714	2
330600	2020	169.159	101.892	120.375	74.9966	11.769	21.6693	38695.6	6.47779	58.2197	13.476	272.532	0.613182	71.02	11.8063	56.0154	2.73362	64.5593	6.97626	38.0573	2
330600	2021	164.555	103.256	116.587	75.6427	11.6436	22.823	42636.5	6.44173	59.7585	12.9465	298.99	0.684077	71.5	11.9317	56.2929	2.53182	68.1446	6.72965	39.8778	2
330600	2022	153.13	105.686	82.2225	76.6929	11.7647	25.3696	45709	5.98291	59.7522	12.1666	311.778	0.839244	72.1	12.0126	55.7359	3.02392	66.6464	5.94272	38.7245	2
330600	2023	148.231	104.28	79.4485	74.168	11.581	23.3021	48825	6.25759	59.789	11.8842	331.057	0.940818	73.1	12.072	55.445	2.58496	67.942	6.82206	39.6702	2
330700	2008	98.8214	98.741	59.9111	129.953	8.47373	16.5803	8264	5.67673	44.0344	8.81696	64.2728	0.0542996	58.25	10.5037	59.1285	1.97085	53.814	9.76201	15.2453	2
330700	2009	104.437	98.8512	60.7911	126.224	10.6147	16.9848	9001	5.6588	44.3009	9.18891	68.801	0.0684431	58.4	10.5533	58.4173	1.87201	56.0192	10.1708	15.8508	2
330700	2010	105.639	99.1625	61.5748	131.704	9.82241	20.5632	10201	5.65591	45.3855	9.51357	82.2057	0.068944	59	10.7192	57.7724	2.31151	58.0764	10.4179	17.221	2
330700	2011	106.435	99.4375	62.9014	139.91	9.85885	17.3476	11877	5.75034	45.5992	9.82865	91.7026	0.086881	60	10.8667	56.5087	2.01854	56.881	10.1381	17.6251	2
330700	2012	108.674	98.1724	63.2775	144.928	10.3522	21.4271	13286	5.79824	46.1416	10.2145	94.6018	0.16976	61.4	10.9613	56.3423	2.29507	56.8792	10.2603	19.1577	2
330700	2013	110.383	97.4873	64.0932	153.588	11.7958	16.8893	16661	5.75544	45.9659	10.6538	95.1669	0.220945	62.2	11.0429	56.3775	2.28569	56.9273	10.6018	20.0423	2
330700	2014	94.2249	97.4281	67.0966	183.287	14.179	19.827	18544	6.09477	47.1798	10.8834	112.689	0.274781	63.3	11.1203	44.0129	2.50653	60.0942	10.0546	21.6705	2
330700	2015	94.3041	97.3996	71.5039	152.701	13.4802	20.4815	20297	5.7748	47.6487	11.1398	119.946	0.298147	64.5	11.1728	37.8796	2.29175	61.7637	11.7931	22.885	2
330700	2016	97.7002	97.8103	73.4324	137.848	13.4818	22.9119	21896	5.70844	48.6709	11.2633	139.785	0.292672	65.7	11.2465	36.0843	2.44701	62.3574	10.5871	24.3413	2
330700	2017	89.2493	98.2751	75.4106	154.487	13.9661	21.8765	23922	5.67066	49.2098	10.2417	145.851	0.309993	66.7	11.2796	40.7872	2.54974	67.131	8.81497	25.1734	2
330700	2018	90.4651	99.1477	76.5836	149.349	14.3629	22.7722	26218	5.85382	50.557	10.3974	154.683	0.336833	67.7	11.3368	38.5275	2.75712	68.8923	9.06969	26.7184	2
330700	2019	90.9495	99.9408	76.2924	137.142	14.2949	22.4638	28511	5.61218	51.1826	9.31216	175.685	0.429661	68.7	11.4369	38.2463	2.77821	65.0251	7.8731	27.6995	2
330700	2020	78.3682	101.446	74.7628	146.669	16.4889	22.2963	30364.5	5.78375	52.1938	8.32964	188.765	0.559748	68.19	11.465	44.1152	2.93592	61.5351	7.71742	28.3771	2
330700	2021	76.5315	101.718	73.9351	136.422	15.9686	25.4786	33709	5.65051	53.5196	8.01456	208.831	0.55634	68.7	11.5916	46.0817	3.08396	66.1295	8.54055	30.4983	2
330700	2022	76.7555	102.36	64.0302	132.84	15.2948	24.1294	35630	5.60603	53.5852	7.8625	225.609	0.697704	69.4	11.6255	47.4066	2.81476	66.043	7.70176	30.3888	2
330700	2023	76.8275	101.687	59.0068	124.895	14.7713	26.0134	38136	5.60643	54.0411	7.69988	240.942	0.802746	70.4	11.6994	47.0387	3.14869	67.0361	7.59039	31.568	2
330800	2008	116.063	100.402	52.4896	84.7593	7.10868	16.8577	6843	5.95201	44.5101	8.62057	47.2281	0.137528	40.99	10.0566	59.8233	2.08838	46.6369	12.9541	14.4437	2
330800	2009	123.404	100.108	52.484	81.6403	6.67401	17.8909	7336	5.87327	44.6636	8.83771	54.4082	0.128267	41.1	10.1297	59.4331	2.12454	47.879	13.4243	14.9644	2
330800	2010	127.188	99.5221	53.1342	77.4457	6.98506	19.8647	8270	5.76763	44.9066	9.03656	63.4661	0.118019	44.1	10.3113	59.0421	2.25432	47.2123	13.1848	15.8565	2
330800	2011	130.155	99.1842	45.5774	79.1629	7.44592	20.8527	9635	5.94635	45.0975	9.30643	69.6359	0.185337	44.8	10.5025	58.8007	2.26178	44.5411	12.7871	16.2279	2
330800	2012	133.758	98.6995	55.5029	78.6135	7.50586	18.5582	10714	5.94701	45.3203	9.56675	74.5189	0.263716	46.6	10.5574	58.2052	2.22685	45.3402	13.4133	17.1984	2
330800	2013	135.223	99.1829	65.3621	80.6897	7.9319	21.7029	13811	5.96329	47.3137	9.60221	78.6913	0.375431	47.7	10.635	58.0575	2.64106	45.8657	13.9948	20.2002	2
330800	2014	122.371	99.1475	64.0393	95.4635	9.14929	20.7672	15354	6.39779	47.8069	9.62746	87.1277	0.530205	49	10.683	53.3314	2.39008	48.8209	14.0902	20.6709	2
330800	2015	124.84	99.1821	62.4467	93.2538	8.87532	22.0612	16884	6.10493	48.0707	9.53887	93.7644	0.590334	50.2	10.7078	43.7467	2.57521	50.8404	16.1525	21.4551	2
330800	2016	124.724	100.795	61.5641	91.956	8.70451	22.1178	18421	6.29625	49.3209	9.17463	101.59	0.602934	53.7	10.7934	41.7456	2.80994	47.6646	15.5648	22.2946	2
330800	2017	106.986	101.775	60.7402	107.996	10.2312	22.4455	20225	6.22129	49.9492	8.0385	107.411	0.627669	55.7	10.8513	48.909	2.98361	54.946	14.0054	22.8823	2
330800	2018	103.773	102.128	59.8042	111.906	9.57208	21.5879	22255	6.51279	50.7631	7.7021	116.446	0.641653	58	10.9508	48.1891	2.68091	54.5172	13.7301	23.751	2
330800	2019	105.272	100.937	59.0014	105.828	5.66674	23.4932	24426	6.1458	50.8995	7.67063	127.103	0.681609	60	11.0188	47.0516	2.84242	52.1639	10.7212	24.9539	2
330800	2020	96.6748	100.968	58.4356	109.356	5.89797	22.2786	26290	6.17186	51.1444	7.39288	134.489	0.669493	57.57	11.0631	51.512	2.90446	50.1989	11.7359	25.4774	2
330800	2021	95.3328	100.436	58.1873	102.636	5.821	21.3096	29266.2	6.18452	51.5486	7.1369	133.734	0.794069	58.1	11.2021	52.1676	2.8151	51.8983	13.4829	26.7304	2
330800	2022	94.288	101.697	54.2612	96.3643	5.41073	24.011	31468	6.18327	52.8988	6.90091	140.704	0.951073	59.3	11.2715	52.0913	2.88252	51.5876	12.6011	28.0366	2
330800	2023	93.9878	101.517	53.6604	91.4976	4.97481	21.7568	33993	6.27842	53.2211	6.81395	146.785	1.07719	60.6	11.3337	51.6087	2.87419	52.0921	13.0172	28.8581	2
330900	2008	105.213	99.0154	66.7699	36278.1	10.055	17.188	22257	4.65224	38.369	89.5802	150.159	0.109153	61.91	10.8329	32.7429	2.18763	7.53227	11.4501	22.3671	2
330900	2009	108.448	98.9322	69.3204	33736.2	10.5167	20.4665	24082	4.73282	40.1535	93.012	146.501	0.106026	62.4	10.9207	32.5062	2.14717	8.13603	16.874	24.2136	2
330900	2010	100.679	96.7039	71.5162	37594.7	12.4453	20.7519	14724	4.79244	35.9088	95.6758	152.466	0.110196	63.6	11.1062	29.2427	2.2099	7.65164	18.5364	19.582	2
330900	2011	101.247	96.3062	74.9526	38907.1	13.605	20.1533	17139	4.9821	36.2803	101.952	144.96	0.117312	64.3	11.2856	27.7397	2.3492	6.80374	24.1414	21.0394	2
330900	2012	105.797	96.0813	83.7837	38723.3	14.3026	19.8202	19350	5.13156	37.3413	129.699	176.811	0.149163	65.3	11.3825	29.9034	2.462	6.57511	19.5834	22.9508	2
330900	2013	105.375	95.9483	93.3395	40911.4	15.0798	22.1428	21401	4.77979	37.7148	98.066	184.974	0.549757	65.8	11.4686	28.257	2.40454	6.05818	25.8156	25.0152	2
330900	2014	101.867	95.752	98.6589	45120.8	16.031	20.229	23783	4.97459	37.3317	104.335	174.105	0.306386	66.3	11.5534	31.6195	2.30201	5.69773	21.1344	26.2865	2
330900	2015	109.261	94.7305	104.423	45213.4	15.6258	21.7636	25903	5.01062	38.0636	112.378	207.301	0.383554	66.9	11.6285	29.7913	2.51731	5.24064	20.4837	28.2252	2
330900	2016	117.014	95.4411	110.208	45218	15.0388	23.3151	28308	5.00197	39.5816	112.677	217.674	0.430115	67.5	11.7595	31.4356	2.61608	4.8482	20.8267	30.3451	2
330900	2017	124.089	94.4153	117.417	45750.5	14.3396	20.5195	30791	4.977	39.6368	105.023	223.747	0.542986	67.9	11.7421	31.7058	2.78971	4.3328	19.8886	31.7285	2
330900	2018	122.573	96.419	122.176	48907.7	14.384	26.5628	33812	5.33893	42.0476	110.236	210.535	0.730985	68.1	11.8185	31.6677	3.08435	3.7486	19.6498	34.9589	2
330900	2019	128.406	97.6875	118.554	46965.7	13.2169	21.1469	36784	5.32877	42.8804	103.45	219.408	1.11633	68.6	11.8597	31.5155	2.64413	3.76776	17.6904	35.2615	2
330900	2020	126.514	100.015	118.536	47033.5	11.9158	22.2604	39096	5.46179	44.8022	97.3279	233.733	2.11101	71.9	11.962	33.8481	3.07789	3.63402	16.105	36.7229	2
330900	2021	122.905	101.281	117.037	51496.6	9.82484	22.6594	42945	5.41399	45.2695	95.2934	250.332	1.60202	72.2	12.0867	34.5978	2.71984	3.77509	14.2747	38.5298	2
330900	2022	121.919	104.105	112.422	49633.3	9.19232	24.2721	45924	5.01375	47.3129	93.1804	268.771	1.96661	73.2	12.2326	36.8588	2.83202	3.72204	13.7502	39.8286	2
330900	2023	126.203	103.703	108.408	46065.3	8.72107	23.135	49379	5.09574	48.6789	97.5373	319.354	2.22623	74	12.3156	38.8201	2.77693	3.85186	15.7984	41.1292	2
331000	2008	158.444	99.9248	71.3052	2206.44	6.51719	17.9793	9975	5.37605	45.4007	19.0704	85.7979	0.0759017	51.48	10.441	61.2887	1.96608	37.9182	8.46362	18.1932	2
331000	2009	152.354	99.5442	71.6317	2392.65	7.47358	17.5167	10873	5.33261	45.2476	19.4674	90.1661	0.07451	51.7	10.4709	58.4256	2.38937	37.8215	11.5869	18.4461	2
331000	2010	150.561	98.9148	72.2361	2682.25	8.32568	17.5217	12287	5.43113	45.3689	20.4201	110.138	0.0347141	55.5	10.6361	57.4041	1.80174	38.2377	11.698	19.2004	2
331000	2011	146.703	98.4365	70.1392	2855.67	9.38944	18.9196	14244	5.59236	45.8549	21.535	124.679	0.049729	56	10.7566	55.4344	2.2635	35.7837	14.0634	20.2665	2
331000	2012	147.945	97.9056	75.6536	2919.73	10.228	19.504	15829	5.76193	46.5407	21.6402	133.097	0.0957588	56.9	10.8049	54.677	2.36986	36.2047	13.646	21.709	2
331000	2013	152.787	97.4066	81.7886	3022.68	10.4003	18.8155	17523	5.70558	46.9054	19.3396	133.571	0.187916	58.1	10.8797	55.3899	2.33806	34.7664	15.4374	22.972	2
331000	2014	127.281	96.6552	81.4557	3823.49	12.8301	21.5499	19362	6.26596	47.6079	19.7994	142.352	0.237616	59.5	10.9461	47.1995	2.35277	35.2239	14.1204	24.1876	2
331000	2015	134.673	95.9991	82.0243	3876.08	12.6773	19.8062	21225	6.3062	47.66	19.7676	149.263	0.30834	60.3	10.9934	46.584	2.60999	34.1046	15.3078	24.9614	2
331000	2016	129.418	96.3621	84.2965	4183.18	13.5975	23.3357	23164	6.11136	48.6311	19.8037	157.345	0.364785	61.3	11.0818	41.6584	2.65765	33.1479	14.1548	26.6139	2
331000	2017	136.192	97.7999	86.4071	4011.52	13.0653	22.7177	25369	6.04202	49.8511	18.6067	160.576	0.384254	62.2	11.1934	41.8569	2.64512	33.0265	13.4396	27.8965	2
331000	2018	139.006	99.007	87.3295	3835.16	12.6836	24.613	27630.7	6.22745	51.5633	17.8888	169.686	0.467321	63	11.2969	41.1849	2.58682	32.581	11.0137	29.6317	2
331000	2019	140.851	99.8008	86.2311	3526.44	12.0491	23.4056	30220.8	6.08479	52.2969	16.8917	184.73	0.550282	63.7	11.3455	40.9997	2.65472	32.6317	9.27734	30.5962	2
331000	2020	138.825	100.918	85.447	3641.58	10.8591	23.8015	32188	6.09201	53.3237	15.2857	206.229	0.764803	62	11.3711	42.6772	2.67486	32.6245	10.6396	31.5908	2
331000	2021	139.266	101.362	85.2426	2824.41	8.67061	24.0317	35419.4	6.38359	54.9892	14.6148	228.622	1.14167	62.6	11.4667	43.0605	2.82319	33.7189	10.3294	33.3963	2
331000	2022	136.012	102.298	81.8241	2661.1	8.23984	29.1653	37700.2	6.37027	56.6439	14.0706	243.361	1.24033	63.9	11.5114	43.7094	3.16799	33.7774	9.61982	35.1931	2
331000	2023	134.856	102.045	81.8016	2541.25	8.16146	24.5361	40153.1	6.44824	56.5602	13.5594	248.799	1.4266	64.8	11.5452	43.3704	2.88245	32.318	10.2784	35.5523	2
331100	2008	317.368	95.1001	137.577	60.9089	2.66474	16.4799	5050	4.32136	45.6812	15.9056	86.8971	0.207845	44.9	9.89329	63.6316	2.07887	66.1867	12.1364	22.9734	2
331100	2009	318.203	95.4386	145.174	59.0436	3.28344	16.7602	5703	4.16999	46.2253	17.4154	93.0182	0.0974638	46.5	9.96337	59.975	2.23562	68.431	12.1825	23.9307	2
331100	2010	312.728	97.9033	153.411	63.9828	3.93074	18.3521	6537	4.12478	48.0093	18.264	96.7551	0.15525	48.4	10.1482	57.8197	2.02676	67.1675	13.2466	25.282	2
331100	2011	302.275	101.007	162.788	67.9539	4.55696	19.3676	7809	4.20357	50.2387	18.6841	108.425	0.245083	66.5	10.3661	57.4101	2.21155	65.7938	15.3743	26.8291	2
331100	2012	294.036	101.635	158.584	73.3876	5.14622	20.416	8855	4.15596	50.6054	19.0897	117.702	0.514146	52.5	10.4355	57.0148	2.27837	65.8403	15.3209	27.0599	2
331100	2013	274.952	106.302	147.692	76.5726	5.7793	22.5719	12171	4.0605	52.9813	18.1444	123.007	0.672758	53.8	10.5255	57.0806	2.36614	65.7697	18.7638	27.9913	2
331100	2014	254.005	104.802	146.506	78.5927	6.42912	23.5176	13635	4.30248	52.9206	17.3918	133.912	0.7197	55.2	10.5862	54.4525	2.61006	68.1592	17.982	28.5226	2
331100	2015	248.824	101.355	149.78	76.7656	6.86142	18.1903	15000	5.06092	51.9047	17.1501	140.775	0.645552	56.4	10.6315	43.7776	2.27694	68.0552	17.1055	28.6392	2
331100	2016	237.641	102.158	146.079	77.7078	7.40512	21.9405	16459	5.02305	52.8962	16.3161	153.192	0.409581	58	10.7179	42.2557	2.88034	67.1154	16.5159	29.5891	2
331100	2017	195.549	103.046	135.689	87.7925	9.09946	23.3316	18072	5.01031	53.0427	13.8457	158.665	0.321689	59.7	10.7473	50.3298	2.83536	67.7571	15.1093	29.11	2
331100	2018	191.314	102.858	133.624	84.8218	9.21576	22.7446	19922	5.18213	53.4056	13.4229	167.887	0.462646	61.5	10.8523	50.9426	2.90125	68.0345	13.842	29.7578	2
331100	2019	189.204	102.165	130.186	79.0001	8.96982	23.8121	21931	5.13621	53.5955	13.1427	188.185	0.733458	63	10.906	51.3665	2.69715	65.6171	12.1824	30.6051	2
331100	2020	185.813	102.909	126.506	76.2818	8.11311	28.1775	23637	5.14544	54.8888	12.8114	193.947	0.879151	61.8	10.9496	52.5564	3.26196	62.5217	12.142	31.9499	2
331100	2021	183.528	100.354	129.531	68.2587	6.57947	23.3396	26386	5.71878	54.5884	12.7368	208.745	0.974989	62.5	11.0562	53.1393	2.6297	67.244	12.0123	32.8191	2
331100	2022	182.451	101.659	120.351	66.6216	6.14259	24.5425	28470	5.61125	55.324	12.8901	226.974	1.26537	63.5	11.1282	52.9983	2.9498	66.1413	12.535	33.3006	2
331100	2023	181.355	102.675	140.471	64.7189	6.06888	23.8295	30811	5.88339	57.508	12.7602	246.371	1.60069	64.6	11.1973	52.0209	2.6849	66.9252	13.2226	36.1315	2
340100	2008	49.2311	99.7274	25.2289	99.4482	4.97086	10.4142	5367.86	6.74682	42.0052	1.71747	44.2679	0.12745	43.15	10.4401	57.7761	1.32647	47.6236	4.23229	9.46842	1
340100	2009	51.269	99.7594	25.1784	101.05	4.83505	9.99946	6065	6.84006	42.2504	1.84117	45.0143	0.10871	64.1	10.6637	55.9625	1.1541	47.531	5.30083	9.81357	1
340100	2010	51.3015	99.8557	25.284	100.603	5.3963	10.535	7117.47	6.8473	42.6384	1.94448	52.9566	0.0734004	68.5	10.9075	56.8656	1.24708	46.8901	4.71824	10.4562	1
340100	2011	77.5873	99.9323	28.1922	109.601	5.47025	12.6662	7861.57	6.76267	43.4157	3.69823	53.7183	0.0835416	64.6	10.8494	63.2585	1.3732	47.3918	7.15002	11.8773	1
340100	2012	77.7683	99.6557	37.7454	109.74	5.24847	14.7502	9081.2	6.27913	43.9155	3.92172	61.2492	0.156622	66.4	10.9787	64.3934	1.63779	48.8998	7.07175	13.4371	1
340100	2013	77.693	99.1569	47.6025	113.71	5.97228	12.8603	10352	6.17843	44.082	4.15043	65.0996	0.153616	67.8	11.0925	65.2574	1.64362	48.398	7.86311	14.4639	1
340100	2014	79.3507	98.9785	48.2385	109.558	5.73485	12.8696	14407.3	6.34097	45.2966	4.38283	68.4394	0.164347	69.1	11.1938	65.5386	1.3971	48.9748	6.94117	16.6456	1
340100	2015	80.438	99.0329	48.8834	111.441	5.81465	14.0529	15732.8	6.50942	46.0638	4.62601	77.8119	0.17074	70.4	11.2755	65.8459	1.71051	50.1794	7.12226	17.6845	1
340100	2016	81.4384	98.9447	49.4156	110.692	4.9006	13.521	17059	6.18537	46.0255	4.89058	84.9675	0.219627	72.05	11.3615	66.4078	1.58877	50.1364	6.98523	18.1538	1
340100	2017	81.9697	99.1985	50.0202	106.681	5.11892	14.1097	18594.4	6.19755	46.6633	5.11186	93.9096	0.226671	73.75	11.4537	67.5081	1.56236	50.6697	5.946	19.1044	1
340100	2018	74.355	99.6038	50.1428	118.048	5.42354	13.9539	20388.7	5.73346	46.7328	5.29036	98.9574	0.244829	74.97	11.5445	77.1067	1.65151	51.5644	6.70579	19.6467	1
340100	2019	74.555	99.5531	50.4994	118.953	5.50088	15.4971	22462.2	5.75538	47.5361	5.43047	108.207	0.254847	76.33	11.7134	76.9104	1.81102	52.0064	6.69	21.0174	1
340100	2020	75.9029	99.4747	50.657	128.223	5.22711	16.3375	24281.7	5.52101	47.8936	5.54903	118.434	0.34462	82.28	11.7641	75.9482	1.8909	52.417	7.18155	22.01	1
340100	2021	76.8704	99.8735	51.0223	120.465	5.00143	16.9001	26855.5	5.57964	48.9212	5.61341	134.175	0.433353	84.04	11.877	75.6306	2.01936	52.9833	7.09878	23.4889	1
340100	2022	77.0357	100.487	46.2291	121.233	4.90241	15.8147	28726.5	5.60078	49.2923	5.63812	147.961	0.591712	84.64	11.9195	74.8447	1.77554	52.4156	6.54361	23.854	1
340100	2023	78.0635	100.385	41.5234	119.845	4.7563	17.2548	31140	5.66857	49.9656	5.65796	144.363	0.735929	85.55	11.9549	73.8116	2.06175	51.5681	6.59893	24.9924	1
340200	2008	42.91	99.0989	22.698	82	4.01011	9.72871	5559	7.0173	41.8535	2.02942	43.4646	0.00228732	49.27	10.3884	57.8698	1.2649	46.9351	5.27981	9.22945	1
340200	2009	44.218	99.0915	18.4155	76.4303	4.11395	11.3204	6143	6.96646	41.9979	2.13549	49.464	0.0656487	66	10.5764	58.3529	1.47882	47.4024	5.77059	9.46797	1
340200	2010	43.9715	99.2237	42.3353	82.5274	3.76651	12.1986	7145	6.84127	43.4957	2.26937	57.6945	0.0647537	65.6	10.7853	59.2702	1.53184	49.7935	5.18483	12.0467	1
340200	2011	82.8984	99.6609	42.6421	105.294	3.91631	10.9249	8413	7.14348	44.379	3.91921	57.9574	0.0633893	56.3	10.6696	51.3597	1.3222	45.8698	8.41675	13.2761	1
340200	2012	81.7761	99.8221	42.7181	115.628	4.48083	12.2738	9675	6.75618	44.5517	4.08366	60.3324	0.163325	58	10.7969	51.9158	1.61887	45.6318	7.30087	13.9719	1
340200	2013	80.7523	99.4807	42.9411	123.085	4.55065	11.1162	10962	6.67746	44.4817	4.25896	59.9157	0.167305	59.4	10.9079	53.0757	1.50731	44.2331	7.95766	14.3509	1
340200	2014	82.294	98.9633	43.3909	126.636	3.09285	12.2943	14606	6.76208	45.5928	4.44108	59.9119	0.149336	60.7	11.0032	54.2083	1.38117	43.728	7.43857	16.4857	1
340200	2015	83.3689	98.6913	43.9663	131.626	3.29474	16.2448	15964.4	6.94371	46.6716	4.64195	63.786	0.176863	61.96	11.0645	54.7068	1.6959	44.0925	7.21888	18.056	1
340200	2016	82.5656	98.9948	44.4128	132.314	3.12556	13.8672	17307	6.56452	46.4032	4.83094	69.5473	0.219967	63.46	11.1501	56.4864	1.38938	43.2012	6.74511	18.131	1
340200	2017	81.5711	99.6641	44.8646	136.489	3.34717	14.6594	18830	6.58355	47.231	4.73084	64.9141	0.21715	65.05	11.2434	58.2888	1.87524	46.1149	5.77493	19.0904	1
340200	2018	72.9788	100.038	47.521	151.018	3.71225	15.8453	20649	6.3009	47.808	4.83174	67.8362	0.230021	65.54	11.3419	67.9649	1.61873	49.1462	5.78485	20.1755	1
340200	2019	72.8735	100.011	40.8544	148.299	3.3857	14.2301	22745	6.30383	47.7873	4.90458	79.0537	0.248875	66.41	11.4379	67.7781	1.93448	50.1745	4.60117	20.3679	1
340200	2020	73.8221	99.9789	44.1318	149.905	2.20941	17.4486	24473	6.0775	48.714	5.01145	90.1047	0.316496	72.31	11.4771	67.3896	2.11392	50.1189	7.8115	22.0209	1
340200	2021	75.0807	100.408	45.274	147.121	2.0211	14.7919	27202	6.21831	49.4114	5.08068	85.2196	0.383307	72.99	11.6164	66.2278	1.70711	44.9384	8.03133	23.0763	1
340200	2022	75.0279	100.843	47.0433	147.694	1.98499	13.3821	29210	6.26911	50.0385	5.1794	98.688	0.497081	73.55	11.6642	65.581	1.56698	44.2074	8.10761	23.9945	1
340200	2023	76.5791	100.616	48.8899	145.472	1.9128	15.1023	31517	6.33345	50.9903	5.24959	101.093	0.640167	74.46	11.7159	64.1259	1.74294	44.5616	7.93878	25.6761	1
340300	2008	114.513	99.5953	36.5925	96.25	9.48864	11.1161	4299	5.5979	41.3403	8.06036	33.247	0.0096629	27.98	9.51594	72.4863	1.37143	55.2364	5.39298	10.5581	1
340300	2009	116.841	99.7697	37.1952	103.179	9.13858	10.6023	4727	5.64621	41.5535	8.37596	34.7114	0.130557	46.6	9.59927	73.6582	1.30986	57.0929	9.10352	10.7916	1
340300	2010	119.017	99.7332	37.7315	103.89	8.86697	11.9747	5565	5.71872	42.102	8.88687	40.407	0.165384	45	9.77465	73.3749	1.43316	59.1645	8.73964	11.5847	1
340300	2011	120.083	99.8445	36.6515	106.596	9.06329	13.3277	6615	5.7679	42.6331	9.20708	45.1131	0.182861	46.6	9.96867	73.5851	1.66792	57.0359	10.6447	12.321	1
340300	2012	117.01	99.5731	39.3127	108.757	9.73554	14.938	7673.96	5.73159	43.0912	9.34905	48.0353	0.245051	48.3	10.0943	72.1924	1.60445	55.971	11.6909	13.2976	1
340300	2013	117.688	99.1835	42.161	113.353	9.48292	13.4641	8741	5.76021	43.1597	9.8005	49.5333	0.260131	49.7	10.2216	72.6647	1.66129	54.8848	12.1022	13.8011	1
340300	2014	120.264	99.0427	43.8327	109.831	9.06037	13.4233	10511.1	5.85948	43.7806	10.0626	53.1943	0.275287	50.9	10.3424	73.7693	1.669	55.1295	11.2535	14.9028	1
340300	2015	121.64	99.0826	45.1602	109.735	9.35706	13.166	11551.6	6.03289	44.2713	10.2517	54.0783	0.288461	52.22	10.4132	74.3684	1.44347	54.5278	10.6823	15.5894	1
340300	2016	123.192	99.1644	46.6334	110.361	8.73718	11.4165	12591.2	5.80435	44.1729	10.5246	56.0294	0.346409	53.74	10.5042	75.3315	1.50384	52.3332	10.9986	15.821	1
340300	2017	124.912	99.5733	47.757	108.499	8.86067	15.4903	13768.5	5.8278	45.3778	10.7953	58.6924	0.364614	55.31	10.614	75.7316	1.95001	52.6055	9.32388	17.3249	1
340300	2018	122.05	99.8087	47.6534	115.041	8.54279	13.4348	15114	5.37274	45.0183	10.7536	59.2374	0.378646	57.22	10.7067	81.6411	1.44809	52.1845	8.65271	17.3447	1
340300	2019	122.755	99.6409	58.2504	109.09	7.33005	17.4109	16666	5.47959	46.6676	11.0061	65.7691	0.364535	58.58	10.8835	81.3365	1.93093	49.9411	9.07941	19.8049	1
340300	2020	123.673	99.7401	59.1254	106.968	7.01004	15.4691	18016	5.4445	46.7844	11.3567	73.2936	0.429646	55.08	10.8948	81.0094	1.75634	48.2698	11.7998	20.1865	1
340300	2021	123.301	100.012	68.9553	106.211	6.84511	17.1332	19538	5.50603	48.1053	11.5564	82.5275	0.548513	56.9	10.8473	81.1492	1.91262	49.071	12.0406	22.1027	1
340300	2022	124.302	100.196	58.7504	103.644	6.42627	17.4325	20687	5.51841	48.0748	11.8717	91.1594	0.927569	57.92	10.8588	80.9024	2.1386	50.3388	11.3217	21.9215	1
340300	2023	125.215	100.197	48.5846	101.193	6.01966	17.4928	22334	5.55966	48.0918	12.1369	89.7113	1.04686	59.65	10.9084	80.8662	1.95277	50.7617	11.608	21.9542	1
340400	2008	49.4588	99.8567	20.8137	177.421	1.69421	11.3067	4440	6.33126	41.4374	3.17731	24.2557	0.00448103	46.9	9.8433	86.0275	1.50279	55.2162	5.78555	8.62386	1
340400	2009	49.3261	99.8375	20.8516	175.397	1.77497	9.89435	4893	6.52064	41.5225	3.32639	25.5053	0.0367318	64.1	9.95126	85.739	1.17739	55.3906	7.71043	8.67231	1
340400	2010	50.1444	99.6927	20.9421	168.221	2.00907	11.7469	5746	6.5572	42.0162	3.42467	29.0927	0.0549143	62.9	10.116	85.4252	1.34878	56.1046	8.38204	9.48387	1
340400	2011	50.5082	99.8131	17.6925	167.682	1.95028	10.2628	6795	6.66578	42.0697	3.51644	32.6837	0.0758104	63.7	10.2713	85.0421	1.19785	54.3088	8.71129	9.52036	1
340400	2012	48.9869	99.8307	21.2135	173.719	2.21278	12.2019	7835	6.57939	42.7119	3.61784	34.029	0.0976995	65.3	10.3755	84.0911	1.38715	54.5689	8.05736	10.6316	1
340400	2013	49.5676	99.6423	24.7932	169.779	2.5352	10.5843	8879	6.56431	42.8007	3.68593	36.7702	0.0854635	66.7	10.4246	83.7046	1.34173	54.243	7.93454	11.1396	1
340400	2014	50.7166	99.4249	24.9673	175.294	2.60097	12.7767	10547	6.73172	43.6793	3.78108	36.1027	0.0820107	67.9	10.3868	83.5223	1.67466	54.4104	9.22651	12.4951	1
340400	2015	101.149	99.5142	58.1974	214.876	2.24512	13.3238	10138.6	6.80587	45.7142	8.7701	57.9401	0.158657	60.67	10.0649	87.8613	1.55147	46.8871	9.55129	16.0207	1
340400	2016	103.143	99.5301	58.5031	209.871	2.27019	11.3275	10848	6.47486	45.2737	9.16872	31.0135	0.254657	62.05	10.1177	88.0677	1.32886	46.2378	11.3564	15.9013	1
340400	2017	102.826	99.5503	58.7674	209.026	2.29755	13.5894	11841	6.65768	46.0997	9.26428	33.2229	0.256844	63.46	10.2104	87.7595	1.44151	47.0351	10.0332	16.9289	1
340400	2018	118.676	99.6275	58.9871	180.946	1.88937	14.0215	12926	6.01979	45.9532	9.40114	39.5205	0.315349	64.11	10.2771	93.3181	1.73185	55.3032	10.0871	17.5419	1
340400	2019	119.353	99.4655	59.3042	171.578	1.9396	15.8333	14250	6.05205	46.5713	9.51173	42.3203	0.290147	65.04	10.4087	92.3973	1.84602	52.6017	9.2871	18.5952	1
340400	2020	120.666	99.5938	59.5481	162.006	1.93155	15.7161	15419	5.84188	46.7157	9.60223	47.5339	0.34217	61.08	10.4411	91.6624	1.66632	51.9774	17.9565	19.1047	1
340400	2021	121.901	100.015	59.5413	156.965	1.94445	17.082	16706	5.98375	47.6008	9.67854	52.1268	0.470363	61.91	10.5283	91.3401	1.75807	52.2816	22.5085	20.1056	1
340400	2022	121.806	100.404	59.304	156.878	1.96048	16.9071	17722	5.97574	47.9807	9.81418	56.5464	0.760367	62.05	10.5895	91.3419	1.97889	52.7129	18.8613	20.5664	1
340400	2023	125.056	100.373	59.0857	152.643	1.92411	17.4406	19105	6.07863	48.5355	9.88779	56.519	0.904311	63.29	10.6127	88.444	1.79497	54.0549	18.064	21.4435	1
340500	2008	31.5774	99.0532	16.7705	76.2864	3.32443	10.4739	6326.4	6.87404	41.6753	1.50509	14.8985	0.00515223	49.23	10.8132	66.2183	1.20441	38.5454	3.6475	9.00662	1
340500	2009	31.3028	99.1973	16.9289	62.0104	3.47406	9.8059	7172.2	7.05868	42.0484	1.57473	15.0166	0.0544063	67.3	10.8547	68.1434	1.18808	37.2106	3.86726	9.40228	1
340500	2010	31.6262	99.2678	17.08	60.0298	3.49491	12.2343	8018	7.02526	42.6554	1.60531	17.026	0.05072	69.1	11.048	68.9428	1.55948	38.7576	3.80442	10.2891	1
340500	2011	78.1968	99.59	36.1886	68.0264	4.006	10.4969	9505	7.32712	44.423	4.22206	58.3078	0.0531288	59.4	10.8208	61.3472	1.23804	50.8251	8.46007	13.2146	1
340500	2012	79.8394	99.8859	42.4168	70.3444	3.89512	10.873	10920	6.63436	44.5676	4.24529	68.1461	0.17114	61.2	10.8956	63.0799	1.42469	52.5208	7.81868	14.217	1
340500	2013	77.6351	99.8308	48.686	69.0236	3.81315	14.4184	12339	6.62964	45.7634	4.53799	73.607	0.186643	62.6	10.9438	65.1247	1.56177	50.5199	8.53028	16.0733	1
340500	2014	77.3916	98.9957	49.1799	71.8774	4.40122	11.9231	14969	6.84995	45.9387	4.70943	78.8263	0.19479	63.9	10.9798	66.6715	1.34008	50.0654	9.82856	17.0326	1
340500	2015	78.4254	98.228	50.0671	72.7898	4.23588	13.3164	16331.2	7.02206	46.4322	5.0057	85.5208	0.19695	65.15	10.9979	67.7162	1.5824	50.0094	9.8899	18.1278	1
340500	2016	79.7525	98.0876	51.0433	72.8079	4.35916	12.5225	17719	6.66069	46.2843	5.2331	88.4749	0.25002	66.49	11.0857	68.5483	1.4802	48.1682	9.50364	18.6005	1
340500	2017	82.2115	98.2451	52.6578	71.3634	4.3214	14.3471	19358	6.67514	47.1781	5.08235	89.6452	0.264712	67.89	11.2209	68.694	1.81514	47.79	7.44392	19.9513	1
340500	2018	81.6088	99.0842	53.1445	72.1533	4.4457	14.2249	21267	6.1621	47.4859	5.50277	87.9419	0.279643	68.25	11.3357	76.8941	1.96814	46.6779	6.08954	20.6949	1
340500	2019	82.2295	99.3806	53.4757	70.2531	4.42228	12.5878	23473	6.16837	47.9591	5.47105	97.8279	0.282813	69.12	11.4315	76.4868	1.61387	46.4465	6.78606	21.5372	1
340500	2020	82.7937	99.763	53.5026	66.8657	4.48035	14.7068	25421	5.95601	48.7433	5.59458	104.861	0.317575	71.69	11.4691	76.0191	1.75954	45.9347	9.20455	22.8351	1
340500	2021	82.7424	100.827	52.2444	66.3328	4.38634	15.7779	28331	6.00036	50.1085	5.58454	110.632	0.4059	72.39	11.5803	75.7632	1.72263	46.0595	9.81042	24.439	1
340500	2022	82.2119	101.561	46.8268	65.9081	4.34254	17.0753	30363	6.04888	50.9387	5.67267	115.981	0.489158	72.9	11.6178	75.0198	2.19688	45.3358	8.877	25.2888	1
340500	2023	83.2239	101.431	41.6166	62.5144	4.15058	16.1091	32670	6.13485	51.1913	5.73554	117.111	0.666093	73.62	11.6344	73.1491	1.75879	45.8245	9.14185	25.8844	1
340600	2008	120.42	99.8642	52.9905	88.968	1.84304	11.5291	4096	4.44796	41.4403	8.94584	38.4352	0.0252752	43.2	9.69141	89.9791	1.29071	59.1522	7.23262	11.4583	1
340600	2009	118.624	99.8985	54.1697	99.0762	1.5039	13.6848	4547	4.6409	42.1728	9.55431	42.1116	0.054103	56.1	9.74559	91.4014	1.58196	59.8247	8.33267	12.2505	1
340600	2010	120.229	99.7918	58.7813	110.514	1.42785	10.593	5337	4.71469	42.1614	10.0391	47.2091	0.141763	54.5	9.95342	91.7855	1.21151	60.5202	8.25981	12.499	1
340600	2011	120.111	99.5912	62.2519	111.52	1.3583	10.4863	6313	4.73481	42.5086	10.5098	45.547	0.149559	55.7	10.1274	93.0507	1.24976	57.5513	7.80166	13.2548	1
340600	2012	107.13	99.4033	61.1573	127.084	1.63837	12.2854	7286	5.07687	43.1743	10.8459	48.0154	0.193324	57.2	10.2551	92.3213	1.40872	56.6132	9.60619	13.9278	1
340600	2013	108.266	99.3807	60.061	123.227	1.94108	12.1798	8240	5.10165	43.3658	11.3932	54.1755	0.185019	58.5	10.3983	92.2992	1.57494	57.1668	10.2657	14.3245	1
340600	2014	110.28	99.2013	60.8271	119.91	3.38788	10.639	9116.01	5.23355	43.4021	11.8213	55.3539	0.177093	59.8	10.4711	92.7034	1.27759	56.7768	9.53687	14.624	1
340600	2015	112.087	99.3578	61.539	118.412	1.68317	12.7911	9881.74	5.39518	44.2999	12.3845	51.6275	0.183277	60.76	10.4666	92.4407	1.67937	55.7173	8.81885	15.5851	1
340600	2016	113.442	99.5791	61.9548	115.575	1.07145	14.8135	10653	5.21725	44.7833	12.8066	51.4335	0.236867	62.13	10.5138	92.7317	1.789	51.9236	8.83458	16.3338	1
340600	2017	115.321	99.5882	62.3717	107.36	0.937832	15.4548	11611	5.25326	45.2173	11.3854	53.908	0.244275	63.61	10.6592	92.8808	1.68043	53.1443	9.66018	17.0176	1
340600	2018	126.532	99.66	62.7675	97.0864	0.926541	15.7625	12745	5.2302	45.6629	11.6648	55.6298	0.289126	65.11	10.7187	94.9516	1.84162	55.7455	7.93462	17.856	1
340600	2019	127.164	99.6834	63.6707	113.719	0.921421	14.8459	14052	5.42265	46.1172	11.7618	63.9718	0.284885	65.88	10.8041	94.5667	1.7411	54.4554	7.74289	18.5122	1
340600	2020	127.748	99.7419	64.5061	111.956	1.00537	15.8743	15218	5.4279	46.6556	12.1916	77.2655	0.353434	64.16	10.8415	94.4197	2.06597	54.3875	9.89056	19.3727	1
340600	2021	127.992	100.063	65.1359	115.805	0.983653	16.9722	16504	5.48409	47.3906	12.4099	79.8656	0.450112	64.78	10.9303	94.2366	1.98935	51.6917	10.1112	20.315	1
340600	2022	127.348	100.351	65.5761	115.407	0.987573	14.0724	17495	5.4674	47.3144	12.4949	82.986	0.749616	64.92	10.9983	94.8721	1.71355	51.5472	10.6605	20.2872	1
340600	2023	127.117	100.276	66.0618	114.259	0.989043	17.3285	18807	5.49799	48.1937	12.5816	85.3325	0.875063	65.64	11.0476	95.0519	2.0311	52.7396	10.617	21.6081	1
340700	2008	73.0534	99.5191	13.2876	40.4468	1.35727	10.6389	5573	4.99186	39.9191	3.88364	104.149	0.00821114	58.82	10.6925	72.2741	1.24556	44.5559	4.58336	8.20463	1
340700	2009	78.5125	99.4278	13.4576	36.3983	0.00049966	11.9553	6194	4.78898	40.1439	3.99066	113.73	0.0322026	76.4	10.7463	70.4434	1.34489	45.985	4.21519	8.77371	1
340700	2010	78.6099	99.1539	13.5986	36.7274	0.000510819	11.3782	7266	4.63642	40.0676	4.12125	48.3916	0.0261914	73.5	11.0518	69.9889	1.4268	45.0157	3.84077	9.13453	1
340700	2011	78.5605	99.0934	13.7759	35.9805	5.39396	12.2001	8562	4.54952	40.1843	4.26349	114.44	0.0339903	74.9	11.2656	72.2778	1.41648	43.6448	3.35817	9.90545	1
340700	2012	75.5047	99.0169	13.3361	38.1902	5.8306	11.4274	9847	5.099	40.8828	4.41317	115.446	0.0465534	76.3	11.3354	69.0481	1.53609	43.2314	4.63344	10.5697	1
340700	2013	76.0357	99.0628	12.8802	37.7974	1.48133	13.589	11186	5.26532	41.9462	4.56691	117.719	0.0589579	77.6	11.4266	69.179	1.42573	41.3756	4.95352	11.7026	1
340700	2014	79.4632	98.8384	13.0316	38.1978	1.48213	11.2965	16405	5.20964	42.8321	4.70455	123.384	0.0619954	78.7	11.4831	70.2325	1.3504	40.5426	5.18974	13.9165	1
340700	2015	77.8055	98.5978	45.1753	76.6168	3.49693	12.6034	11169.1	5.68656	43.5113	4.88715	50.0101	0.231821	52.73	11.7242	70.3067	1.51705	40.1663	5.42949	14.3812	1
340700	2016	78.3078	98.5867	46.3501	54.111	3.08735	14.0429	12054	5.51764	43.8723	5.05928	55.2683	0.283217	54.14	10.9328	71.2604	1.61371	41.158	9.23597	15.1222	1
340700	2017	79.3211	99.2416	47.4109	57.7956	2.98569	15.2897	13145	5.56382	44.7379	4.90957	57.3004	0.300925	55.79	11.0916	72.6749	1.72155	41.4567	7.70441	16.0483	1
340700	2018	79.1509	99.7094	47.9685	60.5036	3.00083	14.3167	14335	5.75194	45.3141	4.7559	61.1957	0.312062	55.99	11.1772	72.4232	1.5796	42.9698	7.86783	16.6036	1
340700	2019	79.088	99.7792	37.7291	61.8494	2.90211	17.2595	15791	5.75844	45.7018	4.77336	65.3969	0.300538	57.16	10.9356	72.343	2.03702	43.622	7.79898	17.0493	1
340700	2020	79.9468	99.9683	40.7986	62.066	3.04956	15.4533	17102	5.6027	45.825	4.8288	76.208	0.326264	66.17	10.9863	71.4045	1.63604	45.2405	11.2326	17.5623	1
340700	2021	79.788	100.244	43.7493	62.6521	2.87056	16.3109	18992	5.69681	46.8194	4.88461	82.4781	0.402684	66.33	11.1418	71.5587	2.03482	45.6551	10.6218	18.9622	1
340700	2022	79.3602	100.877	46.3926	64.0909	2.80429	18.9494	20264	5.72196	47.9866	4.23613	90.5737	0.441221	66.45	11.1848	71.5768	2.11485	47.0065	10.5273	20.3378	1
340700	2023	81.4784	100.697	49.0739	63.587	2.65768	16.6532	21865	5.77124	48.1727	4.1394	95.2771	0.588574	67.2	11.1996	69.4853	2.07753	47.141	10.1917	20.9787	1
340800	2008	119.778	99.4932	40.5003	58.478	3.66033	10.0599	5168.19	5.76586	42.0325	3.72608	45.1659	0.0265368	17.74	9.34832	59.7035	1.2953	42.4601	9.47266	11.2843	1
340800	2009	123.747	99.252	40.914	66.676	3.67019	9.504	5665.6	5.89259	42.1509	4.00286	45.5153	0.165015	36.6	9.43454	58.3286	1.2064	42.5912	13.2392	11.5817	1
340800	2010	125.933	99.2201	41.3353	68.7025	3.90933	13.5482	6213.36	5.76807	42.8096	4.26199	50.1342	0.201877	36.8	9.6835	57.9832	1.43223	43.1517	14.8763	12.6332	1
340800	2011	124.922	99.4681	31.1919	74.1582	4.48479	11.0233	6816.82	5.93677	42.3254	4.54114	54.8242	0.243318	38.1	9.88583	58.3187	1.39154	42.7108	15.0421	11.6901	1
340800	2012	126.259	99.5406	41.9835	80.5874	4.14011	12.6516	7481.9	5.54317	42.9196	4.81088	58.4374	0.29332	39.6	9.995	58.5155	1.4577	42.9057	15.5353	13.0598	1
340800	2013	127.987	99.1556	53.0795	87.0888	4.22006	10.0792	8215.19	5.42283	42.9648	5.11585	59.4878	0.331601	41	10.035	58.4264	1.31276	41.5141	15.5895	13.8155	1
340800	2014	131.725	98.8185	53.8384	86.1758	3.91532	13.0973	9024.02	5.61236	43.7844	5.44218	61.1858	0.319143	42.2	10.1215	57.9809	1.47705	41.39	15.0178	14.9968	1
340800	2015	110.694	98.8635	45.2325	100.483	4.61583	15.0481	9985.17	5.98526	44.1657	4.95122	63.38	0.260837	45.87	10.0338	55.1342	1.80099	42.369	16.0627	14.9586	1
340800	2016	108.727	99.1124	46.4477	104.413	4.66211	15.9713	10814	5.65738	44.3317	5.3203	70.862	0.302683	47.19	10.2731	57.3416	1.94018	41.4907	15.8956	15.4676	1
340800	2017	108.403	99.5338	46.8403	102.053	4.52706	15.8887	11814	5.71805	44.8442	5.36255	71.2324	0.335486	48.57	10.3791	57.3565	1.80324	40.5158	13.5524	16.0192	1
340800	2018	94.9097	99.8796	47.9788	110.578	5.16078	13.6866	12990	5.64965	44.8171	5.56891	74.08	0.299312	49.22	10.5001	61.9905	1.61123	42.3134	14.8039	16.0334	1
340800	2019	95.0566	99.5088	48.4105	104.827	4.50196	14.0762	14347	5.65137	45.1347	5.77455	81.992	0.361245	49.98	10.7146	61.933	1.62415	42.0237	14.4081	16.8148	1
340800	2020	93.3162	99.8081	48.5104	110.139	4.28635	16.5574	15567	5.51229	45.8261	5.91739	95.6818	0.463007	55.52	10.7534	63.374	2.03192	41.8783	16.0482	17.8166	1
340800	2021	93.4811	100.354	48.3462	106.163	3.56251	18.3289	16975	5.58034	46.8	5.97947	98.054	0.511746	56.17	10.83	63.2086	1.87233	40.2375	17.425	18.893	1
340800	2022	92.7365	101.238	47.7616	91.68	3.18174	13.1737	18130	5.62452	46.6954	6.05909	102.458	0.637827	56.29	10.8763	62.8776	1.60038	39.6096	17.7204	18.4797	1
340800	2023	93.6798	100.842	47.3697	76.23	2.76467	18.7136	19526	5.6826	47.8377	6.18325	100.693	0.737673	57.49	10.9135	61.988	1.91163	39.3714	18.1751	20.2268	1
341000	2008	136.408	97.8434	46.109	65.2122	8.33003	10.154	5160	5.1425	40.8684	6.22992	39.4368	0.0340566	24.07	9.73183	51.5186	1.10966	46.7732	9.96281	11.6985	1
341000	2009	142.449	98.4009	46.7829	61.4178	9.09793	11.0347	5704	5.27679	41.5603	6.75273	69.1061	0.035257	39.8	9.79603	50.053	1.38111	47.8179	12.3034	12.3728	1
341000	2010	143.651	98.5416	47.4096	64.8122	9.34572	13.4464	6716	5.39702	42.4158	7.32754	79.4077	0.177909	41.1	9.94717	49.8492	1.45687	50.1952	11.8425	13.4676	1
341000	2011	144.932	98.5295	39.7441	64.8211	9.73083	10.3057	7952	5.56926	42.0407	7.7978	91.898	0.159354	42.8	10.1495	49.7912	1.27838	50.8302	12.7487	12.9616	1
341000	2012	148.977	97.1648	49.0069	69.7251	9.64312	13.4381	9161	5.27415	42.4496	8.54535	96.9876	0.229606	44.4	10.2698	49.7	1.43832	51.0541	11.5309	14.814	1
341000	2013	154.516	95.8066	59.6096	78.5338	10.5073	12.6675	10389	5.19379	42.5082	9.29395	107.611	0.398909	45.7	10.3706	49.7232	1.50511	51.3977	12.8329	16.173	1
341000	2014	161.228	95.749	61.9696	80.4698	10.5556	13.1422	10942	5.39813	43.0729	9.90466	141.097	0.473306	47	10.444	49.6561	1.40806	51.8844	12.4206	16.9415	1
341000	2015	164.407	96.5101	66.1339	81.7771	11.4482	15.1217	11872.1	5.59856	44.3372	10.4939	117.052	0.494423	48.28	10.4898	49.0554	1.71997	51.6654	12.656	18.2927	1
341000	2016	163.402	99.6686	70.7835	71.4913	11.4143	16.2346	12869	5.43069	46.1386	10.8021	121.405	0.522231	49.56	10.5707	48.895	1.76785	49.8621	15.3394	19.377	1
341000	2017	156.33	101.355	77.1087	72.0492	11.5586	13.1007	14034	5.53189	47.0159	10.3267	128.272	0.512695	50.9	10.6287	48.5928	1.5266	50.3944	14.822	19.8623	1
341000	2018	119.907	102.276	75.7428	91.1073	14.2238	14.1196	15391	5.76825	47.7394	10.3294	139.492	0.625984	51.46	10.7254	52.851	1.70423	53.685	12.5792	20.1409	1
341000	2019	120.399	101.02	76.042	86.7982	14.2075	14.7208	16970	5.74995	47.7244	10.2016	161.003	0.641063	52.49	10.9133	52.0736	1.97853	54.0955	10.2663	21.0339	1
341000	2020	115.722	101.503	75.988	88.1981	13.7941	17.415	18311	5.61483	48.5459	10.2211	175.533	0.773649	58.29	10.9516	53.7476	1.85324	52.0044	12.3648	22.0813	1
341000	2021	114.622	101.406	75.9922	86.7665	13.461	15.8063	20298	5.67553	48.8456	10.2501	190.095	0.996286	59.25	11.0702	53.5209	2.0399	51.7155	13.4286	22.7783	1
341000	2022	112.463	103.001	74.805	85.8432	13.5375	17.5818	21712	5.69491	50.1069	10.1568	196.181	1.16162	59.38	11.1297	53.2039	2.13049	50.3908	13.9894	23.7407	1
341000	2023	112.516	102.498	73.9837	82.2676	13.1003	16.138	23465	5.77664	50.1969	10.3236	205.152	1.26751	60.23	11.1793	51.8224	2.08271	46.0116	14.4523	24.302	1
341100	2008	73.5846	99.7755	30.1844	48.4722	2.36039	9.08172	4282.4	6.0665	41.3447	4.23199	34.1287	0.0298207	20.99	9.361	79.5345	1.0589	50.3249	10.8777	9.17662	1
341100	2009	73.9119	99.6983	30.4924	47.7711	2.3442	9.70441	4776.2	6.21679	41.7155	4.601	35.6362	0.0760081	41	9.45697	79.6085	1.09846	50.2478	17.562	9.64082	1
341100	2010	74.5291	99.7501	30.7859	50.8876	1.94605	11.8628	5270	6.24772	42.2739	4.98858	38.0161	0.100201	41.6	9.64416	80.1065	1.38708	49.3626	15.6885	10.3472	1
341100	2011	75.0511	99.9892	41.9137	55.0697	2.28003	10.567	6251	6.28965	42.9982	5.26857	42.2438	0.0957348	43.4	9.84048	80.8091	1.22317	49.0572	18.9033	11.5441	1
341100	2012	75.7271	99.774	42.0955	56.8927	2.30262	10.8993	7208	5.8472	42.7596	5.5441	45.621	0.152169	45.1	9.9745	81.3609	1.39515	48.4504	17.0539	11.8981	1
341100	2013	76.561	99.4338	42.4224	57.8343	2.36461	11.1015	8180	5.80586	42.8793	5.71655	47.9984	0.156823	46.5	10.0926	81.2647	1.35358	47.5421	17.8611	12.4345	1
341100	2014	77.7214	99.0866	42.9016	59.7089	2.37345	12.4642	9171.01	5.95589	43.3957	5.97495	49.3577	0.162409	47.8	10.204	81.9642	1.52577	47.6313	18.3702	13.3079	1
341100	2015	79.0661	99.0423	43.5832	62.4549	2.45689	11.5734	10069.8	6.08888	43.6496	6.22964	49.4965	0.174404	49.02	10.2777	82.2302	1.34872	46.9622	17.786	13.7288	1
341100	2016	80.4608	99.1365	44.0526	64.4841	2.46098	12.8918	10956	5.77864	43.8345	6.3311	49.4694	0.246012	50.4	10.3526	82.3972	1.60251	45.4431	17.6471	14.3406	1
341100	2017	81.0095	99.5022	44.273	67.5346	2.44318	14.0214	11947	5.87484	44.5398	6.22653	50.3022	0.225143	51.89	10.4727	82.5197	1.76803	45.4567	13.927	15.1328	1
341100	2018	81.6417	100.135	44.2135	67.8521	2.42762	14.6697	13127	5.51799	44.8428	6.47021	52.8703	0.248802	53.42	10.5888	91.937	1.69853	46.673	10.5763	15.7013	1
341100	2019	81.4815	100.005	44.2132	71.5919	7.7013	12.7115	14487	5.59704	44.6793	6.51691	60.6461	0.241605	54.54	11.0656	91.7132	1.56004	44.9618	8.72636	16.0376	1
341100	2020	81.6805	99.8764	44.2751	70.4755	7.54967	16.5705	15732	5.6322	45.6074	6.60683	68.5863	0.306419	61.84	11.1081	91.2625	1.88026	45.0382	15.418	17.4123	1
341100	2021	81.9535	100.327	44.1309	69.7368	7.39035	13.8217	17400	5.66559	45.8379	6.61927	75.953	0.426562	62.92	11.2125	91.0414	1.65588	47.0172	15.3512	17.7471	1
341100	2022	80.8265	101.283	43.208	69.5381	7.28869	16.2206	18630	5.6459	46.8688	6.57622	68.9098	0.53011	63.12	11.2837	90.5754	2.08004	46.1228	15.5398	18.7387	1
341100	2023	80.3557	101.028	42.4085	68.96	7.14754	14.1118	20176	5.74358	46.9033	6.54578	61.8038	0.610264	63.85	11.3304	90.7905	1.69063	41.8853	14.9453	19.0777	1
341200	2008	121.209	99.7754	36.4026	35.2291	2.21874	9.9288	3550.8	5.17111	40.9632	5.30681	43.4148	0.0124385	30.6	8.60879	80.4837	1.14333	53.0774	9.40146	9.86683	1
341200	2009	121.736	99.7476	36.8607	37.0091	2.27586	10.4933	4039.4	5.2217	41.2442	5.68448	48.9976	0.0557426	32.4	8.71193	81.5496	1.2717	54.9297	12.1253	10.2876	1
341200	2010	120.395	99.6447	37.3595	40.13	2.61622	9.27909	4528	5.28871	41.2082	6.03739	54.8195	0.136669	31.9	8.87258	84.0136	1.27365	56.4094	12.3496	10.3489	1
341200	2011	125.162	99.5518	37.8866	40.9827	2.59513	11.7945	5456.33	5.28609	41.8625	6.43257	61.1665	0.185652	33.3	9.0261	82.4074	1.52304	54.8472	12.2664	11.4094	1
341200	2012	123.753	99.3397	39.1998	43.8116	2.85982	12.7667	6384.67	5.24969	42.1743	6.76209	63.1537	0.216797	34.9	9.13309	82.2069	1.54335	54.5284	12.5007	12.1189	1
341200	2013	125.366	99.1136	40.6212	45.4611	3.14888	11.7069	7313	5.25649	42.2298	7.10551	66.3991	0.234983	36.2	9.21911	82.2027	1.3694	53.7094	13.2846	12.5235	1
341200	2014	127.69	98.9945	41.8034	46.6353	3.47078	12.8403	8213.13	5.46678	42.8722	7.48857	70.1059	0.249154	37.5	9.3333	81.6731	1.50601	54.172	12.8844	13.4201	1
341200	2015	127.45	99.0754	44.6249	49.4879	3.7544	14.7289	9001.45	5.70167	43.7778	7.77702	75.9572	0.293261	38.81	9.40558	82.3875	1.72793	53.7171	11.9555	14.5126	1
341200	2016	116.71	99.0088	45.8054	55.3222	4.07735	15.7251	9776	5.54988	43.9231	8.09493	78.425	0.218752	40.24	9.48799	91.2088	1.76636	49.2285	15.2396	14.931	1
341200	2017	118.413	99.0606	48.0251	56.7716	4.13455	16.545	10748	5.64604	44.5451	6.68903	84.0912	0.349752	41.75	9.59447	90.8992	1.75365	49.254	14.9389	15.8305	1
341200	2018	120.283	99.3013	49.6533	57.5511	4.15806	14.5928	11830	5.27557	44.3237	7.56155	80.4048	0.389767	43.29	9.70679	87.2113	1.77813	46.3912	14.673	16.0004	1
341200	2019	121.314	99.3816	51.4308	57.9792	4.16625	16.562	13079	5.40536	45.223	7.73246	91.6608	0.405132	44.62	10.1313	86.71	1.81786	44.6774	13.5355	17.2248	1
341200	2020	122.948	99.7852	52.6502	58.675	4.22583	13.9281	14256	5.37332	45.3192	7.93855	101.454	0.544142	41.97	10.169	85.8249	1.60447	43.1113	16.6751	17.4389	1
341200	2021	124.435	100.064	53.7244	57.971	4.25819	16.843	15874	5.4465	46.4553	8.18276	110.236	0.84112	42.74	10.2613	84.9223	1.99488	43.8391	15.3721	18.9556	1
341200	2022	124.697	100.242	54.7002	57.7871	4.22858	13.7266	16871	5.47961	46.3861	8.38963	116.579	1.02324	43.47	10.3114	84.5488	1.84226	43.9668	15.3901	18.9695	1
341200	2023	125.402	100.167	55.7127	57.4433	4.18746	17.1965	18232	5.50448	47.339	8.55029	122.15	1.09167	45.16	10.3392	84.1943	2.03676	45.7329	15.9834	20.412	1
341300	2008	100.944	99.6185	37.835	136.746	7.25144	12.3946	3671	4.78083	40.5947	6.66665	44.5808	0.0242544	13.14	9.00747	78.5416	1.37276	51.6139	10.7117	9.97758	1
341300	2009	101.867	99.8443	38.0987	138.812	7.88746	11.7126	4076	4.89048	40.7923	7.14928	42.9003	0.133431	33.2	9.0491	79.2517	1.41956	53.3167	12.8693	10.1456	1
341300	2010	102.625	99.8888	38.3991	142.309	8.0903	11.0928	4766	4.94315	40.959	7.62115	49.1807	0.145042	31.4	9.22349	79.7793	1.34475	53.8407	13.2137	10.4367	1
341300	2011	103.404	99.7771	36.1778	140.091	8.4546	12.8469	5720	5.03725	41.4184	7.91454	58.6589	0.159377	33.1	9.42239	80.0694	1.32987	54.4483	14.9766	11.1169	1
341300	2012	104.566	99.3844	39.7565	140.3	8.91806	13.1029	6635	4.6967	41.3378	8.26231	64.7838	0.194602	34.8	9.54963	80.5167	1.61538	55.2207	16.2548	11.766	1
341300	2013	105.727	99.1935	43.4616	132.936	9.14687	12.616	7571	4.704	41.6134	8.51254	66.5185	0.21413	36.2	9.66789	80.6169	1.63245	54.2655	14.9648	12.4648	1
341300	2014	108.734	99.2327	44.3486	132.668	9.26156	15.1926	8332.02	4.83347	42.4273	8.82336	72.2273	0.179607	37.4	9.78453	80.4318	1.65044	55.3562	14.8335	13.5188	1
341300	2015	111.256	99.402	45.2404	133.31	9.10802	13.3592	9140.2	4.97702	42.6384	9.13964	77.5282	0.199877	38.73	9.85362	79.819	1.55137	55.5601	14.9186	13.7642	1
341300	2016	111.663	99.4862	46.168	133.067	9.45755	13.6472	9917	4.83086	42.8012	9.42499	73.2887	0.232343	40.03	9.93643	80.4665	1.63672	52.3298	15.6568	14.2239	1
341300	2017	113.323	99.5825	46.9535	130.404	9.37717	16.3493	10859	4.87269	43.6102	8.00417	77.1055	0.236488	41.56	10.0148	80.408	1.81312	51.9674	14.0358	15.3216	1
341300	2018	112.473	99.5958	47.9036	132.428	9.52602	13.8594	11941	4.5632	43.2171	8.24071	77.1302	0.273423	42.74	10.1191	91.0138	1.72977	51.6912	12.5731	15.3101	1
341300	2019	112.871	99.6658	48.8873	134.662	9.26342	13.4939	13213	4.72056	43.7492	8.47547	88.5589	0.297527	43.96	10.3115	90.7432	1.66682	50.892	12.2528	16.0408	1
341300	2020	113.469	99.7297	49.2132	135.73	7.9757	15.6184	14369	4.79225	44.5661	8.77555	93.8169	0.325366	43.76	10.3428	90.3844	1.94167	48.6519	16.5127	17.0945	1
341300	2021	113.516	99.9639	53.5362	136.203	7.66024	14.8783	15913	4.85494	45.2424	9.00606	97.8675	0.409619	45.03	10.3997	89.9905	1.61461	47.0459	16.26	18.1196	1
341300	2022	114.046	100.182	48.4201	135.801	7.67973	17.2572	16897	4.87697	45.7431	9.34587	102.202	0.634941	46.38	10.4271	89.8718	2.12068	47.0986	15.5636	18.6659	1
341300	2023	114.301	100.146	43.3379	135.776	7.72008	15.1906	18282	4.89103	45.5347	9.65616	103.213	0.702004	48.09	10.4504	89.7222	1.6485	46.8912	15.7347	18.5586	1
341500	2008	108.198	99.637	47.0709	114.736	2.59934	9.2037	3647	6.5378	42.6471	6.46003	28.4795	0.0626977	16.21	8.93722	76.5347	1.09738	44.0897	12.0159	11.0745	1
341500	2009	109.59	99.558	47.4291	121.292	3.39119	12.9102	4010.3	6.67074	43.4204	7.01092	29.526	0.134283	36.9	9.02082	76.6524	1.44899	43.6563	15.7716	12.0705	1
341500	2010	111.654	99.5855	47.7426	129.353	3.73373	10.192	4713.6	6.66345	43.1923	7.54613	33.1255	0.15111	35.9	9.16877	77.0425	1.21396	44.5355	16.1888	11.9653	1
341500	2011	111.539	99.5387	23.4507	135.333	3.30056	13.9439	5643.4	6.77614	42.9639	7.80788	37.7042	0.184109	37.4	9.35619	78.9788	1.64947	45.0087	16.7684	11.1894	1
341500	2012	113.532	99.3605	48.722	140.046	3.30574	12.4738	6534.7	6.2713	43.6002	8.43327	41.2453	0.235878	38.9	9.46707	79.6207	1.36163	44.8803	16.8294	13.2301	1
341500	2013	114.294	99.0758	74.5311	148.571	3.68446	13.323	7430.4	6.17454	44.986	9.00148	42.1405	0.249953	40.2	9.5536	80.1871	1.50241	43.6249	17.1733	15.9241	1
341500	2014	116.759	98.8654	75.4908	134.047	3.3997	14.6907	8287.03	6.33877	45.5889	9.48948	46.7665	0.287658	41.4	9.62964	80.6453	1.71832	44.0583	15.8155	16.8037	1
341500	2015	86.7929	98.831	76.771	102.188	4.15281	12.1346	9196.94	6.45181	45.3738	7.03565	38.9981	0.195135	42.81	9.55836	76.3796	1.54929	44.7777	17.2955	16.4261	1
341500	2016	88.8189	98.9776	56.5881	96.871	4.57319	13.8495	9960	6.09255	44.5444	7.36392	76.498	0.259825	43.99	9.84576	76.4957	1.46835	42.3851	17.4369	15.3389	1
341500	2017	88.6139	99.293	58.3657	97.4038	4.6239	16.1375	10857	6.19074	45.4564	7.47859	85.7702	0.273325	45.41	9.8967	76.3952	1.82445	43.7407	17.5436	16.4185	1
341500	2018	96.4828	100.072	57.5615	89.4453	4.20527	14.2189	11959	5.69937	45.2859	7.7554	93.0825	0.28676	46.08	9.9928	83.875	1.6827	45.2604	17.7695	16.4641	1
341500	2019	96.7493	99.9719	58.0181	78.4753	3.31065	15.5206	13244	5.71304	45.8675	7.92098	106.339	0.301311	47.09	10.2187	83.2962	1.88521	44.4668	19.1901	17.3996	1
341500	2020	97.4284	99.9096	58.0945	79.8039	2.60928	15.2942	14449	5.67554	46.1223	8.18277	119.194	0.3678	48.49	10.255	82.9875	1.61325	43.9441	19.8897	17.9583	1
341500	2021	98.6123	100.083	58.1203	80.562	1.90327	15.8026	16003	5.80832	46.8623	8.37066	138.518	0.49061	49.46	10.4021	82.2278	1.8204	47.0404	19.3171	18.9215	1
341500	2022	98.085	100.861	57.332	82.0797	1.22679	16.1642	17216	5.8187	47.5615	8.51892	148.367	0.803445	50.5	10.4473	82.0528	1.90959	47.0923	18.6589	19.5497	1
341500	2023	94.9581	100.673	56.6589	86.0383	0.570893	16.1343	18696	5.92348	47.9524	8.63834	162.446	0.937156	51.41	10.4998	84.1244	1.85861	49.9381	17.0579	20.2204	1
341600	2008	117.111	100.011	53.1757	98.1095	3.33873	11.498	3849	5.09304	42.0258	7.20523	40.3023	0.00956964	31.4	8.83426	80.4973	1.35709	62.2324	9.47972	11.5943	1
341600	2009	117.711	99.9786	51.995	95.7195	3.32241	9.81203	4269	5.30872	42.0315	7.52714	43.7613	0.154594	33.1	8.8868	82.9798	1.07845	66.0732	13.937	11.4985	1
341600	2010	119.942	99.8928	51.7658	90.8672	3.00039	11.6961	5035	5.40937	42.6174	7.92001	49.8439	0.177168	29.1	9.05199	82.502	1.36428	66.6696	12.4791	12.3022	1
341600	2011	122.205	99.6031	33.6862	109.865	0.25701	10.1185	6055	5.43975	41.8053	8.45537	68.6309	0.166218	31.3	9.24683	82.1597	1.39711	65.1476	12.6778	11.0706	1
341600	2012	122.559	99.472	34.3079	108.194	0.478998	10.2163	7035	5.20262	41.7972	8.89553	76.1096	0.193775	33	9.36583	81.1704	1.23699	66.3262	12.7861	11.5212	1
341600	2013	124.22	99.352	34.9906	105.521	0.695512	14.9842	8006	5.23837	42.8236	9.37823	79.7061	0.204373	34.4	9.43345	80.9382	1.71712	65.0709	13.4208	13.0069	1
341600	2014	128.304	99.3605	35.4889	100.946	0.891914	13.3176	8967	5.32113	42.9465	9.94171	82.6973	0.205937	35.7	9.5417	81.1169	1.56697	65.0025	13.1228	13.321	1
341600	2015	130.215	99.5007	35.8894	98.1081	1.09536	12.4353	9738.16	5.47896	43.2572	10.3211	81.3336	0.231663	36.96	9.60545	80.9701	1.40599	63.9117	14.1622	13.6828	1
341600	2016	129.964	99.4756	36.4099	96.9466	1.3169	15.6255	10576	5.32329	43.8187	11.7949	84.2072	0.165394	38.28	9.69082	81.9875	1.73611	62.6673	14.9803	14.6704	1
341600	2017	132.132	99.4105	36.8804	94.0727	1.51437	11.344	11591	5.37068	43.4628	9.12622	85.3097	0.271251	39.77	9.77917	82.013	1.53904	63.0863	12.5987	14.4631	1
341600	2018	123.069	99.6088	37.7889	99.404	1.86013	12.984	12756	5.57231	44.2896	9.4339	90.1502	0.304915	41.01	9.87508	85.9821	1.47919	70.1822	12.0013	15.378	1
341600	2019	124.411	99.6306	38.6524	96.7175	2.07311	14.5192	14102	5.73144	45.1014	9.6477	97.0527	0.301641	42.22	10.1804	85.018	1.81379	68.4207	10.2662	16.5108	1
341600	2020	125.31	99.7457	0.474341	94.2989	2.28867	16.1557	15293	5.788	43.9245	9.88989	99.118	0.354965	42.5	10.2079	84.7156	1.94291	64.3285	14.0008	14.3159	1
341600	2021	125.181	100.004	13.9403	92.4216	2.51636	16.2678	16769	5.87941	45.174	10.0952	102.021	0.455217	43.2	10.2919	85.0397	2.01987	63.6034	15.2195	16.2323	1
341600	2022	125.004	100.165	27.3611	90.429	2.74112	18.7744	17872	5.90063	46.5871	10.2521	105.615	0.748247	44.05	10.3522	85.0391	1.90599	62.6379	15.3489	18.3753	1
341600	2023	124.869	100.102	40.7631	88.4628	2.96663	16.6093	19391	5.91559	47.2743	10.3242	104.437	0.752636	45.95	10.4029	85.0886	2.06226	62.4853	14.9007	19.832	1
341700	2008	86.6459	99.379	38.3615	119.573	1.45934	9.78047	4758	5.89693	41.74	4.20215	45.9834	0.00924206	40.5	9.40145	59.3125	1.21354	44.3218	10.243	10.3505	1
341700	2009	89.7591	99.5161	38.548	110.588	1.40013	13.0158	4955	5.91637	42.4117	4.5571	48.2607	0.0223165	42	9.63958	59.0677	1.36987	45.2441	13.6987	11.1424	1
341700	2010	92.0456	99.572	38.7323	106.744	1.5023	10.5822	5827	5.83661	42.2175	4.82355	56.2661	0.127282	44.5	9.83889	58.7781	1.36989	47.4354	12.6398	11.1356	1
341700	2011	93.3565	99.3986	34.6764	118.021	1.40515	13.1819	6908	6.0855	42.9117	5.12724	66.0242	0.16806	46	10.0467	57.0678	1.43186	46.33	13.004	11.9685	1
341700	2012	95.181	99.2078	39.8284	114.031	1.34473	10.66	7986	5.69635	42.5758	5.38934	73.2778	0.231281	47.5	10.1575	57.069	1.38014	45.8226	11.3824	12.2973	1
341700	2013	95.982	99.0071	45.1517	119.971	1.43106	11.0972	9156	5.62717	43.0532	5.7181	73.8187	0.290397	48.8	10.2595	57.389	1.38421	44.9288	11.1023	13.379	1
341700	2014	97.7956	98.9532	45.6293	125.823	1.31624	12.0058	10628.9	5.79237	43.7717	5.92364	63.8158	0.301874	50.1	10.3798	57.647	1.2754	45.082	9.90137	14.4337	1
341700	2015	97.3825	98.8144	51.368	130.209	1.26282	14.898	11511.2	5.94305	44.8351	6.09388	76.5955	0.297573	51.11	10.4255	59.2305	1.77805	40.0585	11.471	15.9552	1
341700	2016	94.8745	98.9726	52.4464	145.71	1.4753	14.773	12409	5.65973	44.8428	6.36389	72.5218	0.35164	52.3	10.5012	61.8229	1.88105	37.28	12.1474	16.298	1
341700	2017	91.1746	98.9478	54.9646	160.669	1.70392	13.6481	13476	5.76554	45.1309	6.35116	74.001	0.354982	53.67	10.5595	64.9395	1.75534	36.5891	13.2023	16.8125	1
341700	2018	82.5634	99.41	55.3059	174.554	1.77186	17.4535	14709	5.49193	45.9137	6.72837	85.841	0.422695	54.1	10.6521	71.3455	1.9218	39.8384	13.432	17.9163	1
341700	2019	82.4429	99.6877	55.8398	169.518	1.78001	17.4315	16099	5.51176	46.4375	7.01691	97.4729	0.49504	54.92	10.8466	71.4373	2.15237	39.0755	13.2123	18.6663	1
341700	2020	81.5882	100.169	55.7208	170.652	1.77724	16.7905	17323	5.33288	46.6596	7.0901	103.938	0.545108	59.68	10.8932	72.6893	1.99519	38.3119	13.919	19.0621	1
341700	2021	83.5169	100.511	55.4126	163.176	1.76907	16.3279	19168	5.41554	47.3	7.16002	117.229	0.619792	60.1	11.0407	71.9909	2.04654	37.9299	15.487	19.9528	1
341700	2022	82.7768	101.793	54.4124	160.673	1.72984	17.1199	20602	5.50166	48.3748	7.22061	124.735	0.679055	60.23	11.119	71.3691	2.20625	37.9401	14.6596	20.8011	1
341700	2023	83.7411	101.54	53.5631	155.38	1.661	16.6706	22415	5.54941	48.6939	7.31421	96.7733	0.823252	61.39	11.1525	69.6653	2.0895	37.3769	15.1944	21.5845	1
341800	2008	86.7206	98.5308	37.0912	38.255	3.21397	12.2628	5103	5.93609	41.787	4.75291	40.0956	0.00436606	17.9	9.6073	63.8119	1.27697	40.1734	10.9483	10.8835	1
341800	2009	91.3601	98.2131	38.0193	40.9279	3.19113	13.0586	5632	5.97767	42.037	5.10896	41.016	0.111422	43.2	9.65375	63.2636	1.45882	41.6578	13.6247	11.4642	1
341800	2010	93.8807	97.5577	39.2334	45.2623	3.59238	12.4106	5631.6	5.93094	41.6684	5.49543	49.547	0.128703	43.3	9.84616	63.9898	1.29124	47.6812	12.0357	11.4434	1
341800	2011	97.2783	97.2277	26.9159	48.0093	3.84867	12.6124	7752.3	5.98852	41.5912	5.84259	55.8917	0.140738	45	10.0871	64.4692	1.42306	48.0545	14.3533	11.6024	1
341800	2012	99.0295	97.7121	41.7598	50.8394	4.17044	11.6614	8930.3	5.66501	42.3296	6.24236	63.3066	0.18932	46.7	10.207	64.8066	1.43447	48.8582	13.5022	13.1251	1
341800	2013	100.874	98.0801	57.0691	45.0657	4.26451	13.3067	10126.9	5.53052	43.6663	6.59826	66.5691	0.204826	48.1	10.3116	65.1153	1.7352	48.1316	12.7046	15.2743	1
341800	2014	103.057	98.1623	58.1375	44.6469	5.30066	13.4859	11251	5.72416	44.2455	6.95119	76.1112	0.204605	49.3	10.3981	65.286	1.44735	47.9399	12.0233	16.0877	1
341800	2015	104.237	98.1543	59.213	45.5934	5.15238	14.2341	12308.6	5.91684	44.9055	7.25895	76.2012	0.233742	50.64	10.4545	65.8046	1.62636	46.9472	12.5595	16.9571	1
341800	2016	103.652	99.4787	59.5233	47.825	4.7564	13.5394	13379.4	5.61429	45.3413	7.46103	82.4487	0.267775	52.14	10.5395	67.0735	1.4372	45.6492	13.3926	17.2718	1
341800	2017	100.661	100.801	59.4415	46.5886	5.01085	14.8578	14590.3	5.76376	46.5404	6.76284	88.9589	0.242781	53.69	10.6535	67.5763	1.57965	46.1206	8.50975	18.1765	1
341800	2018	80.7742	101.719	58.5848	50.9832	8.39189	15.2419	16012.8	5.91169	47.1885	6.77993	89.3608	0.25812	55.21	10.7624	78.2423	1.8046	44.1671	6.72046	18.6467	1
341800	2019	80.5102	100.736	58.809	54.0729	5.99645	16.3861	17542.1	5.92989	47.4957	6.90216	100.842	0.250032	56.33	10.9322	77.6645	1.82034	43.6487	7.37022	19.6251	1
341800	2020	80.4703	100.621	58.4457	55.6894	5.76019	17.1698	18928	5.80947	47.8011	6.98084	107.456	0.340222	60.82	10.9666	77.3408	1.90028	42.6668	12.6852	20.3763	1
341800	2021	80.4409	101.509	60.971	52.1637	5.62073	15.6554	20565	5.85081	48.5355	7.06464	116.923	0.355664	61.75	11.1042	76.9023	1.98302	42.1291	15.7121	21.16	1
341800	2022	78.2502	102.891	52.0049	49.4016	5.55985	14.2674	22060	5.77972	48.7663	6.99675	122.648	0.471952	62.6	11.1469	76.6065	1.79866	41.3031	14.9589	20.8744	1
341800	2023	76.9873	101.647	44.0269	46.6829	5.50361	15.984	23979	5.84172	48.6937	7.00974	118.184	0.588514	63.55	11.1671	76.7907	2.02464	39.4337	14.7691	21.4751	1
350100	2008	201.85	98.1822	91.4703	1025.67	8.75856	17.0493	7142	5.22979	45.0717	12.0148	104.177	0.0698332	57.5	10.489	46.8224	1.92468	24.5279	4.72471	18.8818	1
350100	2009	203.447	99.3305	91.0543	1046.6	8.93247	17.6866	7669.06	5.21733	45.7533	12.5394	110.585	0.0818521	59	10.6169	45.5214	1.93626	25.7906	5.5356	19.2845	1
350100	2010	207.253	98.5223	91.3719	1072.83	8.55605	18.4865	8543.02	5.23249	45.8375	10.5202	132.002	0.102246	61.95	10.7864	44.3241	2.40671	25.9546	5.60497	19.9482	1
350100	2011	211.413	98.3567	91.833	1107.38	9.0915	17.5882	10107	5.29999	46.1246	10.8405	142.644	0.180531	63.3	10.9602	43.1037	2.15336	24.8404	8.01953	20.695	1
350100	2012	216.304	97.059	93.5178	1122.49	9.61543	20.0384	11492	5.23905	46.3535	11.4219	159.381	0.213461	64.79	11.0724	40.9931	2.37359	24.3796	7.27921	22.0077	1
350100	2013	226.837	96.2436	110.906	1123.33	10.2146	18.9099	12910	5.28233	47.1367	12.0688	170.123	0.250584	65.94	11.1757	39.9465	2.44441	23.9938	7.10078	24.1106	1
350100	2014	241.442	95.1297	114.002	1117.96	10.6885	22.5086	14012.1	5.34084	47.8116	12.9554	186.498	0.420627	66.94	11.2462	38.911	2.60368	25.2893	6.28848	25.8408	1
350100	2015	232.894	95.7746	110.458	1198.17	11.9353	20.8198	15203.1	5.34218	47.8265	13.756	198.855	0.460944	67.65	11.3244	35.2007	2.30496	29.5451	8.30206	25.6977	1
350100	2016	230.568	97.9882	109.001	1242.23	12.4666	23.3511	16346.5	5.33662	49.3217	14.0713	217.824	0.293329	68.53	11.4099	34.8621	2.72142	29.5167	7.48316	26.6476	1
350100	2017	233.293	99.6439	107.752	1132.94	12.8053	19.453	17865	5.41867	49.8521	11.6093	258.875	0.401644	69.5	11.5269	34.2789	2.47537	30.4697	9.73526	26.6971	1
350100	2018	238.285	100.53	107.585	1095.85	12.6691	25.7477	19418.9	5.51336	51.7572	11.2093	293.468	0.538133	70.33	11.6241	33.7075	2.94524	30.8145	8.10976	28.8057	1
350100	2019	241.74	102.023	105.598	1056.65	12.26	25.1229	21320.3	5.56125	52.7849	10.5499	330.997	0.748349	70.5	11.7927	32.9461	3.255	30.7793	6.85036	29.5975	1
350100	2020	241.856	102.651	107.593	1010.27	12.1279	21.8677	22669	5.62835	53.074	10.412	353.892	1.02096	72.5	11.8483	32.8219	2.75042	29.4468	6.49884	29.8714	1
350100	2021	243.809	101.335	79.0849	1004.62	11.9095	26.2531	25200.9	5.67406	52.5678	10.056	385.905	1.34392	73	11.9616	32.1597	2.97484	27.4038	6.67981	29.6373	1
350100	2022	244.086	102.391	78.1359	970.985	11.5527	25.6449	26826.2	5.69492	53.3411	9.91935	430.403	1.40585	73.27	12.0367	31.5002	3.07942	27.8502	5.72198	30.301	1
350100	2023	242.456	102.636	75.1234	936.1	11.1962	26.8041	28635.6	5.68454	53.9574	9.65844	467.637	1.28289	73.91	12.0774	31.1185	3.03728	28.5512	5.68651	31.152	1
350200	2008	80.5201	98.4412	96.1663	313.992	20.401	15.6793	8475	5.5202	44.7147	29.7865	51.5039	0.053529	81.2	11.4056	27.682	2.0093	36.3881	2.96657	17.7662	1
350200	2009	83.1739	97.7969	93.3731	286.045	19.2201	17.4487	9153	5.40856	44.7268	32.6015	56.4411	0.0842744	81.6	11.4942	28.8649	2.00676	39.6903	3.31584	18.1856	1
350200	2010	88.2998	95.7036	92.3827	289.801	20.6306	21.2775	10033	5.41788	44.6159	36.1761	66.4966	0.0472062	88.33	11.6467	27.2104	2.43842	41.5262	3.12722	19.3005	1
350200	2011	91.3654	94.9556	91.833	288.176	22.0439	18.2601	11928	5.5055	44.3477	40.6316	73.4604	0.0484393	88.5	11.828	26.6132	2.19282	43.1026	2.96813	19.7028	1
350200	2012	95.884	92.3626	93.5178	172.379	26.7003	18.5906	13455	5.5297	43.6715	46.8709	76.3997	0.0569301	88.6	11.902	26.4124	2.29155	45.17	2.98868	20.6805	1
350200	2013	104.577	89.7082	110.906	171.769	27.0688	21.4964	15008	5.57744	44.3608	53.8495	79.4634	0.0899998	88.74	11.9406	25.5976	2.49222	45.0099	2.76795	23.5347	1
350200	2014	115.723	87.8088	114.002	166.964	27.517	19.5002	16219.5	5.59536	43.7935	62.625	138.262	0.120892	88.8	11.9888	26.0787	2.38778	44.6924	2.70108	24.1612	1
350200	2015	128.162	89.4055	110.458	149.587	26.185	21.554	17557.5	5.66308	45.1769	71.232	137.339	0.132278	88.89	12.0085	25.5734	2.67771	45.4864	3.61658	25.2145	1
350200	2016	137.092	92.5928	109.001	136.256	22.6168	21.9408	18884.9	5.36049	46.75	69.6202	143.458	0.10106	89.01	12.0508	25.3956	2.53347	44.4522	2.78587	25.9314	1
350200	2017	120.319	93.9756	107.752	163.182	27.3748	20.2798	20460	5.83055	47.5816	68.2641	160.867	0.182984	89.1	12.1315	19.6069	2.35379	46.756	2.86989	26.2742	1
350200	2018	128.313	94.7794	107.585	172.667	26.9907	23.0699	22410	5.70373	48.7924	73.9281	188.408	0.295239	89.1	12.1919	18.6111	2.68231	47.8398	2.44751	27.8617	1
350200	2019	136.778	95.9829	105.598	133.14	25.7919	24.4773	24802	6.06783	50.5468	79.1913	231.77	0.385577	89.2	12.3445	18.1448	2.86458	45.6554	2.5782	29.5093	1
350200	2020	141.45	98.4908	107.593	128.21	24.7001	25.0942	26612	6.12861	52.406	82.9709	253.156	0.8257	89.41	12.3661	18.1697	3.18383	45.6826	2.57176	30.8735	1
350200	2021	138.963	99.5288	79.0849	129.814	24.5797	24.7626	29893.7	6.20561	52.335	84.3706	273.431	1.04364	90.1	12.4234	18.6279	3.17867	47.1769	2.14836	30.1265	1
350200	2022	133.233	102.073	78.1359	121.727	24.234	27.9863	32323	6.21715	54.4879	83.6445	296.589	1.18141	90.19	12.4924	19.2201	3.37461	49.2217	2.43098	31.8532	1
350200	2023	125.063	101.884	75.1234	110.039	24.3204	25.2824	34205.8	6.30387	54.3689	83.4293	313.538	1.70353	90.81	12.4906	20.0485	3.24538	51.8249	1.9699	31.9322	1
350300	2008	153.081	99.0535	90.2845	536.137	22.5598	16.1197	6431	5.68466	44.7026	10.8081	49.0464	0.141424	46.3	9.86597	50.6836	2.1927	29.2357	8.4325	17.6594	1
350300	2009	158.331	99.0984	90.6426	523.242	22.4363	17.3504	6915	5.61214	45.0255	10.9757	49.6851	0.143884	47.2	9.98199	51.2182	2.18736	30.4374	10.7861	18.2199	1
350300	2010	161.645	98.975	91.1133	517.987	22.6256	19.8325	7657	5.57783	45.5597	11.1083	56.0278	0.0935077	50.78	10.1766	50.3209	2.22827	30.4896	8.59925	19.1359	1
350300	2011	162.067	98.7066	91.833	523.576	23.2886	18.7443	9058	5.68818	45.7661	11.4506	60.1809	0.157488	50.9	10.379	49.0597	2.1052	28.9275	10.2892	19.7408	1
350300	2012	161.901	97.6913	93.5178	536.668	24.3	20.3879	10299	5.69204	45.9622	11.9873	63.6757	0.202703	51.8	10.5058	47.4703	2.26985	28.2237	9.90399	20.7813	1
350300	2013	169.334	96.6818	110.906	535.781	24.0965	20.8806	11586.9	5.71419	46.88	12.5614	67.4792	0.228735	53.6	10.6012	46.2499	2.40236	27.6103	10.9887	23.059	1
350300	2014	175.175	96.2753	114.002	541.753	24.147	20.441	12828.8	5.7497	47.1881	13.1351	71.2115	0.330702	55.3	10.6925	45.5137	2.69345	27.8237	9.97622	23.9558	1
350300	2015	185.908	96.6067	110.458	532.94	23.6808	19.0656	13881.7	5.73603	47.2921	13.6914	69.9765	0.439733	56.58	10.7806	43.5006	2.12912	27.1821	10.5203	24.1145	1
350300	2016	187.104	97.7166	109.001	546.584	23.9204	20.2973	15131.3	5.59944	48.0562	12.5519	71.2018	0.326707	58.1	10.8609	43.1296	2.58535	24.4498	8.75973	24.8391	1
350300	2017	153.556	98.4702	107.752	668.852	28.4772	24.2419	16492	5.73067	48.9738	12.0537	74.9091	0.364108	59.6	10.9555	51.4487	2.6769	22.7209	9.1548	25.6756	1
350300	2018	117.724	99.4704	107.585	880.57	35.2647	22.0491	17991	6.04452	49.172	11.7409	88.9941	0.39783	61.01	11.0395	45.8213	2.85189	23.4684	8.05402	25.5605	1
350300	2019	117.405	100.135	105.598	865.061	34.9028	24.3253	19687	6.07762	50.2085	11.6467	107.155	0.237878	61.7	11.1745	45.7321	2.84707	23.5972	10.7388	26.7049	1
350300	2020	119.888	100.607	107.593	818.551	27.3359	24.3084	20823	6.08893	51.1797	11.7453	117.879	0.251332	62.7	11.1891	44.9882	3.0826	23.8111	8.46176	27.5003	1
350300	2021	119.501	100.561	79.0849	806.018	19.8083	23.036	22891.9	6.1096	50.4843	11.7616	124.584	0.231952	63.5	11.2716	45	2.81342	22.609	6.74775	25.9532	1
350300	2022	118.02	102.972	78.1359	779.382	18.9993	25.0322	24717.5	6.09912	52.2598	11.5071	137.727	0.31221	64.01	11.3493	44.641	3.0858	22.7897	7.21263	27.2037	1
350300	2023	116.65	103.141	75.1234	751.583	18.1676	23.5195	26315.6	6.13141	52.4349	11.4056	147.093	0.382196	65.04	11.3329	43.975	2.87247	23.0027	6.94609	27.4659	1
350400	2008	258.717	99.9628	86.9972	66.1329	22.9873	14.8427	5853	5.36665	45.0074	6.77353	86.7335	0.0805069	43.31	10.114	49.3185	1.92282	51.6037	12.6097	18.5192	1
350400	2009	260.6	100.236	88.2169	67.9531	22.7008	20.5046	6327	5.42921	46.2854	7.23323	92.2778	0.11797	44.4	10.2929	46.985	2.39728	52.5539	14.4089	19.9975	1
350400	2010	263.482	99.1791	90.3838	69.6366	22.658	19.7093	6949	5.3988	45.9756	7.74504	103.913	0.311035	51.12	10.4844	45.1566	2.1854	52.3091	16.0271	20.3415	1
350400	2011	269.602	99.9865	91.833	69.7436	22.3437	19.5657	8205	5.46739	46.815	8.26125	115.1	0.324035	51.5	10.6993	43.0827	2.26536	50.1387	17.6793	21.22	1
350400	2012	271.527	99.735	93.5178	71.2966	22.6223	22.8053	9375	5.53776	47.6811	8.82539	122.603	0.403246	52.1	10.7964	40.5227	2.57308	49.7943	17.082	22.6156	1
350400	2013	283.416	98.6154	110.906	71.0555	22.2914	19.8987	10530	5.59383	48.0534	9.88476	129.726	0.482626	53.63	10.8791	38.5245	2.12983	48.5894	18.2229	24.2715	1
350400	2014	294.06	97.9486	114.002	71.9105	22.5635	22.2836	11665.2	5.66634	48.7298	10.762	139.556	0.508136	55.1	10.9523	37.1037	2.57755	48.7919	19.035	25.7407	1
350400	2015	296.796	101.376	110.458	70.53	22.2063	21.8261	12805.9	5.59348	50.1727	10.9471	145.459	0.548809	56.27	11.007	35.7199	2.41443	49.4193	18.8755	26.0402	1
350400	2016	286.736	105.228	109.001	69.6284	21.9887	19.7382	13918.2	5.61837	51.6443	8.29604	160.016	0.681312	57.5	11.0796	33.8692	2.31929	56.2184	16.76	26.0302	1
350400	2017	223.569	105.459	107.752	85.3526	26.7148	24.7379	15212.2	5.6908	52.2594	8.67046	175.916	0.655731	59.04	11.2005	42.287	2.89337	56.1184	15.4215	26.4914	1
350400	2018	169.906	103.142	107.585	108.14	33.256	20.4021	16601	5.85075	50.4894	8.51264	199.327	0.674651	60.23	11.3077	54.4441	2.43429	56.2041	15.5852	25.4511	1
350400	2019	172.598	100.573	105.598	106.22	32.8447	23.21	18312	5.85547	50.2529	8.53724	219.086	0.64228	60.9	11.4079	53.0869	2.72716	53.9918	15.0931	26.6512	1
350400	2020	175.115	99.8697	107.593	104.889	15.812	23.8827	19533	5.85879	51.2749	8.67549	230.582	0.679533	63.2	11.4491	53.1727	2.55795	53.1673	15.1259	27.5907	1
350400	2021	178.633	99.8914	79.0849	103.653	15.3913	23.2908	21617.1	5.89923	50.4392	8.85272	248.046	0.769588	63.7	11.5414	52.1973	2.92282	54.3884	12.4986	26.2517	1
350400	2022	174.439	105.412	78.1359	101.348	14.7197	23.8966	23228	5.90233	53.2215	8.55383	274.786	0.913463	64.4	11.5967	50.7773	2.63273	56.522	12.7627	27.1784	1
350400	2023	170.653	105.061	75.1234	99.2413	14.0953	23.7796	24822.4	5.91313	53.3449	8.28829	300.846	1.01667	65.9	11.5655	49.5667	2.98417	57.7994	13.3177	27.6374	1
350500	2008	187.133	98.0757	89.3745	376.683	4.79927	15.8487	7973	4.66614	44.6069	7.79961	40.1396	0.0376001	50.21	10.5946	63.4368	2.05091	31.9031	7.88552	18.3875	1
350500	2009	195.349	97.8593	89.1391	366.587	4.74842	18.2447	8563	4.45885	44.8767	8.53127	43.1179	0.0287222	52.3	10.7163	63.5411	1.84932	34.5973	9.83073	19.1521	1
350500	2010	201.552	96.099	90.4782	367.564	4.83997	18.5055	9296	4.29146	44.3004	9.42772	51.0726	0.036749	58.43	10.8594	62.5518	1.99289	35.48	9.20635	19.6554	1
350500	2011	206.383	96.0426	91.833	371.549	4.97315	19.3907	10578	4.22474	44.7721	10.469	58.7746	0.182859	59.3	11.034	61.3487	2.30407	34.627	10.159	20.6242	1
350500	2012	209.565	95.6606	93.5178	375.487	5.2263	20.7977	11915	4.02259	45.0624	11.6603	63.4523	0.207033	60.4	11.13	60.1434	2.49603	35.8091	11.3288	21.6459	1
350500	2013	221.176	95.154	110.906	362.506	5.28978	20.1131	13316	3.90557	45.9063	12.6297	68.4967	0.254201	61.6	11.2141	59.2846	2.34747	36.5723	11.1157	23.7763	1
350500	2014	235.785	94.0148	114.002	355.732	5.40002	21.5143	14586	3.75484	46.0667	13.7183	72.9287	0.343401	62.9	11.2904	58.4724	2.39912	38.4807	10.1392	25.0758	1
350500	2015	258.3	95.3099	110.458	336.283	6.38008	20.2489	15860.7	3.59558	46.508	14.6371	75.1305	0.343588	63.56	11.3499	54.9653	2.53339	38.7408	11.6292	25.5224	1
350500	2016	261.51	97.8488	109.001	307.955	9.63097	22.8273	17178.6	3.37053	47.8917	13.5374	80.4302	0.332417	64.5	11.4192	53.9382	2.81708	38.3891	9.67856	26.5663	1
350500	2017	211.971	99.0125	107.752	378.227	12.0787	23.7378	18606.4	3.49496	48.5198	12.5985	87.6678	0.360982	65.69	11.5313	66.6683	2.80794	37.7974	9.44594	26.6021	1
350500	2018	159.694	100.081	107.585	497.921	15.9743	21.7127	20276.8	5.67889	50.8265	12.9211	101.406	0.371281	66.6	11.6277	55.5295	2.58271	39.2007	9.97479	27.2101	1
350500	2019	166.507	99.5691	105.598	469.569	13.4895	19.9476	22142	5.70349	50.9175	13.3424	115.734	0.377372	67.2	11.7807	53.7763	2.48119	39.0774	9.92155	27.7594	1
350500	2020	169.874	100.233	107.593	457.064	12.5299	20.596	23459	5.73507	51.8401	13.7362	125.011	0.406142	68.5	11.7953	53.2121	2.65727	38.4551	9.37481	28.796	1
350500	2021	170.845	100.589	79.0849	472.503	12.6037	22.0024	25910.6	5.79915	51.5361	13.8208	136.272	0.472645	69.7	11.8956	52.6364	2.77317	38.8697	7.39256	27.996	1
350500	2022	167.471	103.453	78.1359	459.176	11.8613	25.2089	27571.6	5.80501	53.6466	13.519	153.047	0.522648	70.04	11.96	52.2803	2.88803	39.1311	7.68873	29.3815	1
350500	2023	163.451	103.512	75.1234	447.823	11.1794	22.4642	29595.5	5.82923	53.6577	13.2722	169.779	0.642253	70.79	11.9622	51.814	2.83137	39.5831	7.24365	29.5716	1
350600	2008	200.862	100.086	98.9011	1593.81	10.3236	16.179	6506	5.74618	46.2488	15.1901	42.6206	0.0335767	41.99	9.97057	44.463	2.03179	43.8792	6.5925	19.2858	1
350600	2009	201.315	100.92	95.8413	1586.09	10.2065	19.3539	7054	5.82275	47.1816	15.1638	43.1797	0.0433071	43.3	10.1254	46.2197	2.0649	45.5894	11.6924	19.9758	1
350600	2010	203.654	100.318	93.3858	1580.07	11.2177	20.7212	7861	5.88156	47.2705	15.5127	50.0776	0.159208	46.73	10.3101	46.0893	2.3279	46.2527	10.8847	20.4856	1
350600	2011	203.967	99.3482	91.833	1601.06	11.6627	18.4818	9128	5.98922	46.8603	16.1513	54.7868	0.105698	47.9	10.5159	45.7917	2.35874	44.4083	13.5215	20.5958	1
350600	2012	213.685	95.8828	93.5178	1606.41	11.9974	16.8397	10389	5.9962	45.622	17.1442	58.6544	0.255869	52	10.6411	45.3462	2.03931	44.3599	13.3656	21.1251	1
350600	2013	226.669	94.8699	110.906	1603.56	12.6908	19.6981	11639	5.96445	46.8391	18.5987	62.5011	0.335693	53	10.7294	44.6641	2.40966	44.2069	16.0941	23.8993	1
350600	2014	240.502	95.5712	114.002	1589.95	12.6024	22.2706	12690.1	6.03932	48.1364	19.4514	66.4317	0.371863	53.8	10.8275	43.4087	2.41198	46.0767	13.3478	25.4553	1
350600	2015	248.246	98.0013	110.458	1594.25	12.8857	24.6822	13866	6.11238	49.7783	19.9002	69.3657	0.405227	54.76	10.9172	42.4137	2.64644	45.779	14.7439	26.4404	1
350600	2016	244.536	100.752	109.001	1620.73	12.5491	20.2445	15320	6.1176	50.5295	17.2262	75.9068	0.351673	56.2	11.0272	41.4665	2.55834	44.3006	13.2047	26.2238	1
350600	2017	196.05	102.558	107.752	2010.89	16.5396	20.346	16675.6	6.29722	51.1964	16.9154	82.3501	0.373616	57.7	11.139	49.6187	2.72464	43.5274	10.0717	26.129	1
350600	2018	148.706	103.333	107.585	2480.34	21.0317	25.4356	18185.5	6.65081	52.4578	16.2958	94.6349	0.496588	59	11.2355	36.3892	2.83128	43.0867	9.42741	27.2164	1
350600	2019	148.17	101.397	105.598	2398.57	19.7668	26.4204	19884.9	6.73344	52.3151	16.3721	106.951	0.523616	60	11.4169	35.1706	2.84539	42.4605	9.7729	28.0664	1
350600	2020	148.456	101.394	107.593	2200.3	19.5317	24.7344	21103.3	6.71333	52.5048	16.3488	118.941	0.594417	61.4	11.3709	35.0885	3.14451	41.5114	9.69835	28.5174	1
350600	2021	147.496	101.628	79.0849	2113.09	19.836	23.0505	23582	6.78503	51.6814	16.2121	133.755	0.77761	62.9	11.4672	34.8077	2.73592	40.5348	5.99784	27.1139	1
350600	2022	143.549	104.266	78.1359	1922.44	19.7536	25.7194	25789	6.78966	53.7644	15.8984	161.002	0.890133	63.34	11.5926	34.4908	2.71854	41.2629	7.1107	28.6546	1
350600	2023	140.616	103.418	75.1234	1739.84	19.7029	23.5343	27787.6	6.78946	53.4728	15.5284	177.21	1.1363	64.2	11.5892	34.1293	2.79334	41.626	7.32772	28.92	1
350700	2008	199.196	98.4276	87.7075	109.324	7.96624	14.6633	5712	5.27065	44.5255	6.74778	55.2675	0.0563752	46.3	9.80623	58.6371	1.91185	42.5586	12.0169	17.3916	1
350700	2009	205.487	99.3508	89.5632	105.563	8.38045	15.9265	6116	5.37107	45.4329	7.22904	58.6812	0.147717	48.5	9.90583	58.7382	1.80698	43.8801	13.1586	18.1644	1
350700	2010	205.291	99.7714	91.054	104.796	9.0173	17.4206	6759	5.02588	45.6924	7.79255	65.4764	0.157139	50.74	10.0525	59.1079	1.99682	43.9108	15.0918	18.7373	1
350700	2011	205.539	100.552	91.833	102.992	9.56255	18.7592	7861	5.01783	46.5242	8.35495	87.4331	0.235569	51.1	10.2589	58.3503	2.09896	43.4617	14.7321	19.6277	1
350700	2012	207.513	99.5655	93.5178	107.348	9.85254	20.8275	8893	4.89199	46.6569	9.15538	93.6476	0.262371	51.6	10.3658	57.7104	2.21184	43.1914	14.7707	20.6206	1
350700	2013	211.368	99.5756	110.906	109.012	10.3149	21.2794	10090	4.81948	47.8169	10.0808	97.632	0.313657	52.6	10.4629	57.1651	2.34158	41.5616	17.9345	22.7681	1
350700	2014	216.111	97.794	114.002	103.969	10.4697	19.901	11251.5	4.7126	47.2243	10.8341	101.766	0.351215	53.4	10.5614	57.018	2.28502	41.0602	19.8584	23.3233	1
350700	2015	219.539	98.7211	110.458	92.8122	10.5793	22.1725	12264	4.53794	47.8985	11.4749	101.607	0.383127	53.98	10.6425	56.9671	2.9113	38.5555	20.0297	23.9693	1
350700	2016	218.35	100.388	109.001	99.6578	10.5728	21.9646	13331	4.48474	48.7058	11.6062	109.743	0.414705	54.8	10.7235	56.655	2.81924	36.7352	17.6159	24.3447	1
350700	2017	179.582	102.038	107.752	77.7074	12.3311	21.527	14558	4.55675	49.3397	10.6785	114.03	0.415245	55.79	10.8385	68.7792	2.43674	36.9104	16.976	24.1966	1
350700	2018	142.12	102.149	107.585	99.1755	15.1153	24.5406	15868	6.23888	51.5876	10.918	127.85	0.442497	56.7	10.9334	64.9009	2.78906	38.2534	16.1146	25.5672	1
350700	2019	138.939	101.457	105.598	102.142	15.3789	22.556	17385	6.28692	51.3061	10.8836	139.93	0.512946	57.5	11.0452	62.6864	2.7442	37.2947	15.2864	25.736	1
350700	2020	139.72	101.671	107.593	100.9	14.8783	25.9067	18557	6.29011	52.3577	10.9735	147.834	0.605175	59.65	11.0574	62.3598	3.00974	36.407	15.7623	27.1417	1
350700	2021	138.33	102.115	79.0849	100.19	14.7232	24.487	20431	6.31506	51.4529	10.8506	161.142	0.669171	60	11.116	61.6887	3.27219	36.768	14.2067	25.4623	1
350700	2022	131.542	106.992	78.1359	99.9081	15.2026	21.278	21781.6	6.32115	53.2328	10.5058	181.688	0.667504	60.84	11.1626	60.6713	2.59844	38.6925	15.698	25.4756	1
350700	2023	126.256	105.89	75.1234	99.4172	15.6778	25.0009	23326.6	6.32156	53.5627	10.1981	202.191	0.775162	62.28	11.1912	59.858	3.34087	39.7086	15.2322	26.5848	1
350800	2008	207.028	99.9176	88.1201	51.5222	10.8139	19.4384	5775	5.25485	45.8528	6.96237	56.9642	0.099272	40.51	10.0475	58.5499	2.31955	35.0572	10.3161	18.5254	1
350800	2009	211.979	99.9806	89.0667	51.2157	11.0768	16.9357	6251.62	5.11575	45.5306	7.31606	58.5138	0.278219	42.3	10.2442	58.8223	2.17032	37.3171	10.5474	18.3877	1
350800	2010	217.107	99.2146	90.7086	51.9896	11.406	19.1127	6931	4.98693	45.6938	7.62356	68.6013	0.30513	45.02	10.3584	59.2613	2.26819	38.5312	11.7574	19.2794	1
350800	2011	221.17	99.7958	91.833	52.0213	11.7164	19.0337	8234	5.03288	46.3804	7.96082	76.3443	0.378274	47.5	10.6476	59.431	2.28439	36.116	11.9753	20.1148	1
350800	2012	224.957	99.2023	93.5178	51.2457	12.1043	21.7703	9396	4.94084	46.8599	8.1334	85.6675	0.49444	49.4	10.7402	59.3731	2.36473	37.8798	12.1514	21.3566	1
350800	2013	230.549	98.737	110.906	50.7084	12.5575	22.3714	10842.1	4.86833	47.9224	8.63398	95.8281	0.591779	50.89	10.7977	59.1281	2.32503	38.5508	15.2101	23.673	1
350800	2014	238.135	97.7535	114.002	48.475	12.8676	20.1122	12054.4	4.79678	47.5851	9.10855	104.17	0.696266	51.6	10.8741	58.7304	2.36923	39.4257	14.5015	24.1736	1
350800	2015	240.72	99.0883	110.458	48.7882	13.3124	21.9414	13274	4.66283	48.4335	9.09004	104.754	0.762895	52.57	10.9365	58.5509	2.74648	37.7111	17.4784	24.8553	1
350800	2016	236.328	102.192	109.001	48.6675	13.7664	19.0135	14429	4.5187	49.3006	7.45864	112.477	0.751368	53.8	11.0083	58.2193	2.38863	36.863	14.6429	24.7026	1
350800	2017	191.017	103.029	107.752	56.6359	16.899	20.9982	15697.8	4.60281	49.8884	6.82398	125.317	0.857314	55.7	11.1253	68.3341	2.70333	36.7883	14.5522	24.9054	1
350800	2018	149.128	102.364	107.585	70.4424	20.8747	21.8209	17154	6.42432	51.5723	6.76945	137.673	0.925053	57	11.2256	61.3153	2.78011	36.7422	14.9657	25.9028	1
350800	2019	149.226	101.115	105.598	68.6854	20.3727	24.5585	18859	6.4469	51.8799	6.91303	152.377	0.885877	58	11.3415	59.4075	2.7412	33.176	14.3293	27.0879	1
350800	2020	151.561	101.143	107.593	63.7186	16.3024	25.8793	20150	6.45966	52.7488	7.03031	161.052	0.959713	62.9	11.4123	58.7189	3.01366	30.255	14.3098	28.1972	1
350800	2021	152.544	101.077	79.0849	62.3551	15.6956	22.9712	22715.6	6.51695	51.6486	7.05301	172.85	1.17444	63.6	11.4848	57.7549	2.92139	33.5141	10.6933	26.6234	1
350800	2022	147.817	105.13	78.1359	61.1666	15.5712	23.4077	24407.5	6.51775	53.7824	6.93868	189.414	1.30303	64.15	11.5605	56.8989	2.88723	34.9476	10.8207	27.5072	1
350800	2023	143.943	104.473	75.1234	60.0815	13.4911	23.4534	26055.7	6.5274	53.8819	6.84547	204.689	1.26206	65.44	11.5607	56.2355	2.9827	35.5256	11.4755	28.0144	1
350900	2008	250.917	96.6319	116.171	313.671	7.5018	15.8365	5404.19	4.58238	44.8415	11.9115	84.9143	0.0315893	46	9.69262	59.7455	1.96181	44.9342	9.48628	20.3037	1
350900	2009	265.81	96.4555	121.389	326.42	8.1528	16.8835	5838.46	4.48494	45.26	12.7747	90.5019	0.0513797	47	9.81057	59.1536	2.07658	44.4233	13.2061	21.3491	1
350900	2010	276.23	98.0705	126.064	339.363	8.79544	17.3699	6542.4	4.28095	46.2422	13.3462	107.452	0.0755005	47.92	9.98802	59.0889	2.05244	46.3577	13.9826	22.3027	1
350900	2011	274.931	102.242	132.613	352.237	9.42531	18.8442	7755.97	4.22965	48.7566	13.4675	124.041	0.259878	49.2	10.2167	59.0048	2.2181	44.402	14.3236	23.7976	1
350900	2012	267.21	103.062	128.673	370.362	10.1903	18.4673	8828.7	4.0606	48.8641	13.3045	145.288	0.327253	50.6	10.3573	57.157	2.1553	43.8491	13.7266	23.7505	1
350900	2013	267.874	103.04	124.877	380.58	10.8078	21.3613	10121.4	3.92753	49.2993	13.3001	157.318	0.324283	51.8	10.4823	55.6827	2.49394	43.3736	15.9605	24.5796	1
350900	2014	268.719	100.598	126.516	393.407	11.4031	20.2065	11301.9	3.82067	48.3513	13.6994	169.519	0.369103	52.9	10.5731	54.617	2.38754	43.7875	16.6531	24.9821	1
350900	2015	267.899	100.041	133.872	401.869	11.9618	20.1762	12391	3.68036	48.5771	13.6978	172.917	0.346694	53.55	10.6603	53.7158	2.60193	43.1709	16.786	26.0312	1
350900	2016	259.897	102.103	131.57	411.544	12.518	19.733	13515.8	3.52964	49.3143	13.5443	185.903	0.328491	54.4	10.7388	52.8562	2.74277	41.2696	15.0338	26.1711	1
350900	2017	210.089	104.167	126.889	483.256	15.3648	22.689	14721.5	3.60625	50.3446	12.6228	204.221	0.431433	55.7	10.8356	63.4307	2.5155	40.2887	15.2885	26.1981	1
350900	2018	163.071	104.665	121.962	600.927	19.0898	23.2672	16147	5.27444	52.0286	12.379	226.584	0.464028	56.7	10.9129	54.3431	2.6359	40.1174	15.6353	26.615	1
350900	2019	162.949	102.736	114.896	586.79	18.6569	23.4886	17804	5.25579	51.3535	12.3886	249.183	0.652669	57.6	11.1401	53.0778	2.60666	40.135	14.9103	26.8394	1
350900	2020	160.895	102.607	116.61	566.568	15.3566	23.0998	19050	5.26644	51.801	12.4592	263.188	0.801974	61	11.206	52.6069	3.05143	39.4084	13.3539	27.4994	1
350900	2021	159.651	101.914	114.476	561.485	14.9969	24.0832	21281.8	5.30635	52.2	12.3729	281.901	0.863577	62.2	11.3909	52.1545	2.8774	37.2129	12.4554	28.6047	1
350900	2022	153.281	105.068	84.5409	537.72	15.0161	23.3184	23101.6	5.34504	52.4257	11.9168	312.153	0.961157	62.87	11.5143	51.7362	3.1753	37.5163	10.8693	26.9023	1
350900	2023	149.138	104.923	57.3062	520.845	13.0211	24.5887	24819.5	5.30255	51.7183	11.5418	338.474	1.15131	63.96	11.582	51.0953	2.9378	38.1063	11.1594	25.6659	1
360100	2008	106.04	100.45	37.7796	65.0714	2.24274	9.78669	5773.67	6.24427	42.8921	6.34718	42.3789	0.0197953	50.52	10.421	67.3904	1.16787	38.0682	9.18284	11.3317	2
360100	2009	106.86	100.255	37.8003	65.2943	2.17359	11.0276	6296.19	6.30124	43.2117	6.95525	45.965	0.0779115	85.79	10.5172	67.3473	1.20044	38.0469	8.26769	11.8649	2
360100	2010	105.339	100.053	38.1559	68.3736	2.21695	13.5864	7193.25	4.96252	42.3667	7.64858	48.9531	0.170096	65.71	10.6875	68.4898	1.55256	37.0635	7.72551	12.1668	2
360100	2011	106.684	99.9476	37.3707	70.2173	2.25505	12.7858	8483.66	6.38568	43.9956	8.46019	53.9226	0.172896	67.24	10.8827	68.7997	1.43045	37.2328	7.16258	13.2843	2
360100	2012	107.842	99.7123	37.2563	72.4392	2.29431	13.3844	9730.43	6.54138	44.4814	9.32529	59.0464	0.195815	68.78	10.9866	68.5314	1.49764	37.3006	7.45131	14.0978	2
360100	2013	109.045	99.6755	37.1547	73.6232	2.34392	14.2829	11186	6.64948	45.1028	4.28995	62.6104	0.210407	69.83	11.0883	67.5526	1.46842	36.9452	7.39047	15.0575	2
360100	2014	107.886	99.2852	37.8913	75.4321	2.31184	11.1022	12414	5.99684	44.1072	4.54539	68.1999	0.261344	70.86	11.1683	68.5177	1.26592	36.8233	7.49954	14.7931	2
360100	2015	107.412	98.6307	38.4173	76.4671	2.29939	15.3672	13692.6	6.13219	45.0048	4.86828	74.9884	0.279689	71.56	11.2498	68.433	1.73377	38.9228	6.9919	16.3207	2
360100	2016	106.986	98.555	39.1415	78.0243	2.31348	14.0419	14952.4	6.20726	45.2055	4.81157	85.2339	0.160406	72.29	11.3298	68.8728	1.57405	41.4741	5.95052	16.7854	2
360100	2017	104.496	98.7476	39.6379	81.4603	2.39065	15.372	16364.1	6.13979	45.7984	5.11969	92.5412	0.176289	73.32	11.4264	70.7799	1.63445	43.6654	6.17456	17.7156	2
360100	2018	102.828	98.8641	40.0996	82.8129	2.05873	15.3431	17866.4	6.15627	46.2803	5.41831	102.55	0.250232	74.23	11.5044	71.5817	1.8438	44.1543	5.7124	18.4825	2
360100	2019	98.9405	99.1706	40.4563	86.2001	2.05417	12.5562	19497.6	6.43311	46.68	5.7197	108.664	0.278039	75.16	11.556	70.7908	1.50338	40.9742	5.65634	18.873	2
360100	2020	103.787	99.423	40.6997	82.9986	1.97993	12.9494	20920.9	6.14182	46.9621	5.98967	116.366	0.367634	78.08	11.5787	71.1867	1.74401	38.499	7.42298	19.6313	2
360100	2021	103.405	100.253	40.6098	80.8599	1.88508	17.0491	22912.6	6.21973	48.5552	6.19064	126.275	0.446451	78.64	11.7213	71.2903	1.87996	40.6791	7.3014	21.4493	2
360100	2022	101.215	102.111	43.4772	77.6756	1.91914	15.9304	24217.7	6.09967	49.4953	6.20959	135.151	0.778387	78.92	11.7938	71.3909	1.93393	40.9707	6.88513	22.0847	2
360100	2023	99.8672	101.346	42.7386	76.6855	1.9523	17.407	25802.7	6.23471	49.9201	6.3671	138.35	0.825877	79.5788	11.7894	71.2547	1.91942	42.4929	7.77581	23.1154	2
360200	2008	125.924	99.5117	44.7898	46.5711	3.82436	11.5737	5253	5.95433	42.7409	9.97717	78.6174	0.0161193	40.03	9.92077	61.0241	1.45226	53.9893	10.6294	12.1594	2
360200	2009	128.805	99.4839	45.0306	48.7714	4.0868	10.6914	5705	6.14029	42.9218	11.4999	86.6321	0.0162873	68.06	10.031	60.6172	1.185	54.8344	10.8213	12.3733	2
360200	2010	132.322	99.2811	45.3567	50.7661	4.32916	11.8877	6748	6.16151	43.348	13.0602	101.405	0.0445407	56.31	10.2501	59.9794	1.43468	56.7035	9.08461	13.2117	2
360200	2011	133.155	99.6231	44.7177	53.579	4.63971	12.6196	7943	6.2655	43.9879	14.5922	104.469	0.0881385	57.96	10.4431	59.9513	1.58905	53.4676	10.4818	13.9674	2
360200	2012	133.531	100.115	43.6609	56.295	4.94144	13.8417	9175	6.43764	44.8255	16.0564	111.323	0.14173	59.85	10.5371	59.8226	1.64455	54.1188	10.9645	14.8285	2
360200	2013	133.516	100.407	42.4823	59.7415	4.98867	11.9679	10363	6.60916	45.0842	6.13765	117.018	0.173834	61.05	10.6191	59.6949	1.4324	53.2777	11.1508	15.0592	2
360200	2014	138.748	99.0431	44.0239	56.5423	5.11397	10.5467	11547.5	6.62455	44.722	6.62887	122.003	0.149203	62.28	10.6918	58.6658	1.34017	53.9712	12.4661	15.5671	2
360200	2015	141.524	98.9288	45.1244	55.9516	5.24805	13.2303	12736.3	6.66876	45.5196	7.13726	128.981	0.161387	63.53	10.743	58.3767	1.50376	54.7036	14.1354	16.8246	2
360200	2016	143.669	100.436	44.9284	53.3591	5.23042	11.7713	13877.5	6.67182	46.2274	7.08096	135.057	0.159048	64.79	10.814	58.2458	1.46031	57.1354	10.9676	17.1826	2
360200	2017	142.631	101.52	44.4342	56.9616	5.3238	13.4528	15094.6	6.11816	46.647	6.95003	163.018	0.172214	65.95	10.8179	57.2671	1.71583	62.7839	7.14516	17.8212	2
360200	2018	142.704	101.188	43.9127	59.1236	5.14966	14.4421	16510.2	6.2559	47.1623	6.84383	175.607	0.250714	66.94	10.8158	57.2958	1.69434	63.4728	6.79352	18.7302	2
360200	2019	143.973	100.798	43.5649	56.8725	4.98422	14.6304	17984.5	6.25769	47.4174	7.15115	190.188	0.344771	68.05	10.8996	57.3421	1.62928	61.4605	6.69249	19.4861	2
360200	2020	140.112	101.097	43.0924	57.949	5.08809	14.9757	19297.4	6.57101	48.2165	7.42788	210.656	0.389644	65.02	10.9325	56.1482	1.715	59.0253	8.07811	20.2594	2
360200	2021	138.255	101.766	42.1016	58.0166	5.12238	14.8967	20995.6	5.83211	48.0929	7.62444	226.865	0.75621	65.94	11.0736	55.9499	1.94508	59.3791	8.46412	20.6521	2
360200	2022	134.957	103.758	40.8108	57.475	5.14318	14.0941	22331.4	5.71055	48.9361	8.1091	243.677	0.686137	66.48	11.1462	55.2934	1.77764	59.3702	8.15391	21.0044	2
360200	2023	131.845	102.783	39.7058	56.3157	4.98227	15.2093	23863.4	5.87577	49.2139	7.94668	255.053	1.03197	67.51	11.1507	55.0658	1.9859	61.0693	9.44225	21.8887	2
360300	2008	143.873	99.2517	42.837	43.9766	3.63842	11.835	5872	6.78295	43.7338	12.2259	47.2768	0.0519889	31.16	9.9459	62.0596	1.46514	38.9417	10.2846	13.0429	2
360300	2009	150.12	98.6546	42.8357	43.6693	3.67163	12.0975	6344	6.8155	43.7224	14.5292	57.7944	0.098622	60.39	10.0234	60.9766	1.2793	38.5396	10.6727	13.4326	2
360300	2010	155.178	98.4018	43.5314	43.864	3.74439	11.0847	7219	6.73504	43.6656	16.5807	66.0075	0.120525	59.17	10.228	61.2105	1.17774	38.3161	9.0631	13.7763	2
360300	2011	159.024	97.4351	41.4921	44.863	3.88494	11.6287	8598	6.83717	43.7358	18.6373	70.8447	0.170279	60.77	10.4512	61.8294	1.34653	36.6796	9.34909	14.4868	2
360300	2012	174.86	96.8815	46.6716	42.9893	3.7735	11.1857	9999.5	6.90853	44.2358	21.0418	73.5539	0.214324	62.31	10.548	58.4992	1.22272	37.3669	9.65053	15.8161	2
360300	2013	182.232	97.0008	52.0776	43.7708	3.65504	11.9744	11487	6.97878	45.188	10.5659	76.9317	0.255992	63.45	10.6271	58.323	1.43018	37.0237	9.63017	17.3155	2
360300	2014	191.253	95.9975	56.6647	41.0196	3.71002	11.661	12769	6.99963	45.3567	10.5963	82.2641	0.317768	64.61	10.6837	56.8688	1.41164	37.6032	10.9536	18.4093	2
360300	2015	201.272	96.1029	58.9625	39.3421	3.69015	11.3873	14045.9	7.02125	45.8922	11.3712	91.6774	0.199028	65.88	10.7364	55.2204	1.34029	38.5602	10.1463	19.3676	2
360300	2016	201.912	99.7863	59.0888	37.9673	3.72166	14.3154	15273.5	7.04367	48.244	7.97816	98.0676	0.234334	67.03	10.8181	54.1556	1.61786	43.6452	10.2974	20.6699	2
360300	2017	149.814	102.657	57.5324	54.2308	5.06857	15.0656	16597.7	7.06694	49.4575	7.86739	118.508	0.298246	68.21	10.8234	69.7764	1.78641	44.8668	8.87277	20.5561	2
360300	2018	147.746	103.752	55.4647	57.1059	4.97392	15.3095	18011.8	6.84515	49.9814	7.15661	131.005	0.342431	69.07	10.8288	65.3795	2.00604	46.6953	8.01488	21.0304	2
360300	2019	144.92	102.266	54.2487	56.5008	4.95164	13.384	19535.7	6.83351	49.3701	7.28907	141.404	0.365343	70.01	10.7472	65.5197	1.6449	42.6647	7.56641	21.2333	2
360300	2020	143.576	101.46	53.4683	56.5508	4.96532	15.7678	20830.9	6.5851	49.4409	7.48105	154.198	0.401795	67.81	10.7846	65.2424	1.93995	39.1882	8.18497	22.1062	2
360300	2021	147.115	100.784	53.4376	54.5226	4.81389	12.564	22861.9	6.70497	49.3423	7.72112	160.418	1.38627	68.77	10.9273	63.2201	1.57642	40.3118	8.21958	22.6103	2
360300	2022	145.475	104.46	53.44	53.3192	4.77129	15.4895	24279.3	6.50541	51.4907	7.73524	173.402	0.73831	69.36	10.9732	61.1946	1.85984	41.0004	8.27704	23.8539	2
360300	2023	138.035	103.461	52.1123	53.7903	4.75884	12.8277	25966.8	6.38666	50.8619	7.65356	185.363	1.16137	70.42	10.9628	60.1946	1.60951	44.6092	8.67331	23.8753	2
360400	2008	100.573	99.3493	31.2891	70.3765	5.02927	11.2426	4660.4	5.60554	41.2225	4.77145	36.1791	0.0132917	27.99	9.57881	45.2731	1.36113	45.0493	14.8809	10.0908	2
360400	2009	101.278	99.4877	31.8112	70.423	5.33992	13.4193	5124.2	5.76027	41.9221	5.66444	40.4633	0.0121037	48.78	9.7369	46.5542	1.51617	44.5685	15.524	10.866	2
360400	2010	101.285	99.2341	32.0568	71.139	5.70312	11.2889	5588	5.6192	41.4504	6.44615	47.2984	0.0200611	42.52	9.93924	48.0847	1.2361	46.4	13.3298	10.6414	2
360400	2011	103.099	98.7846	37.5056	70.9237	5.9923	12.2415	6763	5.6393	42.0048	7.27254	48.9039	0.0369514	44.38	10.127	48.2984	1.66657	45.6353	13.7103	11.8856	2
360400	2012	104.486	98.6386	37.1576	71.1243	6.31504	11.1748	7938	5.73752	42.1648	8.1303	53.3427	0.068115	46.27	10.2372	48.3302	1.52157	45.5129	11.8999	12.3079	2
360400	2013	105.449	99.0532	36.6389	71.3251	6.31645	11.1767	9113	5.81294	42.7063	3.8149	57.9761	0.085893	47.67	10.3585	48.4668	1.31161	44.8289	13.5019	12.9163	2
360400	2014	105.203	99.3806	37.4139	72.2239	6.74459	14.2579	10139.1	5.92627	43.7317	3.97987	60.4171	0.0832493	49.1	10.4542	49.2573	1.57892	43.9774	14.9288	14.1344	2
360400	2015	105.269	99.1265	38.1036	71.1876	7.05546	13.9119	11142.8	5.96958	43.9	4.22145	66.4752	0.0840017	50.56	10.5141	49.4997	1.60639	44.9506	13.7179	14.6419	2
360400	2016	106.335	99.1558	38.568	68.451	7.06682	12.8923	12156.8	6.02356	44.1041	4.17982	78.8638	0.0892184	52.18	10.6044	50.9654	1.66177	44.8648	12.684	15.0383	2
360400	2017	103.661	99.6394	39.558	71.7541	7.32523	12.1941	13303.1	5.43821	43.9015	4.35754	80.6385	0.112453	53.77	10.739	51.7223	1.44027	43.5745	12.284	15.2541	2
360400	2018	102.955	100.124	37.4688	70.4503	7.13782	12.5004	14481.8	5.68171	44.6195	4.50615	91.1767	0.196701	55.27	10.8518	49.783	1.64508	44.0384	9.93978	15.8455	2
360400	2019	98.9695	100.046	37.5824	72.075	7.25062	12.2715	15772.1	5.64736	44.8278	4.65011	124.445	0.224392	56.78	10.9929	51.2856	1.5271	44.3802	9.0224	16.3711	2
360400	2020	103.003	99.9311	37.6406	66.3754	6.92119	16.2263	17051.2	5.21489	45.3289	4.86354	145.6	0.288908	61.18	11.0334	50.4917	1.99521	42.5281	11.657	17.6262	2
360400	2021	101.918	101.434	37.2038	63.2193	6.94868	15.3324	18837.8	5.3148	46.3601	4.94631	154.854	0.502158	62.15	11.1784	50.2733	1.98958	41.2448	12.2326	18.3848	2
360400	2022	96.5665	105.925	35.61	60.0867	7.18785	16.0648	20107.8	5.22617	48.4676	4.89366	166.271	0.648943	62.72	11.2534	50.0945	1.70905	41.5722	11.7815	19.02	2
360400	2023	92.7132	103.77	34.7481	57.3953	7.08517	15.6542	21505.2	5.35664	47.9464	4.85453	175.394	0.876373	63.82	11.2075	50.2787	2.03134	43.2782	11.8486	19.5065	2
360500	2008	121.286	100.876	40.7652	50.3117	4.57384	13.1841	5906.79	5.84633	43.3617	7.59686	81.2294	0.0855142	55.85	10.3938	69.4657	1.34123	44.9488	9.54761	12.368	2
360500	2009	118.848	100.292	40.5607	54.019	1.64951	10.9198	6445.02	6.05078	43.2241	8.48553	86.0261	0.00787587	58.45	10.5676	71.4978	1.38937	44.0609	9.08245	12.2325	2
360500	2010	118.267	99.9846	40.567	57.1323	2.18636	12.2801	7477.47	5.86101	43.3529	9.54754	106.577	0.120126	61.59	10.8872	72.816	1.35035	47.8096	7.85779	12.8989	2
360500	2011	118.237	99.4163	39.8664	60.3389	2.73147	12.5884	8813	5.35499	42.9246	10.4218	102.492	0.0764773	63.58	11.0861	72.6353	1.59246	46.6005	6.73007	13.3129	2
360500	2012	118.234	99.4007	42.2295	63.5787	3.28298	12.9355	10048.1	5.76264	43.8128	11.1182	124.607	0.183162	65.59	11.1405	74.0355	1.57207	46.722	6.6167	14.3816	2
360500	2013	119.85	99.2874	44.6706	16.6184	3.79345	10.9289	11564	5.97761	44.1901	4.98205	121.507	0.146866	66.43	11.1498	72.8401	1.26639	46.1325	7.12041	15.0859	2
360500	2014	118.892	99.293	44.9886	42.2321	4.39086	12.0788	12831.4	6.05829	44.7663	5.29072	97.8887	0.209168	67.43	11.2066	73.5506	1.28373	45.8704	7.58921	15.9849	2
360500	2015	120.69	98.8163	47.4753	45.4086	4.11198	13.6217	13985.8	6.08378	45.2836	5.64616	103.123	0.334853	68.45	11.247	73.5366	1.50006	47.2189	6.74189	17.0884	2
360500	2016	119.807	99.386	48.1266	52.2646	4.19031	16.4502	15202.5	6.18385	46.4108	5.65513	104.252	0.342649	68.86	11.3334	74.1035	1.70724	45.529	7.43529	18.3338	2
360500	2017	122.007	99.2971	49.1702	66.0979	4.26205	15.1675	16581.4	6.14769	46.554	5.65454	87.0167	0.389595	70.01	11.3453	73.8213	1.88401	41.7242	8.33688	18.8841	2
360500	2018	122.67	100.215	49.2897	69.251	4.88241	13.9223	17992.5	6.16708	47.1127	5.58837	109.679	0.474642	70.03	11.3168	73.7126	1.54247	41.8429	9.79953	19.4092	2
360500	2019	123.711	100.298	49.1883	50.1567	4.77621	15.924	19480.5	6.16384	47.8602	5.80177	114.655	0.557964	70.08	11.2614	73.0781	1.77756	39.279	9.33823	20.5425	2
360500	2020	126.485	100.554	48.9172	49.3194	6.85227	14.5094	20746.8	5.43953	47.2284	6.0431	131.869	0.656004	73.59	11.2908	71.2932	1.88602	37.1638	9.29261	20.5977	2
360500	2021	120.391	100.632	50.5062	52.4378	8.26742	14.8524	22603.6	5.5136	47.8527	6.28253	132.916	1.09377	74.14	11.4339	75.2333	1.89617	36.7809	7.56941	21.6551	2
360500	2022	122.992	102.627	50.4652	46.4744	8.46597	14.1561	23858.8	5.44059	48.8355	6.44694	140.244	0.799846	74.43	11.5226	71.7782	1.74484	36.4498	6.77295	22.2126	2
360500	2023	123.221	102.238	50.7115	46.0139	7.84032	15.1641	25319.3	5.54577	49.3671	6.54177	149.39	1.13905	75.08	11.5306	70.0695	1.93597	39.1166	8.26703	23.197	2
360600	2008	406.406	99.6474	36.5728	14.9936	1.23387	12.6771	6280.29	5.5475	44.3352	22.0571	51.7581	0.032653	30.61	10.0034	19.0712	1.41505	40.5245	9.65413	16.7551	2
360600	2009	407.889	99.8203	36.6386	15.7649	1.32225	10.3517	6911.45	5.56542	44.2346	25.146	61.2833	0.0809598	54.31	9.97266	20.0704	1.21082	39.686	12.8574	16.6741	2
360600	2010	406.167	99.6619	36.7629	16.6905	1.42369	10.9173	7608.91	5.50585	44.3682	28.2254	63.5804	0.0819495	47.4	10.2502	20.4651	1.31493	38.6584	9.95983	17.0787	2
360600	2011	410.038	99.6044	32.3213	17.3991	1.50669	12.6299	8379.95	5.61155	44.7319	31.5434	76.2931	0.017015	49.44	10.4645	20.4277	1.46372	37.0187	8.43022	17.5359	2
360600	2012	412.897	99.274	37.4247	18.2058	1.59807	11.9047	9232.64	5.71803	45.0769	35.0595	80.7254	0.0649418	51.25	10.5684	20.6912	1.35583	37.6939	7.69706	18.3345	2
360600	2013	415.01	99.4569	42.5227	19.2198	1.60494	14.5051	10176	5.82191	46.1786	15.669	84.1824	0.141863	52.73	10.7006	20.9549	1.58285	37.8019	8.57778	19.808	2
360600	2014	414.861	99.1841	38.6644	18.9102	1.71034	13.9095	11350.3	5.90035	46.1687	16.6174	85.384	0.21121	54.23	10.7754	21.2365	1.54566	37.4452	10.2007	19.9914	2
360600	2015	415.608	99.0108	39.0507	19.0528	1.78708	14.4665	12382.9	5.97805	46.5563	17.6697	96.9935	0.0396875	55.78	10.8244	21.5126	1.69602	40.46	8.62896	20.6892	2
360600	2016	418.481	99.4718	39.3548	18.3188	1.79566	15.7396	13534.5	6.05502	47.3646	17.9477	98.6781	0.0906642	57.48	10.9027	21.5806	1.76866	41.9886	8.67389	21.6287	2
360600	2017	406.525	99.9905	39.3734	19.9853	1.86788	13.7132	14737.2	6.13126	47.5786	18.8051	108.155	0.294947	59.08	10.9879	22.3227	1.57167	42.6105	10.0872	21.6964	2
360600	2018	404.017	100.06	39.3498	20.8832	1.81892	13.0223	16145.3	6.15556	47.8787	19.6311	114.044	0.317536	60.68	11.0586	22.3741	1.54598	43.1008	8.0352	22.2389	2
360600	2019	388.316	100.062	39.3256	21.0861	1.84796	13.1888	17667.8	6.08279	48.1256	20.4807	146.195	0.248638	62.04	11.1975	23.59	1.70616	40.1098	8.47595	22.7306	2
360600	2020	403.019	100.209	39.2434	20.1464	1.76891	13.9972	18872.8	5.28423	47.8872	21.2786	149.571	0.547805	64.41	11.2411	22.9949	1.80835	37.7244	8.00543	23.3566	2
360600	2021	403.147	100.333	39.1944	19.8962	1.75667	16.2092	20686.5	5.35206	48.8328	22.0154	158.129	1.07126	65.43	11.3928	22.9258	1.67647	39.5127	8.93696	24.7158	2
360600	2022	399.079	101.386	38.7532	19.4364	1.73927	18.4776	21891.6	5.27958	49.8224	22.3716	167.914	0.679586	66.04	11.4718	22.8483	2.22794	39.816	8.38741	25.6381	2
360600	2023	392.894	101.198	39.6424	18.8981	1.67192	16.5494	23453.3	5.41923	50.0034	22.9313	173.893	0.963886	67.13	11.5048	22.9516	1.71166	43.2576	8.77359	26.0833	2
360700	2008	143.139	98.6529	50.3297	39.6145	3.25014	10.2348	3570	4.92618	41.0593	7.78901	54.4983	0.0321463	22.15	9.14755	67.0428	1.2484	45.7844	15.0581	11.3048	2
360700	2009	143.67	98.5764	51.2665	42.8776	3.59153	11.8158	3856	5.17329	41.6426	9.3043	59.3672	0.040361	22.24	9.25784	66.4421	1.42499	46.0039	14.5814	11.947	2
360700	2010	145.435	98.2077	52.2021	45.9864	3.92113	12.124	4182	4.92666	41.4052	10.9543	65.938	0.102894	37.53	9.42075	65.7789	1.45334	46.1965	14.112	12.1488	2
360700	2011	150.942	99.5678	49.2422	47.2653	4.09297	9.54547	4684	5.12234	41.7876	12.2108	72.2655	0.162094	39.34	9.58525	65.7049	1.16835	46.3207	13.2031	11.8905	2
360700	2012	150.499	100.457	52.3657	49.9479	4.38431	12.5624	5301	5.12874	42.9365	13.332	77.648	0.164472	41.16	9.69757	65.4695	1.51171	46.8129	13.563	13.0475	2
360700	2013	148.228	100.95	55.1893	53.8118	4.49351	12.566	6224	5.16917	43.5435	5.73279	81.0653	0.120363	42.56	9.79933	66.236	1.51868	47.1179	12.6032	13.7366	2
360700	2014	149.635	99.9866	55.3194	52.4282	4.74187	11.5993	6945.98	5.17723	43.192	6.03925	86.5433	0.0977401	43.99	9.86894	66.0767	1.3674	47.2755	13.8502	13.926	2
360700	2015	150.108	100.621	56.0599	52.7519	4.94793	12.5738	7786.47	5.17755	43.8601	6.32911	91.8877	0.126107	45.51	9.9305	66.2099	1.47073	49.0549	13.1226	14.6174	2
360700	2016	149.653	101.896	55.6574	51.2257	5.0213	15.6586	8728.63	5.15053	45.0707	5.74607	99.1899	0.229184	47.13	10.0315	65.8052	1.91208	47.008	13.9875	15.6544	2
360700	2017	145.96	102.455	54.2558	55.6626	5.20238	13.5051	9716.71	5.15837	45.1319	5.83155	114.738	0.312385	48.72	10.1559	65.7438	1.58999	52.4156	12.3029	15.5821	2
360700	2018	143.09	101.835	53.6297	58.964	5.13576	14.8418	10782	5.26348	45.4264	5.88752	152.945	0.39831	50.29	10.2617	65.8155	1.90731	53.0038	10.6693	16.3	2
360700	2019	142.341	100.359	53.5281	57.5242	5.04133	15.1561	11941.1	5.29536	45.1926	6.1036	173.201	0.481033	51.85	10.4728	65.9417	1.92676	49.947	9.29692	16.8922	2
360700	2020	140.106	101.195	52.9945	57.9517	5.08832	16.6169	13036.1	5.14053	45.8534	6.29183	195.674	0.612243	51.85	10.5203	65.3792	2.06329	46.8975	13.128	17.585	2
360700	2021	142.437	100.836	52.6796	56.3131	4.97197	16.5126	14675.5	5.20448	46.1899	6.45432	210.353	0.759737	56.35	10.6541	63.8009	2.02437	48.8611	13.6669	18.4188	2
360700	2022	138.307	103.296	51.3678	56.0827	5.01859	13.3579	15900.1	5.11024	46.8504	6.5857	230.321	1.13143	57	10.7338	63.7082	1.77336	50.0802	13.0428	18.2802	2
360700	2023	135.981	102.846	50.4514	54.6028	4.83073	16.8591	17380.6	5.26265	47.7109	6.7387	248.909	1.64123	58.18	10.7511	63.0633	2.06686	53.4661	13.3671	19.6279	2
360800	2008	99.4323	99.0654	51.6967	59.3663	4.88439	11.1948	5290.49	5.59757	42.2453	6.87538	57.5716	0.0212343	23.02	9.25024	86.096	1.31806	48.59	18.4225	12.0473	2
360800	2009	100.628	98.9936	51.1709	62.4932	5.24098	11.9529	5790.58	5.78654	42.6291	7.86165	56.7175	0.030206	41.57	9.38786	85.6925	1.55906	47.2149	19.2984	12.5043	2
360800	2010	101.468	98.42	51.9923	66.2322	5.64944	12.5043	6337.97	5.75015	42.6077	8.97784	64.7793	0.0614533	37.59	9.58568	85.7368	1.3035	48.1249	18.0603	12.9309	2
360800	2011	103.23	98.8371	57.1624	69.1105	5.98468	9.65448	6937.16	5.9309	42.9265	10.0851	71.0434	0.116924	39.62	9.77139	84.7917	1.29802	47.8117	16.5769	13.243	2
360800	2012	103.859	99.3609	55.4255	72.3782	6.35318	11.8538	7593.05	6.07125	43.7123	11.158	74.6226	0.159442	41.62	9.89879	84.931	1.2705	48.2586	18.2214	13.935	2
360800	2013	103.667	100.151	53.2401	76.943	6.42506	11.6535	8311	6.20876	44.2315	4.88519	81.2701	0.135207	43.13	10.0023	85.0679	1.36272	47.9095	17.2881	14.1594	2
360800	2014	102.756	100.028	53.0039	76.3473	6.90523	11.1445	9261.78	6.28048	44.3855	5.12993	84.7192	0.167092	44.65	10.0683	83.9758	1.30057	48.4086	18.3467	14.5336	2
360800	2015	102.397	99.536	53.6286	77.3309	7.25335	12.6218	10354.9	6.35284	44.7873	5.40108	89.3522	0.192061	46.17	10.1286	82.9021	1.53672	49.2391	18.4242	15.4254	2
360800	2016	102.571	99.99	54.1467	74.739	7.32615	13.7759	11380	6.42584	45.5272	5.64888	94.5295	0.202261	47.76	10.2152	81.8462	1.50096	43.6715	17.3095	16.249	2
360800	2017	98.9971	100.64	53.9145	82.0682	7.67033	14.2931	12543.1	6.4995	46.2107	5.85863	93.1656	0.283205	49.37	10.3051	80.8079	1.64238	47.5279	15.2518	16.9014	2
360800	2018	96.8427	101.655	53.0475	87.1223	7.58834	17.6569	13819.9	6.53522	47.482	6.05322	99.4313	0.355867	50.95	10.3835	79.7865	1.9437	47.6256	12.8558	18.114	2
360800	2019	92.2307	100.982	52.6005	88.7783	7.78039	12.8758	15227	6.48318	46.7038	6.2363	107.98	0.403409	52.52	10.5613	78.7817	1.59232	43.8124	11.735	17.7546	2
360800	2020	95.0979	100.868	52.8289	85.379	7.49651	18.0232	16491	5.70682	47.0264	6.4934	121.063	0.576157	52.35	10.6022	77.7931	1.90301	41.3025	13.0469	19.0606	2
360800	2021	95.1899	100.268	53.2567	84.2642	7.43982	14.3121	18298	5.8058	46.7948	6.79766	130	0.71701	53.41	10.7569	76.8204	1.75198	41.9347	13.2761	19.3284	2
360800	2022	93.3328	102.36	54.9748	83.1073	7.43689	17.0052	19587.9	5.70456	48.395	7.12027	140.432	0.936092	54.07	10.84	76.2548	1.93295	42.2691	13.1826	20.604	2
[truncated: 2,593 more rows]

## Sheet: Variable definitions
Variable symbol	Variable
x1	Multiple cropping index
x2	Cultivated land preservation rate
x3	Effective irrigation rate
x4	Agricultural diesel use intensity
x5	Plastic film use intensity
x6	Livestock and poultry manure comprehensive utilization rate
x7	Rural per capita disposable income
x8	Grain yield per hectare
ag_green	Agricultural green development（Results of the equal-weighting calculation）
ag_mech	Agricultural mechanization
m1	Factor utilization effect
m2	Factor preservation effect
urban	Urbanization rate
gdp_per	Economic development level
crop_struct	Grain cropping structure
human_cap	Rural human capital
ag_struct	Agricultural industrial structure
fis_agr	Fiscal agricultural support intensity
ag_green_new	Agricultural green development（Results of entropy weight calculation）
risk	Agricultural disaster risk level（Assign 1 for observations below 0.25 and 2 for those above 0.25.）
