# Supplementary material
Source: Research Square preprint supplement (doi:10.21203/rs.3.rs-9722888/v1)
Supplement: Supplementary file 2 [file e73eaecf3cdd8682dc04e115.xlsx]

## Sheet: Sheet1
year	id	Cereal production (tonnes)	Total power of agricultural machinery (kilowatts)	Area of arable land (hectares)	Total area sown with crops (hectares)	Area under cereal cultivation (hectares)	Area of irrigated arable land (hectares)	Total Output Value: Agriculture, Forestry, Animal Husbandry and Fisheries (ten thousand)	Total agricultural output value (ten thousand)	Expenditure on agriculture, forestry and water resources (ten thousand)	General public budget expenditure (ten thousand)	Application rate of agricultural fertilisers (kg)	Amount of plastic mulch used (kg)	Agricultural diesel consumption (litres)	Pesticide application rate (kg)	Per capita net income of farmers (CNY)	Agricultural insurance premium income (thousands)	Comprehensive utilisation rate of livestock and poultry manure (%)	Urbanisation rate（%）	Average years of education among rural residents	logarithm of per capita regional GDP	Agricultural disaster risk level
2008	110000	1254500	2670500	420610	319010	226330	241660	3039000	1281000	1217700	19592900	136300000	5038000	53520000	3869400	19641	249840	45.059	84.9	5.34185	11.2983	0.170762
2009	110000	1247700	2715400	410628	316760	226290	218710	3149500	1461300	1420100	23193700	138200000	4300000	59280000	3980950	20927.1	338440	53.8368	85.01	5.79035	11.4881	0.170762
2010	110000	1156900	2760000	399859	313620	223470	211420	3280200	1542200	1586400	27173200	136700000	4344000	46920000	3972210	21060.8	366630	55.3881	85.96	5.68943	11.6281	0.170762
2011	110000	1217700	2652000	389546	298620	209380	262060	3631400	1633700	1873400	32452300	138400000	3728000	47520000	3936450	21198.3	430800	47.6403	86.23	6.20636	11.7533	0.170762
2012	110000	1137700	2411000	379569	278030	193870	207540	3957100	1662900	2226900	36853100	136700000	3447000	46560000	3878730	23247.4	512610	52.5858	86.2	6.37883	11.8336	0.170762
2013	110000	961300	2077200	369824	237290	158910	153020	4217800	1704100	2976200	41736600	127800000	3345000	44400000	3864300	23032.4	558060	53.9057	86.3	6.55746	11.906	0.170762
2014	110000	639400	1957600	357998	194640	120170	143110	4200700	1551000	3436700	45246700	116400000	2903000	40320000	3602800	24401.1	451610	62.7756	86.4	7.38921	11.9828	0.170762
2015	110000	626400	1860500	340087	172140	104450	137350	3682400	1544800	4247800	57377000	105300000	2663000	33360000	3173700	25118.2	574050	62.5985	86.51	7.48687	12.0499	0.170762
2016	110000	527600	1444500	321416	145550	85540	128470	3380600	1452000	4435500	64067700	96500000	2605000	30360000	3030500	25222.4	600120	61.1147	86.5	6.96597	12.1459	0.170762
2017	110000	411200	1335100	308356	120940	66840	115480	3083200	1298300	5183500	68245300	85500000	2342000	27000000	2725900	25784.4	638740	64.676	86.45	7.47972	12.2363	0.170762
2018	110000	341400	1256500	300731	103790	55640	109670	2967700	1147500	5760400	74714300	72900000	2079000	23160000	2574450	27035.6	777200	71.2635	86.5	7.57963	12.303	0.170762
2019	110000	287600	1228400	296365	88550	46520	109240	2817000	1023300	5846200	74081900	61700000	1758000	21600000	2257000	27954.4	815780	67.1983	86.6	7.65301	12.4419	0.170762
2020	110000	305300	1202200	294946	98180	48900	109350	2634300	1075700	4973300	71161800	60600000	1667000	20400000	2149000	28043.4	993660	64.2788	87.55	8.33619	12.4563	0.170762
2021	110000	377500	1212500	295925	117850	60920	109320	2695100	1229800	4978700	72051200	63000000	1606000	19200000	2334000	28256.1	1304920	72.5132	87.5	7.99952	12.5595	0.170762
2022	110000	453600	1211400	301615	143810	76730	112140	2681800	1297700	4627900	74691500	66100000	2000000	20400000	2000000	29572.2	1515220	73.2975	87.57	8.50125	12.5824	0.170762
2023	110000	477800	1239400	306327	158980	89470	118000	2526200	1356000	5155300	79712500	67500000	2000000	19200000	2000000	29351.5	1788640	71.9416	87.8	8.22117	12.6337	0.170762
2008	120000	1494600	5966000	811057	436930	293710	348060	2564000	1203500	385400	8677200	258800000	6458000	193080000	3807000	12858.3	20310	30.1743	77.21	3.52915	11.0911	0.0915854
2009	120000	1571300	5950000	802101	440310	306760	347380	2632100	1278600	636900	11242800	259600000	5891000	201840000	3805000	14322.4	30730	33.6903	78.02	4.08622	11.2485	0.0915854
2010	120000	1605600	5877900	792183	438780	311370	344610	2894100	1495200	671400	13768400	255400000	5730000	204360000	3721000	13988.9	35680	31.3055	79.57	4.01724	11.4475	0.0915854
2011	120000	1631600	5838700	781219	442450	310670	365210	3118300	1552000	917800	17963300	243900000	5696000	191160000	3796000	15220	57420	36.744	80.5	4.63777	11.6394	0.0915854
2012	120000	1635600	5681300	768212	448980	322920	337040	3274400	1641900	1009800	21432100	244500000	5355000	191880000	3808000	15229.5	93500	35.531	81.56	4.43992	11.7739	0.0915854
2013	120000	1774400	5541800	754445	441340	333970	308870	3511200	1766300	1230300	25492100	243400000	4877000	183960000	3639000	15959.1	165480	42.2685	82	4.87319	11.8715	0.0915854
2014	120000	1781900	5523300	741013	443010	346660	308870	3677500	1822300	1349100	28847000	232700000	4637000	183960000	3642000	15646.9	196870	35.2042	82.27	4.66105	11.9492	0.0915854
2015	120000	1844800	5469200	727101	433280	352150	308870	3784400	1825100	1560800	32323500	217800000	4493000	186000000	3528240	16352.5	256500	36.8938	82.64	4.91878	11.9895	0.0915854
2016	120000	2004000	4699900	713657	443660	362000	306620	3955700	1818900	1610200	36994300	217800000	3942000	178680000	3307000	16498.6	292750	36.9274	82.91	4.49752	12.0513	0.0915854
2017	120000	2122700	4646500	704092	439520	351400	306620	3820700	1831700	1583600	32825400	180100000	3751000	168360000	2353470	17039.6	384070	39.6111	82.92	4.55053	12.082	0.0915854
2018	120000	2096900	3479800	699637	429270	350210	304660	3905000	1972100	1657100	31031600	169500000	3178000	26400000	2189950	17550.2	497910	42.2989	83.15	5.10961	12.0659	0.0915854
2019	120000	2232500	3598400	696627	410270	339270	304800	4143500	2029100	1615100	35557100	162400000	3030000	25200000	2171000	18328.4	511270	47.2204	83.48	5.02783	11.7542	0.0915854
2020	120000	2281800	3650800	695022	419170	350200	299120	4764400	2287600	1548200	31513500	152900000	2742000	24000000	1997000	19635.6	609320	50.8	84.7	5.53814	11.7332	0.0915854
2021	120000	2498700	3724800	697107	437000	373480	285430	5092600	2583900	1480100	31525500	156600000	2480000	24000000	1742000	20253.2	631130	51.8381	84.88	5.81248	11.8222	0.0915854
2022	120000	2562100	3707700	702107	443510	376670	293980	5214400	2768000	1103000	27298300	155200000	2000000	22800000	2000000	19733.8	653320	47.4856	85.11	6.01178	11.8529	0.0915854
2023	120000	2557300	3688000	707412	453100	390030	309000	5112600	2693900	1269500	32804200	154400000	2000000	20400000	2000000	20238.3	743440	52.7085	85.49	5.5621	11.8653	0.0915854
2008	130100	5067426	19235600	892297	1007670	755790	497780	5429731	2758658	163886	1937900	478234000	3043000	684805200	13602000	47321.1	78000	27.2899	41.21	3.40911	10.2877	0.162305
2009	130100	4979252	19320500	886332	995550	756430	480660	5477617	2845448	225726	2409200	478812000	2981000	440786400	13806000	51675.3	32300	31.1828	49.15	3.72562	10.3322	0.162305
2010	130100	5079153	19597300	879540	1020560	772610	480290	6515543	3588328	246619	3051600	483537000	3071000	479166000	13800000	49203.3	29410	30.8331	42.02	3.66584	10.4453	0.162305
2011	130100	5317179	19770100	873381	1011120	769860	497770	7272965	3870787	331412	4035400	486890000	3145000	459850800	13729000	56249.6	88740	35.3836	44.04	3.96748	10.6198	0.162305
2012	130100	5320952	19838200	868101	1009490	764560	502840	7874961	4299282	398896	4640900	488997000	3195000	353940000	13718000	52818.1	154450	30.1731	45.13	3.83203	10.7092	0.162305
2013	130100	5256066	19966400	861351	1006880	758540	507910	8519016	4705433	502529	5229400	487890000	3212000	347665200	13612000	58249.9	242830	37.7529	46.29	3.98213	10.7889	0.162305
2014	130100	5029977	20221800	851893	1005130	756880	508830	8851619	4610001	527442	5664900	488871000	3233000	361107600	13212000	59636.1	237190	37.9335	47.59	4.4589	10.8287	0.162305
2015	130100	5047938	20404500	843782	1002840	755350	512610	8955030	4930922	678688	6823900	501190000	3219000	364740000	12799000	57256.9	274890	33.4192	58.3	4.38342	10.8758	0.162305
2016	130100	4958248	12808000	835608	998990	737480	500480	8809674	4689309	739653	7461200	485349000	3166000	324904800	12248000	60361.9	300790	40.054	59.96	4.51807	10.9527	0.162305
2017	130100	5.11214e+06	13004300	828854	914690	776710	504020	6345669	3123391	755964	8067300	471105000	3158000	325912800	12079000	65675	360250	43.7595	61.64	5.08282	11.0585	0.162305
2018	130100	4.87336e+06	12837200	822732	911660	773570	497830	6739068	3371553	812006	9916100	406290000	2200900	313448400	8433000	62694.2	463990	35.5928	63.16	4.41795	11.0339	0.162305
2019	130100	4843758	13008100	817182	891730	756860	498030	7259454	3563120	970902	10513900	395361000	1848000	295954800	8055000	65055.2	551830	40.385	64.41	4.52352	10.9192	0.162305
2020	130100	4.9612e+06	13043800	813293	896260	758170	498010	8101134	3806860	1031255	11422300	389784000	1910000	172197600	7813000	70104.1	713270	44.151	70.2	5.40394	10.941	0.162305
2021	130100	4.98394e+06	13181400	814211	896940	759050	463190	8220638	3987346	783323	11527400	381164000	1865400	168030000	7723000	69690.8	718790	41.8168	71.09	4.62199	11.0309	0.162305
2022	130100	5.02526e+06	13460600	822569	905840	762940	421430	9071761	4640895	861982	12504300	372241000	1807000	166324800	7292000	73712.4	782940	45.5186	71.44	5.32476	11.118	0.162305
2023	130100	5.04612e+06	13556100	828218	910670	763920	424200	9375204	4807556	929726	12748300	371779000	1824000	165430800	7293000	71153.5	903880	42.6945	72.28	4.719	11.1693	0.162305
2008	130200	2879330	9842800	986947	787170	463700	495030	5553015	2766239	234036	2570426	373930000	7079000	342426000	5706000	30416	65390	18.2731	33.51	2.30825	10.796	0.162305
2009	130200	3039666	10316200	977788	786020	471980	484270	5726771	2788095	304495	2857675	379781000	6757000	508678800	5825000	29054.4	76440	18.1585	33.43	1.9871	10.8581	0.162305
2010	130200	3100000	10800100	969065	790470	478710	485160	6588815	3696499	355881	3324335	381656000	6469000	510620400	6316000	30931.3	97340	18.1719	32.63	2.12645	11.0154	0.162305
2011	130200	3177564	11144200	960327	803180	488910	518830	7574835	4308097	410030	4416812	379543000	6550000	316641600	5741000	30968.1	127140	19.2806	32.41	2.20792	11.2096	0.162305
2012	130200	3113878	11485400	951848	803340	490540	490610	8188379	4747318	462249	4903141	384735000	6341000	476538000	5805000	32254.9	195230	18.9437	53.6	2.32256	11.2774	0.162305
2013	130200	3082921	11797500	942155	804370	487900	462390	8787111	4869008	480818	4971792	386382000	6187000	519295200	5717000	33172.5	233260	19.806	54.97	2.57339	11.325	0.162305
2014	130200	3049997	12066200	932933	804370	487410	455570	8982721	4651797	452294	5246569	386788000	6255000	506446800	5811000	32903.7	230250	20.6362	56.21	2.32023	11.3224	0.162305
2015	130200	3083737	12289700	925395	807110	494370	456090	9112116	4919492	497990	5922620	380589000	6332000	499671600	5614000	35351.3	249380	22.8378	58.31	2.52248	11.3002	0.162305
2016	130200	3054934	7667400	920958	806220	478820	458130	9615708	5043740	561816	6425412	383363000	6117000	219645600	5549000	35255.1	230820	20.8343	60.41	2.57386	11.334	0.162305
2017	130200	2.88832e+06	7758400	918329	721670	480040	458140	7647722	3677405	469557	6626323	380479000	6001000	221661600	5304000	35554.5	288680	20.6879	61.64	2.57695	11.3678	0.162305
2018	130200	2781700	7879300	914967	710740	472740	462870	8068295	3956264	623738	7492880	396803000	5261000	217250400	4779000	40175.5	339350	24.9349	63.14	2.96202	11.4269	0.162305
2019	130200	2857244	7934100	909230	717810	480540	462870	8704370	4154202	707682	7975076	353606000	5421000	132805200	4432000	40333.5	357300	25.1939	64.32	2.72561	11.4201	0.162305
2020	130200	2.8984e+06	8038100	903878	721760	486100	463980	9764508	4519873	786441	9262511	329514000	5524000	94719600	4250000	42047.8	502360	27.4897	64.32	2.80206	11.469	0.162305
2021	130200	2.93811e+06	8134000	901688	723190	489560	464110	9968206	4743669	682681	9214638	324280000	5195000	94538400	4092000	41366.5	520240	25.2616	65.42	2.76998	11.6046	0.162305
2022	130200	2.96745e+06	8240900	903568	723130	490730	397910	10461560	4908658	671801	9369039	319642000	5180000	96052800	4011000	44879	662890	25.0633	65.79	3.02524	11.6829	0.162305
2023	130200	2.99596e+06	8291700	905618	720740	490160	397920	10701642	4893752	637691	10015337	315856000	5239000	95494800	3933000	42234.7	752760	25.7918	66.71	2.82812	11.7094	0.162305
2008	130300	856820	2885700	351663	211720	140530	129510	1683738	641706	77229	941871	128300000	2083000	28105200	6187000	26539.1	21680	17.2536	42.01	1.83094	10.2506	0.162305
2009	130300	820795	2952700	346899	213820	140990	132740	1840505	791187	210050	1037192	132372000	2052000	66054000	6128000	30871.4	24320	17.876	43.35	2.15968	10.2403	0.162305
2010	130300	868244	2950400	343245	220750	147120	134520	2273032	982622	127905	1357443	139520000	2021000	104002800	6069000	31921	28610	20.305	43.19	2.20198	10.3821	0.162305
2011	130300	891866	2968400	340877	222330	147780	116680	2536512	1055955	164926	1686186	143112000	1990000	141951600	6010000	33430.5	34840	19.8109	43.43	2.42652	10.5166	0.162305
2012	130300	809233	3035900	338911	221660	148050	123280	2739487	1157599	171719	1999739	145671000	1959000	179900400	5951000	29795.6	55320	19.6732	43.47	2.09883	10.5746	0.162305
2013	130300	843950	3328100	335698	219650	146250	129880	3055295	1367093	183884	2003166	147312000	1928000	217849200	5892000	34046.7	61560	22.2838	43.33	2.3292	10.5949	0.162305
2014	130300	852824	2983100	331116	220150	147520	127510	3153803	1363945	189390	2119627	151891000	1930000	172254000	5981000	34096.3	53030	21.3389	43.59	2.50851	10.6131	0.162305
2015	130300	844406	2922300	327057	220180	148330	126730	3188255	1376411	218474	2282969	146497000	1771000	168822000	5640000	37004	73910	21.4959	54.07	2.77012	10.6525	0.162305
2016	130300	811358	1805100	323609	213530	137070	127720	3519932	1462461	206102	2455712	141557000	1958000	122662800	5284000	35935.1	61070	20.7566	56.13	2.76871	10.7206	0.162305
2017	130300	756614	1726000	322293	193640	128990	127780	3497035	1400948	218654	2626987	135318000	1847000	123028800	5009000	38406.7	67780	23.8144	57.88	2.67271	10.8267	0.162305
2018	130300	742235	1762400	319926	197690	131250	127730	3698760	1485191	254939	2912487	130402000	1628000	115449000	4234000	40889.5	95990	24.5783	59.42	2.98115	10.9063	0.162305
2019	130300	727192	1775400	315648	194360	126890	127730	3787459	1501181	291405	3179413	116015000	1671700	107869200	3731000	40779.3	119210	26.2799	60.72	2.87375	10.8885	0.162305
2020	130300	749878	1755300	310941	196550	128570	127810	4306181	1648476	365688	3402821	113519000	1691500	70203600	3499000	37803.6	165530	22.1466	63.97	2.93304	10.935	0.162305
2021	130300	759976	1762900	310026	197220	129670	145390	4444470	1796288	275380	3109139	108741000	1634000	51384000	3331000	38172.8	203400	23.5464	64.95	2.6919	11.0263	0.162305
2022	130300	770172	1848700	312357	197890	130550	100550	4693424	1950959	297800	3161096	105737000	1642000	50515200	3180000	38932.5	232880	23.6978	65.47	2.65321	11.0614	0.162305
2023	130300	778743	1894800	314437	198200	129670	119850	4849586	2017822	299437	3781518	104004000	1553000	49305600	3080000	38974	283450	24.0406	66.43	2.7484	11.1079	0.162305
2008	130400	4469696	12732300	921235	1076020	761830	534460	4219313	2081577	136492	1549911	453738000	8345000	502795200	8370000	26101.9	45130	16.599	40.93	1.96318	9.97329	0.162305
2009	130400	4519936	13298400	916915	1070790	761590	547150	4375365	2317972	210050	1977222	461474000	8554000	417232800	8927000	27983	79480	17.4258	42.58	2.02671	9.97003	0.162305
2010	130400	4761218	13728000	910215	1079800	774290	547280	5382107	3079421	256073	2638552	472588000	8330000	398868000	7948000	31715.6	89750	19.4298	44.42	2.29323	10.1068	0.162305
2011	130400	5282949	14195600	903791	1077530	782520	575860	6206530	3291093	318470	3286308	471673000	8660000	354904800	8040000	31081.8	82140	20.0081	45.38	2.31392	10.2562	0.162305
2012	130400	5600800	14523900	897593	1071220	775290	550450	6729017	3773077	348602	3795561	478968000	9017000	398656800	8487000	31056.7	118980	18.8017	46.58	2.07222	10.3239	0.162305
2013	130400	5556190	14795600	891172	1062230	767580	525040	7183823	4011746	399656	3671338	479275000	9236000	347314800	8407000	33560.3	133080	20.8824	47.91	2.52	10.3353	0.162305
2014	130400	5448521	15051500	883939	1059150	769120	534440	7455364	3991206	537703	4046724	492502000	9416000	333981600	8378000	36269	140000	20.7788	49.13	2.69473	10.3062	0.162305
2015	130400	5424620	15301900	877655	1057440	773410	537800	7423359	4061188	676953	5156300	489149000	9360000	330727200	7995000	34016.1	181940	19.2393	51.38	2.34284	10.3078	0.162305
2016	130400	5465540	9757800	870541	1057980	781540	533650	7663825	4159001	667810	5316404	481400000	10116000	209596800	7680000	38605.2	172970	24.8476	53.53	2.86767	10.3619	0.162305
2017	130400	5.63759e+06	10016400	864540	1008260	821460	538740	5634283	2998606	584128	5470074	457976000	9306000	248790000	7293000	38704.8	198940	25.1594	55.31	2.815	10.3783	0.162305
2018	130400	5281970	10263200	859802	999760	805830	555980	5776355	3080503	729024	6259998	439524000	6429200	242685600	5792000	37230.8	213980	24.4324	56.87	2.51724	10.3937	0.162305
2019	130400	5175651	10462100	855305	985450	785320	555990	6334109	3219191	804380	6972080	434803000	6270000	226820400	5294000	38778.7	243660	24.3834	58.15	2.71798	10.3999	0.162305
2020	130400	5.33077e+06	10673300	850516	984990	776800	557330	7015005	3548976	857583	7892357	418131000	5967000	170155200	5128000	39836.7	394490	25.1188	58.27	2.70417	10.4423	0.162305
2021	130400	5.37e+06	10873300	848926	982150	780830	556150	7332817	3879024	840500	7504067	398593000	5944000	165331200	5003000	41716.9	420620	24.0373	59.59	3.14891	10.5658	0.162305
2022	130400	5.42851e+06	11079000	851138	993630	785630	481270	8208194	4539156	847355	8456166	395214000	5516000	152704800	4944000	43488	575120	25.313	66.48	3.06584	10.6176	0.162305
2023	130400	5.44544e+06	11293800	853659	988770	784440	481720	8402542	4671411	858596	8716485	373636000	5350000	151790400	4840000	42592.5	684630	24.5418	61.44	3.215	10.6139	0.162305
2008	130500	3987803	8637500	993856	988160	689569	561610	2654600	1586700	122125	1097201	332225000	10399000	362743200	10919000	28766.4	60990	17.405	23.35	2.14566	9.54691	0.162305
2009	130500	4033170	8988500	991661	1002980	706513	523840	2781400	1645600	208340	1326306	337761000	10313000	370812000	11005000	26777.6	69970	17.3855	39.88	1.93688	9.59551	0.162305
2010	130500	4241498	9290700	988559	1012510	717550	531130	2871800	1798800	195013	1723385	344675000	10227000	378880800	11091000	30262.6	86500	17.6847	40.93	2.25791	9.71462	0.162305
2011	130500	4527582	9333700	985023	1021300	718395	573850	3824200	2350800	254261	2146098	352447000	10141000	386949600	11177000	33797.9	85980	21.5921	41.84	2.3682	9.87256	0.162305
2012	130500	4532144	9549400	981497	1019570	718054	566530	4195400	2613400	294148	2502476	353794000	10055000	395018400	11263000	34045.8	163710	21.3035	42.85	2.53795	9.92771	0.162305
2013	130500	4484739	9800200	978871	1018700	716550	559210	4607500	2871300	328003	2591944	354765000	10948000	398739600	11134000	32340.2	193760	18.1221	44.2	2.41769	9.95383	0.162305
2014	130500	4447854	10101300	974593	1018970	715353	567190	4964100	3027200	464310	2946228	364447000	10261000	408666000	10615000	34926.7	202950	22.8542	45.43	2.49825	9.96687	0.162305
2015	130500	4511001	10220100	969340	1024420	730147	577390	4914300	3089000	599217	3736715	366018000	10495000	412489200	10512000	36006.8	260920	21.6224	47.73	2.50876	10.0263	0.162305
2016	130500	4574605	8216800	962474	1029160	741013	587200	4776000	2934600	657556	4093874	362227000	10062200	340086000	10253000	36589.2	248010	21.3693	49.83	2.47571	10.1295	0.162305
2017	130500	4.82626e+06	8376400	955679	999700	794783	587610	4289100	2883600	592919	4185241	343951000	8697500	350760000	9519000	37485.9	289230	22.1218	51.57	2.53103	10.1835	0.162305
2018	130500	4665223	8780300	950338	977750	782444	587650	4612100	3053700	640560	4948361	313509000	8329875	324187800	9025000	39404.8	321610	25.3523	52.91	2.72442	10.2031	0.162305
2019	130500	4744635	9000300	945867	970420	772558	594370	4939500	3103700	733781	5504747	304870000	7962250	297615600	8531000	38568.2	368700	24.249	54.23	2.70079	10.1837	0.162305
2020	130500	4.85214e+06	9243700	943219	968020	763513	594660	5454000	3351000	816046	6145000	299741000	7594625	271043400	8037000	40711.5	499590	23.2925	54.1	3.08784	10.2213	0.162305
2021	130500	4.89441e+06	9364400	942435	961150	770256	595170	5797800	3732400	734285	5730000	292753000	7227000	244471200	7543000	42567.8	524260	27.2274	54.74	3.207	10.3201	0.162305
2022	130500	4.93828e+06	9455000	944117	941780	771000	505020	6122500	3961900	807789	6156000	286524000	7011000	242804400	7227000	39390.7	639850	24.3789	55.25	2.96641	10.3659	0.162305
2023	130500	4.73254e+06	9631200	945308	924700	771100	511840	6100000	3910100	1031437	6417000	280996000	6287000	240327600	6914000	43461.3	755430	27.7988	56.32	3.27431	10.3717	0.162305
2008	130600	5392111	10985500	1.2128e+06	1198810	903100	624870	4272693	2487025	150701	1662787	431388000	5467000	606714000	10931000	28685.9	69040	18.819	27.59	2.15862	9.53578	0.162305
2009	130600	5593651	11407100	1.20599e+06	1199650	908250	667290	4509879	2799687	208340	2003560	440067000	5638000	325870800	11235000	27837.3	78830	15.7728	35.85	1.86326	9.61412	0.162305
2010	130600	5851342	11654000	1.19881e+06	1216950	918790	665540	5250102	3341197	270977	2689044	445778000	5394000	330154800	11273000	29632.6	90090	17.8231	30.23	2.20347	9.77904	0.162305
2011	130600	6146995	11918800	1.19365e+06	1229400	929790	678930	5994036	3638035	321657	3326700	461145000	5193000	322060800	11259000	30765.8	80410	19.4631	30.27	2.18691	9.95736	0.162305
2012	130600	6044701	12173400	1.18865e+06	1224450	921500	661590	6607465	3983417	250103	3835725	468763000	5187000	334482000	11908000	33153.9	167510	21.8377	30.16	2.25137	10.0525	0.162305
2013	130600	5963733	12419600	1.18226e+06	1218040	914770	644250	7272956	4444368	504435	4604250	468650000	4847000	304609200	13727000	32105.9	208840	17.9705	27.57	2.28371	10.1248	0.162305
2014	130600	5732662	12607900	1.17169e+06	1216300	916120	646520	7578391	4557682	502847	4575943	473886000	5077000	288470400	13439000	33786.3	234990	20.6485	37.99	2.3468	10.1411	0.162305
2015	130600	5700214	12697600	1.15842e+06	1215820	918290	653370	7632965	4690619	565362	5668009	477107000	4794000	312186000	12835000	34591.9	244570	20.2628	46.67	2.48242	10.1249	0.162305
2016	130600	5706790	7516900	1.14507e+06	1210300	905040	657130	7973300	4790494	697938	6120552	481081000	4925000	309648000	13133000	33377.4	278480	20.251	52.82	2.36604	10.2684	0.162305
2017	130600	5.65732e+06	7730200	1.13661e+06	1111860	926640	654370	6579159	3813452	618350	7180123	471720000	4640000	310576800	12461000	39195	270720	23.6999	50.97	2.9159	10.2672	0.162305
2018	130600	5477381	7865100	1.13288e+06	1098160	918730	650110	7007223	3837237	822426	10504715	441987000	2973900	257666400	7760000	37908.8	335540	21.8803	52.54	2.85601	10.2995	0.162305
2019	130600	4840300	7103300	1.12912e+06	966190	787460	581940	7088569	3823255	901916	7890700	303311000	2828000	204756000	7288000	40454.2	409550	24.172	54.68	3.03771	10.3432	0.162305
2020	130600	5.4218e+06	8227900	1.12532e+06	1056440	869780	637810	8333046	4406847	1060489	8750314	393015000	2845000	172765200	6554000	40861.6	546810	23.4389	57.14	3.12894	10.3932	0.162305
2021	130600	5399000	8377700	1.12708e+06	1048950	861900	633410	8800415	4938478	920464	8593654	377385000	2917000	165511200	6283000	38283.8	595650	23.31	58.45	2.64303	10.5034	0.162305
2022	130600	5.42237e+06	8545500	1.13451e+06	1049600	859710	568940	9718836	5721415	973449	8988203	366711000	2968000	164197200	6054000	42958.8	764830	27.5531	59.08	3.03778	10.5467	0.162305
2023	130600	5.13713e+06	8791100	1.14079e+06	1061900	859470	550920	9733262	5737474	1160874	9669842	358507000	3019000	162883200	5825000	39087.3	824950	23.7993	60.34	2.69851	10.5927	0.162305
2008	130700	1310899	2712500	1.4268e+06	664580	441150	247460	2096680	933428	106762	1110899	98592000	2908000	118786800	3409000	29957	17560	17.9357	32.02	2.07496	9.6596	0.162305
2009	130700	813163	2793300	1.41893e+06	674820	455880	253790	2157014	940632	175052	1552291	93616000	3165000	109898400	3147000	29450	19200	19.1586	43.96	2.23307	9.75914	0.162305
2010	130700	1352694	2898500	1.40468e+06	690790	465050	251670	2723282	1273760	188110	1817320	98015000	3422000	101010000	2885000	32387.2	26450	19.9861	45.17	2.30525	9.93981	0.162305
2011	130700	1547020	2986600	1.39298e+06	693170	479130	278770	3216829	1451091	231480	2315155	101306000	4368000	90134400	2600000	30931.7	17160	18.4912	46.42	2.32382	10.083	0.162305
2012	130700	1277000	3059600	1.38424e+06	700700	475320	263830	3667604	1786043	306059	2665617	102996000	6388000	108096000	2924000	31291.6	69840	19.4714	47.63	2.27772	10.1787	0.162305
2013	130700	1419718	3160200	1.37798e+06	703060	469300	248890	4289148	2263830	367069	2948208	111401000	4593000	96234000	2889000	29989	122180	17.0548	48.95	1.99863	10.2473	0.162305
2014	130700	1394824	3281500	1.37198e+06	705370	467530	252240	4377951	2189765	417891	3297137	111520000	4790000	112093200	4233000	31719.1	143070	18.2288	50.1	2.26816	10.2677	0.162305
2015	130700	1434651	3406100	1.36189e+06	703160	474190	252550	4309299	2175484	479356	3902617	110342000	4958000	113697600	3265000	37249	166960	21.654	52.2	2.76379	10.2776	0.162305
2016	130700	1763344	2444700	1.35307e+06	698660	468860	258550	4650478	2384571	636216	4151921	113911000	4884000	68312400	3823000	34413.8	181750	20.1038	54.19	2.31776	10.3479	0.162305
2017	130700	1.77988e+06	2517700	1.35109e+06	718340	522980	257700	3637064	1809430	684111	4725763	106692000	5036800	68578800	3253000	37580.9	220800	23.1715	55.92	2.51626	10.3316	0.162305
2018	130700	1828387	2605100	1.35292e+06	670400	482170	259370	4036632	1950630	1234954	5602556	135194000	7865000	65694000	2992000	37914	246320	24.1377	57.24	2.67853	10.4056	0.162305
2019	130700	1796887	2730400	1.35468e+06	663660	468510	246350	4385056	2385109	1293417	6110403	135218000	7.56805e+06	55540200	2979000	36960.2	313170	22.2884	58.38	2.50507	10.415	0.162305
2020	130700	1.85463e+06	2791800	1.35968e+06	655880	449870	231840	4849303	2599366	1419032	6430738	129184000	7271100	45386400	2791000	40125.6	398040	22.1389	66.1	2.77963	10.4536	0.162305
2021	130700	1.86101e+06	2867300	1.37278e+06	663360	459000	272810	5055676	2835968	1063843	5353311	129229000	7594000	43882800	2788000	41797	438620	24.8263	67.12	3.0877	10.5382	0.162305
2022	130700	1.90835e+06	2992600	1.40272e+06	679850	459050	333950	5741526	3501924	955373	6087575	129399000	7560000	35985600	2913000	45429.3	417200	29.1937	67.48	3.32268	10.5672	0.162305
2023	130700	2.01183e+06	3077100	1.42907e+06	688800	470960	336090	5807534	3520717	1162831	6940043	131325000	8358000	33732000	2741000	42674.3	471430	25.3474	68.35	3.1525	10.6049	0.162305
2008	130800	1306429	2415700	532312	317030	243300	142840	1822755	848555	138798	1068293	99856000	1909000	167834400	1422000	29370.5	17330	18.1182	26.54	2.08003	9.87071	0.162305
2009	130800	869826	2755800	524126	335350	259190	144450	1915308	894790	161107	1177777	102378000	2077000	168058800	1434000	28011.5	33740	17.8375	35.76	2.15071	9.92516	0.162305
2010	130800	953400	3101100	515217	359670	283590	145480	2360777	1150742	202982	1559205	106123000	2245000	168283200	1446000	31682.6	6430	20.5423	32.34	2.15826	10.0789	0.162305
2011	130800	1010200	3296200	501729	368380	288670	195310	2807001	1389623	250954	1923582	108001000	2413000	168507600	1458000	28472.8	26220	16.5608	32.45	1.92819	10.2922	0.162305
2012	130800	1005200	3490300	485650	379110	291690	151810	3173011	1640010	332760	2357968	107950000	2581000	168732000	1470000	30841.9	57380	19.1991	32.53	2.22232	10.3533	0.162305
2013	130800	1125600	3707700	473572	382960	294500	108310	3643777	1965273	402485	2617543	111517000	2749000	168956400	1482000	32159.4	94570	19.4973	32.74	2.38239	10.4236	0.162305
2014	130800	968700	3900300	467223	388520	295490	116130	3902310	2140612	418333	2655455	113189000	2917000	169180800	1494000	34824.7	136030	21.1666	32.93	2.69269	10.4707	0.162305
2015	130800	969300	4077200	461412	397280	297640	122300	4020719	2242483	389703	2925360	113706000	2976000	170044800	1441000	33543.6	182630	19.7433	46.8	2.47038	10.4783	0.162305
2016	130800	1218400	2462400	457461	397920	289820	123580	4074783	2253705	475572	3037531	111572000	3178600	157963200	1354000	34854.3	196380	19.3553	49	2.57714	10.5337	0.162305
2017	130800	1.29333e+06	2533700	456479	367240	275850	136410	3632165	2074574	511774	3376382	108728000	3316600	155992800	1281000	37298.4	206860	21.967	50.7	2.50987	10.5601	0.162305
2018	130800	1400509	2581700	453703	374430	276130	139980	4080564	2498733	771725	3771658	104324000	3243900	142207200	1187000	39174.8	269260	24.3914	52.07	2.65237	10.5657	0.162305
2019	130800	1446244	2635900	440329	386230	280500	142300	4560989	2611238	741388	4218239	100438000	3244800	139292400	1114000	39405.6	321400	22.0327	53.26	2.85348	10.556	0.162305
2020	130800	1.46532e+06	2717900	428728	397710	283930	145420	5177659	2933604	761757	4491623	98140000	3307200	128598000	1103000	41833.7	405320	23.4244	55	3.14233	10.6136	0.162305
2021	130800	1.46661e+06	2778200	425592	401530	285230	141460	5763655	3530095	737016	4211650	95752000	3427000	127891200	1085000	37636.3	437410	24.0442	58	2.72165	10.7094	0.162305
2022	130800	1.48994e+06	2921500	438749	404380	285310	86610	6454764	4054698	690083	4363601	93152000	3519000	126026400	1060000	45635.6	562530	25.4086	58.07	3.47527	10.7572	0.162305
2023	130800	1.48704e+06	3018900	451267	409510	285310	87170	6596265	4107005	646631	4696114	90515000	3532000	126222000	1043000	38426.2	626450	24.5489	59.12	2.77878	10.7939	0.162305
2008	130900	4308520	11139100	1.34873e+06	1098050	832020	567160	3652158	1951374	121802	1249898	311704000	8363000	601573200	13934000	27479.1	72070	18.0881	30.26	2.04551	10.0928	0.162305
2009	130900	4508200	11446200	1.3423e+06	1100070	841570	520720	3912880	2173552	184139	1575413	311685000	8092000	489087600	13635000	30958.8	62120	19.6732	30.25	2.26633	10.1308	0.162305
2010	130900	4757042	11747600	1.33547e+06	1135920	883030	525460	2871797	1798751	237174	2131343	322954000	8657000	528058800	11855000	27570.2	96820	17.7479	31.14	2.07274	10.3137	0.162305
2011	130900	4942676	11977200	1.32847e+06	1158690	902390	627980	5353072	2899808	271310	2643500	319173000	8463000	577051200	11301000	30170.1	107670	18.2579	31.21	2.18771	10.4683	0.162305
2012	130900	4836584	12153300	1.3197e+06	1151730	898270	542380	5755030	3143466	287256	3115744	316608000	8273000	545679600	10620000	32436.3	137700	18.0053	31.14	2.29957	10.5396	0.162305
2013	130900	4773678	12462800	1.30718e+06	1135520	885810	456780	6257163	3355022	398145	3524113	316685000	8372000	541633200	10130000	35722.3	172730	22.6639	31.5	2.56405	10.5952	0.162305
2014	130900	4491121	12650400	1.29253e+06	1131390	890790	485110	6463566	3283355	454747	3812703	320305000	7678000	544496400	9735000	34783.6	184490	22.973	31.58	2.33684	10.6159	0.162305
2015	130900	4446149	12938500	1.27458e+06	1100770	900190	498180	6388019	3241231	644542	4848296	315431000	6975000	548920800	10008000	33127.5	262370	18.648	48.56	2.35161	10.6662	0.162305
2016	130900	4555387	9963900	1.25235e+06	1097770	892940	502780	6259392	2951948	718777	5048978	310318000	6572700	440366400	9419000	35854.5	277090	21.9061	50.56	2.59604	10.7242	0.162305
2017	130900	4.47682e+06	10279700	1.2387e+06	1024760	904810	503230	5409131	2364363	677286	5504803	305688000	6271000	452678640	9065000	35239.1	312700	20.0081	52.31	2.58217	10.7543	0.162305
2018	130900	4344627	10296700	1.23536e+06	985990	894910	507390	5693732	2439507	731537	6222522	289952000	3927700	443349600	6285000	34812.7	344570	21.4604	53.64	2.38949	10.7569	0.162305
2019	130900	4.51863e+06	10416200	1.23196e+06	984750	900760	503820	6050611	2467619	837303	6863022	273424000	3505800	462244800	5723000	42069.5	393090	26.4767	54.91	3.10808	10.7275	0.162305
2020	130900	4578840	10573100	1.22896e+06	970450	884480	504230	6562315	2609670	977454	7350504	263453000	3408100	287232000	5357000	41482.7	532600	24.6317	51.14	2.89366	10.762	0.162305
2021	130900	4.65965e+06	10744700	1.22833e+06	982450	899160	509310	6971409	2807217	721435	6687661	249245000	3265500	276979200	5157000	39363.3	571870	25.2655	52.29	2.7138	10.8838	0.162305
2022	130900	4.71623e+06	10850500	1.22925e+06	986730	902220	518790	7689640	3256039	730642	7098189	242689000	3039500	270170400	5046000	39340.1	770690	23.8514	52.84	2.90519	10.9364	0.162305
2023	130900	4670001	11107600	1.23017e+06	986330	903070	523890	7880825	3276364	797168	7309162	237949000	2993000	265761600	4952000	40189.5	924410	25.7958	54.14	2.77075	10.941	0.162305
2008	131000	1778446	6555500	611614	496160	306770	280630	2450680	1425088	81674	1065480	165973000	6495000	127641600	4524000	28235	35100	16.7399	29.83	2.13347	10.1564	0.162305
2009	131000	1875542	6661500	605779	496330	311610	278190	2530171	1560320	185044	1321476	166437000	6224000	126520800	4337000	30149.2	49730	17.409	31.09	2.17161	10.2314	0.162305
2010	131000	1924460	6737400	599158	496530	317800	276620	4546113	2522698	187124	1796396	166662000	5953000	125400000	4150000	28156.6	54210	16.1507	29.36	2.00787	10.3811	0.162305
2011	131000	1936719	6777700	592442	498780	318190	315080	3213022	1861751	191410	2279461	167130000	5682000	124279200	3963000	30373.4	58400	19.7184	30.09	2.19209	10.5434	0.162305
2012	131000	1847291	6838700	584468	496030	313290	272720	3624384	2222014	242124	2680378	167921000	5411000	123158400	3776000	30799.1	87550	19.8378	31.34	2.19868	10.6315	0.162305
2013	131000	1759531	6890700	574095	480560	300040	230360	3688823	2280276	402485	2924316	166914000	5140000	122037600	3589000	31078	114000	18.6318	39.53	2.08096	10.7364	0.162305
2014	131000	1698413	6948800	564660	477830	306170	229260	3812904	2296746	374860	3025103	169265000	4869000	120916800	3402000	34245.9	104700	19.4881	33.23	2.40802	10.7854	0.162305
2015	131000	1606679	6986300	555527	468940	308680	230490	3811856	2309298	560964	4819446	167235000	4598000	119796000	3215000	33672.6	125010	21.2051	55	2.59426	10.8902	0.162305
2016	131000	1594517	3930200	544651	451180	300290	227310	3667346	2309121	655857	5089037	163842000	4327000	118675200	3028000	37146.6	187020	23.8525	55.78	2.58216	10.9609	0.162305
2017	131000	1.57446e+06	3932700	537227	423840	307490	227350	2939197	2081144	510073	5827035	161000000	4056000	117554400	2841000	39456.4	120970	24.7843	58.5	2.86991	11.015	0.162305
2018	131000	1474213	3932800	534824	400930	290120	227530	3051891	2157539	604513	6202225	140409000	3621000	108591600	2468000	38022.4	153070	22.3837	60.01	2.57176	11.0804	0.162305
2019	131000	1477521	3906400	533300	386550	279980	227530	3290887	2266108	622903	6397682	135767000	3414900	107750400	2300000	40655.4	226710	23.006	61.29	2.76919	11.1	0.162305
2020	131000	1.48105e+06	3933600	532210	375360	268940	227530	3427960	2364450	562075	6518910	126193000	3275400	28843200	2201000	39548.2	321200	23.3042	64.84	2.7277	11.121	0.162305
2021	131000	1.50728e+06	3978600	531887	372980	270280	226810	3336989	2356302	527562	6424899	121334000	3312000	26877600	2075000	41852.1	244080	26.666	65.89	2.94198	11.1834	0.162305
2022	131000	1.53081e+06	4015000	532480	372280	272630	198890	3541020	2518696	433211	6050582	120020000	3301100	27006000	2036000	44981.2	279600	26.0237	66.01	3.43398	11.1827	0.162305
2023	131000	1.41229e+06	4065200	533188	370380	272200	198890	3346825	2273091	554845	5954637	120347000	3047000	25672800	2062000	42730.5	317930	27.2257	66.8	3.00373	11.1839	0.162305
2008	131100	3351225	8111600	875865	833050	563880	479150	2104323	1252664	71730	667767	250047000	9783000	282099600	9423000	25548.5	33310	14.4674	22.68	1.86564	9.59249	0.162305
2009	131100	3437708	8673600	873791	840600	575480	476490	2350622	1416517	118944	904115	257317000	10119000	314404800	9331000	28253.8	30390	16.7612	37.67	2.12922	9.61229	0.162305
2010	131100	3610302	9008000	871087	850170	593950	477720	2915146	1861044	140621	1120991	267107000	10136000	223549200	9470000	31255.4	46760	19.7112	39.23	2.35825	9.78474	0.162305
2011	131100	3786219	9123400	867830	854670	595360	478070	3318734	2059140	166245	1374187	272366000	10215000	219655200	9102000	29137.1	51770	19.1917	40.33	1.94741	9.95412	0.162305
2012	131100	3789080	9389900	863256	852690	594610	477040	3606385	2202375	171106	1575171	276909000	10474000	276404400	9599000	33701.6	78340	18.8585	41.39	2.56062	10.0368	0.162305
2013	131100	3722895	9535500	856719	846130	588370	476010	4209402	2592800	250228	1855649	279625000	10261000	297369600	9277000	35015.1	106090	22.0513	42.91	2.44685	10.0823	0.162305
2014	131100	3641105	9615800	849579	844300	591210	481420	4235499	2548060	560056	2343659	283415000	10318000	297181200	9210000	36026.1	123760	21.9375	44.14	2.78431	10.1421	0.162305
2015	131100	3520883	9784100	842380	814070	575780	480470	4050442	2360354	559672	2689296	287656000	9693000	300145200	8755000	34783.7	179370	21.8322	46.64	2.67857	10.2027	0.162305
2016	131100	3627468	7446400	835024	805320	584820	481110	4302293	2499689	504526	3002534	283256000	9117000	295042800	8611000	35804.2	232350	23.481	48.89	2.58421	10.3486	0.162305
2017	131100	4.28974e+06	7930300	829716	897700	718780	479320	3621983	2254974	492109	2982886	277302000	8654600	302468400	8220000	34854.6	238520	19.2789	50.6	2.63132	10.4208	0.162305
2018	131100	4138993	8258200	827413	869620	710790	478690	3773364	2345395	539584	3592082	325565000	7363400	290636400	7371000	39379.5	290900	21.7182	52.06	2.79288	10.4394	0.162305
2019	131100	4253911	8382800	825824	861090	711890	479690	4072010	2417028	582564	3942764	312623000	7059400	278804400	6842000	40850	346430	26.6389	53.22	3.00456	10.4	0.162305
2020	131100	4.36489e+06	8658800	824150	866020	718650	481390	4434238	2583678	685847	4198530	296392000	6745000	253089000	6447000	38265.1	463690	21.9129	54.74	2.57532	10.4348	0.162305
2021	131100	4.41138e+06	8905400	823262	867280	723680	481390	4494669	2739997	598319	3954105	290187000	6680000	227373600	6258000	42052.6	496570	25.2988	55.81	2.8308	10.5214	0.162305
2022	131100	4.45328e+06	9081500	823291	858870	724470	489500	4970819	3054441	582288	4219111	285025000	6314000	225081600	6064000	38489	708710	24.2751	56.34	2.84895	10.5752	0.162305
2023	131100	4.38207e+06	9310000	823428	855090	724910	489500	4921812	2971743	696433	4403376	279341000	6047000	222256800	5851000	42935.2	728130	25.8298	57.42	2.89022	10.62	0.162305
2008	140100	306066	1161756	162393	115730	85200	50025	399589	230210	69696	1528553	26626000	1900000	15456000	776000	20099.8	5330	11.4071	82	1.46467	10.6153	0.351345
2009	140100	318536	1194132	160040	115160	85478.8	48600	503058	302028	72661	1599051	27273500	1849200	15969480	760100	17827.1	470	10.2851	82.22	1.24283	10.653	0.351345
2010	140100	321585	1.20293e+06	157831	113550	84781.4	49240	560634	336794	88095	1896358	26469800	1767700	15664920	739900	21573.7	1890	11.9306	82.54	1.45817	10.7923	0.351345
2011	140100	316043	1.23156e+06	155852	110040	82236.5	45260	631630	379376	112358	2393147	27655000	1956000	16491600	854000	20941.7	7370	12.9802	83.35	1.44064	10.9506	0.351345
2012	140100	319481	1284007	152587	108090	81768.2	48140	674966	404721	182077	2774437	29054000	2028000	16720800	859000	20442.9	11180	11.4368	83.76	1.5373	11.0539	0.351345
2013	140100	327786	1.33606e+06	149353	107180	80481.5	51020	722383	434021	175671	3191090	28966000	2209000	16962000	851000	19469.9	12660	11.4176	84.12	1.36394	11.0922	0.351345
2014	140100	338981	1.37901e+06	146448	101940	76122	50260	760400	450781	119362	3226934	29036810	2412540	17582424	878670	18931.5	15880	11.0907	84.25	1.39398	11.1341	0.351345
2015	140100	299327	1.40016e+06	144158	90350	75570.5	49500	739124	428567	155176	4199913	28966730	2324990	17959452	872590	24724	15350	13.7395	84.4	1.63933	11.2179	0.351345
2016	140100	312869	557304	141067	98120	73435.4	48740	767905	438166	210352	4240666	28719190	2336900	17823744	863060	24043.3	17610	13.7824	84.55	1.83902	11.2883	0.351345
2017	140100	320963	436656	137531	84860	71342.7	47980	794015	451016	232883	4790558	28281210	2304990	17172708	844370	24038.9	26780	13.7269	84.7	1.64798	11.4258	0.351345
2018	140100	292283	462068	134944	82530	65960.4	47220	795895	472363	276351	5424589	25527270	2388100	15331080	640100	20843.5	32530	11.5949	84.87	1.48118	11.5428	0.351345
2019	140100	224230	490996	132934	81550	62918.4	47070	573503	298794	316761	6105530	23104600	2211800	13055880	492400	27552.3	32940	16.2032	85.25	1.92532	11.561	0.351345
2020	140100	245320	511653	131072	82260	63497	44500	672356	345695	326569	6473448	22396310	2158400	11334240	430900	28239.5	48010	16.0237	89.06	2.19066	11.5771	0.351345
2021	140100	250600	527000	130919	80440	63795	42790	754579	396706	316245	6289857	21820350	2037000	10262280	384300	28474.5	39410	17.6266	89.23	2.1641	11.7728	0.351345
2022	140100	257644	538090	133307	81150	64026	42060	806239	393679	289254	7158959	21379570	1910800	9451560	365800	25459.4	65610	16.3842	89.34	1.87984	11.8442	0.351345
2023	140100	260663	556406	135625	82700	64206	42290	773950	400592	311795	7772629	21258690	1.7846e+06	8.64084e+06	347300	29072.1	66950	17.9966	89.34	2.20952	11.8327	0.351345
2008	140200	600700	1448203	629914	312430	261660	119230	528967	225821	73600	992903	75000000	3.09981e+06	3.57881e+07	2.36166e+06	16442.8	9400	10.8277	51.14	1.26679	9.81232	0.351345
2009	140200	429900	1511526	628431	300540	251740	119010	555390	201432	90200	1111142	71665800	3.00055e+06	3.5998e+07	2.51027e+06	19787.3	6320	11.2827	51.95	1.35965	9.84654	0.351345
2010	140200	653800	1605533	624370	309390	265850	124550	639061	314054	122400	1327751	81246100	3.11536e+06	3.62078e+07	2.65888e+06	20549.9	11670	12.0828	54.91	1.4093	9.99505	0.351345
2011	140200	766400	1670353	618672	307680	264980	126080	801534	375941	141000	1692081	82959000	2.9164e+06	3.64176e+07	2.80749e+06	21387.2	28520	13.9111	56.49	1.62143	10.1831	0.351345
2012	140200	852200	1760522	613332	312260	269460	130110	871494	416960	157200	1865565	88358000	3.20599e+06	3.66275e+07	2.9561e+06	19850.5	44350	11.1058	57.95	1.47628	10.2806	0.351345
2013	140200	899300	1850348	606325	310260	267490	134140	957931	485827	199600	2340574	90603000	3.22539e+06	3.65779e+07	3.01987e+06	20386.5	45060	13.1876	59.03	1.37512	10.2634	0.351345
2014	140200	910100	1927927	600163	313910	272450	139360	1010635	500453	199200	2217880	87989080	3.3162e+06	3.60771e+07	3.04953e+06	19986.6	50780	11.2656	60.04	1.31949	10.2932	0.351345
2015	140200	947800	1968368	593458	312170	276360	148000	985564	461776	280000	2908030	82502120	3.1671e+06	3.50065e+07	3.03301e+06	25407.4	50340	15.5439	61.02	1.85027	10.4137	0.351345
2016	140200	970400	1081000	587327	312130	276530	149890	1017683	475856	338100	2858886	81251750	3.18748e+06	3.42527e+07	2.9833e+06	20160.1	54670	12.0401	62.01	1.38953	10.3815	0.351345
2017	140200	985900	963911	581100	318360	273470	150330	1052057	485290	398200	3255052	75481650	3.10506e+06	3.34753e+07	2.82103e+06	23091.5	66450	12.9845	62.94	1.60215	10.4705	0.351345
2018	140200	1066300	1013230	574600	328430	273260	150330	1085941	511843	578400	3339906	78167900	3.03941e+06	3.23215e+07	2.59027e+06	20725.3	74080	11.997	63.97	1.41123	10.5966	0.351345
2019	140200	1231900	1088387	567429	330110	283530	150630	1181366	526841	565900	3633627	78777000	3.00875e+06	3.06378e+07	2.44861e+06	24490.1	118630	13.5156	65.62	1.80175	10.6329	0.351345
2020	140200	1236600	1153260	564589	319480	278440	150990	1443138	609431	566700	3881752	78595910	3.00688e+06	3.00322e+07	2.39353e+06	22068	185670	14.0141	72.69	1.5716	10.674	0.351345
2021	140200	1255000	1208600	568526	328720	280340	150860	1659202	724767	389700	3741810	79897000	3.00055e+06	2.98569e+07	2.27534e+06	22346.9	253060	12.4079	73.38	1.69536	10.8847	0.351345
2022	140200	1274400	1279502	581252	332790	281270	199650	1732111	740478	418300	4008564	80908840	3.09981e+06	2.92932e+07	2.22799e+06	25055.6	235240	15.2681	73.71	1.75193	10.9737	0.351345
2023	140200	1298200	1388113	592793	335920	282280	147260	1.83744e+06	826413	555400	4645991	84191590	3.11536e+06	2.93233e+07	2.14181e+06	22815.9	273380	12.6683	74.4	1.73094	10.9859	0.351345
2008	140300	197300	1188824	76145.8	55800	50100	7550	95813.8	53677	21600	404239	13000000	314540	4.24236e+06	254900	17166.9	1510	10.9214	58.48	1.19061	10.0866	0.351345
2009	140300	190500	1211726	74977.7	56600	50200	8700	108655	61052.9	28100	488775	13397900	359638	4083720	280600	18689.9	1510	11.1753	59.11	1.39724	10.195	0.351345
2010	140300	172900	1215156	72307.4	58900	52800	8720	124072	70249.5	37900	600659	13786200	312523	3925080	306300	16839.5	1410	10.1911	60.01	1.19346	10.3992	0.351345
2011	140300	238400	1260063	69011.1	58990	56300	8130	157224	86733.4	50000	717030	13524000	325316	3808200	222000	19812.4	10370	13.1594	61.61	1.48274	10.6014	0.351345
2012	140300	263500	1304251	65715	58590	57200	8250	169332	101564	58600	884080	12825000	272000	3613200	240000	22995	16740	15.2355	63.04	1.67211	10.727	0.351345
2013	140300	265800	1335545	62774.1	58900	56400	8370	189895	109618	57200	864555	13723000	309000	3404400	260000	23265	18720	15.0726	64.01	1.79704	10.7387	0.351345
2014	140300	259800	1364798	60672.5	58348	56800	8900	205650	114590	54900	869075	13853530	306000	2835600	238000	19715.4	18260	12.7575	64.96	1.38168	10.7427	0.351345
2015	140300	229200	1374827	59534.4	57796	55800	8900	185501	91508.8	75800	1007101	14692160	275000	2792400	229000	19825.6	16330	11.1043	65.86	1.36971	10.7161	0.351345
2016	140300	225100	421257	58903.6	57244	53800	8970	189559	96707.5	69900	957303	14451770	285000	2658000	233000	26125.6	14980	15.02	66.68	1.8157	10.7543	0.351345
2017	140300	224800	330665	57751.7	56692	52500	8970	187141	96016.1	68300	1060561	15099550	233000	2535600	215000	24198.1	18790	15.9139	67.56	1.66596	10.8378	0.351345
2018	140300	234500	340799	55453.8	56140	53800	8970	191046	97729	94900	1239346	15081600	205100	2488680	198800	20978.3	19190	13.5222	68.49	1.59205	10.9256	0.351345
2019	140300	207800	347717	52829	55220	53300	8970	203364	89150.4	86500	1322650	14654100	280122	2390280	176600	24236	27040	14.6704	69.48	1.67685	10.9054	0.351345
2020	140300	231000	364054	51198.3	56850	54800	8970	230403	101471	103300	1546127	14519110	272672	2326320	170400	24341.7	31130	14.2909	70.5	1.7952	10.9407	0.351345
2021	140300	232600	376900	50194.8	57140	54900	8970	364933	112816	77500	1278901	14393000	264916	2231880	179500	22411.2	34390	13.2052	71.93	1.63064	11.1563	0.351345
2022	140300	237000	386916	50187.9	57490	55100	8700	275218	121007	116700	1584747	13584440	267652	2215320	178300	23235	31790	14.667	72.29	1.71416	11.2558	0.351345
2023	140300	238300	402758	50793.2	58050	55400	6540	301348	130392	133200	1682091	13605140	266938	2198760	177100	22881.6	38680	13.4824	73.01	1.66486	11.2473	0.351345
2008	140400	1424739	1485549	656684	284210	257350	70050	629869	398648	99400	971493	111917000	5.96103e+06	2.6261e+07	2.43979e+06	17705.2	3080	10.5736	40.45	1.34318	9.94438	0.351345
2009	140400	1153478	1601621	650678	281500	256581	73700	581321	361782	118500	1126539	113179500	5.41946e+06	2.59799e+07	2.58575e+06	16317.4	2480	10.6073	41.04	1.2145	10.0656	0.351345
2010	140400	1.43046e+06	1761951	642161	280130	255474	75290	686424	452422	153300	1358657	110137400	4.87789e+06	2.56988e+07	2.73171e+06	16703.1	2360	10.3003	41.84	1.19474	10.2312	0.351345
2011	140400	1.48498e+06	1860160	634137	282210	257010	81390	830304	540883	209700	1760325	114236000	4.33632e+06	25417704	2.87767e+06	21634.7	33060	14.0092	43.43	1.63365	10.5038	0.351345
2012	140400	1.59017e+06	1985221	627343	279230	253886	83400	938115	597959	218100	2018665	118897000	3794750	2.51366e+07	3.02363e+06	20305.5	44910	12.7487	45.31	1.46421	10.5848	0.351345
2013	140400	1.60821e+06	2087811	622389	275800	250310	85410	986462	620409	259800	2458799	125729000	3.25318e+06	2.48555e+07	3.09988e+06	22619.2	47760	14.5857	46.87	1.56872	10.5812	0.351345
2014	140400	1.62192e+06	2170775	619775	273680	247780	87724	1.06089e+06	674249	285400	2440202	125645410	2711610	24574440	3.14918e+06	23619.7	57280	14.6364	48.46	1.59053	10.5775	0.351345
2015	140400	1.56996e+06	2220151	617704	272020	246310	90038	1.06205e+06	651054	321700	2415636	126547970	2170040	24293352	3.15692e+06	21279.2	57070	13.559	50.02	1.47869	10.4769	0.351345
2016	140400	1.61713e+06	1243346	615890	273440	242852	92352	1.12435e+06	688013	326500	2343437	125374520	2124640	25136592	3.12838e+06	21235.2	58970	12.2391	51.53	1.55842	10.5315	0.351345
2017	140400	1.63105e+06	1066767	613346	277330	239181	94666	1.15496e+06	710717	339600	2684289	122511650	2126420	24772416	2.97757e+06	24901.7	71060	16.0914	52.93	1.9177	10.6854	0.351345
2018	140400	1.50242e+06	1151280	609412	258430	235734	96980	1.1766e+06	695924	438300	3237265	111613070	2066810	23840244	2.7472e+06	27387.4	74320	17.4589	53.96	2.0316	10.7902	0.351345
2019	140400	1.07361e+06	1217108	605857	283850	252675	97180	955359	504611	433900	3545092	109682500	2137800	22612320	2.61443e+06	21998.7	96270	14.0973	54.88	1.57322	10.7838	0.351345
2020	140400	1.21226e+06	1294736	599799	290990	254473	97180	1.28645e+06	654816	482800	3960786	108657390	2122100	22017840	2.5428e+06	24347.7	151390	15.3408	56.47	1.82766	10.8283	0.351345
2021	140400	1221188	1339300	596073	300720	254895	97180	1481943	771743	366800	3881466	106948000	2106840	21808452	2.38559e+06	22607	181330	13.6011	57.39	1.58252	11.1298	0.351345
2022	140400	1241689	1399787	597929	305510	255802	85440	1521405	805990	441400	4918085	104423230	2086340	20794872	2.29191e+06	25971.6	191350	17.1001	57.96	1.86839	11.3235	0.351345
2023	140400	1251936	1472372	601043	305850	257472	89140	1.60452e+06	866690	603200	5726231	104282250	2065840	1.97813e+07	2.17161e+06	23081.5	204410	13.8866	59.12	1.61573	11.3236	0.351345
2008	140500	793300	2020091	332446	204730	193130	40990	397679	199254	67400	632928	68000000	1.14446e+06	1.95639e+07	1.30322e+06	15653.6	6900	9.27246	45.23	1.04574	10.0778	0.351345
2009	140500	601500	2122485	330572	198070	187730	41090	435429	202259	87100	764896	69970000	1.27189e+06	1.93976e+07	1.35873e+06	18614.4	7280	11.5168	47.03	1.31365	10.2396	0.351345
2010	140500	743900	2.25259e+06	327658	204400	193730	42050	516501	266536	109300	895069	68776300	1.39933e+06	1.92313e+07	1.41424e+06	16637.4	2120	9.65691	51.04	1.21424	10.4278	0.351345
2011	140500	799400	2.34003e+06	323882	205600	194930	39156	633139	286309	133500	1132373	70774000	1.52677e+06	1.90651e+07	1.46975e+06	19774.4	21110	12.7829	52.75	1.39524	10.6249	0.351345
2012	140500	836300	2401700	316463	201330	190530	41900	697576	337390	166300	1298261	71375000	1.65421e+06	1.88988e+07	1.52527e+06	22905.2	28330	14.3348	54.48	1.69798	10.7454	0.351345
2013	140500	794400	2448759	307879	199670	188330	44644	719015	336422	186300	1573164	68730000	1.63778e+06	1.85735e+07	1.53343e+06	23906.2	35970	14.5862	55.52	1.58356	10.7591	0.351345
2014	140500	620900	2483885	300081	186000	174000	45280	729513	325877	191867	1617219	66517130	1.6581e+06	1.80385e+07	1.52476e+06	20799.9	38170	11.9277	56.49	1.45792	10.7647	0.351345
2015	140500	849000	2504848	295368	185070	174000	47707	841953	408819	161107	1801145	65906640	1.57629e+06	1.7423e+07	1.50955e+06	24168.5	35430	14.7529	57.42	1.86688	10.7665	0.351345
2016	140500	770300	1097000	292329	178470	167800	47980	842412	343342	219100	1728079	65152490	1.5865e+06	1.70485e+07	1.48487e+06	21069.2	36820	13.6774	58.34	1.46358	10.7726	0.351345
2017	140500	717900	585590	292098	174200	163330	48510	824708	367037	220300	1784121	59523040	1.5608e+06	1.68268e+07	1.41803e+06	22778.8	50560	13.7883	59.04	1.58594	10.861	0.351345
2018	140500	712300	598604	294341	176070	163400	48510	794320	380908	259000	2284586	60797280	1.55695e+06	1.65568e+07	1.32688e+06	23048.6	60110	15.2149	59.88	1.57527	11.0214	0.351345
2019	140500	621400	612981	298007	172530	158130	48233	887670	412299	304800	2525199	61913700	1.58016e+06	1.60906e+07	1.28598e+06	22411.6	81170	13.1294	60.79	1.66101	11.0192	0.351345
2020	140500	663700	634963	301160	175930	160400	48410	1086482	447984	312000	2840023	60698170	1.60392e+06	1.60197e+07	1.27675e+06	28820.1	110310	17.9339	62.72	2.13184	11.0703	0.351345
2021	140500	670500	650500	305382	180530	160730	48410	1.18844e+06	550923	271200	2921296	60084000	1.61174e+06	1.60376e+07	1.22219e+06	27614.1	120270	15.3343	63.55	2.0385	11.3636	0.351345
2022	140500	683500	680159	313678	180800	161400	19433	1.20511e+06	589626	345500	3867364	57754710	1.67284e+06	1.58084e+07	1.20235e+06	27728.1	130320	17.4282	64.03	2.0194	11.5505	0.351345
2023	140500	688000	699105	320616	181870	161990	78503.5	1252000	594505	348045	4312389	57442450	1.68496e+06	1.58597e+07	1.15841e+06	28193.7	168400	15.6562	65.04	2.08129	11.5609	0.351345
2008	140600	765102	1848327	607302	325900	251590	122000	547911	279276	72600	605317	71300000	2.00466e+06	3.47987e+07	2.303e+06	19056.4	12960	11.7278	44.89	1.41502	10.207	0.351345
2009	140600	721842	1944501	602930	324990	260836	122020	634391	307306	75700	721488	69016700	2.26946e+06	3.485e+07	2.43351e+06	15743.6	3200	9.10091	45.24	1.18955	10.482	0.351345
2010	140600	897313	2.06134e+06	598988	331700	265860	120450	720355	377919	101100	901318	69090400	2.53426e+06	3.49012e+07	2.56402e+06	21635.8	2410	12.7478	46.28	1.58797	10.6485	0.351345
2011	140600	971210	2145387	593782	337720	269776	111460	883881	467572	121229	1154207	71256000	2.79906e+06	3.49525e+07	2.69454e+06	21945.2	12260	12.4521	47.87	1.51621	10.8107	0.351345
2012	140600	1.07005e+06	2231217	586142	335100	268386	123680	1047457	568163	152698	1388666	74440000	3.06387e+06	3.50037e+07	2.82505e+06	18822.7	19970	11.8168	50.02	1.42731	10.969	0.351345
2013	140600	1.17641e+06	2329972	574774	345300	273497	135900	1.27942e+06	693918	200085	1544659	84956000	3.05755e+06	3.46745e+07	2.86273e+06	18601.7	36850	11.4414	51.09	1.40884	10.9828	0.351345
2014	140600	1.28106e+06	2413760	567770	347440	275898	139648	1.32394e+06	700018	198989	1430634	86284640	3.13722e+06	3.41298e+07	2.88494e+06	20941.6	34460	13.6534	52.15	1.46855	10.9544	0.351345
2015	140600	1099692	2061000	561081	328300	268092	143396	1.19065e+06	520537	234020	1382931	86358020	2.99432e+06	3.30967e+07	2.86754e+06	19035.2	33370	12.4213	53.16	1.27584	10.9294	0.351345
2016	140600	1.27029e+06	1443000	554807	327970	265202	147144	1.21284e+06	532980	179674	1276607	77603510	3.01099e+06	3.23561e+07	2.81812e+06	25479.4	45810	15.389	54.21	1.76119	10.9389	0.351345
2017	140600	1134114	1252240	549772	333900	268223	150892	1.21069e+06	563641	6652	1417217	70239520	2.93766e+06	3.16705e+07	2.66894e+06	22579.6	71130	14.6609	55.29	1.53719	10.9983	0.351345
2018	140600	1.22871e+06	1310656	545329	337400	268766	154640	1.23943e+06	576117	246134	1738833	73848160	2.88458e+06	3.0675e+07	2.45832e+06	25710.1	83110	16.9887	56.31	1.90815	11.0879	0.351345
2019	140600	1.25995e+06	1.3872e+06	539477	341120	278987	154640	1.10776e+06	545345	575620	1929168	72267600	2.86054e+06	2.91286e+07	2.32799e+06	25270.7	92560	16.107	57.51	1.79925	11.0784	0.351345
2020	140600	1.24254e+06	1485813	536186	334060	272911	154650	1397200	700987	317946	1982824	70468400	2.85561e+06	2.85214e+07	2.27312e+06	24227.3	132080	15.9752	62.53	1.72233	11.1197	0.351345
2021	140600	1258436	1546600	536101	331030	274738	154650	1570135	761109	269760	2074132	68700000	2.82941e+06	2.81541e+07	2.14557e+06	29293.6	214690	17.0294	62.74	1.94174	11.3819	0.351345
2022	140600	1267789	1607026	541051	334190	275451	165570	1642000	794760	350179	2483037	66694700	2.88542e+06	2.72672e+07	2.07389e+06	27491.2	222560	17.0176	63.23	2.13439	11.4597	0.351345
2023	140600	1289603	1727267	545958	339490	275963	165560	1.73033e+06	811802	348045	2924664	70535450	2.86922e+06	2.70065e+07	1.97259e+06	29908.5	257960	17.3868	64.26	1.9825	11.4579	0.351345
2008	140700	1334053	2845169	548770	335190	282950	137175	736226	433606	81700	856795	94000000	3319000	33796800	1894000	16094.7	8130	9.59567	42.67	1.153	9.79038	0.351345
2009	140700	1383395	3029837	544203	338620	289510	140500	960437	535803	104891	1032386	99676800	3431000	34088400	2030000	18710.4	6850	10.3476	43.48	1.28552	9.89849	0.351345
2010	140700	1505183	3211152	541132	334520	288690	141110	1105470	664885	140712	1205394	103116400	3655000	38120400	1997000	18522.8	1390	11.4049	44.12	1.40629	10.0774	0.351345
2011	140700	1583306	3340254	538768	329230	283640	134710	1270779	752106	179665	1522113	105792000	3960000	41322000	2309000	18459.3	17390	12.1167	45.74	1.22446	10.2232	0.351345
2012	140700	1695001	3499195	533534	323040	277770	144460	1445237	861970	190592	1786407	112202000	3958000	42271200	2272000	21730	36430	12.8857	47.41	1.46078	10.3207	0.351345
2013	140700	1823924	3634348	531019	322130	273040	154210	1620111	1000233	245743	2136333	110603000	4045000	40527600	2045000	23386.7	38730	14.8281	48.87	1.79084	10.3395	0.351345
2014	140700	1921863	3746922	532854	313970	265670	157250	1790012	1143409	212940	2164411	103368410	4503000	41138400	2123000	19394.2	60580	12.5366	50.45	1.42521	10.358	0.351345
2015	140700	1757848	3812226	534532	307020	262470	160290	1820491	1121712	275578	2411647	102785740	4556000	40269600	2152000	21225.9	57160	13.9469	51.72	1.44469	10.3651	0.351345
2016	140700	1844217	1934817	532294	302300	256780	163330	1906301	1184934	335493	2471699	102697160	4392000	39669600	2209000	22936.5	60630	13.1041	52.93	1.73284	10.4002	0.351345
2017	140700	1760677	1.61145e+06	525206	280500	252190	166370	1972081	1225784	417614	2789258	101505430	4347000	39343200	2166000	21888.3	76820	12.4469	54.14	1.57061	10.5637	0.351345
2018	140700	1542445	1672993	520489	283090	249090	169410	1697551	1001451	461608	3226368	98311940	4207000	39745200	1963000	20614.1	93870	13.3513	55.37	1.53608	10.6769	0.351345
2019	140700	1454230	1759642	520658	281100	249850	168480	1763484	982344	514495	3710587	95903700	4305000	36727200	1893000	23485.2	122420	13.5982	56.84	1.61995	10.6824	0.351345
2020	140700	1503906	1.85964e+06	523646	286470	251190	168630	2163588	1076119	554683	4001461	95731470	4076000	36494400	1799000	24404.9	142170	16.0852	60	1.85688	10.6885	0.351345
2021	140700	1492038	1945700	526736	287800	251550	166930	2370400	1176535	416341	3668171	95022000	3933000	35714400	1735000	28244.9	184390	17.1464	60.91	2.16203	10.9159	0.351345
2022	140700	1537957	2.03593e+06	536604	290490	252610	176570	2453513	1241378	443020	4140721	95171810	3799000	34958400	1745000	26765.6	209700	15.091	61.43	1.95413	11.0486	0.351345
2023	140700	1545558	2.09616e+06	544192	292290	254360	159630	2.49253e+06	1.27198e+06	571359	4395022	94359230	3665000	34202400	1755000	28837.8	217410	17.5063	62.52	2.20741	11.0371	0.351345
2008	140800	1983100	5334608	1.08359e+06	756400	522600	319400	1521800	1164100	98600	930775	255200000	3.47012e+06	6.12163e+07	4.02396e+06	19276.8	7410	12.559	35.23	1.47478	9.53572	0.351345
2009	140800	1980400	5708649	1.08186e+06	807100	591200	329900	1906800	1469000	120900	1032560	260151600	4.00526e+06	6.19372e+07	4.3113e+06	16287.5	4520	9.30729	36.64	1.25154	9.57194	0.351345
2010	140800	2302400	6052977	1.07976e+06	825400	614700	330710	2398300	1907400	167100	1348055	273956900	4.54039e+06	6.26581e+07	4.59864e+06	17235.6	8710	10.5673	37.56	1.20026	9.70673	0.351345
2011	140800	2405800	6296445	1.0767e+06	727000	620300	364470	2821200	2185100	226000	1541989	287941000	5.07552e+06	6.3379e+07	4.88598e+06	19840.6	29620	12.0281	39.51	1.3293	9.88732	0.351345
2012	140800	2591900	6584975	1.07336e+06	724500	626300	377940	3193300	2526900	262400	1927056	294058000	5.61065e+06	6.40999e+07	5.17332e+06	20497.8	45400	12.0056	41.41	1.49374	9.93162	0.351345
2013	140800	2780700	6857083	1.07092e+06	735200	644900	391410	3510300	2790000	330800	2293494	296636000	5.69683e+06	6.46056e+07	5.33384e+06	18466.3	76950	11.4263	43.06	1.34783	9.99079	0.351345
2014	140800	2676400	7084798	1.06871e+06	723400	634100	400714	3783500	2999500	364700	2387663	289270260	5.90515e+06	6.42423e+07	5.43029e+06	23769.9	83430	13.2005	44.45	1.8037	10.0381	0.351345
2015	140800	2755000	7215000	1.06601e+06	708300	631400	410018	3739000	2924000	447400	2769475	288038810	5.68895e+06	6.28809e+07	5.44808e+06	24921.6	81620	15.7096	46.12	1.84196	10.0437	0.351345
2016	140800	2630700	5.03264e+06	1.06299e+06	694700	617900	419322	3891300	3013100	416900	2878358	287117510	5.76897e+06	6.19933e+07	5.39943e+06	20355.4	81700	13.4509	47.65	1.46706	10.0441	0.351345
2017	140800	2714100	2.85028e+06	1.06055e+06	697300	612200	428626	4110300	3213200	410100	3030131	280371090	5.66699e+06	6.1095e+07	5.14861e+06	24862.2	105810	14.3862	48.94	1.87983	10.1677	0.351345
2018	140800	2525000	2970225	1.05893e+06	675900	577900	437930	4320900	3345200	487000	3378723	270708080	5.60133e+06	5.95652e+07	4.77361e+06	24067.7	123950	15.7481	50.2	1.76279	10.2897	0.351345
2019	140800	2654500	3060561	1.0561e+06	628800	532760	437930	4539200	3461300	543200	3741868	267080700	5.59992e+06	5.70234e+07	4.55737e+06	27086.4	136000	16.296	51.24	1.89687	10.3225	0.351345
2020	140800	2820500	3166240	1.05348e+06	636660	535700	437930	5415900	4103600	600000	4176614	263346500	5.61061e+06	5.60379e+07	4.46615e+06	27763.2	209460	16.682	51.24	1.8535	10.374	0.351345
2021	140800	2787500	3250000	1.05363e+06	647500	536620	437900	5848100	4362800	437200	3988230	255681000	5.5608e+06	5.53327e+07	4.2168e+06	22739.4	321180	14.7316	50.26	1.54871	10.5971	0.351345
2022	140800	2880800	3322187	1.05936e+06	646200	539010	411930	5983300	4520600	634700	4862812	249808040	5.64957e+06	5.33885e+07	4.06063e+06	28828.7	400210	17.0596	50.93	2.12286	10.7112	0.351345
2023	140800	2904700	3566284	1.06386e+06	658190	541130	433510	5909900	4383900	743000	5191726	245757790	5.59101e+06	5.26253e+07	3.84382e+06	23216.7	458020	15.0408	52.53	1.58122	10.7238	0.351345
2008	140900	1015253	1851333	786009	461980	407100	127210	584500	346086	90074	849595	105000000	2792000	4.43023e+07	749000	15611.5	8050	8.93914	36.71	1.07824	9.23634	0.351345
2009	140900	1068519	2001726	775389	466350	417200	127200	646700	351871	103276	1020222	107195000	2966000	4.42694e+07	827000	19099	2320	10.6629	37.52	1.39693	9.33974	0.351345
2010	140900	1144825	2161483	764571	470320	404200	129130	835800	519927	168102	1285794	126538700	3140000	4.42364e+07	905000	18508	4740	10.4368	37.86	1.36852	9.56268	0.351345
2011	140900	1294116	2259774	750941	473380	422530	127670	989000	618407	182716	1897561	132787000	3314000	4.42035e+07	977000	18772.1	32510	12.3797	39.8	1.34862	9.79159	0.351345
2012	140900	1382632	2367092	739643	476030	426430	129580	1017800	629573	224253	1815286	130237000	3405000	4.41706e+07	1006000	18847.2	50720	11.1968	41.43	1.30215	9.90501	0.351345
2013	140900	1408364	2496528	730833	475830	427210	131490	1119400	707427	298166	2134790	122728000	3675000	4.40891e+07	883000	20153.2	51680	11.7747	43.04	1.54309	9.95349	0.351345
2014	140900	1502788	2597030	728090	474310	425880	134254	1204200	773070	272007	2139521	124025170	4162000	4.3767e+07	942000	19339.5	67580	11.0841	44.66	1.30019	9.98833	0.351345
2015	140900	1355580	2689081	723563	471300	420400	137018	1034300	538302	315797	2406615	131130030	4535600	4.26811e+07	980800	20616.9	58540	12.5324	46.31	1.38375	10.009	0.351345
2016	140900	1536629	1.75495e+06	714675	466600	415000	139782	1054000	571991	353137	2475508	131947930	4675600	4.16795e+07	926600	25658	68190	15.9927	47.9	1.93175	10.0541	0.351345
2017	140900	1561140	1.49101e+06	701046	457700	392600	142546	1101700	614999	485775	2906549	124945220	5216300	4.0385e+07	954100	21470.2	77650	12.0484	49.44	1.45827	10.2539	0.351345
2018	140900	1676935	1603828	692271	446040	405100	145310	1169100	673191	654876	3137790	127623130	5109000	3.89405e+07	960000	21693.4	113130	14.088	50.95	1.44904	10.3771	0.351345
2019	140900	1.92763e+06	1.73139e+06	687131	467180	425560	145180	1391100	721098	686595	3709444	134361500	5360000	3.7101e+07	986000	27007.3	123060	16.3288	52.79	2.0222	10.3932	0.351345
2020	140900	1.94815e+06	1.84855e+06	685743	470770	428340	145180	1707100	881381	734138	4048335	140378110	5896000	3.64768e+07	977000	22902.4	175210	12.7762	53.78	1.62982	10.4289	0.351345
2021	140900	1960300	1946400	689139	476840	428870	146730	1884700	942690	613658	3935489	139992000	5937000	3.61911e+07	961000	27749.3	266810	16.1535	54.7	2.10734	10.6934	0.351345
2022	140900	2016952	2.03375e+06	701342	477750	429890	140680	1957800	1007392	610967	4335608	137264160	6001560	3.53454e+07	953240	28862.8	303890	18.7794	55.34	2.13227	10.8072	0.351345
2023	140900	2031368	2.13663e+06	712757	480320	430440	143800	2102200	1.12436e+06	772891	4557528	132747760	6066120	3.52574e+07	945480	28331.7	335920	16.4926	56.53	2.15157	10.7704	0.351345
2008	141000	1707000	3659700	784327	518580	467000	135450	946395	559295	105461	1094202	151000000	3187600	6.65297e+07	4.2412e+06	18640.4	9660	12.2206	37.44	1.38424	9.76833	0.351345
2009	141000	1667400	3855600	788272	525420	478880	138100	1008748	602250	120066	1320408	154125900	3183800	67345440	4.4126e+06	19832.2	5730	11.8853	38.25	1.43187	9.77263	0.351345
2010	141000	2073900	4050800	790078	524690	483730	137540	1216471	793005	154805	1597644	157473000	3180000	68161200	4584000	19706.5	12590	11.4236	40.78	1.33797	9.92106	0.351345
2011	141000	2146000	4231000	790636	529600	489300	134700	1358444	911332	219574	1871259	167043000	3577000	72210000	4822000	20644.2	50280	12.6383	42.39	1.48848	10.1587	0.351345
2012	141000	2222500	4399000	793174	525300	485900	140110	1482740	1008890	235108	2228232	170013000	3646000	73945200	5114000	18823.8	72280	11.5247	44.07	1.30029	10.2653	0.351345
2013	141000	2323500	4583900	798481	522920	486770	145520	1592507	1094938	324234	2652646	178394000	3650000	74511600	5160000	23633.8	89700	15.2073	45.67	1.59176	10.2629	0.351345
2014	141000	2757500	4730600	805538	535970	501610	146766	1774369	1257956	316913	2830807	182814000	3638000	73386000	5152000	20844.8	104960	11.5636	47.14	1.52161	10.2499	0.351345
2015	141000	2361700	2400600	808681	537420	506190	148012	1683254	1138238	383837	2875251	173959000	3014000	69966000	5149000	23641.5	105110	13.6283	48.62	1.77624	10.2023	0.351345
2016	141000	2274700	2483700	807961	536620	505620	149258	1768842	1178029	420491	3109586	176417000	3034000	68242800	4963000	22133.7	112720	14.3646	50.03	1.68013	10.2317	0.351345
2017	141000	2228000	1999000	805155	537390	503730	150504	1750714	1160689	498509	3343427	166240000	2645000	66198000	4218000	20643.4	136700	12.161	51.4	1.57822	10.3252	0.351345
2018	141000	2238600	2081400	804853	543160	507990	151750	1736114	1172148	596489	3859235	163082000	2476000	63884400	3976000	22608	163220	14.643	52.54	1.72274	10.412	0.351345
2019	141000	2006500	2168500	807604	532220	498680	151750	1874750	1210617	585067	4112039	159505000	2300000	61330800	3640000	23673	196580	15.5013	53.56	1.68479	10.4256	0.351345
2020	141000	2126800	2251600	808864	537500	500110	151810	2306382	1486692	616414	4393625	155951000	2232000	60176400	3431000	23567.1	218210	15.2325	53.17	1.68108	10.4631	0.351345
2021	141000	2111000	2316900	817956	542060	501180	151900	2510389	1677784	425824	4118735	149065000	2100000	57830400	3266000	27475.8	258640	16.601	54.15	1.93197	10.7032	0.351345
2022	141000	2188200	2417500	844442	546580	504490	152820	2617535	1769784	590485	5024612	148542000	2149000	57463200	3198000	23290.7	283780	13.021	54.77	1.76315	10.8601	0.351345
2023	141000	2210000	2501300	864641	550960	505650	160130	2.93678e+06	2.05965e+06	673118	5441050	149109380	2198000	57096000	3130000	28052.5	292010	16.9494	55.91	1.97252	10.8985	0.351345
2008	141100	819248	2255448	773618	397620	339860	107710	494298	262746	97800	1013922	63000000	1622000	14270400	1473000	15303.2	4160	8.48741	35.8	1.13158	9.72423	0.351345
2009	141100	894159	2368584	751556	409640	357437	112580	647940	306553	128900	1217730	57586400	1573000	14168400	1392000	19002.1	760	12.1166	36.63	1.41792	9.68332	0.351345
2010	141100	1.04267e+06	2515783	726946	407700	358719	115360	774947	480402	151600	1510013	73072000	1524000	14066400	1311000	20375.3	8930	13.5387	37.91	1.4351	10.001	0.351345
2011	141100	1.06104e+06	2647635	702019	407830	357416	81560	879166	505995	213650	1657721	71700000	1475000	13964400	1230000	21018.1	16770	11.9394	39.71	1.56008	10.2768	0.351345
2012	141100	1.10549e+06	2743716	683690	401020	353927	91690	996935	581009	254890	2464733	81336000	1426000	13862400	1149000	19904.7	20360	11.3924	41.15	1.44115	10.3499	0.351345
2013	141100	1.15855e+06	2872578	675820	399300	352751	101820	1169182	706353	333826	2922924	89128000	1377000	13760400	1068000	22142.1	18650	13.8509	42.85	1.62498	10.3479	0.351345
2014	141100	1260469	2.96249e+06	676493	392575	357639	102982	1.26568e+06	733033	363195	2638085	87333260	1328000	13658400	987000	23767.1	42370	13.2003	44.41	1.61174	10.2467	0.351345
2015	141100	723770	3033029	668402	385850	354734	104144	1.01742e+06	472227	360851	2740137	84584570	1279000	13556400	906000	22456.4	55810	14.6713	46.12	1.56199	10.1132	0.351345
2016	141100	1.1158e+06	1442000	646198	379125	351429	105306	1.01694e+06	494318	415496	2758512	79986160	1230000	13454400	825000	24541	84080	16.0219	47.71	1.7219	10.1447	0.351345
2017	141100	994034	1.15547e+06	615331	372400	340557	106468	1078911	479296	497233	3153750	75785060	1181000	13352400	744000	25515.6	76300	14.5624	49.08	1.7847	10.4171	0.351345
2018	141100	1.22731e+06	1.20575e+06	597333	360810	331756	107630	1.12622e+06	435522	768542	4086166	71346840	1151000	12158400	675000	26462.4	104360	17.3571	50.31	2.00704	10.4926	0.351345
2019	141100	956320	1.31125e+06	599281	350830	329881	109130	1.23285e+06	525841	796953	4306614	66834200	1233000	12040800	675000	22359	122280	13.893	51.94	1.7191	10.5552	0.351345
2020	141100	1.01192e+06	1382138	609682	350550	330138	109130	1.5974e+06	583426	808991	4611397	63368390	1276870	11881944	657350	26106.1	148620	17.1363	53.31	1.95718	10.5748	0.351345
2021	141100	973285	1432500	620643	355280	330587	109130	1770786	721938	495675	4066994	64823000	1304000	11872800	676000	23255	190940	14.0215	54.28	1.57122	10.8749	0.351345
2022	141100	1056737	1.44184e+06	641230	354820	331435	109260	1816300	795782	602568	5520220	59205690	1364000	11670000	658000	27678.1	331730	18.1283	54.9	2.11405	11.0302	0.351345
2023	141100	1062003	1.48907e+06	656712	356090	332057	109260	1.84726e+06	780840	838867	6255500	58900700	1424000	11467200	640000	23743.1	375290	14.3158	56.1	1.6042	11.0076	0.351345
2008	150100	1194000	1850400	513859	441400	316400	190210	1.33155e+06	398838	196007	1331800	91840000	4641000	32997600	316000	6511.42	72350	4.32465	47.04	0.478923	10.98	0.380409
2009	150100	1195000	1946100	509147	443300	321350	193810	1.37776e+06	419964	176022	1651700	95154000	5341000	35836800	284000	8436.74	85020	5.34756	52.24	0.565995	11.1886	0.380409
2010	150100	1161000	2062300	505549	443360	321350	195570	1.6239e+06	464060	202601	1772800	106939000	5999000	41119200	291000	7793.13	107450	4.60012	47.95	0.553548	11.3056	0.380409
2011	150100	1175000	2187100	502234	445360	323330	192920	1.95079e+06	530735	222559	2556700	111230800	6138000	42373200	312670	5623	146330	3.14284	63.79	0.374646	11.4481	0.380409
2012	150100	1219000	2261400	502234	444440	324950	199210	2.134e+06	615302	337270	2762900	115833000	6281000	42375600	362000	7854.2	190260	5.04096	65.21	0.571535	11.5852	0.380409
2013	150100	1369000	2364100	503586	449790	326670	205500	2.3506e+06	890556	346625	2929000	115552000	6589000	45620400	445000	7281.94	225040	4.53457	66.24	0.5033	11.6599	0.380409
2014	150100	1322000	2467300	507819	453710	328950	206540	2.23027e+06	773222	461818	3107900	119140000	7235000	49503600	463620	12240.2	248930	7.49343	67.49	0.913448	11.7089	0.380409
2015	150100	1302500	2589100	511184	461520	327880	210340	2.25277e+06	709657	443102	3606500	122702300	7769000	52519200	397320	11975.6	255690	7.59986	68.2	0.927164	11.7717	0.380409
2016	150100	1308200	2164900	513664	459560	312050	213200	1.99806e+06	788193	372593	4199700	126928000	8126000	55449600	457980	9911.49	264440	6.00134	69.08	0.749699	11.7882	0.380409
2017	150100	1423500	2261500	518388	472330	336400	212670	1.90165e+06	680748	312659	4030400	124958000	8486000	51435600	452220	9005.97	263000	5.35879	69.83	0.627064	11.7364	0.380409
2018	150100	1552800	2387000	524458	457520	338890	212670	1.89532e+06	759806	418022	3567400	129736000	9625000	53266800	442240	7636.34	294360	4.59195	69.82	0.541651	11.6787	0.380409
2019	150100	1713400	2494400	529015	435970	329550	212700	2.00219e+06	791815	341116	4179200	131217000	10167000	53769600	424320	8792.37	314910	5.11005	70.5	0.613431	11.627	0.380409
2020	150100	1740100	2617900	532098	420620	329780	212700	2233591	755161	451980	4385700	137803590	12111660	53824680	656400	7870.71	353220	4.42278	79.14	0.551749	11.6186	0.380409
2021	150100	1768100	2725500	539882	411210	330000	212670	2422554	805564	282214	4207500	136966620	12316000	60000000	665870	12413	436100	7.12213	79.68	0.867993	11.715	0.380409
2022	150100	1830900	2832000	555257	417060	334500	237705	2668617	956891	372233	4209800	131138840	11952000	60000000	652020	11357.1	386280	6.94488	79.8	0.872678	11.7678	0.380409
2023	150100	1892200	2953400	567381	435020	336810	262740	2785755	1030870	522094	5929700	139948490	12643000	50160000	594820	12673.5	442790	7.27162	80.7	0.886212	11.8955	0.380409
2008	150200	964000	1366200	283650	304600	216000	133830	915330	324563	99458	1531681	66924000	586368	1.12805e+07	778000	5587.77	41800	3.30193	75.9	0.386084	11.3	0.380409
2009	150200	1007500	1467200	281196	305810	220530	135720	967302	352450	129151	1955634	67089000	704436	1.22046e+07	771000	5447.79	30930	3.46549	77.9	0.359975	11.5005	0.380409
2010	150200	979800	1490300	281186	310070	225290	142260	1.18144e+06	364637	153203	2049617	66165000	822504	1.31287e+07	679000	9058.65	44700	5.16909	79.49	0.664359	11.6259	0.380409
2011	150200	998900	1506300	280774	312820	226670	161200	1.43011e+06	413289	214191	2512724	67020850	940572	1.40528e+07	706150	5808.23	64360	3.77976	80.5	0.41426	11.8167	0.380409
2012	150200	1010700	1553200	278724	312270	227800	144270	1596220	460129	302194	2911038	69648000	1.05864e+06	1.4977e+07	664000	11237.8	77920	6.33882	81.36	0.813933	11.9353	0.380409
2013	150200	1113200	1563100	277590	314480	228950	127340	1.7687e+06	584615	300424	3552582	75953000	1.16547e+06	1.52858e+07	717000	6575.99	64610	3.94135	82.01	0.442778	11.9556	0.380409
2014	150200	1094100	1606800	278308	335880	230320	127970	1.79637e+06	632897	321671	3546074	77268000	1.22537e+06	1.69637e+07	787000	7131.21	84620	4.59917	82.34	0.504222	11.9988	0.380409
2015	150200	1089100	1648000	279613	320700	223250	127640	1.80155e+06	617058	294377	3932680	77261500	1.32093e+06	1.82823e+07	827300	8444.4	75090	5.28141	82.65	0.633131	12.0213	0.380409
2016	150200	1092200	1159300	281023	330590	212310	128480	1.6936e+06	616394	296016	4143569	77188530	1.39097e+06	1.83949e+07	835200	11781.7	89330	6.9342	82.97	0.811164	12.0591	0.380409
2017	150200	1099800	1217900	284296	313100	211570	129770	1.56659e+06	581414	243772	3303194	71971120	1.47415e+06	1.67757e+07	819550	12656.9	76950	8.16289	83.28	0.879957	11.9331	0.380409
2018	150200	1084100	1291000	290494	272780	191110	129770	1.61975e+06	600707	347051	3645197	75699630	1.45803e+06	1.83053e+07	819550	9682.97	88850	6.3428	83.57	0.671438	11.7889	0.380409
2019	150200	1094700	1389400	299640	294730	193580	129800	1.70842e+06	638326	293557	3645308	75585430	1.5938e+06	1.83208e+07	827850	13382.4	98370	7.99483	83.9	1.02096	11.7004	0.380409
2020	150200	1127400	1463200	309296	308610	197110	129800	1882694	668303	277791	3793266	72398030	1.68005e+06	1.89021e+07	794620	9767.93	106730	6.20917	86.15	0.695169	11.7292	0.380409
2021	150200	1153600	1587200	317917	296460	199400	129770	2047803	724543	263210	3356633	71279030	1.81593e+06	1.97368e+07	786300	8393.13	121500	5.26883	86.73	0.587122	11.8982	0.380409
2022	150200	1178300	1676300	328240	290040	202900	229250	2238788	839900	297297	3952428	62452290	2.07082e+06	1.7708e+07	331210	9497.16	159960	5.84404	86.89	0.628376	12.0282	0.380409
2023	150200	1245500	1791600	337328	297530	203980	193170	2286539	856070	339571	4749991	62027370	2.36572e+06	1.73609e+07	326470	8569.3	165320	5.37942	87.56	0.599445	12.1565	0.380409
2008	150300	31900	78400	16193.8	7400	4600	10520	46363.5	22164.2	18142	314745	7388000	4.37463	646061	112000	5975.33	3720	3.58564	93.26	0.40113	10.8146	0.380409
2009	150300	32500	80400	16040.5	7580	4780	10860	51652.5	26482	31478	465197	4190000	4.61019	670078	85000	9655.8	3670	5.33348	94.05	0.650453	11.0784	0.380409
2010	150300	35000	77100	15495.2	7750	5030	8530	62769.8	29783.2	57577	632198	3987000	5.1519	694095	77000	7025.79	2420	4.3397	94.24	0.476425	11.2091	0.380409
2011	150300	35500	78700	14347.8	6360	4440	10370	73825.7	33782.8	74857	710757	3299400	48064	718112	21760	7252.57	2390	4.58821	94.44	0.531643	11.4	0.380409
2012	150300	38000	78100	13811.2	6690	4470	8530	82737	35339	106606	793094	3328000	52457	742129	23000	9340.76	2550	5.312	94.47	0.673724	11.5392	0.380409
2013	150300	41000	80400	13547	6850	4610	6690	88617.7	36838.4	84633	915199	3296000	56877.7	745982	29000	7383.17	3040	4.36933	94.59	0.550978	11.5434	0.380409
2014	150300	41000	84400	13289.6	7060	4650	6690	83610.4	33718.5	128429	945600	3618000	58513.1	810039	30000	11720.8	4160	6.66713	94.57	0.842285	11.5944	0.380409
2015	150300	41000	86700	13034	7060	4640	7060	83078.2	34805.5	108660	1062908	3734000	61574.6	852220	28500	9570.9	3080	5.6202	94.58	0.676579	11.7427	0.380409
2016	150300	41600	58600	12965.4	7150	4570	7060	86311.8	35051.4	192027	1290413	3780000	64174.4	848673	29200	12311.7	4910	7.89797	94.63	0.909618	11.7757	0.380409
2017	150300	40000	59600	13102.9	6810	4900	7060	88580.6	37500.2	80746	903911	3798500	67942.3	773176	29800	9046.74	5910	5.71348	94.74	0.645903	11.7067	0.380409
2018	150300	36200	62000	13321.4	5970	4340	7060	87985.3	33477	71295	1090389	3032020	66861.8	839438	25500	12817	5370	7.36811	94.98	0.944663	11.6326	0.380409
2019	150300	33200	63600	13796.8	5690	4210	7100	92219	34071.5	48075	1024309	2994560	73386.2	843578	24900	9452.09	5390	5.53915	95.2	0.72508	11.7379	0.380409
2020	150300	33400	65300	14692.4	5700	4330	7100	107521	44188	57533	1135024	2899720	79807.1	897901	24690	7712.36	6360	4.24731	95.37	0.583754	11.7594	0.380409
2021	150300	35300	69500	16212.5	5660	4600	7060	117964	48517	71830	1133334	2833140	92605.1	1.0065e+06	24650	12928.4	7110	7.45611	95.88	0.889742	12.0026	0.380409
2022	150300	37500	72100	17899.6	6120	4790	7475	134763	58537	60916	1189163	2909650	112926	953472	24690	10762.4	5540	5.97692	95.95	0.797467	12.1145	0.380409
2023	150300	42200	73200	18899.5	6630	5380	7890	136742	59519	58372	1720228	2594710	132545	972678	24210	13199.8	7650	7.61261	96.38	0.908417	11.9963	0.380409
2008	150400	3306400	3951300	1.963e+06	1051200	829800	413670	2.40872e+06	1193762	189975	1525347	243510000	8.2652e+06	249120	1605000	9451.57	154640	5.29406	24.64	0.663977	9.71003	0.380409
2009	150400	2961600	4174900	1.94479e+06	1062310	860280	443370	2.48939e+06	1218828	267331	1871101	241337000	9.0758e+06	2.00411e+07	1616000	7809.23	194070	4.40305	25.07	0.556487	9.89749	0.380409
2010	150400	3403000	4340000	1.93865e+06	1078210	875080	455050	2.97191e+06	1653569	323901	2197648	260551000	9.8864e+06	3.9833e+07	3577000	9428.26	184480	6.16206	23.92	0.677835	10.0745	0.380409
2011	150400	4357500	4609500	1.93686e+06	1103470	893330	518860	3.50164e+06	1904488	434503	2721928	257942150	10697000	5.9625e+07	2048680	7549.08	187210	4.88919	24.11	0.506174	10.2851	0.380409
2012	150400	4818900	4921600	1.94054e+06	1110970	897800	462370	3954968	2121431	512012	3256223	282334000	1.15076e+07	7.9417e+07	2563000	10072.7	245800	5.65201	24.41	0.717751	10.4349	0.380409
2013	150400	5446100	5278000	1.95186e+06	1119090	902290	405880	4.36974e+06	2566790	560647	3477996	324206000	12318200	9.92089e+07	2853000	10334.3	373470	6.02139	24.53	0.77369	10.5	0.380409
2014	150400	5481700	5658900	1.97127e+06	1149980	907700	406880	4.56408e+06	2850218	636025	3604389	346042000	13128800	1.19001e+08	3626000	9954.96	424850	5.69253	24.56	0.76393	10.55	0.380409
2015	150400	5673000	6087200	1.99714e+06	1187540	921590	412290	4.62097e+06	2762624	758014	4150346	347877000	1.39394e+07	1.38793e+08	4046140	9745.59	441470	6.27143	29.76	0.745209	10.6024	0.380409
2016	150400	5480800	4705000	2.02747e+06	1266600	933780	413670	4.97821e+06	2703171	735418	4388482	358338580	14750000	158584800	4230200	8262.73	428810	4.91989	30.82	0.618518	10.6396	0.380409
2017	150400	5522000	4973700	2.07911e+06	1409400	1075480	415830	4.70887e+06	2790252	745319	4625060	351285900	15560600	178376760	4359750	12483.1	411280	7.76229	30.86	0.878601	10.5417	0.380409
2018	150400	5947100	5403000	2.12228e+06	1381300	1086920	415830	5.15929e+06	2815585	1029928	5376819	303807570	15905000	198218400	2512360	7196.92	458710	4.62719	30.89	0.495512	10.4272	0.380409
2019	150400	6051900	5833300	2.14816e+06	1417560	1104710	415800	5.476e+06	2995921	1052995	5452234	296800600	15692000	196170000	2389230	9778.27	484980	6.28937	30.98	0.733788	10.5222	0.380409
2020	150400	6116900	6304600	2.18031e+06	1422080	1112330	415900	5923994	3200323	1069085	6144794	268154940	16880000	203797200	2244920	12740.3	606570	7.65461	53.1	0.918525	10.5604	0.380409
2021	150400	6247700	6768600	2.22787e+06	1371210	1122400	415830	6443171	3488425	979036	5716663	266950760	19675000	275122800	2231460	7464.64	814160	4.60201	53.7	0.519653	10.6806	0.380409
2022	150400	6560100	7533700	2.3068e+06	1371890	1134600	598095	7266224	4090330	1005888	5732379	263318020	24465000	197617200	2207240	13777	1162410	8.4657	54.64	0.948645	10.7645	0.380409
2023	150400	6500000	8263700	2.37993e+06	1382650	1137890	780360	7434564	4142694	1265696	6782607	256049220	29255000	200337600	2105600	7621.32	1299670	4.6986	55.57	0.53056	10.7871	0.380409
2008	150500	5030000	5023100	2.92842e+06	1078300	864400	623960	2.41843e+06	1.33114e+06	157811	1208961	439757000	3141000	142365600	5027000	10110.1	173560	6.08056	37	0.762391	10.061	0.380409
2009	150500	4752500	5153200	2.94451e+06	1092560	897240	278530	2.49529e+06	1.35442e+06	234653	1523410	574479000	3914000	178586400	6053000	9649.99	169180	6.25654	39.94	0.684659	10.314	0.380409
2010	150500	5255000	5403700	2.96021e+06	1109550	913320	652540	2.98176e+06	1.63302e+06	292759	1844649	529843000	4148000	175248000	5777000	6529.37	232800	3.69726	39.28	0.467507	10.5165	0.380409
2011	150500	5655000	5500300	2.97621e+06	1127520	920910	670460	3.49724e+06	1.85415e+06	370303	2135185	532394570	4025000	164749200	6826940	8512	261650	5.51672	38.78	0.635205	10.7202	0.380409
2012	150500	6080000	5717500	2.99996e+06	1119950	925510	655340	3872095	2179737	474653	2555593	541868000	4939000	161222400	9442000	8416.47	292850	4.72342	38.95	0.639129	10.8762	0.380409
2013	150500	6630000	5983800	3.03606e+06	1128580	930130	640220	4.27566e+06	2.49135e+06	528027	2984019	568448000	4752000	159774000	6951000	7202.69	354840	4.0859	39.33	0.555167	10.9237	0.380409
2014	150500	6630500	6332500	3.06977e+06	1140790	934780	640320	4.49112e+06	2638755	533462	3182044	634671900	4353000	172347600	7975670	8428.21	379320	4.86609	38.86	0.581865	10.9865	0.380409
2015	150500	6902000	6768700	3.0927e+06	1174760	951650	644430	4.50771e+06	2.66914e+06	566874	3496271	659501920	4012000	170965200	8581000	7516.56	433570	4.41035	37.99	0.546396	10.9816	0.380409
2016	150500	6958100	5938900	3.1083e+06	1209000	964950	644430	4.46583e+06	2.45954e+06	535750	3580764	684403750	3884000	171278400	7775240	12509.9	477210	7.0157	30.21	0.873865	11.0204	0.380409
2017	150500	7508000	6157100	3.11606e+06	1510170	1267090	644430	4.43941e+06	2.42042e+06	444828	3169892	688869270	3989000	152685600	7857410	7696.12	486730	4.42129	48.56	0.564809	10.8482	0.380409
2018	150500	8164400	6370000	3.12516e+06	1467510	1226030	644430	4.52997e+06	2.64701e+06	736267	3753581	622027470	4001000	160328400	6795550	9633.3	556960	5.79135	49.43	0.709135	10.6259	0.380409
2019	150500	8486000	6580900	3.14026e+06	1477260	1232150	644400	4.70826e+06	2.85323e+06	748962	3814797	618772740	3739000	155755200	5754670	12162.5	706520	7.95342	50.15	0.869899	10.5958	0.380409
2020	150500	8648200	6869800	3.17363e+06	1502020	1234860	644400	5110208	3007833	764438	3859644	588675240	4279000	152467200	5424260	13926.9	793850	9.10012	50.02	1.01006	10.6069	0.380409
2021	150500	8983200	7052800	3.24202e+06	1469680	1240400	644430	5595017	3306626	722680	3763465	622706850	2898000	133305600	5756190	7484.22	1016840	4.86855	50.63	0.510434	10.7098	0.380409
2022	150500	9337600	7694200	3.37156e+06	1444620	1259000	790000	6296792	3847753	825461	4209694	536571360	2447000	122826000	5774880	8900.96	1335670	5.66751	51.02	0.612092	10.8115	0.380409
2023	150500	9450200	8373400	3.47438e+06	1447450	1262060	935570	6428045	3912286	1234066	5113020	498537700	1996000	117368400	5511120	7641.31	1407820	4.97073	51.9	0.521147	10.8411	0.380409
2008	150600	1310900	2446600	720161	372100	224300	200640	975996	437542	193197	1676779	149350000	1.43638e+06	2.7826e+07	5679000	6637.18	55100	3.93721	73.85	0.458463	11.5814	0.380409
2009	150600	1365100	2494800	716693	378770	233610	209330	1.0213e+06	458078	304220	2316345	280570000	1.74589e+06	3.03286e+07	3567500	6542.01	72810	3.92214	78.31	0.441372	11.8815	0.380409
2010	150600	1410000	2568800	710862	378950	233790	206710	1.19463e+06	564764	392175	3187910	98635000	2.0554e+06	3.28311e+07	1456000	6108.16	93220	3.66945	69.51	0.415224	12.0637	0.380409
2011	150600	1425400	2668700	705961	376640	239550	175530	1.40946e+06	628047	591128	4466232	102597000	2.36492e+06	3.53336e+07	1507210	9951.05	114300	5.76676	70.67	0.762566	12.2232	0.380409
2012	150600	1450400	2788200	704137	381500	240750	209130	1519826	707741	586327	4832535	111406800	2.67443e+06	3.78361e+07	1604000	10795.9	136820	6.89795	71.7	0.768191	12.3901	0.380409
2013	150600	1550500	2908500	713882	383210	241930	242730	1.6551e+06	756063	523391	5186990	105965000	2.99726e+06	3.93108e+07	1531000	9625.8	202230	6.29803	72.35	0.690871	12.4544	0.380409
2014	150600	1495500	3028200	736826	397600	243630	244300	1.71658e+06	812897	542183	5414263	114809000	3.2442e+06	4.49118e+07	1495000	9872.81	223560	6.15601	72.45	0.714931	12.4683	0.380409
2015	150600	1470000	3130900	766820	410840	246890	244300	1.69937e+06	810438	652606	5730546	121077000	3.62258e+06	5.01381e+07	1583600	10684.5	211440	6.13953	72.76	0.813619	12.5011	0.380409
2016	150600	1479500	2159500	792408	437150	251890	245920	1.82866e+06	1.02393e+06	544817	5616384	123684500	3.92217e+06	5.18687e+07	1573010	10775.1	220210	6.98475	73.07	0.729497	12.5349	0.380409
2017	150600	1451900	2253900	814893	482790	275730	245920	1.88345e+06	1.01849e+06	531336	4733742	138621310	4.22546e+06	4.80852e+07	1613600	11871.1	222440	7.5847	73.71	0.876847	12.4454	0.380409
2018	150600	1702300	2396000	843492	484430	301790	245920	1.98493e+06	1.10983e+06	662811	5868240	125367420	4.23359e+06	5.3152e+07	1461160	12363.8	251060	7.01537	74.49	0.865482	12.3558	0.380409
2019	150600	1898500	2537700	874924	467020	310850	245900	2.08423e+06	1.17428e+06	620235	6280722	116215870	4.65377e+06	5.34953e+07	1378960	10118.2	238900	6.62388	75.08	0.695787	12.3006	0.380409
2020	150600	1964400	2708700	899975	466870	316530	245900	2303082	1323835	671179	6636807	121416620	4.88854e+06	5.50004e+07	1480390	10866.3	273510	6.93015	77.44	0.746811	12.2776	0.380409
2021	150600	2010100	2760800	924924	456730	324900	245920	2520819	1441532	728479	7296491	208771840	5.28314e+06	5.74208e+07	1615700	13573.9	296600	8.7777	78.08	1.01506	12.5631	0.380409
2022	150600	2105200	2961400	968318	479280	332000	341845	3112392	1655675	856352	9936223	199059150	6.10899e+06	5.22391e+07	1538170	10653	359410	6.99926	78.1	0.765087	12.7312	0.380409
2023	150600	2177900	3255000	1.01187e+06	494970	336490	437770	3237493	1761495	1064048	11195007	198688570	7.0964e+06	5.20769e+07	1447580	13858.8	387760	8.96193	79.19	1.03636	12.764	0.380409
2008	150700	3871000	3345600	3.4153e+06	1521300	1279000	278840	2.3544e+06	1.23275e+06	149653	1658300	77231000	7.05759e+06	1.35632e+08	1166000	5534.86	189450	3.10909	66.8	0.421771	10.0527	0.380409
2009	150700	4502200	3420700	3.39617e+06	1535060	1307620	278840	2.51209e+06	1.33652e+06	196727	1805800	154580000	8.46384e+06	1.4658e+08	6313000	6760.72	226900	4.41291	66.74	0.495178	10.2638	0.380409
2010	150700	5076800	3588400	3.38189e+06	1537370	1308420	278840	2.98199e+06	1.6304e+06	277377	2079200	161965000	9.87009e+06	1.57528e+08	7719000	7162.35	218860	4.37122	70.56	0.509961	10.4445	0.380409
2011	150700	5353400	3694000	3.36615e+06	1578520	1324000	278840	3.50346e+06	1.89145e+06	422567	2549800	178418030	1.12763e+07	1.68477e+08	8218660	7888.4	259970	4.33968	66.2	0.582064	10.6539	0.380409
2012	150700	5791200	3811700	3.33914e+06	1585420	1330620	278840	3918847	2085969	441988	2942800	209239000	1.26826e+07	1.79425e+08	9892000	8328.44	264230	5.30895	69.98	0.608738	10.8226	0.380409
2013	150700	6240600	3958100	3.31437e+06	1596300	1337250	278840	4.31127e+06	2.40031e+06	525951	3140200	233659000	1.39155e+07	1.8251e+08	13403000	11292.3	682460	6.89425	70.38	0.760727	10.942	0.380409
2014	150700	6550100	4152300	3.30652e+06	1590360	1342600	278840	4.35778e+06	2.47454e+06	555946	3497100	267044400	1.45584e+07	2.01542e+08	8796000	8019.97	702500	5.17704	70.84	0.535251	10.9551	0.380409
2015	150700	6672500	4505300	3.30765e+06	1619250	1362020	278840	4.39598e+06	2.39099e+06	661762	3745400	272323550	1.56258e+07	2.16269e+08	9513610	7121.51	732310	4.41757	71.52	0.524481	11.0295	0.380409
2016	150700	6531200	4619800	3.30848e+06	1665860	1388910	278840	4.19607e+06	2.16705e+06	648618	4127300	270534700	1.63759e+07	2.16563e+08	9494900	8759.08	738370	5.09827	72.13	0.618712	11.0442	0.380409
2017	150700	6489200	4853100	3.30128e+06	1952730	1687020	278840	4.18634e+06	2.14219e+06	814250	4350500	260123800	1.71181e+07	1.94802e+08	9223300	10880.5	783140	6.08852	72.63	0.730876	10.9199	0.380409
2018	150700	7014000	5008000	3.28787e+06	1894250	1666700	364220	4.4492e+06	2.52718e+06	763889	4493400	265333450	1.65022e+07	2.07182e+08	8304790	11470.4	796330	7.06647	72.63	0.782861	10.7984	0.380409
2019	150700	6537100	5297300	3.27288e+06	1902410	1670010	330990	4.64734e+06	2.57563e+06	776555	4598000	263604450	1.74087e+07	2.00113e+08	7592650	13285.8	818840	8.75595	73.06	0.951299	10.7533	0.380409
2020	150700	6044600	5480900	3.26989e+06	1874550	1647510	330990	4953138	2424144	742047	4664300	246284850	1.77616e+07	1.99834e+08	6950760	11770.3	901810	6.61658	73.86	0.825435	10.7454	0.380409
2021	150700	6855000	5727600	3.29892e+06	1871340	1657700	330990	5584961	2881955	672606	4249500	298506680	1.88433e+07	2.04802e+08	9293310	10323.1	1006960	6.67095	74.76	0.692981	10.9004	0.380409
2022	150700	6516700	6603400	3.37652e+06	1878200	1639200	383400	6394816	3461984	797051	4725100	301792460	2.1302e+07	153356748	8469620	9090	1244400	5.12169	74.83	0.679111	11.0338	0.380409
2023	150700	6603100	6959200	3.4486e+06	1881850	1641250	390450	6517811	3489125	1437226	5763200	301015670	2.41855e+07	1.77485e+08	8569890	10539.7	1438220	6.81097	75.76	0.707526	11.0688	0.380409
2008	150800	1836000	3383900	1.28934e+06	508500	244000	594100	1.51201e+06	955109	152812	804596	217656000	2.58645e+06	90960000	1107000	9871.9	143710	6.46037	44.59	0.694108	10.0746	0.380409
2009	150800	1887500	3583400	1.30178e+06	515060	258670	595520	1.61185e+06	1.02228e+06	188100	1054775	233544000	3.20211e+06	90480000	1211000	7475.78	163970	4.78174	45.85	0.50513	10.2895	0.380409
2010	150800	1900500	3792000	1.31267e+06	518940	260050	597390	1.94946e+06	1.22561e+06	228153	1235282	246795000	3.81777e+06	90000000	1221000	8946.83	167750	5.30778	48.35	0.673056	10.3852	0.380409
2011	150800	1925000	4124700	1.32344e+06	530510	262000	536040	2.26971e+06	1.38294e+06	300609	1546565	244374880	4.43342e+06	89520000	1247010	6187.43	155170	4.09573	49.27	0.416238	10.5574	0.380409
2012	150800	1955200	4206200	1.32935e+06	551050	263410	594380	2491937	1424882	344904	1828092	240794000	5.04908e+06	89040000	1316000	7178.62	187310	4.19489	50.22	0.483128	10.682	0.380409
2013	150800	2155000	4494500	1.3279e+06	555480	264590	652720	2.69136e+06	1.52881e+06	337776	1922926	247946000	5.57525e+06	88560000	1344000	9901.36	207540	6.55988	51.47	0.753417	10.7271	0.380409
2014	150800	2155500	5062800	1.32318e+06	575500	266600	652720	2.82979e+06	1.65734e+06	407326	1938016	242932480	5.82586e+06	88080000	1463900	8498.83	234990	5.05066	52.57	0.626372	10.7908	0.380409
2015	150800	2149000	4851000	1.32165e+06	600890	270970	652720	2.77985e+06	1.60503e+06	507129	2294897	255997000	6.24369e+06	87600000	1485000	10857.9	227500	6.28524	53.43	0.758059	10.8356	0.380409
2016	150800	2182800	4807600	1.32132e+06	672500	282060	652720	2.69624e+06	1.46172e+06	497907	2360418	272512000	6.5401e+06	87120000	1519540	9604.94	221050	6.25572	54.17	0.65782	10.8649	0.380409
2017	150800	2398700	5063300	1.33108e+06	744510	333110	652720	2.70579e+06	1.3887e+06	516260	2464211	279077000	6.90205e+06	86640000	1552000	10062.2	245230	6.17216	54.86	0.689099	10.8132	0.380409
2018	150800	2619600	5343000	1.34334e+06	741880	358340	652720	3.14792e+06	1.63155e+06	508455	2667068	270697000	6.74241e+06	86160000	1521200	11988.3	257500	7.48286	54.86	0.841092	10.7522	0.380409
2019	150800	2642000	5603200	1.35893e+06	750810	359130	652700	3.43063e+06	1.73051e+06	560840	3053865	263478050	7.22821e+06	85680000	1458920	8577.38	283390	5.60727	55.6	0.612899	10.8255	0.380409
2020	150800	2761600	5821300	1.37336e+06	760360	360170	652700	3807968	2110480	568370	3061615	257412600	7.45992e+06	85200000	1393790	7930.43	333070	5.1712	59.97	0.610081	10.8301	0.380409
2021	150800	2810500	6068200	1.38667e+06	757920	362700	652720	4215905	2321302	520846	2690273	427109810	7.92061e+06	84720000	2080200	14540.5	446640	8.86826	60.6	1.07365	10.9535	0.380409
2022	150800	2908300	6400400	1.40683e+06	758710	371200	740160	4751053	2709350	615001	3073752	403789380	8.87548e+06	84240000	2016950	12482.1	530720	7.92274	60.78	0.957668	11.058	0.380409
2023	150800	2944300	6803400	1.42648e+06	763940	376840	827600	5016714	2958609	983770	3647315	382370810	1.00041e+07	83760000	1959120	14845.7	568280	9.05439	61.7	1.09619	11.1226	0.380409
2008	150900	1007000	1722300	708189	582500	449700	223560	1.40531e+06	613793	109313	905200	92786000	9068000	30651600	714000	6854.26	70180	4.30074	33.69	0.473491	9.6251	0.380409
2009	150900	520000	1806100	703438	583490	458400	230440	1.34539e+06	511392	159105	1139900	70033000	8756000	34299600	797000	6424.87	160600	4.01462	37.15	0.439301	9.75605	0.380409
2010	150900	792000	1887600	704706	595050	471230	237950	1.6179e+06	652024	207029	1400300	90277000	8444000	37947600	735000	8235.41	150250	5.2607	39.83	0.551643	9.89221	0.380409
2011	150900	784000	1966500	704354	603040	474830	339010	1.92134e+06	776088	302706	1863200	92626720	8132000	41595600	881980	7797.95	193710	4.36411	42.88	0.570054	10.0814	0.380409
2012	150900	807000	2032400	697162	619660	477200	254050	2101165	787503	365788	2337200	90388000	8504000	41106000	839000	7268.85	199610	4.51496	43.58	0.551792	10.2117	0.380409
2013	150900	1131000	2074000	691954	626290	479540	169090	2.30093e+06	964310	356276	2517800	87779000	7589000	41505600	918000	6665.91	230130	4.33014	44.32	0.49814	10.2898	0.380409
2014	150900	987000	2102200	696327	644970	483380	171380	2.30179e+06	1.04524e+06	388602	2950800	91649000	7924000	42883200	837700	10506.3	212290	5.96653	45.26	0.794745	10.3591	0.380409
2015	150900	1047000	2193200	707042	669060	488640	175040	2.29774e+06	1.06575e+06	563501	3182300	97472000	7981400	44178000	858200	6631.96	207280	4.23919	46.58	0.503152	10.4153	0.380409
2016	150900	1061000	1909600	719445	659760	482440	174770	2.23141e+06	1.05781e+06	409062	3033000	98360000	8586900	45294000	1068330	8416.68	202310	5.53483	47.85	0.608732	10.4419	0.380409
2017	150900	1047600	2004100	731026	728310	507570	168100	2.22559e+06	1.07778e+06	493990	3181100	99092000	9889000	44876400	913540	8808.1	199170	5.75723	49.01	0.588635	10.3518	0.380409
2018	150900	1121900	2138000	745725	684110	476380	164770	2.09326e+06	1.0302e+06	639608	3498100	90344730	7533000	39337200	785230	8177.55	227310	4.57178	49.74	0.604756	10.2475	0.380409
2019	150900	1241700	2314200	769349	676860	453730	164800	2.22636e+06	1.07817e+06	709682	3712100	85221870	9555000	36946800	798630	8351.14	242920	4.84391	50.77	0.560655	10.3102	0.380409
2020	150900	1258200	2411500	794913	662950	457560	161400	2406611	1021482	696034	3876300	79923350	9811000	38278800	769330	12697.5	283240	8.33741	59.69	0.911495	10.3428	0.380409
2021	150900	1268700	2513400	819489	662240	460300	149620	2596533	1088651	640642	3779600	76508650	10474000	36820800	598430	8763.58	318270	5.78079	60.81	0.607064	10.4412	0.380409
2022	150900	1195300	2688600	856396	688740	466700	190575	2918873	1291671	685013	3755200	73792120	16154000	37418400	608240	14565.2	366510	8.23684	60.95	1.07202	10.5714	0.380409
2023	150900	1310600	2846000	891136	706240	473070	231530	3068683	1426785	634932	4158300	72397190	17199000	37713600	594660	8947.52	400820	5.90212	61.94	0.619805	10.6426	0.380409
2008	210100	3586659	2763300	1.32325e+06	608562	479656	233250	2882605	1247626	207196	4067400	180765000	10536000	112358400	6.03397e+06	45715.6	19980	27.3335	69.5	3.44042	10.8987	0.259749
2009	210100	3446346	2890700	1.32203e+06	648297	508843	233030	3272703	1429032	269239	4758800	197000000	9933000	105559200	5.30098e+06	49162	262920	29.5059	71.48	3.35437	10.9949	0.259749
2010	210100	2914046	2958000	1.31886e+06	600788	506848	240600	3597487	1604623	264102	5166200	194731000	9330000	98760000	4567990	52792.8	36010	31.6317	63.58	3.56029	11.1523	0.259749
2011	210100	4060586	3128000	1.31368e+06	670774	507413	264200	3941103	1784157	295954	6392900	200148000	8727000	91960800	3835000	54354.8	278710	33.2203	73.21	3.79212	11.3127	0.259749
2012	210100	4006863	3263300	1.30569e+06	667424	503291	260870	4231733	1903789	387865	7660900	200482000	9100000	89377200	3976000	53428.2	136280	33.8929	63.45	3.9649	11.4197	0.259749
2013	210100	3835053	3436300	1.29769e+06	629255	515445	257540	4545392	2043409	448434	8812800	207041000	9473000	86793600	4117000	55753.5	190500	35.2608	63.53	3.94375	11.4973	0.259749
2014	210100	3599160	3551400	1.29198e+06	647911	485079	255880	4838070	2113487	492532	9143700	210424940	8657000	87572400	4080000	60066.6	148170	38.7447	75.99	4.33854	11.4839	0.259749
2015	210100	3692359	3746300	1.28495e+06	652720	501958	261740	5235788	2275499	478931	8085800	208686700	8400000	87300000	4013000	57180.8	187210	33.5385	91.43	3.89947	11.5086	0.259749
2016	210100	3817919	3458800	1.27764e+06	669608	508308	262460	4985375	2275753	539557	8253900	204820230	8314000	85134000	3843000	64529.1	241650	39.8657	91.01	4.40454	11.2327	0.259749
2017	210100	3.82292e+06	3710000	1.27215e+06	669172	543507	264610	5047682	2340721	555055	8550200	203315790	7811000	87204000	3723000	65675.9	239960	37.7487	90.73	4.95795	11.2707	0.259749
2018	210100	3.69071e+06	3809400	1.27003e+06	677859	547239	267130	5258638	2442261	589443	9654400	203414450	7942000	87283200	3733000	64221.8	324250	36.4988	81	4.61668	11.3427	0.259749
2019	210100	4.18303e+06	3914000	1.26804e+06	680486	545985	269650	5727157	2663980	640965	10476500	199549000	7673000	84160800	3627000	70759.9	384680	42.6698	81	4.97971	11.3572	0.259749
2020	210100	4094285	4288900	1.26709e+06	676285	540446	272170	6097573	2869508	648798	10740500	191133000	7717000	82371600	3494000	69310.2	554480	38.431	84.5	5.18899	11.3669	0.259749
2021	210100	4185767	4323800	1.27013e+06	676524	542323	274690	6572513	3048186	563728	10325000	184959430	7749000	80608800	3378000	70454.4	642920	46.0387	84.97	4.80547	11.4591	0.259749
2022	210100	3927095	4489300	1.27518e+06	678571	544348	277210	6737701	3066075	573939	10535900	183891000	7585000	78846000	3368000	71202.5	829800	46.4337	84.99	4.89908	11.5189	0.259749
2023	210100	4195747	4804000	1.27751e+06	680503	546287	279730	6715128	3081236	725857	10840600	182897000	7237000	77956800	3334000	71933.2	942400	47.005	85.12	4.90633	11.5674	0.259749
2008	210200	1614000	3152345	793411	335220	283770	107170	5204456	1333263	216105	4100000	151200000	3145000	270068400	11931000	26412.8	9310	16.2151	60.1	1.99832	11.0995	0.259749
2009	210200	1534000	3230100	788885	335800	286700	110340	5705809	1504624	285834	4711600	166000000	3209000	292014000	11474000	27211.2	6490	15.0995	61.26	1.87495	11.2169	0.259749
2010	210200	1493000	3305100	784059	332800	282900	110340	6290488	1658685	349591	6114400	161000000	3803000	293037600	12121000	27904.1	5470	18.0307	62.42	1.94437	11.3846	0.259749
2011	210200	1639000	3.41914e+06	779199	330520	281030	160310	7220303	1902844	443116	7349400	160000000	4292000	289575600	12225000	31081.4	24880	18.7281	63.58	2.38051	11.5571	0.259749
2012	210200	1575000	3.56489e+06	774120	328000	277810	114690	8235942	2216147	564409	8909600	161900000	4933000	289010400	12628000	31724.7	51270	19.4237	64.74	2.36702	11.6838	0.259749
2013	210200	1604100	3.67052e+06	765485	329050	276590	69070	8723558	2338938	704978	10835400	166600000	4897000	291220800	12663000	34396.1	93870	19.8816	65.9	2.48423	11.7702	0.259749
2014	210200	1101700	3.78332e+06	754769	322860	272280	72500	8800166	2123311	409811	9894600	165300000	4770000	294775200	12613000	32613.3	145990	21.0004	67.05	2.35074	11.7661	0.259749
2015	210200	932100	3.89531e+06	734924	321130	267850	73600	9278916	2381758	593255	9106900	161700000	4768000	292760400	12318000	34066.3	216720	19.1326	71.03	2.54489	11.7773	0.259749
2016	210200	1330800	2475449	713508	326970	270800	74710	9.54544e+06	2.78747e+06	587768	8702800	156800000	4660000	276061200	10324000	38467.1	238840	24.9627	75	2.70073	11.6463	0.259749
2017	210200	1330300	2.37705e+06	700377	308810	260460	75760	8.43136e+06	2.27315e+06	479305	9198400	156900000	4571000	270752400	10414000	36647.9	252990	22.7989	72	2.44204	11.674	0.259749
2018	210200	1107800	2336302	696830	316970	264610	74090	8741000	2555000	410048	10014900	151000000	4928000	186039600	9960000	40630.4	268900	24.45	78.3	3.067	11.7667	0.259749
2019	210200	1182600	2.35829e+06	693227	313440	262760	72420	9.24737e+06	2.78546e+06	432619	10162800	151000000	4708000	177984000	9481000	39568.7	314000	24.2179	64.63	2.84767	11.669	0.259749
2020	210200	1284600	2405377	691469	321700	267730	70750	9.16612e+06	2.7969e+06	421548	10019800	142500000	4925000	182708400	9051000	36773.7	340550	22.6143	82.35	2.69548	11.6689	0.259749
2021	210200	1329000	2450305	695732	327800	268590	69080	1.02159e+07	3.07941e+06	370157	9800500	140300000	5177000	181752000	8461000	44482.4	341200	25.6409	82.65	3.08769	11.772	0.259749
2022	210200	1359600	2501063	707236	330390	269390	67410	1.11438e+07	3.30664e+06	394620	9910800	136300000	5497000	173684400	8207000	42325.5	428170	24.3265	82.85	2.82256	11.8382	0.259749
2023	210200	1379900	2555874	714497	332630	270140	65740	1.17189e+07	3.45763e+06	396649	10135000	132600000	5817000	161739600	8061000	45416.1	523650	26.1791	82.93	3.1525	11.8698	0.259749
2008	210300	1440000	1.50071e+06	445163	248370	209050	87380	1350063	565501	71573	1564864	88700000	2249000	3900000	495000	28592.2	14310	18.3841	50.42	2.01774	10.731	0.259749
2009	210300	1383000	1.50071e+06	444737	251300	212100	86080	1524524	635070	89697	1778665	91000000	2209000	3799200	481000	29062.6	35870	17.144	50.43	2.05714	10.8028	0.259749
2010	210300	1036000	1.50071e+06	443681	251800	210500	88690	1699067	714683	116571	2019010	93000000	2169000	3698400	467000	27229	35090	16.5889	67.17	1.95164	11.0088	0.259749
2011	210300	1456000	1.50071e+06	441796	254140	212450	110430	2026535	884157	118942	2320676	94100000	2129000	3597600	453000	32706.2	42870	19.2148	50.17	2.38624	11.1306	0.259749
2012	210300	1303700	1.50071e+06	439694	253660	212160	91590	2304834	1039219	198288	2902652	95500000	2089000	3496800	439000	31303.6	57800	17.9614	48.56	2.39279	11.1466	0.259749
2013	210300	1404400	1.50071e+06	436879	250250	208920	72750	2446503	1089281	209870	3253879	95000000	2049000	3396000	425000	32946	72030	21.3275	48.45	2.23068	11.2251	0.259749
2014	210300	1181800	1.50071e+06	435713	252410	211260	74380	2464700	1073744	156793	3254078	96900000	2009000	3295200	411000	33064.5	77260	21.6943	74.67	2.54577	11.1349	0.259749
2015	210300	1366400	1.50071e+06	434410	253540	213300	74410	2.5601e+06	1141985	158814	2444766	106300000	1969000	3194400	397000	36907.7	98880	22.5436	75.29	2.83703	11.1204	0.259749
2016	210300	1395100	1.50071e+06	433533	247710	210050	74440	1740471	908948	182393	2499227	106700000	1929000	3093600	383000	36231.8	106960	20.5501	75.27	2.56409	10.6514	0.259749
2017	210300	1442800	1.50071e+06	432284	254030	219130	74450	1619166	826099	183300	2738412	107300000	1889000	2992800	369000	35241.9	128250	21.046	75.58	2.60992	10.7556	0.259749
2018	210300	1321900	1.50071e+06	430808	254440	218540	74450	1712539	871703	197774	2773957	105700000	1849000	2892000	355000	39847.8	151870	25.1924	75.97	2.88169	10.8435	0.259749
2019	210300	1418000	1.50071e+06	426850	254490	218780	74450	1859853	925320	243945	3269833	105700000	1809000	2791200	341000	39888.5	214990	25.3909	72.9	2.94522	10.8459	0.259749
2020	210300	1360600	1.50071e+06	422631	249400	213020	74450	1959353	943716	255840	3480341	100900000	1769000	2690400	327000	40624.4	284200	23.0238	74.6	2.68828	10.8528	0.259749
2021	210300	1366400	1480136	422031	257900	213720	74450	2143111	1061568	232020	2911314	99200000	1729000	2589600	313000	41820.7	333110	25.0803	75.04	3.06417	10.9455	0.259749
2022	210300	1366600	1.50071e+06	427092	255310	214440	74450	2164716	1064997	243731	3074880	99100000	1689000	2488800	299000	39944.9	346690	24.074	75.05	3.00136	10.9382	0.259749
2023	210300	1394300	1.50071e+06	432005	257000	215940	74450	2223794	1097645	268904	3104600	98900000	1649000	2388000	285000	42698.5	391940	25.6067	75.81	3.12849	11.0185	0.259749
2008	210400	607000	476900	203835	115390	97880	42500	849939	323064	55323	881129	31600000	952000	12066000	1785000	30092.7	2380	19.1632	65.99	2.15912	10.2982	0.259749
2009	210400	520000	538900	200902	115900	98600	42500	915906	343079	82595	1181225	32000000	892000	11701200	1729000	27671.4	16430	15.4327	65.77	2.11668	10.3541	0.259749
2010	210400	523000	595600	196631	115900	98400	43500	1075429	413854	110934	1502536	33000000	832000	11336400	1673000	29926.4	12070	17.6657	71.66	2.04395	10.6096	0.259749
2011	210400	672000	652300	191499	118420	98790	60920	1379421	562613	118973	1653299	34100000	772000	10971600	1617000	33753.8	19100	20.5459	65.65	2.24143	10.8314	0.259749
2012	210400	673100	733300	187776	117760	98610	47300	1665560	654870	176043	2002015	34200000	712000	10606800	1561000	33138.8	31910	21.7076	68.32	2.2923	10.9398	0.259749
2013	210400	659600	789100	189226	127050	98440	33680	1850785	730667	242562	2249406	34500000	652000	10242000	1505000	33333.8	38280	18.7307	68.02	2.42218	11.0266	0.259749
2014	210400	523700	789733	196062	127220	98280	37090	1865091	726727	209733	2235027	34600000	592000	9877200	1449000	33176.2	37270	21.2202	72.03	2.23204	10.9805	0.259749
2015	210400	608100	790367	200974	121910	97600	40420	1.99236e+06	762688	159841	1647545	34500000	532000	9512400	1393000	33411.1	54420	20.549	72.51	2.48847	10.9399	0.259749
2016	210400	607900	791000	203894	116110	95840	43460	1204717	442830	180108	1751798	32600000	472000	9147600	1337000	38465	58260	23.2275	72.77	2.86817	10.6025	0.259749
2017	210400	690100	826000	206768	124160	105630	37280	1109114	603791	183833	1823227	32500000	412000	8782800	1281000	39105.3	68310	22.3713	73.99	2.71668	10.7148	0.259749
2018	210400	660000	843000	210393	126200	108580	34150	1139086	542950	201224	2096170	33100000	417000	8340000	1239000	37096.4	83290	23.0765	74.68	2.74455	10.8234	0.259749
2019	210400	742100	877000	209546	126760	109540	31020	1.17098e+06	565245	234802	2081401	33100000	437000	7641600	1206000	38188.7	92650	23.5878	69.33	2.72694	10.6193	0.259749
2020	210400	820800	883000	207328	136750	119180	27890	1116000	656000	220443	2050813	32400000	450000	8064000	1198000	43300.7	142770	28.6337	78.3	2.94897	10.6112	0.259749
2021	210400	835900	905000	206377	137700	120650	24760	1153483	696664	179844	1641310	32200000	443500	8400000	1193900	39277.8	119560	22.8952	78.5	2.7389	10.6755	0.259749
2022	210400	862200	926000	211638	137840	121130	21630	1158525	688493	157270	1738033	30900000	425290	8296800	1189900	41696.1	157390	23.5824	78.73	2.97769	10.7501	0.259749
2023	210400	881000	942513	216983	138520	121700	18500	1.14158e+06	682689	206731	1779568	30900000	407080	8193600	1185900	40102.2	201600	23.3757	79.57	2.79639	10.7833	0.259749
2008	210500	273000	502200	79757.4	61640	50910	20590	639715	212590	51815	758951	13100000	547000	9844800	764000	28302.9	1070	17.5473	66.97	1.92449	10.5775	0.259749
2009	210500	230000	522900	78065	60700	50500	20770	726930	238660	75023	966118	13000000	535000	9619200	764000	27324.2	8240	15.1581	66.84	1.82331	10.6983	0.259749
2010	210500	217000	530750	76216.4	59900	50100	20220	825664	288476	91306	1164764	13000000	523000	9393600	764000	27441.3	1750	15.3794	74.33	1.92054	10.9269	0.259749
2011	210500	303000	538600	73494.5	59080	50250	24860	1013447	335166	96256	1396448	13000000	511000	9168000	764000	30469.4	7050	19.1025	75.92	2.06294	11.1228	0.259749
2012	210500	270100	565000	70628	59350	49930	21100	1154518	375358	126230	1755681	13300000	499000	8942400	764000	32464.7	18560	21.5237	67.6	2.44333	11.1928	0.259749
2013	210500	288100	590100	68411.2	58340	49450	17340	1238844	395313	136371	1823992	13000000	487000	8716800	764000	30734.3	24960	17.4894	67.66	2.06189	11.2693	0.259749
2014	210500	239600	544425	67897.9	58290	49630	17170	1261102	397653	131152	1858365	12900000	475000	8491200	764000	36735.7	23470	22.7795	67.69	2.80033	11.2523	0.259749
2015	210500	331300	498750	67784.8	59150	50440	17170	1.31102e+06	418006	130873	1322787	12700000	463000	8265600	764000	33559.5	29020	21.0175	72.5	2.32859	11.2519	0.259749
2016	210500	327700	453075	68929.8	58010	49610	17340	1328555	397820	103167	1376437	12700000	451000	8040000	764000	38699.5	30730	22.6905	72.8	2.97277	10.8418	0.259749
2017	210500	341600	407400	70631.6	59480	51320	17420	931260	271313	102473	1356115	12300000	441000	7533600	755000	33808.1	33070	19.3995	71	2.59344	10.8687	0.259749
2018	210500	314600	414600	72238.8	58240	50000	16400	985215	284267	115112	1514621	12000000	404000	7275600	726000	37276.3	37530	22.9249	70.83	2.71077	10.9398	0.259749
2019	210500	331700	420200	71094.7	58930	50040	15380	1032275	291381	115932	1648167	12000000	426000	6718800	658000	41140.1	41520	22.8869	78.39	3.03081	10.8942	0.259749
2020	210500	333700	425700	68882.9	59850	50310	14360	1078218	309703	120198	1715273	11100000	393000	6974400	632000	43449.9	66950	27.8569	79.4	3.10011	10.9445	0.259749
2021	210500	346000	431000	67488.1	60700	50500	13340	1099147	345609	86208	1326422	11400000	373000	6590400	598000	41812.3	66410	25.8799	79.81	3.09745	11.0573	0.259749
2022	210500	346200	442100	69674	60480	50800	12320	1.17227e+06	343129	118531	1618401	11000000	315000	6610800	596000	42322.5	108680	27.6931	79.86	2.87837	11.105	0.259749
2023	210500	342200	454800	73100.6	60770	50960	11300	1.17744e+06	341142	128503	1721254	11000000	257000	6631200	594000	42689.9	136220	26.423	80	3.16246	11.1561	0.259749
2008	210600	915000	1457600	359723	204980	164630	70540	1283514	440241	76088	795148	67400000	691000	94078800	7339000	27544.1	3460	16.7166	74.06	2.02476	10.0533	0.259749
2009	210600	883000	1517800	355811	206100	165600	70910	1450920	480053	177018	1114247	69000000	773000	93194400	6961000	26896.7	8290	17.8599	73.34	1.92258	10.1281	0.259749
2010	210600	717000	1659850	350926	206800	166500	70830	1675524	549073	193375	1346622	71000000	855000	92310000	6583000	30071.7	5430	17.5117	60.33	2.25494	10.3156	0.259749
2011	210600	996000	1801900	343712	207190	166480	89010	2023508	700371	185743	1573292	64900000	937000	91425600	6205000	32546.8	10990	20.6003	59.61	2.2786	10.5149	0.259749
2012	210600	952000	1888900	336858	207010	165440	83290	2379744	805982	237354	1969376	74500000	1019000	90541200	5827000	30831.9	30190	17.8387	58.88	2.0681	10.6506	0.259749
2013	210600	959300	1990000	329918	204690	162590	77570	2513460	852297	300116	2243175	75900000	1101000	89656800	5449000	30270.1	45850	17.6801	58.16	2.08089	10.7406	0.259749
2014	210600	1007600	1849750	325241	204360	161400	79170	2528182	861630	293788	2058919	75900000	1183000	88772400	5071000	34516.7	47470	22.5369	57.44	2.30021	10.6619	0.259749
2015	210600	1048600	1709500	320833	205470	161910	79170	2.7287e+06	942568	234878	1804257	72400000	1265000	87888000	4693000	36269.3	72200	20.3441	65.7	2.744	10.63	0.259749
2016	210600	973400	1569250	319078	190450	160710	79380	2176211	633251	277495	1870057	67300000	1347000	87003600	4315000	37198	79670	23.3476	66.63	2.76434	10.3598	0.259749
2017	210600	1078500	1429000	318590	207020	178050	81550	2181876	710874	277077	2005855	68000000	1429000	86119200	3937000	39110.1	114370	24.6458	67.2	2.73268	10.419	0.259749
2018	210600	1064200	1424000	318597	209270	178660	80020	2371088	797598	276526	2160928	64200000	1511000	85234800	3559000	40899.4	112610	25.6017	68	2.70477	10.4603	0.259749
2019	210600	1137400	1498000	316616	208860	178750	78490	2562368	888799	304063	2354783	64200000	1593000	84350400	3181000	41075.1	136100	24.1521	68.8	3.14471	10.4031	0.259749
2020	210600	1141900	1524000	314783	209750	179300	76960	2.70787e+06	927747	319874	2453184	61900000	1675000	83466000	2803000	43312.9	177780	25.6993	68.9	3.29855	10.4259	0.259749
2021	210600	1155200	1549000	314724	209900	179590	75430	3.03501e+06	1.16846e+06	216742	1983961	60700000	1757000	82581600	2425000	41361.6	198040	26.5507	69.3	3.09991	10.5265	0.259749
2022	210600	1174100	1579000	320479	211400	179800	73900	3.26877e+06	1.24568e+06	311823	2317115	57500000	1839000	81697200	2047000	45007.8	199390	28.8921	69.47	3.0939	10.5777	0.259749
2023	210600	1203500	1609000	326228	212850	180880	72370	3.44758e+06	1.28505e+06	312947	2395131	56600000	1921000	80812800	1669000	42229.7	281950	27.108	70.3	3.16497	10.6361	0.259749
2008	210700	2106000	2235600	861878	423550	331420	181750	2360915	920832	74781	812106	140500000	3.38425e+06	8.2431e+07	5.13877e+06	28564.9	18020	17.0481	39.77	1.90784	10.0105	0.259749
2009	210700	1939000	2385100	859838	435500	352500	192160	2558041	961384	149345	1114530	151000000	3.59621e+06	8.46425e+07	5.41482e+06	29999.4	10240	18.6563	40.04	2.21248	10.0625	0.259749
2010	210700	1902000	2537900	858342	445900	351400	197440	2911063	1108701	200720	1384452	164000000	3.80818e+06	8.68541e+07	5.69088e+06	28438	5470	16.0814	47.86	1.92391	10.2954	0.259749
2011	210700	2577000	2690700	857696	454860	353960	260220	3355647	1249579	212227	1573647	164000000	4.02015e+06	8.90657e+07	5.96693e+06	30334	1950	17.7806	40.64	2.16063	10.4976	0.259749
2012	210700	2723600	2776600	856192	453400	358000	208710	3700778	1354846	335309	2047132	168300000	4.23212e+06	9.12772e+07	6.24298e+06	30083.3	13170	19.8248	40.56	2.23092	10.6056	0.259749
2013	210700	2537000	2849800	854866	448100	352730	157200	3947050	1429799	316272	2242213	169800000	4.57414e+06	9.33638e+07	6.35844e+06	32870.1	92970	19.3341	41.04	2.49817	10.6912	0.259749
2014	210700	1903800	2707600	852656	450130	358020	169340	4172600	1533843	384420	2284708	173600000	4.38356e+06	9.4702e+07	6.38613e+06	32186.5	129650	19.5833	53.81	2.38959	10.7072	0.259749
2015	210700	2111300	2565400	849101	460860	367210	181860	4.47848e+06	1.72674e+06	348985	2095553	167500000	4.30482e+06	9.22489e+07	6.35138e+06	32193.9	211510	18.6127	54.66	2.48734	10.689	0.259749
2016	210700	2497100	2423200	844751	457170	365840	188850	4280943	1741976	409449	2170940	166600000	4.04734e+06	9.01046e+07	5.97473e+06	37234.4	208040	21.1077	54.63	2.69787	10.44	0.259749
2017	210700	2432100	2281000	842122	449420	352230	198020	3692990	1409161	422120	2375708	169400000	4.02714e+06	8.83876e+07	6.10604e+06	36287	224970	20.2356	55.59	2.75582	10.5024	0.259749
2018	210700	2095900	2381000	840821	448990	352090	201250	3853197	1673530	406750	2686027	178800000	4.1418e+06	7.94457e+07	5.84555e+06	38940.7	244680	25.2415	56.26	2.98857	10.6071	0.259749
2019	210700	2554100	2482000	839484	456730	352600	204480	4245959	1813552	500824	3609910	178800000	4.03509e+06	7.63953e+07	5.42823e+06	38286.1	309740	22.8763	42.93	2.80422	10.5084	0.259749
2020	210700	2245400	2586000	838790	471420	363080	207710	4461808	1798011	422183	3010316	164100000	4.13116e+06	7.56855e+07	4.76465e+06	36705.2	391170	22.6729	59.7	2.64966	10.516	0.259749
2021	210700	2614600	2738000	841876	476900	363540	210940	4566415	1973496	224083	2144666	158700000	4.13776e+06	7.52263e+07	4.6334e+06	39148	390430	24.0887	60.49	3.02248	10.5932	0.259749
2022	210700	2535200	2851000	851048	471630	365060	214170	4852913	2105730	352911	2587334	155300000	4.16684e+06	7.47468e+07	4.48737e+06	45391	542570	29.0753	42.6	3.35114	10.6461	0.259749
2023	210700	2622800	3168000	858679	478630	367410	217400	4.87224e+06	2.24353e+06	364539	2789192	153900000	4.16569e+06	7.56234e+07	4.37932e+06	39969.7	656430	24.5943	61.34	3.08592	10.6946	0.259749
2008	210800	738000	1001500	190350	112620	97500	89870	1053692	377954	48746	772788	60600000	758329	1.8393e+07	1.15027e+06	27382.9	15640	17.0458	46.33	1.93493	10.312	0.259749
2009	210800	733000	1034900	189252	112500	97300	89870	1164984	404624	69695	1063752	61000000	794781	1.86698e+07	1.19613e+06	29847.8	34800	19.3588	46.89	2.21314	10.4345	0.259749
2010	210800	675000	1073050	187505	112100	96600	87030	1333103	470077	99239	1372882	61000000	831233	1.89466e+07	1.242e+06	29264.6	21970	16.8625	58.86	2.10052	10.6587	0.259749
2011	210800	766000	1111200	185120	110750	95380	100860	1566237	543859	117904	1831559	61200000	867686	1.92234e+07	1.28787e+06	29835.1	19570	17.0188	48.23	2.17221	10.859	0.259749
2012	210800	702400	1160200	182915	109750	94480	87020	1795285	640452	145563	2210335	60200000	904138	1.95002e+07	1.33373e+06	29593.9	38250	17.2192	47	2.17441	10.981	0.259749
2013	210800	678600	1191700	181598	105450	89410	73180	1900518	672683	160194	2477586	61000000	971676	1.98331e+07	1.35071e+06	31528.7	39860	18.2529	46.95	2.29527	11.0834	0.259749
2014	210800	671000	1123775	182292	110030	94040	73710	1.93483e+06	686153	121996	2196512	62000000	937178	2.02467e+07	1.36531e+06	36015	26440	21.2076	67.25	2.76499	11.1015	0.259749
2015	210800	691000	1055850	181602	109710	94070	73710	1994286	727465	137261	1720004	62100000	920697	1.97298e+07	1.35841e+06	34536.4	44310	21.817	67.4	2.54073	11.0833	0.259749
2016	210800	683900	987925	180229	109430	93360	74110	1777144	630102	142827	1978871	61600000	863505	1.92239e+07	1.27472e+06	34707.1	40820	21.4037	67.27	2.34549	10.8122	0.259749
2017	210800	679900	920000	178546	108550	93230	75050	1.77921e+06	639385	152326	2167200	58400000	853830	1.87398e+07	1.2946e+06	38505.5	47150	23.4249	67.69	2.81011	10.9108	0.259749
2018	210800	704100	944000	177191	113710	97550	75130	1843736	703219	156120	2277647	54800000	872825	1.6742e+07	1.23187e+06	40585.4	46440	26.4274	64.78	3.06226	10.9734	0.259749
2019	210800	750800	968000	174490	114790	97470	75210	1.94843e+06	749090	192135	2529533	54800000	838711	1.58791e+07	1.12828e+06	38368.1	56830	21.9562	64.79	2.57397	10.9594	0.259749
2020	210800	755800	992000	171370	111500	93320	75290	1920801	731940	213999	2725868	49300000	844024	1.5463e+07	973448	41008.4	87640	24.3418	67.2	3.06955	10.9636	0.259749
2021	210800	750000	1016000	170890	112100	93390	75370	2116875	778671	171190	2556402	49200000	839911	1.52699e+07	940518	39973.4	98510	24.4935	67.72	3.06344	11.0274	0.259749
2022	210800	759100	1040000	174317	112700	93650	75450	2274443	784687	193818	2513860	49300000	853478	1.53101e+07	919131	41444.8	127990	27.2113	67.75	3.16149	11.0522	0.259749
2023	210800	760900	1064000	177644	112560	93000	75530	2.34894e+06	810865	179723	2511315	48900000	861799	1.5645e+07	905994	40812.4	215720	25.0075	68.56	3.12774	11.0883	0.259749
2008	210900	2027000	1740600	1.0036e+06	385820	274000	74890	1104959	536616	52157	516975	109300000	3.93402e+06	9.58438e+07	5.97391e+06	29077.4	7300	18.0429	44.76	2.01928	9.4054	0.259749
2009	210900	1374000	1857500	1.00167e+06	421000	294700	78920	1344250	537837	77365	797723	121000000	4.18351e+06	9.84758e+07	6.29928e+06	28668.1	13410	18.2121	44.63	2.04272	9.61429	0.259749
2010	210900	2306000	2041700	1.00036e+06	464400	288600	81020	1774324	858159	88252	882722	129000000	4.433e+06	1.01108e+08	6.62465e+06	31691.4	4990	18.4043	44.88	2.34256	9.88805	0.259749
2011	210900	2502000	2225900	999006	552930	337280	131360	2171713	1002811	116481	1283599	139200000	4.68249e+06	1.0374e+08	6.95001e+06	30111.6	12200	17.435	45.13	2.21758	10.1267	0.259749
2012	210900	2681300	2366600	997780	530570	311910	114660	2438573	1120378	172142	1453992	146600000	4.93198e+06	1.06372e+08	7.27538e+06	34182.9	18070	18.948	48.09	2.43636	10.2828	0.259749
2013	210900	2505900	2460400	999353	500350	295710	97960	2649013	1224503	254577	1720375	154200000	5.34725e+06	1.09144e+08	7.43313e+06	33436.3	18300	21.7608	48.55	2.55945	10.3794	0.259749
2014	210900	1862700	2417450	1.00127e+06	485540	311170	127990	2426947	932559	251551	1752720	161800000	5.14762e+06	1.11209e+08	7.49924e+06	36656.6	29910	21.6057	44.9	2.50811	10.3652	0.259749
2015	210900	1413200	2374500	999656	478390	313990	138890	2.4014e+06	806805	223530	1299934	165300000	5.06811e+06	1.08606e+08	7.47755e+06	37248.1	69840	24.0434	46.6	2.86211	10.2305	0.259749
2016	210900	1699700	2331550	995771	479360	324140	144440	2380093	973985	306827	1379752	164500000	4.7709e+06	1.06213e+08	7.04285e+06	38851.9	127450	24.4314	46.8	2.85977	9.97941	0.259749
2017	210900	1921600	2288600	994026	468150	353950	151450	2.18401e+06	938069	296137	1457354	152600000	4.75357e+06	1.04331e+08	7.20746e+06	37561.8	141440	22.2406	46.9	2.63677	9.99855	0.259749
2018	210900	1977700	2480000	996473	478570	354290	157110	2.32369e+06	1.0212e+06	256220	1590218	151400000	4.90853e+06	9.41526e+07	6.92767e+06	41043.9	171530	26.6951	42.4	2.81793	10.0903	0.259749
2019	210900	2477000	2570000	1.00106e+06	472160	357320	162770	2.59278e+06	1.12407e+06	305851	1781731	151400000	4.81172e+06	9.10989e+07	6.47299e+06	36548.7	199960	23.1956	42.5	2.69625	10.1857	0.259749
2020	210900	2183500	2730000	1.00617e+06	473960	364690	168430	2.80253e+06	1.03727e+06	348448	1889007	144800000	4.95555e+06	9.07887e+07	5.71544e+06	36710.4	224100	21.2283	61.65	2.49239	10.2309	0.259749
2021	210900	2654300	2.85507e+06	1.01224e+06	471100	367010	174090	2.99299e+06	1.14255e+06	225307	1425710	142400000	4.97507e+06	9.04488e+07	5.571e+06	43887.1	233180	27.1598	61.79	3.03873	10.3182	0.259749
2022	210900	2556400	2.96997e+06	1.02145e+06	459130	368510	179750	3.1307e+06	1.09369e+06	257937	1610217	139900000	5.00114e+06	8.97127e+07	5.38584e+06	39321.9	491030	24.0512	62.33	2.7815	10.3825	0.259749
2023	210900	2693400	3.075e+06	1.02735e+06	466830	373820	185410	3168032	1.12523e+06	310077	1736015	139500000	4.98398e+06	9.04785e+07	5.23957e+06	44808.3	531380	27.7298	62.96	3.10251	10.4288	0.259749
2008	211000	906000	575700	238135	154380	136080	93940	693972	272498	43471	591895	52900000	952879	2.31558e+07	1.44605e+06	26603.3	6750	15.4934	43.66	1.91205	10.3384	0.259749
2009	211000	901000	614800	237961	156400	137200	93940	800650	312012	55796	806803	55000000	1.00493e+06	2.36274e+07	1.51274e+06	26715.9	13540	15.439	43.68	1.95545	10.4088	0.259749
2010	211000	704000	633000	237542	164000	142300	94180	917846	341475	65976	1000685	54000000	1.05699e+06	2.40991e+07	1.57942e+06	30671.4	6710	19.1656	55.89	2.32047	10.5996	0.259749
2011	211000	996000	651200	236614	163290	142220	128130	1135747	424109	79166	1231030	55400000	1.10905e+06	2.45707e+07	1.64611e+06	33048.6	17540	21.0831	43.77	2.51497	10.7939	0.259749
2012	211000	919400	698000	234901	164680	141250	98050	1271325	479874	102488	1373950	48700000	1.1611e+06	2.50424e+07	1.7128e+06	33643.8	26510	18.7651	42.56	2.37056	10.924	0.259749
2013	211000	1016700	721100	233086	161590	139140	67970	1351514	576984	121443	1627540	54200000	1.24718e+06	2.54564e+07	1.73368e+06	31728.5	40390	19.9223	42.47	2.39636	11.0021	0.259749
2014	211000	914800	734825	231765	158640	136710	72410	1370212	625123	129668	1640131	52400000	1.19152e+06	2.57414e+07	1.73585e+06	33869.2	4016000	19.4413	63.2	2.28046	10.9402	0.259749
2015	211000	982700	748550	230720	187020	137630	72460	1.48235e+06	738056	142439	1482810	52700000	1.16972e+06	2.50661e+07	1.72581e+06	37060.6	34080	23.6969	63.73	2.47945	10.9591	0.259749
2016	211000	977000	762275	230514	162790	135660	72910	1.47489e+06	751428	134483	1425655	54300000	1.10443e+06	2.45876e+07	1.63037e+06	37806.7	45870	24.5258	63.81	2.60209	10.5063	0.259749
2017	211000	1005300	776000	230281	156230	135220	73470	1365546	817168	134015	1486519	48100000	1.10124e+06	2.41699e+07	1.66972e+06	33788	56410	20.7056	64.48	2.34246	10.6713	0.259749
2018	211000	1036500	797000	229964	158620	135520	74890	1.45142e+06	906519	147884	1594229	47700000	1.13278e+06	2.17283e+07	1.59875e+06	38308.7	73850	22.9369	62.42	2.57753	10.8137	0.259749
2019	211000	1050900	812000	228438	157780	134020	76310	1.54718e+06	971767	187696	1854741	47700000	1.09802e+06	2.07884e+07	1.47711e+06	41699	104540	23.1546	62.41	3.13919	10.7739	0.259749
2020	211000	1084200	818000	227275	157850	134060	77730	1.70318e+06	1.08961e+06	216594	2011815	47500000	1.11936e+06	2.05074e+07	1.29101e+06	39873.3	131620	24.1904	67.79	3.03438	10.791	0.259749
2021	211000	1089600	829000	227829	159500	134100	79150	1.84558e+06	1.20535e+06	157411	1609106	47000000	1.11976e+06	2.03578e+07	1.25389e+06	37589.4	110130	24.3859	67.6	2.82181	10.8256	0.259749
2022	211000	1104900	865000	230641	159470	135100	80570	1.91618e+06	1.21453e+06	163262	1711193	46500000	1.12925e+06	2.0257e+07	1.21611e+06	44297.7	172730	28.2538	67.71	3.18379	10.868	0.259749
2023	211000	1120900	945000	233938	161540	135640	81990	1.97305e+06	1.25186e+06	160978	2127968	46300000	1.1349e+06	2.06028e+07	1.1931e+06	38378.4	206760	24.8978	68.4	2.88104	10.8587	0.259749
2008	211100	1136000	649000	334251	140960	126200	108950	1161627	557811	61313	582878	47300000	1.31312e+06	18964800	1240000	25751.4	6010	15.5072	81.04	1.82718	10.8637	0.259749
2009	211100	1145000	679000	333237	142300	127700	108950	1271596	580038	98645	829837	48000000	1.39191e+06	19710000	1188000	30063.4	16480	17.7553	82.13	2.18429	10.8602	0.259749
2010	211100	1051000	705000	331776	145300	129000	108950	1404272	619980	141552	1098203	50000000	1.4707e+06	21158400	1256000	29253.5	4850	17.4077	65.95	1.96384	11.1645	0.259749
2011	211100	1146000	734000	330581	145210	128310	126180	1635886	694098	139101	1441252	50100000	1.54948e+06	20995200	1294000	31529.3	27390	20.2856	82.65	2.38324	11.3546	0.259749
2012	211100	1083600	764000	329413	144410	127420	110820	1864717	774144	194245	1821769	46700000	1.62827e+06	21795600	1324000	30641.7	43280	20.2467	75.01	2.27117	11.4789	0.259749
2013	211100	1100500	791000	328269	145310	128080	95460	2012606	828447	202765	1952589	47200000	1.75647e+06	21854400	1317000	30278.4	44370	17.5562	74.94	2.30637	11.5592	0.259749
2014	211100	1124900	805000	327183	143720	126670	95460	2045310	844420	195295	2041160	47400000	1.68207e+06	21754800	1270000	35165.7	42680	21.4736	80.03	2.56377	11.5221	0.259749
2015	211100	1125700	811000	325551	142450	125410	96170	2098830	873925	201574	1732799	47700000	1.6505e+06	21589200	1208000	35194.2	58760	20.6306	80.17	2.42607	11.4825	0.259749
2016	211100	1113100	614000	323583	142990	124810	98170	2116098	900410	183778	1831204	46600000	1.55034e+06	19726800	1058000	35325.2	99510	21.5473	79.82	2.54281	11.2577	0.259749
2017	211100	1150800	539000	321385	138250	125730	98170	1.54492e+06	644286	183486	1846166	43800000	1.53691e+06	15678000	1041000	39858.7	94260	24.0203	80.4	3.04359	11.3342	0.259749
2018	211100	1186000	622000	319968	138330	125670	96170	1.6737e+06	686590	242598	2055103	42700000	1.57613e+06	15837600	1029000	37091.1	125260	21.546	73.18	2.70834	11.4466	0.259749
2019	211100	1186500	622000	319617	139050	126640	94170	1.76792e+06	726769	241853	2329156	42700000	1.53628e+06	15342000	970000	38861.8	169490	25.6922	73.2	2.65999	11.4982	0.259749
2020	211100	1169700	627000	320160	133640	121020	92170	1.81293e+06	775541	248198	2441591	37900000	1.57683e+06	14780400	831000	39721.3	249680	23.0925	77.4	2.92438	11.5199	0.259749
2021	211100	1154800	628000	322339	133600	121320	90170	2.05027e+06	858272	116829	1964266	37500000	1.58427e+06	14654400	820000	41936.8	267210	24.424	78.08	3.01764	11.5825	0.259749
2022	211100	1116500	628500	325562	132210	121830	88170	1.92707e+06	795412	179813	2140135	36700000	508000	12702000	809000	40407.7	244540	24.7738	78.12	3.01656	11.5905	0.259749
2023	211100	1149400	633867	327264	132140	122150	86170	1.91295e+06	794540	199416	2100965	36300000	1.58765e+06	10749600	798000	42817	225390	24.9366	78.71	3.08098	11.5823	0.259749
2008	211200	3615000	1.47916e+06	962804	515270	394900	150410	2511502	1123540	84682	773945	187700000	3.8187e+06	9.2928e+07	5.79714e+06	27459.4	13180	15.7408	32.03	2.07549	9.77173	0.259749
2009	211200	2562000	1.50926e+06	963234	532600	416500	151870	2729146	1067290	124648	1097129	174000000	4.04579e+06	9.51841e+07	6.09113e+06	31167	83750	19.3155	32.05	2.23223	9.89295	0.259749
2010	211200	3253000	1.58028e+06	962833	569000	435500	153940	3171668	1227383	174674	1415835	197000000	4.27288e+06	9.74401e+07	6.38512e+06	31748.5	74690	19.4227	42.16	2.31314	10.0717	0.259749
2011	211200	3690000	1.65131e+06	960066	573680	439660	212030	3675319	1364651	175926	1678158	213000000	4.49998e+06	9.96961e+07	6.67912e+06	33305	73320	19.3578	33.23	2.50496	10.2633	0.259749
2012	211200	3867400	1.69481e+06	956324	586410	457450	184640	4318475	1542306	280390	2002912	220900000	4.72707e+06	1.01952e+08	6.97311e+06	32979.1	115960	20.7299	38.01	2.45978	10.382	0.259749
2013	211200	3692200	1.74536e+06	952702	572380	456820	157250	4584546	1647548	322492	2195327	230000000	5.09763e+06	1.04049e+08	7.08614e+06	32790.2	144050	19.5074	38.55	2.42954	10.4388	0.259749
2014	211200	3460300	1.67523e+06	950434	578580	472590	165930	4641105	1640496	326283	2090819	224800000	4.88625e+06	1.05562e+08	7.11846e+06	34773.9	177430	22.895	42.58	2.63256	10.2653	0.259749
2015	211200	3967000	1.60511e+06	946929	555510	472830	172190	4.42503e+06	1804668	272821	2083146	229400000	4.80079e+06	1.02877e+08	7.08314e+06	34374.5	213320	20.1063	43.02	2.37664	10.1132	0.259749
2016	211200	3971200	1.53498e+06	944516	548500	472920	175390	2939474	1638858	383607	1865251	221500000	4.52533e+06	1.00746e+08	6.68034e+06	38961.8	225600	21.9418	43.1	2.78437	9.88336	0.259749
2017	211200	3841500	1.46486e+06	944261	510980	458590	176460	2832073	1406161	392647	1896468	218700000	4.51558e+06	9.91079e+07	6.84662e+06	36289.1	228810	23.6184	44.01	2.59529	9.91448	0.259749
2018	211200	3204400	1.46236e+06	946455	510050	458480	177760	3002118	1443788	372359	2122806	222400000	4.66215e+06	8.94266e+07	6.57994e+06	37812.4	233730	21.1832	44.07	2.61784	9.95784	0.259749
2019	211200	3578700	1.49936e+06	947088	505450	456690	179060	3268939	1618136	424639	2272629	222400000	4.5523e+06	8.61875e+07	6.12401e+06	40839.1	301270	24.1106	43	3.05502	10.0054	0.259749
2020	211200	3906500	1.51236e+06	947087	540100	488070	180360	3540174	1618581	436877	2368979	218300000	4.66455e+06	8.54573e+07	5.37982e+06	40515.8	326510	26.7462	55.2	3.10856	10.0511	0.259749
2021	211200	4159700	1514568	949331	543200	489720	181660	3671126	1549017	398869	1952561	212700000	4.6659e+06	8.48279e+07	5.22479e+06	43577.6	223240	26.2072	55.9	3.25061	10.1386	0.259749
2022	211200	3871800	1.53986e+06	956933	548420	492030	182960	3882003	1528136	412050	2138921	188000000	4.68527e+06	8.40465e+07	5.04567e+06	40535.9	504560	26.7794	56.5	2.75553	10.1974	0.259749
2023	211200	4159900	1.55486e+06	962423	552960	496320	184260	3682469	1458668	384375	2380331	185500000	4.66898e+06	8.476e+07	4.90842e+06	44492.2	572800	26.7573	57.1	3.31884	10.2114	0.259749
2008	211300	1534000	1539700	947268	406440	333930	165870	1996778	1040309	114906	929204	85200000	3.65075e+06	8.91316e+07	5.54669e+06	29651.9	6770	18.5074	27.49	2.15926	9.48038	0.259749
2009	211300	646000	1629100	944724	415100	342800	161580	2083684	836423	171890	1214473	90000000	3.90912e+06	9.21058e+07	5.88749e+06	26595.1	56800	15.9577	28.92	1.79635	9.62393	0.259749
2010	211300	2149000	1721050	944223	423000	343400	169880	2725870	1250487	201573	1467537	94000000	4.16749e+06	9.50799e+07	6.2283e+06	28178.2	540	15.6063	38.13	2.16882	9.87042	0.259749
2011	211300	2773000	1813000	944253	476690	378900	227620	3406891	1678755	230778	1731393	107800000	4.42586e+06	9.80541e+07	6.56911e+06	31819.6	24390	20.3638	30.07	2.28807	10.0792	0.259749
2012	211300	3006500	1919700	947657	500050	381030	193250	4092269	2106661	338098	2137193	112500000	4.68423e+06	1.01028e+08	6.90991e+06	32975.9	91970	18.7332	34.66	2.2432	10.2047	0.259749
2013	211300	2508500	1995100	952771	485490	363840	158880	4409536	2171621	375749	2290576	122700000	5.098e+06	1.04056e+08	7.08665e+06	30417.7	172490	18.0689	35.22	2.3564	10.2935	0.259749
2014	211300	1767600	1.98723e+06	954612	485930	374320	158390	4487911	2075009	373728	2279700	113000000	4.90773e+06	1.06026e+08	7.14976e+06	34975.4	131880	19.8951	38.44	2.69819	10.2809	0.259749
2015	211300	1966000	1.97936e+06	951404	493220	377560	168190	4610687	2230275	384659	1940641	114300000	4.82348e+06	1.03363e+08	7.11661e+06	36948.8	221030	24.4233	38.5	2.61939	10.1295	0.259749
2016	211300	2388300	1.97149e+06	946904	464530	379570	195040	3949792	1815561	480262	2151690	101900000	4.53677e+06	1.01001e+08	6.69723e+06	34126.7	179920	21.2739	38.49	2.46381	9.95288	0.259749
2017	211300	2739400	1.96361e+06	945409	460870	419940	206870	3520137	1733656	484523	2344146	100700000	4.52107e+06	9.92284e+07	6.85495e+06	34628.6	218420	21.4063	39.2	2.3868	10.0301	0.259749
2018	211300	2776700	1.95574e+06	944097	459700	419920	210360	3.74524e+06	1.78242e+06	566732	2680958	99700000	4.65053e+06	8.92038e+07	6.56354e+06	39529.2	304880	23.9832	40.01	2.8084	10.1164	0.259749
2019	211300	2937800	1.94787e+06	941786	465520	425490	213850	4.12689e+06	1.94034e+06	608458	3005607	99700000	4.52682e+06	8.5705e+07	6.08973e+06	40225.2	351120	23.6621	40.37	2.77267	10.1332	0.259749
2020	211300	2329300	1940000	935913	491950	440840	217340	4.49415e+06	2.04078e+06	611557	3239159	96700000	4.60951e+06	8.44491e+07	5.31634e+06	42441.3	455990	25.133	50	3.27739	10.1821	0.259749
2021	211300	3000500	2065000	932022	497500	447010	220830	4.84435e+06	2.2394e+06	427046	2807735	97500000	4.58082e+06	8.32813e+07	5.12953e+06	38276.8	407030	24.5349	50.8	2.53973	10.2685	0.259749
2022	211300	3139000	2282000	942045	504960	452390	224320	5.1452e+06	2.36599e+06	471768	3030498	97200000	4.61238e+06	8.2739e+07	4.96718e+06	45015.3	730700	28.2898	51.1	3.11836	10.3262	0.259749
2023	211300	3024700	2535900	956802	507340	452960	227810	5.25421e+06	2.45767e+06	485991	3183135	99100000	4.64172e+06	8.4265e+07	4.87975e+06	39080.2	872670	25.0499	51.68	2.59304	10.3797	0.259749
2008	211400	1174000	1.47916e+06	465197	233230	171250	65820	1203533	437417	64712	704771	71500000	1.78633e+06	4.37446e+07	2.71607e+06	28940.6	9130	18.7739	30.93	2.03123	9.7006	0.259749
2009	211400	721000	1.50926e+06	465523	231100	178700	68660	1171238	369999	86075	926136	67000000	1.93149e+06	4.5571e+07	2.90996e+06	27356.3	21370	16.6191	30.92	1.98816	9.66686	0.259749
2010	211400	1067000	1.58028e+06	467813	239200	188300	70920	1376035	474072	163741	1094920	85000000	2.07665e+06	4.73975e+07	3.10385e+06	31988.1	13080	20.0642	31.62	2.26416	9.84493	0.259749
2011	211400	1235000	1.65131e+06	474022	238630	189250	93670	1621081	583946	174093	1467945	89500000	2.22181e+06	4.92239e+07	3.29774e+06	31370.5	11370	17.4229	31.6	2.23294	10.048	0.259749
2012	211400	1256200	1.69481e+06	478859	238860	189250	82830	1828520	678943	230981	1667955	85100000	2.36698e+06	5.10503e+07	3.49163e+06	32491.1	69650	20.9373	31.8	2.37112	10.1539	0.259749
2013	211400	1282500	1.74536e+06	481196	242620	189530	71990	1942017	734889	217253	1805623	86400000	2.57474e+06	5.25536e+07	3.57911e+06	30496.8	77590	17.5996	31.7	2.28411	10.2289	0.259749
2014	211400	446500	1.67523e+06	478396	248060	193260	74550	1878639	546745	254978	1673740	84500000	2.45947e+06	5.3134e+07	3.58304e+06	31476.5	85400	20.4436	31.6	2.33117	10.1545	0.259749
2015	211400	796100	1.60511e+06	475727	251200	194080	70320	2.03418e+06	687547	247393	1658146	85500000	2.41187e+06	5.16844e+07	3.55849e+06	32562.3	113260	21.1464	33.2	2.51258	10.1547	0.259749
2016	211400	899800	1.53498e+06	472217	249730	185430	72290	2119212	827243	343535	1867305	82700000	2.26247e+06	5.03686e+07	3.33988e+06	35199.6	124650	23.2753	33.5	2.39758	10.0484	0.259749
2017	211400	831000	1.46486e+06	469756	256340	170260	79990	2222069	876417	286444	1988768	82700000	2.24644e+06	4.93047e+07	3.40609e+06	38363.7	136290	23.9105	34.4	2.83996	10.1627	0.259749
2018	211400	785800	1.46236e+06	467316	256180	172880	80410	2393029	966396	301635	2381520	83300000	2.30195e+06	4.41548e+07	3.24887e+06	38340	135330	21.5877	35	2.9675	10.2904	0.259749
2019	211400	769100	1.49936e+06	461340	262660	172660	80830	2.55493e+06	1.01778e+06	345049	2483790	83300000	2.21749e+06	4.19831e+07	2.98309e+06	41867.6	146170	23.2345	35.03	3.0229	10.2833	0.259749
2020	211400	678200	1.51236e+06	454112	253640	152080	81250	2704499	1061851	326483	2537409	77100000	2.23657e+06	4.09753e+07	2.57953e+06	39292.3	166970	25.3486	54.76	2.97419	10.2454	0.259749
2021	211400	745700	1514568	450119	264700	152100	81670	2842333	1174201	268657	2346696	76600000	2.2123e+06	4.02206e+07	2.4773e+06	38440.9	155880	23.5782	55	2.69873	10.344	0.259749
2022	211400	726700	1.53986e+06	452184	264340	153030	82090	2980916	1208432	245960	2266053	73700000	2.21395e+06	3.97149e+07	2.38426e+06	39471.6	205530	23.0843	55.8	2.80129	10.3816	0.259749
2023	211400	705300	1.55486e+06	454689	267150	151180	82510	3031702	1274800	276114	2335517	72800000	2.20582e+06	4.00442e+07	2.31894e+06	39247.7	244080	24.073	56.62	2.75537	10.432	0.259749
2008	220100	9257590	3532700	2.86884e+06	1189764	1097197	235940	4052479	1713637	167485	2403300	3.94767e+08	6117000	128031600	8639000	16118.7	190780	9.49137	47.96	1.16351	10.4354	0.158962
2009	220100	7308024	3900000	2.87109e+06	1260099	1155556	233000	4184106	1853285	271329	3060062	4.21948e+08	4655000	130161600	8368000	17488.6	167290	11.3957	47.89	1.32038	10.5362	0.158962
2010	220100	7961206	4270000	2.87079e+06	1257193	1150479	240760	4746869	2134388	321337	3829323	4.49129e+08	4778000	127584000	8401000	18283.5	186110	11.2486	47.81	1.22041	10.6889	0.158962
2011	220100	8125163	4690000	2.86978e+06	1333060	1220935	255160	5237896	2485801	341658	5186814	4.7631e+08	4749000	146318400	9400000	22422.7	171940	14.384	47.89	1.54054	10.8695	0.158962
2012	220100	9112176	5138900	2.86784e+06	1344118	1245338	255420	5625370	2841112	355569	5555117	5.03491e+08	4974000	148453200	10793000	22212.5	185330	14.311	47.96	1.61488	10.9833	0.158962
2013	220100	9843699	5548100	2.86077e+06	1340272	1245453	255680	6026568	3073032	417241	6329668	5.25957e+08	4908000	155000400	9579000	22287.4	213750	14.3212	48.33	1.57608	11.1045	0.158962
2014	220100	9680193	6002600	2.84978e+06	1336334	1243593	252640	6268802	3225243	359092	6758377	5.48682e+08	4810000	160537200	9796000	22210.3	226030	13.3673	48.5	1.66312	11.1676	0.158962
2015	220100	9557275	6540000	2.83438e+06	1334123	1250636	251400	6495784	3214298	462737	7657246	5.60071e+08	4652000	161790000	10524000	25118.1	282940	15.5851	57.85	1.88114	11.2031	0.158962
2016	220100	9883495	6603900	2.82063e+06	1349419	1255776	251390	6316110	2918163	574623	7705743	5.65616e+08	5824000	158784000	9537000	25492.5	398840	14.9673	58.11	1.71635	11.2835	0.158962
2017	220100	10502572	7092100	2.80993e+06	1318169	1270290	252800	5570565	1919768	1014016	8757334	5.58224e+08	5988000	160011600	9274000	26292.4	454440	15.9731	58.53	1.91903	11.3836	0.158962
2018	220100	8646621	7511500	2.80391e+06	1323600	1271288	252800	5817186	2098343	974845	8943429	5.50566e+08	5693000	156255600	8597000	24826.4	554720	15.2411	58.76	1.70768	11.4674	0.158962
2019	220100	9431397	8006000	2.79985e+06	1.31273e+06	1259449	252800	6775889	2079100	881494	8960220	5.47211e+08	5052000	153964800	9616000	22823.1	637820	13.4743	59.05	1.54461	11.2683	0.158962
2020	220100	11638969	10408000	2.79914e+06	1633238	1565826	284690	9808322	3221369	1094548	9906356	5.43047e+08	6196000	182164560	11753200	26529.9	764380	15.5887	65.9	1.90412	11.3226	0.158962
2021	220100	12365170	11408000	2.80272e+06	1641071	1569120	284690	9596735	3656227	1183452	9664851	687156090	5356230	164853948	11243900	22415.4	1114650	13.2327	66.8	1.63528	11.331	0.158962
2022	220100	12423861	12055000	2.80901e+06	1650221	1577981	283920	10068578	4212795	1039359	9766704	684377390	5286370	153013080	10791650	28979.6	1387540	16.5247	67.1	2.02594	11.2805	0.158962
2023	220100	12745666	12573600	2.81227e+06	1663235	1586384	283150	9676306	4209845	1215308	10749675	689452250	5.21651e+06	1.41172e+08	10339400	22885.9	1574900	13.5104	68.2	1.6696	11.3288	0.158962
2008	220200	4576601	2107000	1.25275e+06	630091	579292	159700	2424054	1171097	116077	1358728	2.40868e+08	2.79825e+06	8.33475e+07	6.48782e+06	17534.7	46960	11.3408	48.89	1.23739	10.2977	0.158962
2009	220200	3650967	2540000	1.24775e+06	671083	621470	159700	2640970	1199194	156762	1647383	2.37513e+08	2.77458e+06	8.21245e+07	6.23667e+06	16109.4	56490	10.3647	48.84	1.19667	10.443	0.158962
2010	220200	3703391	2810000	1.24141e+06	683771	636454	180970	2998785	1376032	215244	2137792	2.28178e+08	2.97971e+06	8.67705e+07	5.98395e+06	19245.3	95500	10.8891	48.7	1.46843	10.6331	0.158962
2011	220200	3653717	3060000	1.24119e+06	688732	642833	178630	3852392	1815216	208964	2515671	7.54572e+07	2.55249e+06	4.26795e+07	4.67956e+06	20203.4	106850	12.6445	48.56	1.40134	10.8388	0.158962
2012	220200	3823000	3281700	1.24099e+06	691912	645302	178810	4240732	2259786	207448	2849407	8.73253e+07	2.69296e+06	4.61599e+07	4.81191e+06	17499.5	103620	10.8827	48.66	1.32772	10.9404	0.158962
2013	220200	4228000	3519400	1.2411e+06	696880	651953	178990	4620256	2467626	264458	3278090	9.91934e+07	2.05024e+06	4.96402e+07	4.51408e+06	22664.8	86770	13.4745	48.65	1.6642	11.0186	0.158962
2014	220200	4133758	3681000	1.23361e+06	689257	644259	179170	4750749	2733584	269277	3273310	1.11061e+08	436891	5.31205e+07	106279	21988.1	101760	12.4231	48.51	1.59792	10.9266	0.158962
2015	220200	4.23001e+06	3850000	1.21897e+06	676226	637871	179350	4888698	2508702	316721	3665378	1.2293e+08	718900	5.66008e+07	694483	24494.6	124580	15.154	52.33	1.67869	10.9361	0.158962
2016	220200	4232214	3519600	1.20208e+06	694556	656748	179530	4660190	2280902	307469	3802096	1.34798e+08	1.00091e+06	6.00811e+07	1.28269e+06	22742	182070	12.8106	52.8	1.70257	10.9706	0.158962
2017	220200	4638102	3812600	1.19411e+06	691308	678351	179710	2678612	957320	519225	4012191	1.46666e+08	1.28292e+06	6.35614e+07	1.87089e+06	25821.6	212510	14.5892	52.8	1.94639	10.9365	0.158962
2018	220200	3901524	4102800	1.19695e+06	675819	659533	179890	2815450	1069683	517262	4119428	1.58534e+08	1.56493e+06	6.70417e+07	2.4591e+06	22327.1	246730	13.3885	52.94	1.55601	10.8853	0.158962
2019	220200	4287376	4326000	1.20132e+06	669865	653566	180070	3121481	1124301	530690	4206009	1.70402e+08	1.84693e+06	7.0522e+07	3.0473e+06	27295.1	266540	16.8597	52.99	1.95523	10.4456	0.158962
2020	220200	4261839	4639000	1.2076e+06	673662	656331	180250	3897665	1318987	573069	4459881	1.8227e+08	2.12894e+06	7.40023e+07	3.6355e+06	25122.2	275020	13.9729	63.47	1.84649	10.4829	0.158962
2021	220200	4502724	4878000	1.21996e+06	673802	657113	180430	3868852	1416275	411411	3277385	1.94138e+08	2.41095e+06	7.74826e+07	4.22371e+06	27314	394220	15.4022	64.12	2.1072	10.5599	0.158962
2022	220200	4554500	5196000	1.24794e+06	683886	668151	180610	4067459	1593413	525639	3976178	2.06006e+08	2.69296e+06	8.0963e+07	4.81191e+06	23340.6	545550	14.6046	52.73	1.67599	10.544	0.158962
2023	220200	4672481	5321000	1.27206e+06	696191	673861	180790	3985508	1602835	584021	4111089	2.17874e+08	2.97497e+06	8.44433e+07	5.40012e+06	27887.3	662300	15.7255	52.51	2.15143	10.5909	0.158962
2008	220300	6940512	1945400	1.12303e+06	728863	650197	175560	3124214	1185503	83218	714806	1.54469e+08	4248000	134990400	10814000	19654.6	118110	10.9513	37.73	1.31019	9.77976	0.158962
2009	220300	5555654	2120000	1.12492e+06	777146	706619	179370	3350875	1115119	123793	907641	1.65396e+08	4026000	130758000	10375000	19226.4	103450	12.348	37.34	1.39585	9.87409	0.158962
2010	220300	7710636	2170000	1.12663e+06	843742	768906	184950	3962952	1567250	164701	1137529	1.76323e+08	3804000	126525600	9936000	16753.1	163430	10.2361	37.14	1.18524	10.0385	0.158962
2011	220300	7550260	2440000	1.12819e+06	915056	848303	177900	4653571	1831823	180112	1398180	1.8725e+08	3582000	122293200	9497000	18208.6	143990	12.1093	52.97	1.38628	10.2704	0.158962
2012	220300	7710180	2610200	1.1288e+06	915717	857845	188440	4913793	2041092	187254	1716558	1.98177e+08	3360000	118060800	9058000	19449.5	171120	12.0495	42.84	1.47517	10.4159	0.158962
2013	220300	8012500	2799300	1.12725e+06	915635	858569	198980	5213790	2175225	188239	1784524	2.07247e+08	3138000	113828400	8619000	20122.4	173790	13.0386	43.67	1.48723	10.5148	0.158962
2014	220300	7706373	3077400	1.12466e+06	915875	870070	206260	5356433	2173166	226445	1913935	2.16537e+08	2916000	109596000	8180000	20635.9	170620	12.1652	44.47	1.5596	10.5157	0.158962
2015	220300	7621753	3580000	1.12041e+06	916060	875216	206320	5608918	2210628	269147	2211062	2.21391e+08	2694000	105363600	7741000	19898.4	216140	12.389	36.63	1.36894	10.5396	0.158962
2016	220300	7676142	3710500	1.11575e+06	916248	864490	206320	5480218	2004460	269607	2612708	2.2374e+08	2472000	101131200	7302000	19888	223860	12.0168	36.87	1.40318	10.5145	0.158962
2017	220300	8169368	3982800	1.11124e+06	912730	893191	208800	3720333	1333766	620569	3038035	2.2076e+08	2250000	96898800	6863000	24292.1	251390	13.9728	39.42	1.753	10.4166	0.158962
2018	220300	6850493	4195000	1.10902e+06	931910	889630	218530	3900558	1477548	613974	2904321	2.17763e+08	2028000	92666400	6424000	23423.5	258060	14.0249	36.67	1.60346	10.2956	0.158962
2019	220300	7182280	4526000	1.10747e+06	933246	888466	227500	4503128	1511073	661935	3250169	2.16448e+08	1806000	88434000	5985000	23006.7	293690	14.682	36.5	1.75485	10.1279	0.158962
2020	220300	4440922	3086000	1.1079e+06	617554	581777	195600	3851388	1157991	724123	2572962	2.14938e+08	452000	59317200	3114000	26746	334720	14.9881	51.57	1.78666	9.90349	0.158962
2021	220300	4673200	3242000	1.10978e+06	618866	581883	196420	3782420	1228643	398927	2177021	286293000	398000	62856000	3091000	25786.4	340970	14.857	51.99	1.70662	10.1852	0.158962
2022	220300	4674500	3347000	1.11365e+06	617748	584616	207240	4130298	1404546	417621	2173280	284009100	532400	62336640	2955800	23663.8	403650	14.6717	42.28	1.6821	10.2345	0.158962
2023	220300	4806982	3497000	1.11588e+06	619035	586338	218060	3989190	1392132	456203	2407889	2.10088e+08	666800	61817280	2.8206e+06	26327.6	493930	15.1688	42.11	1.74244	10.1811	0.158962
2008	220400	1377843	603600	417122	162016	155054	27870	625859	234364	35693	409713	5.79843e+07	798147	11715600	1.45749e+06	20024.1	31830	11.0497	45.07	1.52033	9.99828	0.158962
2009	220400	1062590	690000	417029	163207	157973	29000	660112	197578	52732	529870	6.15861e+07	657364	12331200	1.51859e+06	17197.4	22100	11.3049	45.13	1.20739	10.2095	0.158962
2010	220400	1340000	890000	416524	164254	158220	30580	782214	305275	67400	640246	6.51879e+07	688082	12946800	609000	21126.6	34130	12.9032	45.23	1.47156	10.4086	0.158962
2011	220400	1259816	1000000	414460	184891	178824	31520	844320	361814	65480	688258	6.87897e+07	263000	13562400	1219000	17309.7	36530	9.91915	45.28	1.30913	10.6178	0.158962
2012	220400	1327500	1138200	412336	230357	224836	31550	932485	389605	71369	826535	7.23915e+07	359000	14178000	1829000	22381.6	42840	12.5368	45.5	1.63724	10.8118	0.158962
2013	220400	1456000	1218400	408797	229818	223766	31580	1012885	393562	95105	938008	7.5158e+07	455000	14793600	2439000	18533.1	43050	11.7733	45.57	1.43119	10.9586	0.158962
2014	220400	1496500	1253400	406346	233775	227701	23010	1049082	471974	93976	993453	7.82359e+07	551000	15409200	3049000	19546.3	40590	11.1571	45.47	1.46275	10.9451	0.158962
2015	220400	1511367	1340000	404285	244036	238449	23000	1102579	457930	117764	1107002	7.98862e+07	647000	16024800	3659000	19096.7	41000	10.948	48.46	1.35194	11.0046	0.158962
2016	220400	1540016	1256900	401951	245582	239591	23010	1071723	414120	119152	1105557	8.06026e+07	743000	16640400	4269000	25913	57860	15.1757	50.23	1.98983	11.063	0.158962
2017	220400	1752225	1304100	399040	248623	246063	23020	637048	280483	196316	1226718	193500000	765000	17740800	4246000	24348.9	72340	14.1864	50.55	1.82201	10.9813	0.158962
2018	220400	1476000	1379500	397790	247470	243526	23020	671954	301077	192704	1212277	191200000	707000	18312000	2823000	25835.8	79780	14.6191	50.32	1.88257	10.8805	0.158962
2019	220400	1601145	1432000	397123	228377	224096	22890	756321	306137	192682	1331042	181800000	676540	17573484	2740140	28258.6	101810	18.154	49.9	2.0032	10.4643	0.158962
2020	220400	1513142	1465600	396957	231218	226220	22880	951990	373893	210418	1379763	170700000	598300	17246400	2531010	22330.5	78580	13.3545	57.7	1.6458	10.5249	0.158962
2021	220400	1599990	1515600	398635	231260	226733	19870	964494	384897	164362	1020318	101700000	218690	17578044	2503430	24444.4	127610	13.9287	58.32	1.8073	10.6119	0.158962
2022	220400	1613500	1577000	404977	231317	227036	20020	1065608	436322	196609	1233427	100400000	828324	17909688	2475850	23945.7	170090	15.0256	49.52	1.77909	10.6996	0.158962
2023	220400	1654993	1625000	410109	231410	227212	20170	1036601	440123	199539	1351873	99500000	798147	18241332	2448270	24957.5	187760	14.221	59.82	1.84524	10.7372	0.158962
2008	220500	1957531	1250400	549770	270392	238535	99600	970021	493759	81059	698841	1.03853e+08	1.20649e+06	3.59361e+07	2.79729e+06	17842	34860	11.1184	37	1.31254	9.8856	0.158962
2009	220500	1611500	1360000	545210	272153	239923	99370	996176	460323	120348	933776	1.0176e+08	1.18874e+06	3.51853e+07	2.67203e+06	20993.8	38620	11.6763	40.3	1.41823	10.0362	0.158962
2010	220500	1751398	1360000	540400	305833	273734	109590	1143716	535445	168031	1199057	9.7391e+07	1.2718e+06	3.70354e+07	2.55407e+06	21583.3	46820	14.1267	48.09	1.63435	10.2304	0.158962
2011	220500	1706000	1430000	535648	325846	293127	108160	1406535	671358	176458	1406310	4.09762e+07	1.16217e+06	2.1679e+07	2.07662e+06	17547.1	36530	10.2842	48.6	1.16736	10.4494	0.158962
2012	220500	1789028	1508200	531206	326065	293001	108270	1527851	733665	185478	1761474	4.53332e+07	1.08582e+06	2.28846e+07	925638	18864.5	44500	10.4817	51.12	1.27964	10.5772	0.158962
2013	220500	1913296	1595200	529725	327146	292940	108380	1642481	820933	222683	2006417	4.96903e+07	892719	2.40902e+07	1.13943e+06	19544.9	47080	10.916	52.47	1.32065	10.7175	0.158962
2014	220500	1817000	1638600	528525	322673	287229	108490	1697241	823519	219944	2086990	5.40474e+07	272080	2.52957e+07	197498	19243.8	35770	12.1432	52.36	1.45964	10.723	0.158962
2015	220500	1818480	1690000	525573	325747	293194	108600	1749592	907404	241304	2302612	5.84044e+07	383341	2.65013e+07	432388	19743.4	35240	10.9247	52.49	1.48454	10.7207	0.158962
2016	220500	1887230	1618400	522624	332774	299943	108710	1607789	780975	266772	2588675	6.27615e+07	494603	2.77069e+07	667279	22793.3	71240	13.8871	51.97	1.70055	10.6706	0.158962
2017	220500	2056311	1735900	524204	322936	302930	108820	1266672	574627	324769	2545814	6.71185e+07	605864	2.89124e+07	902170	21113.9	97700	12.8785	51.88	1.4945	10.6199	0.158962
2018	220500	1903007	1814800	526803	337758	312989	108930	1349077	654372	333782	2485978	7.14756e+07	717126	3.0118e+07	1.13706e+06	20637	107050	12.3328	51.7	1.44265	10.5556	0.158962
2019	220500	2040450	1884000	527016	332844	308656	109040	1415718	678971	341626	2672969	7.58327e+07	828387	3.13236e+07	1.37195e+06	25249.2	117630	14.3311	50.15	1.82672	10.4273	0.158962
2020	220500	1350403	1289000	526920	231323	210658	109150	1240947	652029	374187	2843932	8.01897e+07	939649	3.25292e+07	1.60684e+06	24959.3	135470	15.4355	60.64	1.88949	10.4701	0.158962
2021	220500	1386123	1350000	531281	230569	210913	109260	1246308	666200	283239	2376012	8.45468e+07	1.05091e+06	3.37347e+07	1.84173e+06	24153.7	169200	15.9383	61.3	1.79669	10.2054	0.158962
2022	220500	1418000	1425000	544286	234404	215297	109370	1371336	740953	327791	2625424	8.89038e+07	1.16217e+06	3.49403e+07	2.07662e+06	28244.6	218130	15.9766	61.5	2.12995	10.2498	0.158962
2023	220500	1446995	1482000	557925	235199	216089	109480	1337809	730338	325112	2678838	9.32609e+07	1.27343e+06	3.61459e+07	2.31151e+06	24660.7	232880	16.2728	62.51	1.8344	10.2897	0.158962
2008	220600	230177	430700	89253.8	57959	45607	4340	572655	229970	53510	583540	1.33604e+07	141283	5.46613e+06	255515	16446.5	6810	9.47364	68.3	1.23296	10.0502	0.158962
2009	220600	177698	450000	86940.8	59748	47131	4340	622226	260639	73657	764146	1.33223e+07	137045	5.37939e+06	273478	20106.8	5190	11.3451	67.88	1.3525	10.2217	0.158962
2010	220600	200490	390000	83948.6	62628	50533	4340	710134	303345	98804	1000777	1.32843e+07	138680	5.29265e+06	291442	20530.1	5480	12.2587	68.73	1.46364	10.424	0.158962
2011	220600	228306	430000	79808.6	63470	49572	4340	823451	444103	123201	1273793	1.32462e+07	173157	5.20591e+06	309405	17934.1	42980	10.5545	68.82	1.30584	10.63	0.158962
2012	220600	238717	441600	75232.2	64194	49247	4340	910867	483157	135844	1400929	1.32081e+07	180350	5.11917e+06	327369	19339	9540	12.0502	69.38	1.31267	10.8253	0.158962
2013	220600	262000	454900	74543.6	64338	49270	4340	1003030	670651	156759	1371566	1.3705e+07	178969	5.21167e+06	359412	22091.8	7580	14.2253	70.31	1.64448	10.8781	0.158962
2014	220600	240703	457300	75307.7	66456	51067	1820	1051852	706787	146145	1381508	1.44994e+07	169379	5.01343e+06	380728	19818.6	26130	11.6987	69.38	1.33361	10.8868	0.158962
2015	220600	272735	460000	74461.4	67117	52299	1900	1092523	740022	211829	1575478	1.47135e+07	170932	5.09131e+06	396311	21836	26270	14.1097	73.12	1.5718	10.8842	0.158962
2016	220600	265524	311900	72527.3	66982	51981	1820	1034213	675660	219632	1788066	1.45438e+07	176952	5.00843e+06	364345	25109	32780	14.3557	75.18	1.82815	10.9526	0.158962
2017	220600	276142	312100	72500.1	65979	53273	2240	877917	468892	215329	1863368	1.4403e+07	186250	5.05744e+06	350966	22714	47950	13.2866	74.62	1.74081	10.9437	0.158962
2018	220600	271743	258800	71662.3	71855	58877	2240	942590	531575	248890	1915758	1.40714e+07	188401	4.98063e+06	314285	24328.6	59880	14.0802	74.3	1.84129	10.9345	0.158962
2019	220600	313812	256000	70065.5	82124	65964	2240	984610	553653	256823	2006272	1.36938e+07	167322	4.75479e+06	293453	24681.9	69960	15.2627	74.21	1.7379	10.6806	0.158962
2020	220600	297816	259000	68643.2	81949	68120	1850	1158319	677088	245406	2030031	1.33171e+07	157383	4.6674e+06	277408	21779.7	81380	13.4367	79.32	1.49571	10.6979	0.158962
2021	220600	309921	263000	68960.9	82798	68660	1850	1213593	688983	169147	1461677	1.32095e+07	143047	4.60613e+06	267382	24840.2	122970	14.6876	79.64	1.84198	10.7764	0.158962
2022	220600	313123	267000	73795.2	82515	68674	1210	1328646	786609	185264	1672078	1.40089e+07	150938	4.65644e+06	276720	24053.2	174730	15.8781	79.95	1.68412	10.7871	0.158962
2023	220600	319499	268000	81838	82590	69261	570	1304437	729832	196944	1767602	1.54078e+07	159272	5.03575e+06	290844	25361.6	190720	14.9959	80.3	1.88064	10.8172	0.158962
2008	220700	7252942	3808400	2.34569e+06	851106	698092	460200	2417551	1374614	115121	745625	4.70362e+08	5.46437e+06	1.62759e+08	1.26693e+07	16546.8	123030	9.9635	27.77	1.13305	10.2505	0.158962
2009	220700	5547800	4300000	2.36467e+06	953566	791970	390510	2772412	1554605	198577	930056	4.60919e+08	5.38436e+06	1.59371e+08	1.21029e+07	17550.1	91990	10.2946	27.94	1.16487	10.3496	0.158962
2010	220700	6408568	4580000	2.37999e+06	950890	795348	555970	3647036	2040579	175518	1042878	4.40727e+08	5.75534e+06	1.67598e+08	1.1558e+07	16806.3	151010	11.0251	28.02	1.21113	10.5459	0.158962
2011	220700	7001500	5000000	2.38623e+06	934154	815845	548690	4128400	2506905	176765	1222728	1.32079e+08	3.39052e+06	7.70182e+07	7.48734e+06	22396.8	148280	14.0899	28.22	1.50425	10.7492	0.158962
2012	220700	7150074	5438400	2.39257e+06	1217804	1032437	549250	4565797	2960537	208222	1425859	1.56077e+08	5.1773e+06	8.41669e+07	9.25104e+06	18268	153580	11.0138	29.59	1.25	10.9223	0.158962
2013	220700	7501866	5800800	2.39719e+06	1210360	1061098	549810	4599829	3047802	262855	1601074	1.80074e+08	3.93165e+06	9.13156e+07	3.81188e+06	22434.7	170970	13.2263	29.67	1.63742	10.9737	0.158962
2014	220700	7135136	6208400	2.39395e+06	1223622	1054427	550370	4742504	3019053	287532	1718609	2.04072e+08	710942	9.84643e+07	4.68122e+06	23152.2	140910	12.9642	27.03	1.68345	10.9564	0.158962
2015	220700	7379364	6650000	2.38039e+06	1224453	1035471	550930	4997758	3068800	305845	1829262	2.2807e+08	1.26924e+06	1.05613e+08	1.13029e+06	22328.3	147000	13.6456	31.32	1.47968	10.9833	0.158962
2016	220700	7439624	6526400	2.3731e+06	1208362	996505	551490	4897208	2845012	432453	2235018	2.52067e+08	1.82753e+06	1.12762e+08	2.29039e+06	24647.8	175770	14.0642	34.04	1.7502	10.9923	0.158962
2017	220700	8065728	6871300	2.37271e+06	1308896	999049	552050	3055652	1728043	704633	2729650	2.76065e+08	2.38583e+06	1.1991e+08	3.4505e+06	21899.5	223570	13.2955	33.09	1.61125	10.9152	0.158962
2018	220700	7017591	7161600	2.37651e+06	1207626	990675	552610	3279826	1915684	659242	2676698	3.00063e+08	2.94412e+06	1.27059e+08	4.61061e+06	25075.5	252750	15.1624	32.89	1.68762	10.8188	0.158962
2019	220700	7192371	7599000	2.37155e+06	1212152	994443	553170	3577341	2016613	731036	2696766	3.2406e+08	3.50241e+06	1.34208e+08	5.77072e+06	26433.2	278850	15.3234	46.3	1.96055	10.1866	0.158962
2020	220700	7046251	7969000	2.35922e+06	1216238	999514	553730	4412718	2479304	806662	2973915	3.48058e+08	4.06071e+06	1.41356e+08	6.93083e+06	21836.1	356340	14.3728	46.89	1.58878	10.2231	0.158962
2021	220700	7501696	8460000	2.35495e+06	1230822	1013907	554290	4508807	2604909	595117	2415020	3.72055e+08	4.619e+06	1.48505e+08	8.09094e+06	25325	480940	14.7044	47.68	1.94833	10.3114	0.158962
2022	220700	7612500	8796000	2.35926e+06	1217694	1023774	554850	5074517	3082739	741127	2708743	3.96053e+08	5.1773e+06	1.55654e+08	9.25104e+06	25705.8	650500	16.5327	47.93	1.88427	10.3802	0.158962
2023	220700	7810470	9158900	2.36348e+06	1238852	1034729	555410	4981768	3071004	928316	3109263	4.20051e+08	5.73559e+06	1.62802e+08	1.04112e+07	25856.6	694620	15.013	48.69	1.98923	10.405	0.158962
2008	220800	3123709	3144000	2.43171e+06	602707	455974	520200	1172299	663746	107392	604892	4.99758e+08	5.80587e+06	1.72931e+08	1.34611e+07	15633.7	70990	8.97818	39.79	1.17935	9.56999	0.158962
2009	220800	2512500	3349700	2.44334e+06	837666	635879	433080	1296063	708636	174188	810816	4.88706e+08	5.70898e+06	1.6898e+08	1.28326e+07	19778.4	68980	12.7941	39.86	1.50641	9.76379	0.158962
2010	220800	3390544	3590000	2.45499e+06	868488	642524	436560	1553099	902063	162796	921691	4.64985e+08	6.07211e+06	1.76823e+08	1.21942e+07	21357.1	86390	13.2525	39.99	1.45629	9.99739	0.158962
2011	220800	3288500	3860000	2.46633e+06	957432	748470	430840	1794800	1108938	186291	1150487	8.86773e+07	3.84923e+06	6.10636e+07	8.39534e+06	22018	98230	13.6018	39.9	1.67397	10.2178	0.158962
2012	220800	3469000	4163500	2.49766e+06	1026425	804811	431280	1999000	1329477	238774	1427077	1.17829e+08	4.10373e+06	7.01377e+07	4.98327e+06	19845.5	114870	12.1539	40.08	1.33844	10.3345	0.158962
2013	220800	4101759	4380800	2.52913e+06	988269	815087	431720	2170356	1419458	275301	1560377	1.46981e+08	3.85144e+06	7.92118e+07	8.80739e+06	19307	125770	12.6867	40.01	1.47584	10.4566	0.158962
2014	220800	4103500	4762700	2.53827e+06	1006540	837483	432160	2273227	1466854	349089	1829198	1.76133e+08	259773	8.82859e+07	4.17383e+06	22877.9	113700	13.4269	39.91	1.6451	10.4542	0.158962
2015	220800	4176215	5140000	2.52915e+06	1055907	894895	432600	2357875	1533176	433535	2030517	2.05285e+08	896187	9.736e+07	413737	19702.4	125690	11.12	43.14	1.38783	10.4794	0.158962
2016	220800	4139129	5221000	2.52746e+06	1055055	882554	433040	2230785	1380492	444746	2224702	2.34437e+08	1.5326e+06	1.06434e+08	1.72057e+06	23291.8	188780	13.0623	44.35	1.6617	10.4989	0.158962
2017	220800	4608370	5438500	2.53276e+06	858214	767433	433480	1955732	1233278	695486	2563527	2.63588e+08	2.16902e+06	1.15508e+08	3.02741e+06	21723.6	211930	13.1807	44.22	1.53812	10.4401	0.158962
2018	220800	4788510	5656000	2.53525e+06	911019	821487	433920	2120884	1357641	677284	2708541	2.9274e+08	2.80543e+06	1.24582e+08	4.33424e+06	22785.8	273970	14.599	44.02	1.63304	10.371	0.158962
2019	220800	5044958	5900000	2.53838e+06	967077	891199	434360	2265978	1335152	776683	2499874	3.21892e+08	3.44185e+06	1.33656e+08	5.64108e+06	23110.1	286220	15.2451	54.44	1.77264	10.1671	0.158962
2020	220800	5093357	6288900	2.5438e+06	980892	910772	434800	2742627	1545001	770487	2803285	3.51044e+08	4.07826e+06	1.42731e+08	6.94791e+06	27118.8	371220	17.8054	54.44	1.93178	10.2136	0.158962
2021	220800	5569220	6582000	2.5494e+06	990711	925607	435240	2811539	1548008	557595	2237351	3.80196e+08	4.71468e+06	1.51805e+08	8.25475e+06	26030.5	528670	15.0729	54.97	1.92205	10.2981	0.158962
2022	220800	5657500	6926900	2.55728e+06	1011618	943761	435680	3157702	1771574	641797	2439212	4.09348e+08	5.35109e+06	1.60879e+08	9.56159e+06	24386	701950	15.7713	43.3	1.84228	10.3552	0.158962
2023	220800	5804974	7302300	2.56327e+06	1027306	954826	436120	3083025	1818454	950910	2893478	4.385e+08	5.98751e+06	1.69953e+08	1.08684e+07	26576.8	804800	15.3893	56.2	1.96239	10.3947	0.158962
2008	230100	12179262	5837500	3.77904e+06	1828234	1707539	288570	5698471	2894699	286064	3012700	390705000	6190000	1.82677e+08	11512000	49778.2	114170	29.2489	48.18	3.7604	10.2742	0.177162
2009	230100	13147021	6816600	3.78299e+06	1944042	1860329	298750	6510082	3563090	319528	3484100	423767000	5953000	1.9063e+08	12399000	49006.8	45980	30.4209	48.11	3.73676	10.3743	0.177162
2010	230100	14493875	7531500	3.77966e+06	1983535	1900348	304300	7490612	4252458	628429	4529700	436298000	6283000	1.98582e+08	13102000	50563	87840	28.4165	47.96	3.57608	10.5171	0.177162
2011	230100	16171933	8067300	3.77335e+06	1990771	1894417	729500	8785919	5005849	626339	5571400	449536000	6441000	2.06535e+08	14164000	52466	64750	32.2258	47.97	3.91536	10.6621	0.177162
2012	230100	17350051	8911100	3.76749e+06	2024245	1923899	729050	9912304	5655703	633220	6435800	471401000	6707000	2.14487e+08	15695000	53302.1	130980	30.9283	48.21	3.88242	10.732	0.177162
2013	230100	13949308	9267300	3.76117e+06	2033375	1932329	728600	10895184	6117096	690618	7097800	485584000	6550000	2.15776e+08	16631000	58533.1	204470	38.3624	48.31	4.28254	10.828	0.177162
2014	230100	14271730	9772700	3.74879e+06	2043726	1945812	728150	11714720	6471421	668188	7400800	489878000	6289000	2.22472e+08	17038000	58424.5	148980	34.064	48.75	4.50388	10.8984	0.177162
2015	230100	14436679	10245000	3.72684e+06	2038437	1943598	745670	12558470	7006136	960878	8248400	466880000	7421000	2.21929e+08	13553000	61941.9	167910	38.2055	48.3	4.43013	10.9991	0.177162
2016	230100	13293452	10390300	3.71529e+06	2008522	1897635	783300	12965155	7159936	1187507	8762900	456393000	7363000	2.22427e+08	13169000	62988.2	296910	34.9341	48.62	4.55157	11.0576	0.177162
2017	230100	1.23338e+07	10679300	3.70243e+06	2047304	1.82301e+06	794900	11232469	6651737	1074753	9584700	447623000	6365000	2.24192e+08	13088000	64346.4	355270	39.2425	48.57	4.39227	11.0901	0.177162
2018	230100	1.20255e+07	10990000	3.69057e+06	1954024	1.88964e+06	806730	9876819	6359447	1140884	9621700	433896000	5953000	2.24851e+08	12154000	63855.1	381210	38.7828	49.1	4.88995	11.1002	0.177162
2019	230100	1.22037e+07	11489600	3.6856e+06	2024266	1.95609e+06	808080	1.07651e+07	6.79221e+06	1145854	11011400	420284000	4638000	2.09531e+08	11096000	68123.2	356410	44.4464	49.8	4.78433	10.9186	0.177162
2020	230100	1.22281e+07	11859600	3.69079e+06	2.02921e+06	1.97467e+06	789780	11686479	7455409	1188827	11622500	423930000	3346000	2.11682e+08	9206000	65661.6	494210	42.0599	70.61	4.86534	10.9104	0.177162
2021	230100	1.26965e+07	12209200	3.70277e+06	2.03356e+06	1985538	800960	11960148	7711373	875164	9920800	441615800	2443000	2.14511e+08	9303000	71926.7	519520	46.2141	76.94	4.9084	10.9465	0.177162
2022	230100	1.27141e+07	12585100	3.72764e+06	2.03737e+06	2.00449e+06	708795	12592497	8260832	1106346	10655000	466791000	2224600	2.13277e+08	8765000	73959.1	699570	45.9588	56.26	5.30496	10.9751	0.177162
2023	230100	1.15039e+07	12773000	3.74929e+06	2.04072e+06	2.00658e+06	616630	11743269	7702405	1188432	10807000	456854900	2.0062e+06	2.10944e+08	8227000	73436.4	848950	47.1841	56.14	5.01142	10.9905	0.177162
2008	230200	7903111	4730800	5.38022e+06	2.26203e+06	1804367	26240	2920329	1759060	141900	1156600	203700000	6676000	203176800	8.0398e+06	29616.1	154900	17.4982	35.96	1.96713	9.36722	0.177162
2009	230200	8389025	5307800	5.39846e+06	2.34361e+06	2111493	29620	3020887	1841600	214099	1528681	206708000	6550000	207864000	8.8554e+06	29147.5	199410	18.9654	35.66	2.15204	9.39941	0.177162
2010	230200	9879469	5925800	5.42014e+06	2425200	2144927	33000	3623450	2202406	419859	2080881	250452000	6424000	212551200	9671000	29052.6	144350	16.6015	35.83	2.08771	9.64847	0.177162
2011	230200	10761095	6400200	5.44788e+06	2.43117e+06	2185414	805618	4528546	2691075	418345	2402541	274214000	6298000	217238400	10125000	33451.4	190090	21.1167	35.65	2.30802	9.84076	0.177162
2012	230200	13445535	6927900	5.47822e+06	2.43713e+06	2188923	891689	5256595	3298074	569737	2637766	278801000	6172000	221925600	9569000	30077.4	302030	16.7352	35.63	2.09331	9.95395	0.177162
2013	230200	11088733	7351500	5.49654e+06	2443102	2220555	1.00035e+06	5164109	3071325	548293	2821949	286959000	6046000	226612800	9013000	31790.8	329890	18.1266	35.48	2.26943	10.0029	0.177162
2014	230200	11497760	7790100	5.49611e+06	2435422	2243585	33010	5498649	3184395	605554	3136822	296210000	5920000	231300000	9346000	33327.3	246990	19.019	35.5	2.23245	9.99245	0.177162
2015	230200	11789249	8138100	5.48044e+06	2438628	2257031	106830	5789107	3318172	791805	3877828	305855000	6205000	238310400	9478000	37626	299120	21.5119	38.15	2.62632	10.0486	0.177162
2016	230200	10808488	8298500	5.46586e+06	2444588	2242937	844460	5752866	2944130	992217	4131064	4.73826e+08	6207000	250626000	6207000	38253	309330	22.7109	38.42	2.64433	10.1008	0.177162
2017	230200	1.01985e+07	8398600	5.45457e+06	2454370	2.18486e+06	856100	5341759	2866460	1200579	4639317	305720000	5367000	240544800	9219000	35979.3	402180	22.3765	38.82	2.50914	10.1258	0.177162
2018	230200	1.1249e+07	8575900	5.44302e+06	2.29153e+06	2.21898e+06	875600	5942493	3371786	1136560	4483421	281285000	5045000	267688800	9585000	40466.2	426240	24.3983	38.83	2.8723	10.138	0.177162
2019	230200	1.18137e+07	8792600	5.42779e+06	2.44665e+06	2.39382e+06	886630	6.58469e+06	3.56356e+06	1243465	4825811	311006000	4795000	269168400	9814000	37182.6	500400	22.0789	38.64	2.58751	9.97223	0.177162
2020	230200	1.18204e+07	9183300	5.41085e+06	2527400	2.46911e+06	955470	7527777	3935414	1326794	5289246	302153000	4771000	264967200	9494000	40110.4	649760	23.2515	53.6	2.84414	10.0427	0.177162
2021	230200	1.23625e+07	9248200	5.41706e+06	2505600	2.44403e+06	958760	7412822	3848127	1301572	5109563	353231880	1327000	266558400	7554000	39994.4	773570	24.3177	37.95	2.90783	10.073	0.177162
2022	230200	1.15859e+07	9478000	5.44601e+06	2.52113e+06	2.45042e+06	990340	8.05505e+06	4248425	1413170	5676505	345528000	1310000	261686400	7356000	39002.8	1009730	24.732	37.83	2.69099	10.1539	0.177162
2023	230200	1.19323e+07	9685400	5.46079e+06	2.5521e+06	2.48595e+06	1.02192e+06	7.84147e+06	4.14655e+06	1550790	6058974	342723680	1293000	256814400	7158000	40833.8	1183920	24.8281	37.76	2.96886	10.1409	0.177162
2008	230300	2018942	1447000	1.8902e+06	414114	366683	109330	788644	506435	56700	583500	39027000	1.29914e+06	9.06823e+07	4.5435e+06	30235.3	140900	19.8657	62.89	2.10521	9.71427	0.177162
2009	230300	2147667	1541100	1.88684e+06	476861	458400	120160	868456	561109	73039	693863	41228000	1.50682e+06	9.48342e+07	4.70025e+06	27073.3	149750	17.5211	62.91	2.0486	9.82837	0.177162
2010	230300	2554994	1624600	1.88541e+06	476164	459201	130500	1064509	716631	122218	855626	43346000	1.71451e+06	9.8986e+07	4.85699e+06	28744.8	186040	18.79	63.29	2.09087	10.0066	0.177162
2011	230300	2850162	1754200	1.88431e+06	476183	459964	174540	1357631	890282	125026	1048768	44593000	1.92219e+06	1.03138e+08	5.01373e+06	29020.4	205690	17.6908	63.73	2.16438	10.1993	0.177162
2012	230300	3251180	1893900	1.88455e+06	484947	472277	170320	1656068	1094325	156206	1164598	45902000	2.12988e+06	1.0729e+08	5.17047e+06	33522.5	224850	21.5084	63.87	2.55143	10.3522	0.177162
2013	230300	2876323	2082800	1.88142e+06	492667	481337	166100	1678960	1052525	148362	1193977	47407000	2.11871e+06	1.07936e+08	5.38514e+06	35594.3	304190	23.1685	64.07	2.45925	10.3286	0.177162
2014	230300	3062877	2179400	1.87926e+06	492891	482422	161880	1842317	1142059	216157	1362001	48447000	2.15524e+06	1.11525e+08	5.60181e+06	36960.1	307530	20.577	64.07	2.67494	10.2437	0.177162
2015	230300	3094029	2331400	1.87609e+06	491423	479199	161500	1947776	1198750	191501	1486844	51985000	2.12674e+06	1.11719e+08	5.32513e+06	32543.3	316380	19.9093	64.26	2.35185	10.2515	0.177162
2016	230300	2735462	2420000	1.87404e+06	442949	433325	165660	1952056	1077308	223073	1719421	1.62457e+08	2.09128e+06	1.12195e+08	5.30109e+06	33768.1	303690	20.0213	64.82	2.26328	10.2626	0.177162
2017	230300	2.39757e+06	2500700	1.869e+06	431128	421478	169820	1.65936e+06	1.03079e+06	243993	1844652	49402000	2.00319e+06	1.13173e+08	5.34557e+06	38294.7	28110	23.49	64.5	2.6534	10.3041	0.177162
2018	230300	2.79547e+06	2644600	1.8641e+06	487206	477811	174700	3305761	2564647	244368	1612540	55028000	1.85119e+06	1.13572e+08	4.76245e+06	40604.2	359680	26.4438	66.01	2.85016	10.3396	0.177162
2019	230300	5.77501e+06	2826600	1.86077e+06	934372	919100	203850	3.60298e+06	2.75253e+06	287749	1734778	192982000	1.62411e+06	1.05787e+08	4.12459e+06	42126.4	367650	23.6391	66.35	3.11366	10.394	0.177162
2020	230300	5.79573e+06	3138000	1.86183e+06	930620	913672	510740	3.98263e+06	3.09273e+06	278087	2153462	173416500	1.54752e+06	1.06783e+08	3.90311e+06	42469.8	416610	27.4537	72.7	3.01319	10.4415	0.177162
2021	230300	6.01572e+06	3118200	1.86532e+06	960290	934618	817630	3.78299e+06	2.9127e+06	259392	1805532	170463350	1.17029e+06	1.08063e+08	3.66514e+06	41499.6	442070	24.5859	73.2	3.11941	10.508	0.177162
2022	230300	6.04399e+06	3200700	1.87417e+06	981246	957346	1.12452e+06	3.67742e+06	2.78334e+06	427562	2234863	168942000	1.08818e+06	1.07231e+08	3.52059e+06	42662.6	478560	25.4729	73.9	2.89974	10.6164	0.177162
2023	230300	6.05309e+06	3415300	1.88528e+06	984980	965290	1.43141e+06	3.57883e+06	2.81693e+06	381904	2376472	167785480	1.08731e+06	1.0607e+08	3.51777e+06	42370.6	550320	25.1019	74.66	3.18488	10.6004	0.177162
2008	230400	617389	497300	1.11681e+06	156639	152491	40700	261666	141954	27700	302500	29686000	330000	22401600	1333000	29708.8	114490	16.5921	80.61	2.22273	9.73393	0.177162
2009	230400	665950	527800	1.11662e+06	189172	185843	70400	297238	162847	34576	411471	33878000	334000	22155600	1303000	31050.1	114360	20.3643	80.64	2.27767	9.82516	0.177162
2010	230400	785821	650400	1.11805e+06	194295	190326	96900	354811	203348	64429	512758	36128000	338000	21909600	1273000	30524.7	133490	17.3974	80.94	2.10367	10.0435	0.177162
2011	230400	1038255	712700	1.1196e+06	200634	195395	150760	446636	267235	68983	618066	42414000	342000	21663600	1243000	32780	145810	19.4945	80.72	2.38513	10.2672	0.177162
2012	230400	1136631	822000	1.11979e+06	203236	197929	149180	518393	326827	90908	797483	41991000	346000	21417600	1213000	30102	198670	17.7178	80.75	2.21864	10.4048	0.177162
2013	230400	875763	884800	1.11817e+06	203266	200398	147600	500412	303972	87140	755464	41888000	350000	21171600	1183000	30475.2	250510	16.9923	80.8	2.07408	10.2984	0.177162
2014	230400	1001556	1024900	1.11542e+06	203786	201965	146020	518895	349852	110554	746562	42100000	354000	20925600	1153000	36502	267770	21.723	80.91	2.5847	10.0961	0.177162
2015	230400	1039037	1077100	1.11336e+06	203726	201259	145400	541758	361157	129185	898358	43600000	358000	20679600	1123000	33816.9	262260	19.5117	81.3	2.26417	10.1325	0.177162
2016	230400	1027724	1142700	1.11213e+06	204077	201351	143045	514726	335168	131016	1063289	43056000	362000	20433600	1093000	36286.1	263130	21.391	81.7	2.50914	10.1423	0.177162
2017	230400	889119	1144500	1.11054e+06	188284	186634	140690	520579	350795	129774	1111987	43389000	417000	19482000	1103000	38550.9	282520	21.5331	82.52	2.88181	10.2403	0.177162
2018	230400	1.00717e+06	1178300	1.10903e+06	188439	199376	135100	1740290	1130895	143779	1156562	43214000	366000	19358400	1057000	40555.8	298120	26.4412	82.6	2.91798	10.2736	0.177162
2019	230400	3.11915e+06	1254400	1.10816e+06	188439	517501	135120	1.88393e+06	1.20009e+06	184823	1429543	43765000	370000	19795200	977000	39504.4	314870	25.9932	81.42	2.90873	10.4425	0.177162
2020	230400	3.17245e+06	1418700	1.10699e+06	188439	531408	136510	2105500	1335020	197682	1368276	44098000	372000	19240800	956000	41682.7	338140	26.9595	82.63	2.94401	10.4646	0.177162
2021	230400	3.2879e+06	1364600	1.10697e+06	188439	545435	137900	2.00591e+06	1.2536e+06	244822	1212898	45674710	331980	19719720	996060	42424.5	327200	23.9644	81.2	3.19222	10.5153	0.177162
2022	230400	3.17178e+06	1422300	1.10933e+06	188439	550279	139290	2.04835e+06	1.28437e+06	252696	1347820	44342000	315770	18906156	953570	44890	349860	26.1971	81	3.41066	10.6702	0.177162
2023	230400	3.22093e+06	1454800	1.11133e+06	188439	560055	140680	2.05761e+06	1.31569e+06	202017	1368999	50419650	299560	1.80926e+07	911080	43314.9	375980	24.4674	80.85	3.25923	10.6174	0.177162
2008	230500	1742309	1015700	1.94712e+06	401967	351462	48200	810685	438690	45200	418000	48490000	1.34794e+06	9.40597e+07	4.71258e+06	30050.4	163840	16.6359	62.27	2.178	9.75752	0.177162
2009	230500	1941942	1119500	1.94914e+06	415412	376680	48280	949846	506089	66262	587837	51915000	1.56268e+06	9.83372e+07	4.8738e+06	27840.5	164810	18.3736	62.48	1.88481	9.89312	0.177162
2010	230500	2268475	1248400	1.95212e+06	419130	390001	54500	1157187	651226	111947	706680	55272000	1.77742e+06	1.02615e+08	5.03502e+06	30642.7	176540	18.5957	63.78	2.19858	10.1715	0.177162
2011	230500	2545102	1388300	1.9529e+06	420906	398447	71020	1463455	745741	102118	818489	61012000	1.99216e+06	1.06892e+08	5.19623e+06	28317.1	212120	16.8305	63.98	2.00342	10.4122	0.177162
2012	230500	2805970	1562900	1.95271e+06	420674	398941	76860	1695482	856609	127860	994067	62158000	2.2069e+06	1.1117e+08	5.35745e+06	31954.6	285880	20.5952	64.29	2.28984	10.5346	0.177162
2013	230500	2602519	1692300	1.95025e+06	420906	402138	82700	1804554	848776	132958	1028572	64029000	2.19622e+06	1.11885e+08	5.58214e+06	29895.2	341650	18.0421	64.31	2.25658	10.5202	0.177162
2014	230500	2787498	1767400	1.94825e+06	420906	404517	88540	1496549	860277	134496	1034518	66268000	2.23437e+06	1.15619e+08	5.80747e+06	37083.2	344120	21.8069	64.31	2.60013	10.2764	0.177162
2015	230500	2779402	1858800	1.94594e+06	411244	394495	96660	1374955	859830	152132	1168033	68355000	2.20591e+06	1.15878e+08	5.52338e+06	31753.4	359870	17.5606	57.66	2.33644	10.2885	0.177162
2016	230500	2562200	1956000	1.94465e+06	413570	393848	102135	1322535	828980	209288	1307304	1.68579e+08	2.17008e+06	1.16422e+08	5.50084e+06	35526.1	384650	20.2977	58.27	2.40096	10.3144	0.177162
2017	230500	2.10619e+06	2044600	1.943e+06	402121	385555	107610	1275430	876846	242537	1512444	67949000	2.0825e+06	1.17654e+08	5.55721e+06	39298.3	395340	23.8579	66.27	2.60133	10.8046	0.177162
2018	230500	2.145e+06	2101300	1.94011e+06	403098	394792	102500	3144057	2423398	216026	1501267	70154000	1.92667e+06	1.18202e+08	4.95663e+06	38462.7	478920	21.6006	64.61	2.8203	10.4901	0.177162
2019	230500	5.65636e+06	2164000	1.93975e+06	403989	969318	102480	3.40793e+06	2607850	271864	1750379	186712000	1.69304e+06	1.10278e+08	4.29966e+06	36836.2	528870	23.1884	65.35	2.75997	10.427	0.177162
2020	230500	5.67509e+06	2724500	1.94061e+06	404801	959847	102260	3751901	2926960	272464	1788158	185975000	1.613e+06	1.11301e+08	4.06826e+06	39107	609950	24.9423	68.4	2.83298	10.4784	0.177162
2021	230500	5.93291e+06	2397700	1.94372e+06	405541	997747	102040	3561922	2726068	260647	1502829	228546240	1.21947e+06	1.12604e+08	3.81917e+06	43230.9	637700	27.8622	68.4	3.18138	10.5365	0.177162
2022	230500	5.97248e+06	2421800	1.95384e+06	406214	1.01723e+06	101820	3661100	2893969	286336	1727953	229760000	1.13444e+06	1.11789e+08	3.67024e+06	40202.6	705160	24.1555	69.2	2.84333	10.6203	0.177162
2023	230500	6.23601e+06	2451700	1.96608e+06	406828	1.03232e+06	101600	3.72336e+06	3.03582e+06	342598	1984343	230311510	1.13391e+06	1.10616e+08	3.66854e+06	44138.3	771640	28.447	70.1	3.24815	10.5858	0.177162
2008	230600	3366455	2277000	2.0451e+06	634134	477991	348300	1431512	653478	83700	1277500	80705000	1.39416e+06	9.78862e+07	4.90728e+06	27335.4	40670	17.1972	49.35	1.90603	11.2909	0.177162
2009	230600	3940523	2464800	2.0527e+06	693526	598079	423810	1653243	753486	110536	1419862	111311000	1.63154e+06	1.0293e+08	5.10283e+06	31354.8	3330	19.74	49.59	2.30251	11.2341	0.177162
2010	230600	5057278	2672700	2.06e+06	724415	654348	469900	2123490	1013740	168646	1642238	111360000	1.86892e+06	1.07973e+08	5.29838e+06	30454.6	13440	17.5453	50.39	2.30149	11.5488	0.177162
2011	230600	5543335	2834600	2.06478e+06	733510	648692	551720	2710741	1264093	209521	2170242	117749000	2.10629e+06	1.13016e+08	5.49393e+06	29621.8	34370	16.4219	50.95	2.12322	11.7971	0.177162
2012	230600	6500033	2993400	2.07372e+06	751418	672558	512360	3101025	1535570	249352	2349285	121966000	2.34367e+06	1.18059e+08	5.68948e+06	33285.5	38720	18.431	51.38	2.44912	11.8642	0.177162
2013	230600	5194214	3151400	2.08363e+06	751106	676790	473000	3573025	1503768	249102	2342730	117991000	2.34642e+06	1.19537e+08	5.96391e+06	30682.3	60510	20.3257	51.6	2.1817	11.9047	0.177162
2014	230600	5334144	3248600	2.08482e+06	757398	692010	433640	3980024	1681916	253838	2362648	119719000	2.39099e+06	1.23724e+08	6.21456e+06	34451.4	61250	21.9	52.1	2.49692	11.9032	0.177162
2015	230600	5378577	3363000	2.07511e+06	752253	705323	462300	4045826	1703961	304512	2675183	132432000	2.35234e+06	1.23571e+08	5.89002e+06	35200.5	73570	21.5245	51.3	2.41187	11.5927	0.177162
2016	230600	4446755	3415300	2.06593e+06	752533	694219	493485	4036401	1583823	318708	2635331	1.79092e+08	2.30541e+06	1.23683e+08	5.84388e+06	33544.1	81310	20.4989	52.4	2.2974	11.457	0.177162
2017	230600	4.21054e+06	3585500	2.06131e+06	719260	651009	524670	3921278	1707137	420040	2946439	134123000	2.20931e+06	1.24818e+08	5.8956e+06	34123.7	122550	21.6182	52.9	2.43037	11.4946	0.177162
2018	230600	4.12161e+06	3683400	2.05627e+06	712000	658825	539300	4009282	1781502	402135	3006786	130070000	2.04203e+06	1.25279e+08	5.2534e+06	38257.2	136590	24.4444	52.82	2.80277	11.5387	0.177162
2019	230600	4.53308e+06	3757200	2.04235e+06	759000	698538	542640	4.48317e+06	1885810	382336	3159091	127271600	1.78259e+06	1.16111e+08	4.52708e+06	41812.2	165840	26.5072	52.8	3.14071	11.4554	0.177162
2020	230600	4.53418e+06	3970200	2.02404e+06	780000	706257	552630	5.02357e+06	2.14801e+06	396067	3369001	121444800	1.68235e+06	1.16087e+08	4.24317e+06	39652.6	203880	23.6317	72.5	2.79958	11.3456	0.177162
2021	230600	4.59987e+06	3763300	2.02085e+06	794267	701172	562620	5160477	2317759	324832	3368514	120831190	1.26786e+06	1.17073e+08	3.97072e+06	42650.6	287780	27.0598	72.48	3.0758	11.4755	0.177162
2022	230600	4607528	3518900	2.03212e+06	803754	709214	572610	5337041	2496250	426726	3677299	120689000	1.17989e+06	1.16268e+08	3.8173e+06	38418.1	348990	24.1868	72.88	2.82853	11.6409	0.177162
2023	230600	4.60994e+06	4249800	2.04588e+06	812842	709890	582600	5154854	2432170	457018	3689535	119000300	1.17993e+06	1.15106e+08	3.81743e+06	43545.8	448380	27.6277	73.9	3.14036	11.5972	0.177162
2008	230700	640899	477900	463327	205477	184199	29900	759884	379504	83100	374000	16276000	709000	21388800	1.1436e+06	29361.9	3740	19.1762	85.7	2.24611	9.54865	0.177162
2009	230700	692305	512300	462657	240693	228284	25000	855727	427338	93772	512960	19432000	637000	21903600	1.16603e+06	26616.3	6620	16.755	85.77	1.87693	9.51389	0.177162
2010	230700	803147	594700	460527	240693	228168	26100	1036916	561253	109540	637255	19570000	565000	22418400	1.18845e+06	29139.7	22750	16.8727	85.93	2.11654	9.67699	0.177162
2011	230700	891924	663700	455081	243453	231042	43860	1192329	666876	106485	788943	22786000	493000	22933200	1.21087e+06	30395.5	16210	18.386	85.95	2.30471	9.80838	0.177162
2012	230700	966909	685400	449516	243241	230207	46030	1429210	830345	108585	816993	23880000	421000	23448000	1.23329e+06	31175.5	23190	17.7469	86.81	2.17713	9.94124	0.177162
2013	230700	688421	750500	447636	241553	229791	48200	1549469	888420	119062	997240	24242000	349000	23962800	1.28125e+06	35532.8	30230	22.9699	86.86	2.49262	10.0472	0.177162
2014	230700	763650	771900	445235	239491	229279	50370	1635510	934045	162336	1029241	25325000	277000	24477600	1.32719e+06	33264.2	32230	21.6647	86.97	2.24103	9.9516	0.177162
2015	230700	774319	802800	438176	239938	231361	48770	1652540	937108	166727	1441862	24980000	289000	25002000	1.24373e+06	33206	34130	18.657	57.05	2.40748	9.9272	0.177162
2016	230700	739429	805400	436389	241046	229464	49965	1574943	859613	212920	1269338	3.78298e+07	295000	24540000	1.23441e+06	33015.5	179150	19.5266	58.37	2.28864	9.96597	0.177162
2017	230700	655445	748300	435311	215575	205863	51160	1590161	888323	248765	1481757	23516000	267000	24319320	1.24504e+06	36378.9	42940	20.1338	81.19	2.58924	10.0103	0.177162
2018	230700	780511	768700	434950	207391	231992	53700	1748132	1034639	256421	1566785	22571000	248000	25323240	1.11122e+06	38765.8	47140	23.6267	80.94	2.86846	10.0878	0.177162
2019	230700	854709	812000	435874	202572	272279	61260	1.91018e+06	1109067	271313	1750626	26082500	380437	27502800	966160	38497	55810	21.5711	81.7	2.88352	10.1923	0.177162
2020	230700	885723	972100	438301	199699	272327	57010	2022127	1175249	184184	1985662	24299700	364308	25238400	918848	41713.9	65400	23.885	84.7	2.85477	10.1934	0.177162
2021	230700	1.01314e+06	965200	443563	197974	278397	52760	2089729	1222759	196112	1894161	24075680	278288	25938000	871547	38044.3	76750	21.5781	84.65	2.74257	10.2934	0.177162
2022	230700	936473	989800	453542	196933	283818	48510	2.17298e+06	1.28725e+06	237578	2058798	24769000	263336	26587200	851969	40371.3	80770	24.4014	86.9	2.95954	10.3752	0.177162
2023	230700	1.00999e+06	1040300	462169	196303	289308	44260	2160796	1341541	286904	2256528	25616860	266550	27236400	862368	38842.9	93950	22.031	87.2	2.80014	10.4184	0.177162
2008	230800	4521841	2129800	3.7872e+06	1132662	1018779	190760	1609725	1067404	108988	706831	163494000	3205000	104707200	5953000	28910.5	211610	16.2865	49.29	2.04217	9.67005	0.177162
2009	230800	4761116	2566900	3.78572e+06	1253348	1190464	202150	1863616	1214489	145959	884835	173376000	3162000	112602000	6296000	28042.7	249930	15.5285	49.21	2.13347	9.74983	0.177162
2010	230800	5755961	2859100	3.78679e+06	1255495	1201016	257100	2284462	1524316	269916	1218078	185550000	3119000	120496800	6639000	31207	219760	17.6211	49.99	2.38859	9.91309	0.177162
2011	230800	7300180	3336800	3.79155e+06	1287015	1237121	408780	3037501	2051719	268331	1422991	201212000	3076000	128391600	6982000	29679.3	279970	18.0128	50.29	2.24713	10.1251	0.177162
2012	230800	8423231	3368600	3.7971e+06	1125854	1076937	426790	3429091	2329343	280176	1606535	202719000	3033000	136286400	7325000	29972.8	348470	19.5232	50.1	2.17806	10.2374	0.177162
2013	230800	6683238	3618600	3.80193e+06	1125856	1083616	444800	3829052	2497528	395011	1836680	197583000	2990000	144181200	7668000	33098.1	397510	20.6205	50.33	2.27574	10.3957	0.177162
2014	230800	7013279	3877200	3.80679e+06	1125833	1093046	462810	4437404	2960075	339929	1875138	216833000	2947000	152076000	8011000	36210	414160	23.7037	50.57	2.68096	10.365	0.177162
2015	230800	7105700	4232700	3.8086e+06	1125571	1102769	458670	4263967	2744103	400480	2120733	237768000	2904000	159970800	8354000	35958	435940	23.1469	58.77	2.72723	10.4372	0.177162
2016	230800	6734914	4631300	3.80858e+06	1122274	1081939	463705	4310681	2610532	610046	2556391	231313000	2842000	162508800	8510000	33147.1	463500	18.7463	58.46	2.41838	10.4774	0.177162
2017	230800	5.79358e+06	4806400	3.80598e+06	1.05485e+06	1.02171e+06	468740	3.76593e+06	2.37332e+06	582634	2550843	233928000	3224000	198460800	10117000	35627.4	543080	20.1724	55.33	2.686	10.6505	0.177162
2018	230800	6.83797e+06	5662400	3.80064e+06	1.04629e+06	1.19439e+06	607000	5915061	4506898	732712	2727936	239120000	3014000	195028800	9815000	37906.4	605770	23.5315	53.09	2.73881	10.679	0.177162
2019	230800	1.08854e+07	5883900	3.79796e+06	1.04004e+06	1.84582e+06	611940	6.32714e+06	4.70558e+06	843285	2979246	324489000	2768000	285088800	11268000	39242	647840	23.5803	52.2	3.00585	10.3966	0.177162
2020	230800	1.10395e+07	6263800	3.79843e+06	1.03546e+06	1.84823e+06	611020	7011178	5220111	911695	3417891	291285000	2969000	278833200	9348000	40897	800730	25.6957	65.2	3.07235	10.4696	0.177162
2021	230800	1.12942e+07	6539200	3.80372e+06	1.0321e+06	1.86966e+06	600220	6601131	4853873	795245	3366057	306806260	2444000	277804800	9087000	38404.1	898980	21.9744	65.17	2.86255	10.4854	0.177162
2022	230800	1.13193e+07	6749200	3.81641e+06	1.02964e+06	1.93846e+06	589420	6.85546e+06	5.06931e+06	956231	3598377	302318000	2383700	284792160	8858100	44115	954050	25.247	52.1	3.1664	10.5571	0.177162
2023	230800	11428446	6860200	3.83045e+06	1.02783e+06	1.95379e+06	578620	6.97972e+06	5.26219e+06	992751	3700794	297593130	2.3234e+06	291779520	8.6292e+06	39210.1	1146320	22.4356	51.9	2.92263	10.6005	0.177162
2008	230900	599183	414800	436428	152129	135218	13060	259100	154987	28300	312900	11939000	302277	2.10155e+07	1.05253e+06	28936.9	2270	16.1135	56.43	2.19957	9.94006	0.177162
2009	230900	645196	422200	435727	169070	156692	12940	290281	168205	41860	427139	14110000	348466	2.1895e+07	1.08498e+06	30619.1	4260	18.0428	56.75	2.10141	10.1339	0.177162
2010	230900	722106	456300	434070	175181	161013	13000	326182	195048	48766	485020	14473000	394656	2.27746e+07	1.11743e+06	29073.2	34740	18.8166	57.94	1.94347	10.4003	0.177162
2011	230900	758855	531500	432158	172414	157345	20620	363877	208022	52367	541303	17264000	440846	2.36542e+07	1.14988e+06	28310.5	32260	16.2399	58.67	2.03844	10.4113	0.177162
2012	230900	877252	559900	430938	177528	162379	20160	412350	236068	58345	608579	13683000	487036	2.45337e+07	1.18232e+06	33140	41360	19.7743	58.93	2.44485	10.3843	0.177162
2013	230900	794300	601000	429472	177833	163803	19700	412350	236068	74108	631117	27807000	483638	2.46385e+07	1.22926e+06	35795.3	43170	21.866	58.78	2.39201	10.1733	0.177162
2014	230900	905356	641800	428061	177885	164375	19240	461417	247713	66788	620773	32948000	490926	2.54033e+07	1.27599e+06	36269.1	49530	21.5879	58.82	2.67324	10.0979	0.177162
2015	230900	940808	688000	426126	178464	163981	19600	504952	256382	93409	724605	31115000	483056	2.53753e+07	1.20952e+06	34219.8	53600	20.563	56.69	2.59368	10.1498	0.177162
2016	230900	923970	691200	425088	181296	160529	20135	476449	222870	117592	916210	3.68501e+07	474364	2.54491e+07	1.20244e+06	37432	55590	22.9299	58.07	2.8422	10.2066	0.177162
2017	230900	821254	720600	423252	180754	160196	20670	463857	234492	122363	882841	34465000	453641	2.56291e+07	1.21055e+06	39410.1	66780	23.7355	62.24	2.82104	10.2739	0.177162
2018	230900	852755	798200	421677	180604	164089	20900	618487	346573	108742	942751	38719000	418757	2.5691e+07	1.07731e+06	41196.7	80020	23.7248	62.05	3.01817	10.3764	0.177162
2019	230900	1.02047e+06	927700	421217	180586	209170	22850	666158	361490	149929	1365975	38302500	367644	2.39468e+07	933670	35376.3	75190	22.5918	61.9	2.52519	10.309	0.177162
2020	230900	1.0233e+06	965200	421310	180584	205917	23220	727146	416125	124014	1250084	35862250	350186	2.41638e+07	883229	36627.1	92130	23.0396	77.16	2.69338	10.2075	0.177162
2021	230900	1.02387e+06	974100	421771	180584	209241	23590	753760	451146	110220	848744	31779270	264616	2.44343e+07	828730	41126.4	104140	26.0482	61.5	2.819	10.3353	0.177162
2022	230900	1.02861e+06	994500	424086	180584	210969	23960	843673	529323	136786	1027293	31448000	246233	2.42641e+07	796637	45300.5	122760	27.4109	61.4	3.45319	10.501	0.177162
2023	230900	1.04879e+06	1015300	428414	180584	211116	24330	824573	518033	142277	1035681	30169250	247082	2.41036e+07	799383	41989.6	137810	26.5949	61.2	2.87816	10.4873	0.177162
2008	231000	1901033	1397200	1.20469e+06	477505	392192	66610	1374879	917797	67988	752642	63960000	2650000	52998000	3614000	27909	44490	15.8603	54.97	2.06247	9.839	0.177162
2009	231000	2209589	1526200	1.19958e+06	566498	490601	74370	1605015	1113902	107636	1031683	74433000	2713000	53726400	3512000	26893.7	21140	17.3	54.74	1.8047	10.0544	0.177162
2010	231000	2545312	1646700	1.19245e+06	588192	498116	76800	2017927	1477109	170831	1360930	76107000	2776000	54454800	3410000	27190.4	39450	15.8039	54.83	2.10019	10.2509	0.177162
2011	231000	2505513	1786300	1.17774e+06	626673	536435	80980	2501919	1815743	169529	1628952	78034000	2839000	55183200	3308000	28648.9	31470	17.6597	55.01	2.0302	10.4686	0.177162
2012	231000	2982980	2040900	1.15729e+06	632473	532326	82040	3079486	2331515	200615	1828599	81444000	2902000	55911600	3206000	33293.8	49120	19.7097	54.96	2.54097	10.5398	0.177162
2013	231000	2718294	2246700	1.14047e+06	635063	531399	83100	3202803	2436408	216948	1998037	84758000	2965000	56640000	3104000	32596.2	71430	18.9087	56.32	2.1799	10.7569	0.177162
2014	231000	2723092	2569400	1.13172e+06	646819	546963	84160	3482662	2614815	310801	2171800	87660000	3028000	57368400	3002000	36177.2	77940	21.8155	55.3	2.42636	10.7764	0.177162
2015	231000	2793196	2777100	1.12752e+06	645900	547735	92200	3794749	2900354	318414	2227531	87676000	3096000	57188400	2975000	33251.6	41040	19.3299	58.13	2.3021	10.8203	0.177162
2016	231000	2570210	2832200	1.12613e+06	651975	507234	97615	3891979	2953410	390998	2590112	88319000	3146000	57525600	2987000	32637.5	96080	21.4708	58.18	2.27594	10.8747	0.177162
2017	231000	2.4252e+06	2897700	1.12187e+06	651603	505490	103030	3151142	2297605	391849	2628995	87667000	3098000	58580400	2952000	38292	92430	22.5674	61.85	2.86591	10.873	0.177162
2018	231000	2.70885e+06	3109400	1.11887e+06	637574	576879	116200	2948292	2168900	336871	2487441	87723000	2982000	58868400	2903000	39769.3	91150	26.0671	60.32	2.95223	10.8531	0.177162
2019	231000	2.96629e+06	3211400	1.12136e+06	690982	628555	116160	3.247e+06	2.36169e+06	380632	2804360	92392000	2972000	60711600	2973000	40044.5	121120	22.7054	60.3	3.0539	10.4043	0.177162
2020	231000	2.96836e+06	3401400	1.13062e+06	705335	641419	116160	3604715	2600085	361644	2847840	92113000	2983000	61053600	2917000	41403.3	134670	23.2067	65.8	2.89971	10.4248	0.177162
2021	231000	2.97283e+06	3501200	1.14293e+06	715467	648151	116830	3883644	2887660	309359	2676642	90589960	2732300	62714160	2885360	44401.3	167960	25.801	65.81	2.96795	10.4874	0.177162
2022	231000	3.06108e+06	3592200	1.16443e+06	722939	654624	112100	4.22421e+06	3.20807e+06	372598	3147221	90520000	2683000	62984400	2830000	41428.8	194760	23.2385	60	3.09603	10.5564	0.177162
2023	231000	2.95035e+06	3664700	1.18415e+06	729864	659233	107370	4109424	3121359	481137	3518609	90535910	2633700	63030000	2796400	45333.3	282800	26.3425	59.9	3.03024	10.5354	0.177162
2008	231100	2023315	1802700	3.1864e+06	851587	814599	16560	934801	735827	73600	479300	80399000	2.16919e+06	1.52654e+08	7.65465e+06	26755.5	258050	17.6982	35.3	2.00829	9.3779	0.177162
2009	231100	2184795	2009100	3.19209e+06	1107708	1087885	21890	1041568	817600	91964	576947	97070000	2.54745e+06	1.60862e+08	7.97572e+06	28629.1	244440	17.0968	35.29	1.99786	9.46266	0.177162
2010	231100	2634362	2139300	3.20811e+06	1141542	1114964	31700	1258244	993036	226909	931076	117225000	2.92571e+06	1.6907e+08	8.29679e+06	30091.8	263420	17.9032	35.29	2.30569	9.61498	0.177162
2011	231100	3346807	2296600	3.23885e+06	1200810	1151900	54260	1685534	1347204	217267	946359	106918000	3.30397e+06	1.77279e+08	8.61786e+06	30380.4	315570	19.2767	35.3	2.17992	9.80373	0.177162
2012	231100	4044477	2413900	3.2581e+06	1210305	1158824	58380	2133367	1752438	253654	1151651	117604000	3.68222e+06	1.85487e+08	8.93893e+06	32866.8	419380	21.2635	35.49	2.2259	9.96106	0.177162
2013	231100	3236849	2599300	3.26294e+06	1222308	1185315	62500	2183801	1722296	323346	1324897	127083000	3.67447e+06	1.87193e+08	9.3394e+06	33941.1	463140	22.36	36.91	2.44204	10.031	0.177162
2014	231100	3308563	2725000	3.25208e+06	1232329	1212583	66620	2467647	1919966	349731	1413336	129568000	3.72968e+06	1.92995e+08	9.69402e+06	30985.5	460810	18.4307	42.07	2.2034	10.1151	0.177162
2015	231100	3362717	2853100	3.24082e+06	1260527	1242812	84150	2644899	2010084	462789	1628932	135631000	3.67379e+06	1.92987e+08	9.19879e+06	32380.5	485720	18.0394	60.81	2.20397	10.1908	0.177162
2016	231100	2954859	2964000	3.22876e+06	1298854	1266327	86875	2721786	1994710	527200	1703750	2.79896e+08	3.60304e+06	1.93299e+08	9.13319e+06	35085.3	197500	20.2734	61.3	2.34653	10.271	0.177162
2017	231100	2.74371e+06	3024300	3.22119e+06	1.11214e+06	1.07631e+06	89600	2735376	2012828	808238	2111421	133873000	3.45246e+06	1.95052e+08	9.21298e+06	33975.7	568880	19.7644	57.82	2.46696	10.321	0.177162
2018	231100	3.6688e+06	3134600	3.20988e+06	1293000	1.24809e+06	92300	4255037	3122253	814465	2140881	131531000	3.18765e+06	1.95564e+08	8.20067e+06	39285.8	607180	24.0651	58.44	2.82664	10.3663	0.177162
2019	231100	5.1699e+06	3298100	3.20713e+06	1.33109e+06	1.81614e+06	92270	4.64921e+06	3.39924e+06	695653	2232248	130786000	2.79923e+06	1.8233e+08	7.10894e+06	36315.2	635550	20.8475	58.76	2.42387	10.509	0.177162
2020	231100	5.17539e+06	3751100	3.21324e+06	1.36922e+06	1.829e+06	92250	5247133	3871763	782657	2563837	219843300	2.67079e+06	1.84292e+08	6.73619e+06	39702.8	672260	22.4245	65.2	2.8127	10.5821	0.177162
2021	231100	6.01359e+06	3892700	3.24265e+06	1.40738e+06	1.84098e+06	92230	5340349	4004055	813882	2604190	251150800	2.03441e+06	1.87854e+08	6.37141e+06	40637.4	759040	24.6718	65.21	3.04448	10.6302	0.177162
2022	231100	5.43814e+06	4158800	3.31404e+06	1.44553e+06	1.85839e+06	92210	5.23384e+06	3.95462e+06	921319	2787126	238447000	1.9242e+06	1.89613e+08	6.22536e+06	39795.4	897340	26.0477	65.71	2.95608	10.6787	0.177162
2023	231100	5.78106e+06	4380300	3.37081e+06	1.48364e+06	1866634	92190	4.8976e+06	3.67913e+06	1021977	2906825	259287350	1.94407e+06	1.8965e+08	6.28964e+06	41490.3	970130	25.1897	66.91	3.10838	10.6815	0.177162
2008	231200	10826821	2812200	3.76138e+06	1661503	1524119	321620	3323850	1732613	150800	1020000	278182000	2.59514e+06	1.81687e+08	9.10583e+06	28752.2	125670	18.7721	26.27	2.14066	9.14703	0.177162
2009	231200	11194326	3104600	3.777e+06	1759439	1702842	299240	3758341	1921181	229945	1252925	296180000	3.02374e+06	1.90537e+08	9.44482e+06	30967	79880	19.6335	26.8	2.10032	9.25373	0.177162
2010	231200	13456914	3458700	3.79239e+06	1785166	1736013	352600	4759407	2477736	391988	1671812	311028000	3.45234e+06	1.99387e+08	9.78382e+06	28401.4	108890	15.9583	26.32	1.99354	9.43439	0.177162
2011	231200	14569391	3855800	3.80445e+06	1850715	1789520	472220	6419457	3313670	397542	1985429	332745000	3.88094e+06	2.08237e+08	1.01228e+07	30716.3	102650	19.836	26.34	2.11448	9.65978	0.177162
2012	231200	16654357	4444500	3.81316e+06	1902050	1841831	475860	7650248	4123785	534817	2545405	343089000	4.30954e+06	2.17087e+08	1.04618e+07	31860.2	139640	18.3266	26.68	2.43837	9.85189	0.177162
2013	231200	13161678	4918000	3.81126e+06	1914469	1865904	479500	7907609	4087798	551712	2780953	345640000	4.29195e+06	2.1865e+08	1.09089e+07	35356.1	193110	21.7545	26.63	2.62923	9.96575	0.177162
2014	231200	13392664	5415900	3.80442e+06	1908431	1870626	483140	8476189	4405973	633767	2903292	353607000	4.36313e+06	2.25774e+08	1.13405e+07	34549.8	169640	21.8009	26.59	2.42917	9.97654	0.177162
2015	231200	13461429	5714500	3.78997e+06	1905836	1880583	520020	8933045	4653295	733519	3330592	361636000	4.29631e+06	2.25689e+08	1.07575e+07	33132	167260	21.0284	27.09	2.21558	10.0517	0.177162
2016	231200	12262876	6094300	3.77902e+06	1892644	1825218	557210	9259830	4531685	1089707	3798551	3.27597e+08	4.21709e+06	2.26242e+08	1.06897e+07	33905.8	294090	19.4835	27.6	2.30022	10.0958	0.177162
2017	231200	1.09084e+07	6528700	3.7748e+06	1.84872e+06	1.76237e+06	594400	9009156	4970134	1088850	4184027	367888000	4.04582e+06	2.28574e+08	1.07964e+07	33383.8	328110	21.289	25.34	2.3519	10.1393	0.177162
2018	231200	1.09945e+07	7205500	3.77348e+06	1.83907e+06	1.78898e+06	603100	8784104	5107387	1099461	4235636	343365000	3.74735e+06	2.29902e+08	9.64057e+06	38145.5	277930	23.559	25.21	2.53903	10.1638	0.177162
2019	231200	1.10724e+07	7795900	3.77005e+06	1.83102e+06	1.84077e+06	601770	9.55156e+06	5.34034e+06	1264939	4709672	330767000	3.29055e+06	2.14333e+08	8.3567e+06	37353.8	399030	22.015	25.03	2.7973	9.95665	0.177162
2020	231200	1.10814e+07	8286500	3.76224e+06	1.8243e+06	1.8297e+06	586330	1.05847e+07	5.86704e+06	1242787	5056660	320363000	3.12711e+06	2.15779e+08	7.8871e+06	40267.6	495280	23.7478	43.7	2.81793	10.0088	0.177162
2021	231200	1.15418e+07	8967000	3.76095e+06	1.81868e+06	1.81341e+06	570890	1.09067e+07	6.20576e+06	919767	3927647	317612890	2.35959e+06	2.17881e+08	7.38981e+06	39095.9	575120	23.4058	43.66	2.63727	10.0416	0.177162
2022	231200	1.1548e+07	9371800	3.77011e+06	1.81399e+06	1.81946e+06	555450	1.12774e+07	6.61251e+06	1033649	4608268	314000000	2.189e+06	2.15707e+08	7.08207e+06	41130.4	872340	23.6858	44.24	2.75654	10.1011	0.177162
2023	231200	1.18518e+07	9637700	3.77752e+06	1.81006e+06	1829140	540010	1.07944e+07	6.3251e+06	1210981	5133785	308046660	2.17864e+06	2.12533e+08	7.04854e+06	39916.5	1064860	23.8971	45.49	2.69263	10.1042	0.177162
2008	310000	1222700	953200	397331	396060	184250	234460	2826300	1392900	789700	25939200	143200000	7121000	166440000	8096000	19616.8	211580	48.3497	88.6	5.49339	11.4975	0.0647344
2009	310000	1353900	992300	392256	415400	215540	202320	2877600	1510000	1074500	29896500	125600000	6865000	157920000	7289000	21027.6	215510	51.8108	88.6	6.10527	11.5845	0.0647344
2010	310000	1321200	1040600	386221	415580	201160	201000	2962400	1599800	1519300	33028900	118400000	6577000	177960000	7038260	20667.7	242530	52.5447	89.27	6.27557	11.708	0.0647344
2011	310000	1361600	1056800	380893	420030	208290	213950	3282400	1698200	1615400	39148800	119700000	6167000	162960000	6295000	21664.8	568510	54.1262	89.3	5.92785	11.8148	0.0647344
2012	310000	1359800	1127300	374088	401640	208140	199020	3378100	1768000	2179700	41840200	109900000	5714000	144480000	5816900	22124.1	457820	57.576	89.31	6.21649	11.8596	0.0647344
2013	310000	1286500	1131700	364851	391300	190500	184090	3422900	1779300	1872500	45286100	107800000	5566000	156360000	5019000	23721.3	511190	56.1128	89.6	6.92783	11.9239	0.0647344
2014	310000	1271600	1177600	353284	369910	186660	184090	3437800	1754600	2023400	49234400	101500000	5335000	151560000	4666160	23588.8	634240	55.0965	89.57	6.44987	12.0065	0.0647344
2015	310000	1254100	1190100	339033	350640	181320	188210	3277100	1678600	2673700	61915600	99200000	4728000	161040000	4415470	23961.3	807280	59.7258	87.61	6.58987	12.0674	0.0647344
2016	310000	1117800	1223100	325843	303780	158480	189810	3008400	1465800	3274100	69189400	91300000	4536000	164280000	3912840	25868.6	642170	67.5118	87.89	7.76017	12.1773	0.0647344
2017	310000	997800	1218400	317753	284950	133140	190750	2926100	1464000	4565300	75476200	89000000	3800000	173880000	3522780	25507.9	684710	60.8892	87.71	7.46687	12.2574	0.0647344
2018	310000	1037400	939700	314600	282270	129870	190750	2895800	1500900	4698800	83515400	83700000	3453000	157440000	3177080	26021.8	739790	66.2443	88	7.50143	12.3173	0.0647344
2019	310000	958900	980400	312322	261390	117370	190750	2848400	1458100	5231000	81792800	75300000	3111000	156000000	2771000	26778.9	866050	59.725	88.1	8.0909	12.4674	0.0647344
2020	310000	914400	1021200	311037	255160	114260	165050	2798200	1380000	4738000	81021100	68900000	3163000	175200000	2644000	28629.6	823410	71.365	89.3	8.32258	12.4735	0.0647344
2021	310000	939600	1027400	311329	264350	117380	161980	2689300	1449400	4557700	84308600	65900000	2949000	37200000	2384000	29360.7	1075150	77.4693	89.3	8.7467	12.5757	0.0647344
2022	310000	955700	1001900	312753	269170	122810	160620	2735300	1492600	3886200	93931600	65600000	3000000	36000000	2000000	29522.5	1317960	68.3699	89.3	9.0453	12.6011	0.0647344
2023	310000	1018600	1053700	313842	273200	127170	161600	2696000	1452500	3991400	96385100	64400000	3000000	36000000	2000000	31196.3	1530240	82.3651	89.46	8.85988	12.6502	0.0647344
2008	320100	1144300	1986700	458795	349930	167390	191540	1940094	1051973	232700	4046700	98960000	2196000	25927200	2984000	28846.8	19650	17.2566	76.95	2.22045	11.0096	0.0813235
2009	320100	1106900	2027700	456206	341880	160900	188340	2236617	1228116	282300	4612700	94302000	2130000	25183200	2612000	30727.3	22980	18.1621	77.16	2.18419	11.115	0.0813235
2010	320100	1106400	2062100	453475	335280	161110	189730	2447531	1394403	322100	5421800	90107000	2204000	26109600	2425000	28990.4	64330	16.0973	77.93	2.1323	11.3038	0.0813235
2011	320100	1120600	2106200	450691	331990	160950	202610	2835016	1624518	440800	6662100	84480000	2309000	27873600	2126000	30950.9	71050	19.3396	79.73	2.3643	11.478	0.0813235
2012	320100	1175000	2155500	448679	328900	163400	196070	3185439	1834683	510100	7696600	82006000	2491000	28120800	1994000	31572.5	79710	17.5341	80.23	2.26723	11.6333	0.0813235
2013	320100	1169500	2180800	444295	324470	161350	189530	3513124	2052345	577300	8509100	80486000	2598000	28167600	1895000	31846.2	114900	19.4823	80.5	2.44361	11.7327	0.0813235
2014	320100	1147200	2210000	436362	320620	157110	216890	3846279	2184996	580300	9212000	77308000	2640000	28550400	1809000	36320.7	116460	23.716	80.92	2.56904	11.8202	0.0813235
2015	320100	1140600	2245500	424065	316880	156210	218810	4152664	2399141	561700	10455700	74480000	2634000	28921200	1698000	31957.5	115390	18.4452	81.4	2.32192	11.9102	0.0813235
2016	320100	1080400	2276100	412169	289250	153050	221690	4511638	2587494	655500	11738400	73949000	2614000	28512000	1660000	32810.9	119310	18.5954	82	2.28904	11.973	0.0813235
2017	320100	1027100	2295400	404609	269370	143100	218940	4706496	2689900	835800	13540900	70660000	2600000	27991200	1590000	39497.4	121060	25.5698	82.29	2.78489	12.0554	0.0813235
2018	320100	1069200	2316200	399837	270060	151380	221600	4508802	2388947	928400	15327200	67124000	2618000	27376800	1488000	37181.5	137420	21.1887	82.5	2.52081	12.1223	0.0813235
2019	320100	965600	2334000	395772	251600	133730	221300	4725028	2407657	875600	16580700	56918000	2430000	25593600	1219000	41534.3	260830	23.5448	83.2	3.1886	12.1941	0.0813235
2020	320100	978300	2352500	393363	251480	134910	222060	4898428	2576352	944400	17546200	53915000	2288000	25160400	1165000	37485.1	354690	22.0252	86.8	2.49627	12.2319	0.0813235
2021	320100	984800	2368300	395989	260020	136590	222010	5040149	2715300	953500	18177300	53146000	2264000	24774000	1147000	40314.2	395340	25.497	86.9	2.71431	12.3142	0.0813235
2022	320100	990300	2400500	401602	262270	138210	136070	5256457	2825677	955900	18286900	52336000	1973000	21907200	1106000	44374.7	472990	28.0314	87.01	3.30567	12.3406	0.0813235
2023	320100	993500	2423700	405638	263840	139040	50130	5307000	2851000	959000	18387000	52047000	1682000	19040400	1065000	41160.4	505390	26.0322	87.2	2.77128	12.3661	0.0813235
2008	320200	799400	1131700	212315	176130	121340	131400	1425543	649326	175723	3389800	74613000	1.01331e+06	3.07866e+07	4099000	29215.5	8970	17.6464	67.51	1.95347	11.4638	0.0813235
2009	320200	805100	1108002	208001	178480	118880	135550	1527018	710161	224891	4056100	69604000	1.02829e+06	3.06221e+07	3585000	27327	11930	15.0594	67.76	2.0988	11.5824	0.0813235
2010	320200	804400	1102053	201559	180900	118730	132230	1710149	832460	282973	4886800	65304000	1.04327e+06	3.04575e+07	3071000	27503.3	17200	16.8567	70.33	2.10598	11.7294	0.0813235
2011	320200	822200	1048983	194099	178450	116950	138880	2020215	988645	372052	5926700	61953000	1.05825e+06	3.0293e+07	2974000	28580.3	19480	17.2758	72.23	2.08667	11.8983	0.0813235
2012	320200	816500	1072052	185508	182850	115120	116780	2241487	1114140	448219	6486100	59738000	1.07323e+06	3.01284e+07	2807000	33569.8	23940	20.1054	72.91	2.57378	11.9891	0.0813235
2013	320200	796400	1009550	175999	178670	112000	94680	2414332	1253227	523573	7114900	57348000	1.06263e+06	3.00342e+07	2667000	31881.9	23010	17.9413	73.7	2.30334	12.0489	0.0813235
2014	320200	772000	1004423	167022	178660	108990	93650	2537609	1370778	417757	7480600	54867000	1.04465e+06	2.91005e+07	2524000	32856.2	21920	18.2602	74.47	2.33934	12.0552	0.0813235
2015	320200	722800	1011646	157344	173130	102000	93920	2555980	1441332	430719	8218600	52901000	984564	2.81555e+07	2460000	37502.8	26300	22.2181	75.4	2.80139	12.0846	0.0813235
2016	320200	591600	992206	149238	160310	94060	96660	2499775	1403030	473449	8673600	51835000	946112	2.71371e+07	2487000	36555.4	48180	20.4332	75.8	2.58791	12.1522	0.0813235
2017	320200	551500	969149	144253	150900	86590	100750	2498976	1447781	429514	9876600	50700000	915559	2.66108e+07	2310000	34184	26160	22.5457	76	2.40342	12.2701	0.0813235
2018	320200	568000	963273	142357	145370	84340	101560	2261900	1246532	381948	10559400	48939000	909466	2.65443e+07	2170000	40188.2	26980	24.8768	76.28	3.08535	12.3465	0.0813235
2019	320200	547500	940173	140469	137900	79510	101780	2015234	1215077	397777	11175200	46555000	871778	2.62922e+07	2052000	39334.9	49650	25.2898	77.1	2.73233	12.37	0.0813235
2020	320200	508600	932440	139046	125720	70370	98860	2098538	1250497	442133	12150300	45047000	818650	2.6063e+07	1960000	42853.2	78530	27.6068	82.79	2.92155	12.4009	0.0813235
2021	320200	550600	893925	139432	135330	80050	152240	2144945	1318465	514972	13577900	44426000	697691	2.5036e+07	1929000	41691.2	88810	26.0755	82.89	2.87362	12.5132	0.0813235
2022	320200	556300	896407	142061	133880	81130	76260	2208333	1360207	504040	13658400	44067000	648324	2.46282e+07	1913000	40979.4	113870	26.7574	81.99	2.76686	12.5643	0.0813235
2023	320200	564100	901961	144142	135710	81870	75770	2233914	1375502	508383	13901900	43864000	614299	2.44e+07	1895000	42566.3	130350	26.6228	83.31	2.93394	12.5964	0.0813235
2008	320300	3893400	5259000	948947	1010110	666840	483922	4206518	2622794	221800	1990500	687356000	4.27599e+06	1.3133e+08	13002250	29125.4	37450	18.6794	47.15	2.04122	9.96176	0.0813235
2009	320300	4276700	5476300	943683	1056600	689280	480080	4574888	2853582	362700	2565300	696985000	4.55251e+06	1.36269e+08	12556000	29006.7	61240	17.1546	49.05	1.9444	10.125	0.0813235
2010	320300	4402000	5637100	939449	1099090	714050	491980	5147301	3235973	437400	3257200	703405000	4.82904e+06	1.41209e+08	12441000	28302.4	81350	17.1812	53.16	2.09991	10.317	0.0813235
2011	320300	4553000	5917000	936435	1110290	727260	507090	6183392	3769600	617700	4542400	697150000	5.10556e+06	1.46149e+08	11864000	31288.3	113660	20.6993	55.43	2.24163	10.5013	0.0813235
2012	320300	4717300	6151500	930291	1124620	730530	512440	7125529	4382468	819100	5300500	671312000	5.38209e+06	1.51089e+08	11273000	29932.5	159830	19.2009	56.71	2.19598	10.6103	0.0813235
2013	320300	4511300	6266800	922278	1126580	729750	517790	8029428	4956600	1012400	5956100	649564000	5.56845e+06	1.57386e+08	10709000	34010.3	198390	21.9911	58.08	2.37051	10.6932	0.0813235
2014	320300	4691800	7570100	913577	1127210	732960	525820	9073282	5672000	1107000	6618400	640757000	5.71403e+06	1.59174e+08	10567000	31298.4	204280	17.5262	59.46	2.18437	10.7893	0.0813235
2015	320300	4709200	6845700	906022	1160620	736270	511470	9769328	6089117	1241800	7524600	621636000	5.66935e+06	1.62126e+08	10169000	36453.4	217720	23.8704	61.05	2.56424	10.8535	0.0813235
2016	320300	4847000	7123300	898756	1154550	737770	521300	10467616	6509500	1176800	7979900	604558000	5.69777e+06	1.63428e+08	9983000	37682.1	254680	22.6763	62.44	2.74143	10.9295	0.0813235
2017	320300	5003000	7334800	892936	1159330	743590	527300	11500108	7143400	894800	8273300	587035000	5.66739e+06	1.64723e+08	9798000	37301.7	281520	22.2885	63.76	2.56909	11.0601	0.0813235
2018	320300	4844800	7368500	887088	1178480	765660	535200	12119600	7608600	970000	8808600	565919000	5.66728e+06	1.65409e+08	8829000	39662.2	324010	25.3012	65.1	2.93563	11.0766	0.0813235
2019	320300	5015400	7492600	880096	1177920	761810	538870	11817228	7033100	1026800	8822100	556618000	5.46204e+06	1.64731e+08	8595000	36640.2	651800	20.6558	66.72	2.84435	11.1365	0.0813235
2020	320300	5019200	7651900	875548	1180380	767900	537860	12483408	7492590	1024300	9581900	541729000	5.15488e+06	1.64114e+08	8341000	42067.5	866580	24.8275	65.63	2.97139	11.1632	0.0813235
2021	320300	5017900	7708900	876440	1181950	767500	546830	12973621	8168000	1048100	10044600	541729000	4.38554e+06	1.57371e+08	8037000	38587.7	1012990	25.4371	73.94	2.59054	11.2699	0.0813235
2022	320300	5024000	7989700	880582	1189880	769280	540080	13612444	8654009	952200	10318200	520857000	4.01872e+06	1.52661e+08	7869000	40509.4	1259980	23.7657	66.8	2.84465	11.314	0.0813235
2023	320300	5050700	8230300	883577	1192510	770070	533330	13648991	8992002	1006700	10569000	515917000	3.7656e+06	1.4957e+08	7701000	39397.6	1461350	25.971	67.6	2.64491	11.365	0.0813235
2008	320400	1133532	1454400	287239	233530	160390	129514	1497700	588944	143500	1866796	72927000	797000	28089600	4442000	26201.2	10570	14.7657	60.96	1.83447	11.025	0.0813235
2009	320400	1141821	1448700	285816	230730	157960	132674	1607746	865248	178400	2187465	69637000	892000	27776400	3962000	28677.4	16310	16.9953	61.16	2.17991	11.1567	0.0813235
2010	320400	1151573	1502200	283587	231020	161480	135834	1740815	950294	210400	2814401	66983000	974000	27913200	3840000	32325.2	20430	18.9065	63.9	2.31541	11.3432	0.0813235
2011	320400	1151896	1552500	279807	226220	159510	138994	1946793	1077873	256600	3618123	65298000	1051000	30196800	3647000	30157.9	24690	19.1931	65.2	2.17562	11.4996	0.0813235
2012	320400	1147972	1585400	275218	226370	155650	142154	2195768	1208173	286100	3912183	63379000	1112000	31438800	3459000	34302.8	33190	19.0698	66.21	2.30679	11.5975	0.0813235
2013	320400	1137169	1591600	268839	224170	150320	135501	2401144	1297348	345800	4179007	62746000	1230000	32671200	3367000	34504.2	48070	19.891	67.45	2.43085	11.6884	0.0813235
2014	320400	1121552	1547500	261188	221690	147560	137309	2568137	1387480	327200	4349289	62414000	1323000	33682800	3317000	31492.6	59350	19.4113	68.7	2.24714	11.798	0.0813235
2015	320400	1083061	1428600	252386	214660	142770	137000	2717635	1472428	411600	4853330	67338000	1343000	32078400	3152000	37267.4	63920	21.2693	70	2.4883	11.8649	0.0813235
2016	320400	937998	1462500	244520	209200	132790	138178	2839740	1524282	495800	5081064	60438000	1379000	32119200	3091000	33757.1	60990	18.6305	71	2.29656	11.9445	0.0813235
2017	320400	813617	1453100	238733	193270	112840	139170	2935831	1588751	445300	5515534	58070000	1387000	31684800	2940000	34118.6	65110	21.8221	71.8	2.34623	12.0704	0.0813235
2018	320400	781549	1437200	235714	181190	109510	139990	2938024	1624942	441900	5948173	55404000	1163000	31852800	2742000	39722.8	65690	22.6229	72.49	2.74379	12.1257	0.0813235
2019	320400	695846	1393800	232101	168540	95670	139806	2658000	1449000	436200	6541861	52974000	1139000	30314400	2476000	39612	121390	26.062	73.27	2.81675	12.1665	0.0813235
2020	320400	690203	1395100	229183	165050	93910	139263	2784506	1506758	370400	7263132	51770000	1106900	30363120	2382500	36608.5	155890	21.2429	77.07	2.70008	12.2157	0.0813235
2021	320400	694783	1387300	229137	172200	95070	125779	2837429	1564171	405900	7718932	54860000	919000	27355200	2317000	44604	170170	24.8379	77.6	3.01776	12.3328	0.0813235
2022	320400	696908	1398300	231875	170020	95850	127374	2960359	1599443	394100	8260315	8.9333e+07	731100	2.43473e+07	2251500	40447.2	210150	26.6647	78.01	3.1066	12.4111	0.0813235
2023	320400	704873	1387800	234059	171760	96600	128236	3055488	1627732	408000	8547676	8.87912e+07	543200	2.13394e+07	2186000	45540.1	235490	25.3592	78.51	3.0811	12.4658	0.0813235
2008	320500	1132200	1637000	296681	272420	162430	206270	1995521	760869	396700	6223700	89065000	1.42787e+06	45838800	5000000	26941.6	15690	16.0122	65.95	1.89707	11.5751	0.0813235
2009	320500	1129400	1631000	292572	270180	160070	204400	2489315	940627	467800	6867800	93635000	1.45521e+06	44784000	4900000	29204	27340	19.0972	66.25	2.1709	11.7136	0.0813235
2010	320500	1144300	1621900	285789	269920	161720	208020	2712943	1052848	621500	8256700	91511000	1.48256e+06	43729200	4500000	30900.7	29440	17.6539	70.03	2.29392	11.8826	0.0813235
2011	320500	1150000	1610500	276940	266190	159650	173190	3098600	1210200	786200	10026300	87640000	1.50991e+06	42674400	4200000	28895.7	31660	16.233	71.31	1.97524	12.0249	0.0813235
2012	320500	1164600	1689800	265715	263070	159660	178990	3377237	1350458	865600	11134700	84531000	1.53726e+06	41619600	4100000	29224.6	48690	19.1375	72.31	2.03433	12.1304	0.0813235
2013	320500	1131200	1649900	254200	257630	154270	184790	3698200	1507800	1004800	12126800	81237000	1.53479e+06	40564800	4000000	34400	61250	19.3198	73.15	2.62863	12.2015	0.0813235
2014	320500	1104600	1632800	243210	253020	151290	184500	3924900	1614500	930100	13048300	78500000	1.52117e+06	39510000	3900000	33442.9	50490	22.0342	73.95	2.47743	12.246	0.0813235
2015	320500	1082200	1635600	230573	250220	147820	159060	4151748	1728527	1004300	15271700	77724000	1.44279e+06	38455200	4000000	34218.1	51660	22.2406	74.9	2.50959	12.2897	0.0813235
2016	320500	976800	1638900	221417	241400	145010	160570	4246700	1788100	893600	16171100	71100000	1.4037e+06	37400400	3700000	34009.2	232370	21.9024	75.5	2.59533	12.3382	0.0813235
2017	320500	922800	1632400	218449	227310	135000	166570	4246900	1811400	1015100	17714700	67800000	1.38647e+06	36345600	3600000	34214.4	52740	21.6813	75.8	2.5764	12.4318	0.0813235
2018	320500	879200	1598700	218964	217790	124470	166570	4100900	1776400	1081000	19527100	64400000	1.39888e+06	35290800	3500000	35489.8	58990	21.6214	76.05	2.55639	12.4843	0.0813235
2019	320500	871800	1456800	218122	208620	118860	166570	3566000	1611000	1114300	21414500	62400000	1.35371e+06	34236000	3300000	38221.1	91410	23.7621	77	2.61522	12.4915	0.0813235
2020	320500	888100	1436100	218271	209650	119580	166570	3570182	1721032	1214500	22635100	60642000	1.28509e+06	33181200	3100000	40063.3	102400	24.474	81.72	2.69266	12.5123	0.0813235
2021	320500	904000	1402700	221587	208010	124040	166570	3464399	1724499	1319600	25837000	60642000	1.10878e+06	32126400	3000000	37931.1	119400	23.8171	81.93	2.79278	12.6053	0.0813235
2022	320500	923900	1390900	226588	210570	128280	166570	3511002	1783001	1358000	25885700	59138000	1.03408e+06	31071600	2900000	41879.5	135670	27.2936	82.12	3.06826	12.6415	0.0813235
2023	320500	951000	1400700	229598	214060	132430	166570	3548000	1817000	1427600	26212800	58563000	978492	30016800	2800000	38727.2	172780	24.317	82.48	2.85139	12.6552	0.0813235
2008	320600	3191200	3056300	780242	851960	535880	348520	3714565	1538939	174300	1962200	268737000	3.566e+06	1.09207e+08	9.46571e+06	26706	36390	16.8183	50.25	2.00243	10.4002	0.0813235
2009	320600	3206200	3171000	772761	852650	531410	357319	4205831	1759439	267500	2374700	266886000	3.74897e+06	1.12069e+08	9.14187e+06	30598.9	64630	20.2148	52.7	2.32103	10.5366	0.0813235
2010	320600	3249400	3056300	764503	854960	528780	366117	4633112	2036551	360000	3167500	245403000	3.93195e+06	1.1493e+08	8.81803e+06	28007.6	71810	17.0045	55.81	2.03201	10.7238	0.0813235
2011	320600	3291200	3349085	754737	850550	525610	374915	5022700	2179300	497200	4194500	237544000	4.11492e+06	1.17791e+08	8.4942e+06	29054.4	96180	16.7095	57.6	2.10119	10.8845	0.0813235
2012	320600	3329700	3506717	742889	846980	522230	383713	5488603	2437045	629000	5352800	237964000	4.2979e+06	1.20653e+08	8.17036e+06	29589.1	112450	19.2531	58.66	2.04733	10.995	0.0813235
2013	320600	3334600	3655286	727456	843530	519670	366654	5947800	2636200	702300	5764100	234936000	4.39217e+06	1.2414e+08	7.86114e+06	31068.7	185910	18.5966	59.9	2.28306	11.0934	0.0813235
2014	320600	3340200	3870201	710051	835550	515560	373281	6313200	2786600	749700	6495800	227400000	4.44106e+06	1.23713e+08	7.6307e+06	36599.3	185250	22.268	61.15	2.5135	11.207	0.0813235
2015	320600	3371500	4015089	688628	835730	516870	373800	6641991	2905983	804800	7489700	224846000	4.30903e+06	1.23225e+08	7.38616e+06	32593.9	187220	21.1644	62.76	2.20156	11.2921	0.0813235
2016	320600	3252000	3982772	668757	824100	518870	377914	6915500	2946100	748300	7492200	222400000	4.23967e+06	1.21605e+08	7.10175e+06	35897.8	190310	21.9684	64.37	2.39911	11.3878	0.0813235
2017	320600	3239600	4106402	655901	811370	515010	382359	7270300	3077000	750200	8100800	218600000	4.16294e+06	1.20996e+08	6.77078e+06	37453.3	195070	24.6162	66.03	2.56281	11.5252	0.0813235
2018	320600	3369000	4139316	652412	784630	535360	387466	7612300	3245500	732200	8771800	211600000	4.16802e+06	1.21651e+08	6.45184e+06	34922.3	183680	22.0152	67.1	2.40708	11.6123	0.0813235
2019	320600	3387800	4173477	649883	787330	534020	391456	7893300	3352900	718300	9726400	206600000	4.0333e+06	1.21641e+08	6.27344e+06	42137.2	311860	24.0293	68.1	3.20927	11.7237	0.0813235
2020	320600	3400900	4245265	648436	786300	535530	394021	8450284	3600526	795700	10806200	203444000	3.81773e+06	1.21544e+08	6.12782e+06	42943.1	358100	26.9093	69.1	3.08041	11.7962	0.0813235
2021	320600	3400900	4271936	648577	787240	536120	356021	8976005	3925202	844500	11222200	2.56397e+08	3.24535e+06	1.16456e+08	5.91279e+06	41166.7	421840	23.1836	71.2	2.80125	11.8957	0.0813235
2022	320600	3409500	4406016	649427	786530	536790	356743	9506315	4155299	834900	11472200	2.502e+08	2.9638e+06	1.12587e+08	5.64974e+06	40875.1	532680	26.4665	71.79	3.12305	11.9339	0.0813235
2023	320600	3427900	4.55776e+06	650009	803770	537260	356126	9748205	4306968	852500	11809300	2.46584e+08	2.77019e+06	1.10032e+08	5.54038e+06	42030.8	607230	23.6702	72.6	2.86005	11.9772	0.0813235
2008	320700	3201200	2107050	613870	570070	472670	270194	2305389	1092056	106900	1064300	327430000	2.75302e+06	8.4651e+07	7.40835e+06	28315.1	39700	16.6823	42	1.9403	9.63972	0.0813235
2009	320700	3345400	2182600	611648	580560	480700	281291	2841647	1331508	219800	1403100	349344000	2.94566e+06	8.82173e+07	7.23086e+06	26960.8	48130	17.3988	43.45	1.79994	9.86171	0.0813235
2010	320700	3393600	2204600	610922	591880	485110	292389	3228001	1613708	279200	2027500	338246000	3.13831e+06	9.17836e+07	7.05337e+06	30315.5	50820	16.8572	51.75	2.168	10.0848	0.0813235
2011	320700	3459900	2.29231e+06	610945	601350	487750	303486	3765300	1807100	356700	2746300	337341000	3.33095e+06	9.53499e+07	6.87589e+06	31238.6	63700	20.0181	53.15	2.33617	10.2371	0.0813235
2012	320700	3613500	2.4167e+06	609051	621570	497620	314584	4262364	2024439	431500	3125500	337730000	3.52359e+06	9.89161e+07	6.6984e+06	29012.1	89840	17.6733	54.35	2.2068	10.3539	0.0813235
2013	320700	3547300	2505282	604928	628820	498680	304897	4742400	2275800	498400	3623800	342300000	3.65238e+06	1.03231e+08	6.53706e+06	31462.2	112380	19.3019	55.72	2.21106	10.4435	0.0813235
2014	320700	3593300	2.56415e+06	600985	631980	501820	315944	5073900	2402100	565500	3759500	345800000	3.7589e+06	1.0471e+08	6.4586e+06	33941.1	122570	19.4878	57.13	2.36729	10.5278	0.0813235
2015	320700	3621500	2.63336e+06	597723	633720	502620	324455	5490300	2608033	586300	4259200	345489000	3.7402e+06	1.06958e+08	6.41112e+06	37058.8	92860	23.5666	58.7	2.5368	10.6146	0.0813235
2016	320700	3608000	2.69844e+06	594546	631900	501530	335977	5894200	2755600	460800	3731200	345700000	3.7692e+06	1.08111e+08	6.31368e+06	37211	96030	21.2431	60.2	2.72453	10.7033	0.0813235
2017	320700	3623500	2.74669e+06	591249	628530	501300	344670	6154100	2876500	428900	3905600	332600000	3.7526e+06	1.0907e+08	6.10338e+06	39634.8	107440	23.7228	61.7	2.86585	10.8105	0.0813235
2018	320700	3640300	2.7988e+06	589310	623950	505770	349989	6366500	3046500	445100	4195700	324300000	3.76488e+06	1.09884e+08	5.82781e+06	35692.5	114870	20.4084	62.6	2.47813	10.8572	0.0813235
2019	320700	3665600	2.84219e+06	586637	626550	505890	353360	6568500	2919100	496600	4660300	320200000	3.64078e+06	1.09803e+08	5.66291e+06	37143.8	230990	23.4597	63.6	2.81246	10.9816	0.0813235
2020	320700	3685200	2.90295e+06	584099	633000	511330	354927	7024842	3081543	523300	5016900	312874000	3.43894e+06	1.09484e+08	5.51983e+06	39659.2	280680	24.8678	61.52	2.91293	11.0256	0.0813235
2021	320700	3688000	2942323	583878	632960	511730	320506	7280344	3242457	549900	5341800	312874000	2.92161e+06	1.04839e+08	5.32297e+06	41665.5	372730	27.254	62.38	3.02044	11.1554	0.0813235
2022	320700	3680000	2.98357e+06	585226	630640	512450	321476	7764555	3367420	498100	5359900	2.25466e+08	2.67081e+06	1.01457e+08	5.09122e+06	40920.1	462850	26.1891	63.08	2.89112	11.2309	0.0813235
2023	320700	3685700	3.03969e+06	586417	631700	513020	321285	7970429	3423556	528000	5747000	2.2246e+08	2.49917e+06	9.92672e+07	4.99835e+06	42540	543710	27.826	64	3.08384	11.3148	0.0813235
2008	320800	4247400	3478100	805431	762130	634150	155290	2809663	1622474	138800	1142900	343191000	2464000	79797600	6893000	29052.8	3650	17.4553	41.4	2.16859	9.74434	0.0813235
2009	320800	4407000	3719100	802966	774270	644540	229800	3146300	1847323	196600	1482700	346954000	2537000	83310600	7072000	28134.8	46260	18.5097	43.1	2.04436	9.95229	0.0813235
2010	320800	4457400	3919900	799816	779530	646340	304310	3494562	2115116	273900	2061500	366575000	2610000	86823600	7251000	29486.2	56970	17.4065	50.81	2.05603	10.1568	0.0813235
2011	320800	4534200	4251100	796105	785740	649920	378820	4117400	2568700	387100	2966800	370967000	2683000	90336600	7430000	28190	81000	17.4308	52.04	1.88922	10.3453	0.0813235
2012	320800	4561100	4603990	791781	793050	653670	395930	4561779	2892770	504200	3398600	380192000	2815000	92106000	7293000	31927.2	94560	19.4647	53.5	2.43713	10.4668	0.0813235
2013	320800	4610200	5183990	785627	799260	657650	413040	4998300	3165400	528500	3850500	387799000	2846000	101014800	7033000	32584.8	121540	21.0241	55.06	2.35825	10.5709	0.0813235
2014	320800	4671900	5685659	779434	796440	658520	410400	5355600	3408700	617200	4316500	400800000	2827000	102918000	7003000	33972.4	101590	20.401	56.46	2.53186	10.6879	0.0813235
2015	320800	4672200	6202107	771890	795680	658240	419300	5737070	3646051	692800	5124700	404674000	2932000	105877200	6973000	37282.7	111670	23.2032	58.15	2.73575	10.7921	0.0813235
2016	320800	4585500	6226002	764100	797170	659990	421220	6027200	3732300	666500	4834700	388500000	2959000	104028000	6680000	33166	132650	20.8987	59.68	2.48885	10.8905	0.0813235
2017	320800	4675600	6292489	753961	794030	660380	423800	6295700	3923900	495900	4523100	374100000	3010000	102850800	6297000	34342	137930	20.8841	61.25	2.34861	10.991	0.0813235
2018	320800	4822600	6349229	746723	804080	681060	428600	6625800	4137000	501500	4867700	342800000	2866000	99624000	5794000	37373	149030	23.5099	62.44	2.84105	11.0697	0.0813235
2019	320800	4892500	6411008	736406	802860	678480	432200	6561900	3997300	554600	5291500	339700000	2722000	97252800	5619000	39377.1	311190	25.997	63.5	2.66419	11.1437	0.0813235
2020	320800	4903600	6501468	730405	809780	682560	411460	7003000	4254000	723600	5682500	331686000	2415000	96236400	5466000	37887	472770	23.7761	65.67	2.8082	11.1872	0.0813235
2021	320800	4917300	6522523	731639	814700	682690	433000	7270400	4527000	586100	6129100	330052000	2109000	94371600	5233000	40311.3	579130	25.1798	66.21	3.02041	11.3143	0.0813235
2022	320800	4929300	6573485	735485	815910	683150	428530	7688187	4760792	776000	6593500	327282000	1895000	92744400	5165000	41340.6	713400	25.6588	66.83	3.1791	11.3628	0.0813235
2023	320800	4948200	6626443	738462	817770	683680	424060	7713880	4867483	1095900	7173500	325657000	1681000	91117200	5097000	41157.4	841160	25.7083	67.7	3.08381	11.414	0.0813235
2008	320900	6030300	4804200	1.39365e+06	1382920	890830	610705	6582488	3071450	206538	1536500	594186000	6.22213e+06	1.91332e+08	1.6747e+07	27488.6	46210	17.2978	44.8	1.93254	9.89099	0.0813235
2009	320900	6229000	4954900	1.39015e+06	1383360	913100	635928	6938016	3274265	303906	2065300	612202000	6.65921e+06	1.99437e+08	1.63482e+07	30022.2	77770	18.1375	46.3	2.0382	10.0689	0.0813235
2010	320900	6516600	5108100	1.38604e+06	1412850	949000	661150	7592115	3561300	388888	2847800	606767000	7.09628e+06	2.07541e+08	1.59494e+07	29981.9	104220	16.9124	51.96	2.16732	10.2606	0.0813235
2011	320900	6617900	5286100	1.38173e+06	1427240	956480	686372	8497000	3750070	511851	4072200	592873000	7.53336e+06	2.15646e+08	1.55507e+07	29999.6	134510	17.8503	54	2.053	10.4273	0.0813235
2012	320900	6727100	5637500	1.37768e+06	1415850	965440	711595	9251956	3998795	665386	4734800	557105000	7.97043e+06	2.2375e+08	1.51519e+07	33421.5	182030	19.882	55.8	2.53912	10.5437	0.0813235
2013	320900	6865100	5963500	1.37174e+06	1415020	972320	691386	9916600	4304287	762465	5574400	540560000	8.28216e+06	2.34087e+08	1.48235e+07	32654.9	239460	20.8331	57.21	2.31984	10.6499	0.0813235
2014	320900	7030700	6351600	1.35994e+06	1424520	978770	714935	10358200	4509292	846112	6032100	528000000	8.50583e+06	2.36944e+08	1.46148e+07	33004.3	252230	21.2584	58.54	2.23183	10.7428	0.0813235
2015	320900	7080600	6674800	1.34817e+06	1427920	981030	731811	10735068	4703071	1029096	7463100	517876000	8.43606e+06	2.41245e+08	1.44603e+07	33639.5	258990	19.7415	60.1	2.36438	10.8371	0.0813235
2016	320900	6873100	6791200	1.33669e+06	1382280	981570	755362	11049300	4809759	972794	7303300	505600000	8.4741e+06	2.4306e+08	1.41947e+07	33851.8	251600	21.0583	61.56	2.4265	10.9163	0.0813235
2017	320900	6858200	6891200	1.32462e+06	1378490	957270	772191	11392300	4993150	855541	7482800	496200000	8.40726e+06	2.44357e+08	1.36739e+07	33873.9	248480	21.7111	62.9	2.58193	11.0273	0.0813235
2018	320900	7043100	7037900	1.3188e+06	1365780	983150	783233	11838900	4775229	1060740	8400800	489100000	8.42534e+06	2.45908e+08	1.30419e+07	39536.4	269680	24.3489	64.03	2.80459	11.1051	0.0813235
2019	320900	7123000	7271500	1.31317e+06	1371140	982850	790987	11281100	4908046	1160227	8775200	486400000	8.14979e+06	2.45792e+08	1.26763e+07	41246.4	143020	24.3993	64.9	2.87453	11.1484	0.0813235
2020	320900	7143100	7408900	1.31269e+06	1389300	991230	797656	12072001	5379028	1169700	9736000	481626000	7.7286e+06	2.46052e+08	1.24051e+07	42404.1	631670	27.4848	54.11	2.85687	11.2019	0.0813235
2021	320900	7147800	7567700	1.31871e+06	1390490	991750	723876	13116082	6208302	1215622	10531700	5.21317e+08	6.59857e+06	2.36784e+08	1.20221e+07	41223.8	777450	22.8496	64.75	3.08452	11.3181	0.0813235
2022	320900	7158100	7836800	1.32536e+06	1398100	992870	728045	14151977	6948924	1294544	10939100	5.10611e+08	6.04855e+06	2.29769e+08	1.15301e+07	37921	1027070	21.1813	65.43	2.81146	11.3945	0.0813235
2023	320900	7188000	7965000	1.32963e+06	1404410	994130	728473	14544000	7297000	2056965	12282300	5.04399e+08	5.66655e+06	2.25076e+08	1.13331e+07	42089	1142720	23.3292	66.27	3.14926	11.4472	0.0813235
2008	321000	2694156	2029900	536654	484750	395330	268494	2306988	986831	132500	2127600	198914000	2.4241e+06	7.44265e+07	6.49052e+06	28659.4	17410	17.2281	51.3	2.13786	10.4405	0.0813235
2009	321000	2823600	2155600	534408	495340	405070	266630	2564228	1147105	174300	2566800	201369000	2.57702e+06	7.71255e+07	6.31066e+06	27279	30450	17.7851	52.9	2.08443	10.6081	0.0813235
2010	321000	2870900	2227100	531636	500130	410330	266780	2858880	1369777	217100	3333600	189721000	2.72995e+06	7.98244e+07	6.1308e+06	29417.3	42280	18.3974	56.75	2.1499	10.7906	0.0813235
2011	321000	3056836	2303200	528760	503550	414730	320747	3303100	1570700	326100	4218900	189467000	2.88287e+06	8.25234e+07	5.95094e+06	30161.1	74740	16.8191	57.9	2.25033	10.9538	0.0813235
2012	321000	3083470	2358200	524735	507440	418990	286280	3690825	1709971	358700	4663300	194523000	3.03579e+06	8.52223e+07	5.77108e+06	34183.5	102650	21.3138	58.81	2.53179	11.0664	0.0813235
2013	321000	3121938	2468100	519079	510270	419800	251812	4039300	1884300	385300	5357100	198844000	3.13405e+06	8.85807e+07	5.60935e+06	31413.2	130770	19.8309	59.98	2.39415	11.1666	0.0813235
2014	321000	3140987	2.52596e+06	513131	510930	422360	258579	4319800	2018100	390000	3677300	199700000	3.20941e+06	8.94034e+07	5.51446e+06	33640.7	131790	21.4398	61.2	2.5952	11.2918	0.0813235
2015	321000	3144091	2.58381e+06	507627	509120	421190	265345	4603034	2134463	425300	4427800	202521000	3.17643e+06	9.08361e+07	5.44476e+06	34393.5	136280	20.2538	62.79	2.5782	11.3749	0.0813235
2016	321000	3002983	2.64167e+06	502551	507160	418850	272112	4779500	2211800	501900	4789700	200300000	3.18598e+06	9.13826e+07	5.33675e+06	34041.7	142030	20.2839	64.4	2.50994	11.4753	0.0813235
2017	321000	2854225	2.69953e+06	496855	482620	391830	273713	4956800	2294000	490700	5076400	192600000	3.1535e+06	9.16565e+07	5.12897e+06	34349	147480	20.5599	66.05	2.57518	11.6092	0.0813235
2018	321000	2873626	2.75739e+06	494365	476540	396090	276687	5140200	2433600	505200	5635700	183500000	3.15832e+06	9.21808e+07	4.88889e+06	36957.3	162130	20.5331	67.13	2.81957	11.6876	0.0813235
2019	321000	2855986	2.81524e+06	493056	471100	386200	276733	5157500	2311000	531300	6119500	179600000	3.06e+06	9.22873e+07	4.75956e+06	38517.8	306590	22.5883	68.2	2.72065	11.7599	0.0813235
2020	321000	2866458	2873100	493068	477840	387950	276779	5419324	2451918	563300	6683000	180290000	2.90299e+06	9.24212e+07	4.65957e+06	41896.8	334990	27.3799	71.03	3.18088	11.7986	0.0813235
2021	321000	2.86975e+06	2950000	495166	480430	388700	276825	5614403	2587892	584800	6848300	1.95751e+08	2.47771e+06	8.89104e+07	4.51421e+06	39561.4	372130	25.3799	71.42	2.97113	11.9059	0.0813235
2022	321000	2.8762e+06	3.01043e+06	497562	482390	389960	276871	5798467	2721009	598300	6991700	1.91692e+08	2.27073e+06	8.62593e+07	4.32858e+06	41527.2	425800	26.9809	72.01	3.03134	11.9741	0.0813235
2023	321000	2.89233e+06	3.06567e+06	498398	488760	391160	276917	5958990	2820433	670600	7112400	1.89069e+08	2.12406e+06	8.43675e+07	4.24811e+06	40391.8	519040	25.9126	72.79	3.03349	12.0153	0.0813235
2008	321100	1124200	1351200	313909	238970	175930	138490	920852	533602	73463	965700	98574000	1398000	21552000	4189000	25830.5	19210	15.1582	59.75	1.86159	10.8665	0.0813235
2009	321100	1178700	1394100	311699	238250	176220	142768	1132211	586295	115328	1213200	77444000	1371000	23775600	3451000	28153	14530	18.3803	59.95	2.12633	11.0342	0.0813235
2010	321100	1195600	1427700	308071	238280	177280	147047	1227187	652398	133003	1590700	69806000	1427000	25820400	3184000	27657.5	21530	16.5532	61.99	1.97608	11.204	0.0813235
2011	321100	1218900	1339100	304630	238730	175040	151325	1532534	800288	182419	2029000	63453000	1597000	26666400	3073000	31825.9	29780	20.4484	63.02	2.45559	11.3505	0.0813235
2012	321100	1256600	1378700	301256	239870	177060	155603	1764913	948608	222586	2352500	58774000	1672000	27152400	2841000	29414.3	37830	19.1786	64.19	1.98896	11.4816	0.0813235
2013	321100	1257900	1512700	296709	238290	176700	149548	1961350	1072773	262136	2862300	57218000	1675000	27386400	2717000	34677.2	50820	21.3336	65.39	2.40659	11.5871	0.0813235
2014	321100	1260200	1524400	291285	235830	175820	153132	2140169	1190590	278470	3118500	54630000	1746000	28674000	2578000	34739.6	51080	19.6179	66.63	2.57758	11.6913	0.0813235
2015	321100	1251500	1413900	285216	236000	175170	154821	2322849	1296010	322328	3487300	53860000	1743000	28950000	2549000	36988	52210	23.5034	67.93	2.82004	11.767	0.0813235
2016	321100	1187400	1457200	279806	233750	174020	158118	2407107	1341284	341689	3629400	53642000	1746000	29095200	2424000	38633.5	53090	24.0783	69.18	2.8437	11.8562	0.0813235
2017	321100	1140000	1477900	276250	222550	165030	161040	2470739	1390869	330714	3866400	51138000	1676000	27256800	2264000	37672.3	50270	21.3538	70.5	2.69386	11.9049	0.0813235
2018	321100	1073000	1495000	274168	200940	153300	162828	2439097	1356407	372205	4084100	49449000	1668000	24628800	2159000	40894.3	59280	23.8476	71.24	2.89097	11.9147	0.0813235
2019	321100	954300	1529400	272586	183840	132950	164191	2422634	1323462	396392	4662500	47014000	1619000	23769600	2063000	38841.3	106460	23.6078	72.18	2.6044	11.9372	0.0813235
2020	321100	956000	1528900	271898	180970	132350	165219	2571003	1449924	346318	4989000	46697000	1177000	23456400	2020000	40816.3	119340	25.7547	79.45	2.73175	11.9632	0.0813235
2021	321100	960200	1519900	272633	184580	134520	149656	2707020	1557929	366465	5429500	45925000	898000	17314800	1993000	43593.8	129080	28.2124	79.88	3.04394	12.088	0.0813235
2022	321100	963000	1480900	274338	184700	135700	150699	2840614	1629428	337341	5355300	45893000	759000	17116800	1973000	41884.2	134470	24.6549	80.24	3.07587	12.1437	0.0813235
2023	321100	978700	1462500	275209	187950	137010	150781	2905772	1681152	410824	5339500	45107000	731000	17052000	1953000	44508.7	147530	28.8045	80.7	3.10782	12.1937	0.0813235
2008	321200	3006200	2184200	501788	553010	418850	291764	2032250	996235	144500	1254400	199975000	1491000	59582400	7227000	25811.8	26080	16.3799	49.1	1.94196	10.2342	0.0813235
2009	321200	3102200	2209600	497623	562520	428950	281546	2233592	1171319	211700	1729300	195273000	1719000	58137600	7143000	29791.9	51430	19.0843	51	2.04263	10.4029	0.0813235
2010	321200	3144000	2182100	491070	571970	433180	287601	2477604	1340727	258600	2157300	193251000	1827000	59056800	7255000	28780.9	68160	18.9608	55.65	1.95962	10.6114	0.0813235
2011	321200	3212600	2281415	482686	577020	435790	293399	2942800	1542500	306200	2620200	185555000	1834000	59050800	6476000	31595.3	81660	19.8032	56.81	2.32867	10.7742	0.0813235
2012	321200	3237700	2475205	474683	580530	438920	286044	3221109	1711159	394600	3009000	179192000	1869000	61965600	6232000	33842.1	91220	19.81	57.92	2.46265	10.8846	0.0813235
2013	321200	3266800	2542464	467160	582320	438520	278689	3445900	1877200	464100	3422000	175560000	1943000	63619200	5624000	30811	113380	20.3045	59.04	2.15445	10.9889	0.0813235
2014	321200	3285300	2602347	459762	581980	438660	276514	3619400	2010600	508100	3675500	171400000	1969000	65109600	5523000	34486.2	135420	20.0921	60.15	2.37951	11.1018	0.0813235
2015	321200	3293500	2682913	452777	581030	437450	276847	3795344	2094267	562300	4323000	165516000	1954000	64070400	5342000	34863.2	154880	21.4967	61.55	2.58292	11.193	0.0813235
2016	321200	3130300	2755208	447684	575180	435050	275273	4159600	2288500	567400	4489300	161200000	1935000	66259200	5253000	37622.6	16950	20.9603	63.2	2.68478	11.299	0.0813235
2017	321200	3066800	2.79385e+06	442034	566160	416480	275667	4572300	2516000	479100	4754900	157600000	1899000	68014800	4869000	38289.1	163250	23.0696	64.93	2.77124	11.4505	0.0813235
2018	321200	2871100	2840211	437689	530220	385990	276680	4843600	2699000	530200	5323600	153000000	1889000	69720000	4698000	36314.1	169250	20.2099	66	2.51646	11.5282	0.0813235
2019	321200	2805200	2869140	432072	518470	374130	275232	4814800	2661400	535900	5942400	148100000	1871000	69991200	4445000	41641.7	304110	24.582	66.8	2.86955	11.5372	0.0813235
2020	321200	2807900	2932809	430117	518570	374750	276067	5063744	2809445	554900	6275400	145942000	1821000	68754000	4353000	39067.2	356490	22.196	68.1	2.75517	11.5797	0.0813235
2021	321200	2810000	2934646	431471	518520	375670	276200	5263090	2961969	573700	6679000	144882000	886000	52995600	4302000	41509.5	434020	25.8379	68.64	3.06261	11.7135	0.0813235
2022	321200	2813200	2956715	434382	520030	377010	266808	5587471	3149577	589100	7038600	143911000	837000	49945200	4270000	41312.4	428950	26.6499	69.24	3.05589	11.7844	0.0813235
2023	321200	2830900	3013715	435659	524960	377760	257416	5740340	3245018	602100	6974200	142959000	788000	44368800	4225000	42380.8	506910	26.3802	70.08	3.12689	11.8424	0.0813235
2008	321300	3524600	4922800	700438	689440	567970	312837	2533816	1431093	150800	986200	353655000	3.19607e+06	9.80207e+07	8.52577e+06	26740	29420	15.6562	35.85	1.88338	9.41359	0.0813235
2009	321300	3589900	5231233	697720	698940	562880	322519	2875367	1692865	225100	1300600	366389000	3.38151e+06	1.01152e+08	8.26579e+06	30161.3	35830	19.7809	37.7	2.05103	9.63529	0.0813235
2010	321300	3655500	5455173	693693	703960	570680	332202	3259135	1925063	263400	1683600	383976000	3.56695e+06	1.04283e+08	8.00582e+06	28093.8	46390	16.1031	48.33	2.16864	9.87708	0.0813235
2011	321300	3685400	5751810	688243	706750	569430	341884	3790900	2231700	367900	2212400	398419000	3.75239e+06	1.07414e+08	7.74584e+06	29817.5	67630	19.7126	49.78	2.26346	10.0772	0.0813235
2012	321300	3887500	4788322	680652	707100	571860	351567	4159759	2497463	476700	2724000	402904000	3.93783e+06	1.10545e+08	7.48586e+06	34709.6	133000	22.0241	50.97	2.55129	10.2097	0.0813235
2013	321300	3759900	4993586	671818	705800	572710	338611	4451000	2613700	630000	3111600	399638000	4.05624e+06	1.14645e+08	7.25989e+06	31775.6	172730	19.0744	52.36	2.09902	10.3031	0.0813235
2014	321300	3891500	5331252	664567	709840	576790	349370	4631600	2729400	706700	3455900	394500000	4.15658e+06	1.15788e+08	7.14189e+06	35334	187040	20.6188	53.74	2.42182	10.4117	0.0813235
2015	321300	3866300	5668918	659019	712000	577300	357727	4852632	2859993	873600	4057800	391040000	4.12375e+06	1.17927e+08	7.06857e+06	33393.7	182850	19.915	55.53	2.2168	10.4986	0.0813235
2016	321300	3845400	5777721	653860	718030	579410	369496	5172400	2985100	839500	4245700	385900000	4.14522e+06	1.18896e+08	6.94355e+06	34903.7	164540	22.1663	57.53	2.3243	10.5895	0.0813235
2017	321300	3847600	5945369	648007	715500	575560	377757	5363000	3158300	656600	4241200	381400000	4.11284e+06	1.1954e+08	6.68929e+06	35378.5	159180	23.3544	58.53	2.38018	10.696	0.0813235
2018	321300	4010200	6051821	640539	741480	598760	380414	5593700	3346500	706700	4335400	365800000	4.09217e+06	1.19437e+08	6.33443e+06	40765.9	167830	23.2744	60	2.95458	10.7481	0.0813235
2019	321300	4081700	6250246	631369	739000	597380	380304	5552500	3170200	865400	5057400	359000000	3.91839e+06	1.18176e+08	6.09472e+06	36371.7	291020	22.7835	61.1	2.62809	10.8657	0.0813235
2020	321300	4094600	6463123	626455	746310	603260	380665	5883396	3361800	967600	5894400	351832000	3.68832e+06	1.17424e+08	5.9201e+06	41834.6	349940	23.1563	62.24	3.03832	10.9178	0.0813235
2021	321300	4096100	6401609	625836	747900	603150	343538	6109229	3614279	750600	5844800	2.47407e+08	3.13156e+06	1.12373e+08	5.70547e+06	42944.5	442690	24.4782	63.24	2.90685	11.0497	0.0813235
2022	321300	4105900	6482475	627350	749220	603750	344616	6496440	3899881	760000	6218100	2.41695e+08	2.86304e+06	1.0876e+08	5.45768e+06	44914.6	510160	27.4175	64.07	3.394	11.1553	0.0813235
2023	321300	4129700	6499497	628540	752670	604930	344364	6738929	4049157	745800	6418400	2.38439e+08	2.67869e+06	1.06398e+08	5.35738e+06	43845.8	617740	24.992	65	2.96786	11.226	0.0813235
2008	330100	1101600	3081000	218630	403590	192420	162380	2737600	1408100	209068	4196700	119295000	2.33279e+06	30346800	9132000	29101.1	17770	17.5052	69.34	1.95016	11.1642	0.36823
2009	330100	1072400	3235300	214920	396310	188990	162630	2897400	1497400	254489	4904000	118918000	2.50356e+06	32803200	8816000	30788.6	37690	17.606	69.5	2.05045	11.2178	0.36823
2010	330100	580000	3220000	210613	381830	174650	162990	3163400	1698800	319655	6165800	115140000	2.67433e+06	33087600	8737000	31561	40690	17.7102	73.3	2.31266	11.3659	0.36823
2011	330100	978100	3372200	206547	373420	167820	180830	3570700	1907900	392344	7475000	109714000	2.84509e+06	35157600	8308000	33726.7	50690	19.9041	73.9	2.4471	11.5218	0.36823
2012	330100	549800	3434000	199307	370120	165440	167090	3843400	2077200	448764	7862800	108363000	3.01586e+06	35238000	7950000	30710.7	88840	19.9776	74.3	2.10484	11.6207	0.36823
2013	330100	475300	3484200	190009	365680	163920	153350	3993700	2161100	506246	8557400	103300000	3.01931e+06	32565600	7761000	30587.3	123660	17.1409	74.9	2.20254	11.6791	0.36823
2014	330100	475300	3421900	180707	294960	107260	155510	4185800	2333800	562286	9611800	97928000	2.951e+06	31912800	7170000	34008.4	137220	20.9921	75.1	2.41691	11.7646	0.36823
2015	330100	459100	2994700	171388	297690	84530	154940	4404100	2524100	880440	12054800	97222000	2.92609e+06	30907200	6904000	34840.6	177760	20.7961	75.3	2.53314	11.8415	0.36823
2016	330100	459100	2837200	164342	300590	84970	156560	4490100	2621500	914373	14043100	94408000	2.89202e+06	31398000	6776000	36084.7	180380	20.8146	76.2	2.60493	11.9429	0.36823
2017	330100	472600	2557700	160804	273230	86480	157060	4577000	2738800	896205	15409200	92236000	2.86133e+06	30972000	6632000	35541.4	236450	22.482	76.8	2.43969	12.0267	0.36823
2018	330100	496000	2361600	160438	278140	88500	157010	4661000	2827100	942335	17170800	87108000	2.82868e+06	30320400	6316000	38449.4	280850	21.7514	77.4	2.80232	12.0699	0.36823
2019	330100	496400	2149100	160165	282240	88730	157020	5011500	2953400	1053876	19528500	83773000	2.71821e+06	29725200	5924000	40148.2	290730	23.8144	78.5	3.09009	12.1724	0.36823
2020	330100	508600	1958800	161529	248160	90840	157100	5006500	2960500	1029656	20696600	80640000	2.43509e+06	27438000	5459000	36425.4	316960	23.9716	83.3	2.80169	12.1941	0.36823
2021	330100	530000	1905000	163093	246270	91380	157010	5015300	3142900	987866	23920400	79755000	1.96938e+06	15896268	5147870	37130.3	378080	21.752	83.6	2.52152	12.2871	0.36823
2022	330100	530100	1887500	167473	247920	93040	121250	5157500	3210400	969527	25420900	78129000	1.8769e+06	14919600	4703000	43458	386190	27.7555	84	2.91428	12.3077	0.36823
2023	330100	551900	1956000	171133	252270	93260	121680	5331200	3355900	1201439	26362300	76210000	1.88353e+06	15024000	4445000	37909.6	421810	22.2085	84.2	2.57444	12.3632	0.36823
2008	330200	784300	3062100	225788	310620	135980	186590	2612300	1184400	305500	4394083	112969000	3200000	362320800	6799000	26356.8	11780	14.5788	63.59	1.82824	11.1531	0.36823
2009	330200	778600	3228500	224767	302770	131830	188070	2847400	1331500	355300	5060788	113349000	3578000	367449600	6733000	27432.5	33510	17.9014	63.7	1.93223	11.2361	0.36823
2010	330200	871300	3261100	221747	292840	128750	189050	3362000	1650600	430100	6007447	108879000	3956000	394524000	7425000	31442.7	45730	19.4589	68.3	2.32247	11.4068	0.36823
2011	330200	785000	3354700	218008	285450	125790	208810	3928600	1881400	579400	7507233	111290000	4223000	412414800	7783000	30165.5	61330	18.8311	69	2.04312	11.5629	0.36823
2012	330200	711000	3439800	213876	274800	117920	191450	4134900	1967900	722000	8284400	111774000	5007000	412826400	7492000	30074.8	130400	18.9233	69.4	2.32294	11.6434	0.36823
2013	330200	607900	3237000	209304	266410	111300	174090	4210500	1971200	803800	9398939	112886000	4772000	407996400	7614000	33691.3	130400	22.2334	69.8	2.24624	11.7189	0.36823
2014	330200	637600	2985700	202480	269260	114410	175570	4236600	2034200	819600	10008563	111447000	4352000	402194400	7340000	33788.4	158210	22.1935	70.3	2.41472	11.778	0.36823
2015	330200	790500	3032100	193591	259980	110920	175700	4371500	2082100	1096000	12526362	108377000	4789000	410084400	7153000	32117.2	149050	19.6595	71.1	2.1468	11.8237	0.36823
2016	330200	615000	3018600	186206	254760	106110	178140	4633100	2193700	1042700	12892601	106184000	4656000	401784000	6208000	36140	180210	21.7472	71.9	2.79475	11.898	0.36823
2017	330200	637000	2691000	181546	261480	109740	179370	4645100	2268300	917200	14106049	99942000	4431000	393426000	5713000	34729	195320	20.1742	72.4	2.50352	12.0128	0.36823
2018	330200	665900	2555800	179069	258370	109400	177320	4738100	2291400	918800	15941000	90093000	4462000	384639600	5430000	36742.1	156700	20.7823	72.9	2.74572	12.0907	0.36823
2019	330200	663300	2471800	177569	259310	109870	175180	5070500	2401600	938500	17678895	88005000	4521000	366532800	4755000	37574	241720	21.8676	73.6	2.82822	12.1916	0.36823
2020	330200	674400	2454800	177764	237830	111290	175530	5340800	2457200	879800	17420878	85468000	4151000	358159200	4569000	42632.1	308680	25.3315	78	3.12247	12.2182	0.36823
2021	330200	677900	2313700	179804	238180	112820	175530	5545800	2610200	956000	19444158	84456000	3781000	373098180	4271040	42590	355520	24.5259	78.4	3.17607	12.3723	0.36823
2022	330200	716000	2360800	183327	239780	114960	141180	5898200	2755800	1089400	21878133	84109000	3411000	359707200	3994000	39676.6	416230	26.2954	78.9	2.77957	12.4407	0.36823
2023	330200	750300	2381500	185897	241120	115060	141210	4019000	2869200	1205900	22350944	83148000	3041000	356818800	3830000	43483.9	481310	25.0407	79.9	3.24273	12.4824	0.36823
2008	330300	671085	2159000	138221	244970	157710	128590	1244551	509198	179865	2096670	84477000	1.36908e+06	347730000	4111000	27487.1	18140	15.3618	60.52	1.91667	10.3547	0.36823
2009	330300	723600	2201400	135360	256000	163570	127100	1326604	557585	215822	2515604	87332000	1.49303e+06	340172400	4152000	29097.8	13410	17.1813	60.7	1.98435	10.3871	0.36823
2010	330300	665863	2246100	130991	256290	163070	125240	1541232	646001	291432	3110478	89359000	1.61698e+06	347505600	4155000	32226.9	10420	19.4138	66	2.14022	10.5234	0.36823
2011	330300	695588	2302500	126387	249270	158300	140540	1764881	731239	395339	3704471	86978000	1.74093e+06	348586800	4017000	29683	12500	17.1835	66.3	2.21437	10.6647	0.36823
2012	330300	645864	2331400	123243	247080	156600	126950	1851148	795884	421797	3877865	86419000	1.86488e+06	350434800	3975000	30995.9	33940	17.7909	66.7	2.29071	10.7332	0.36823
2013	330300	549444	2227300	122677	245650	155640	113360	1878739	808828	540891	4379565	86800000	1.94937e+06	349084800	3987000	31484.9	48190	19.4663	67	2.11579	10.8118	0.36823
2014	330300	648604	2191700	121234	218760	123970	113810	1922286	866364	518925	4889810	82623000	1.97978e+06	350386800	4035000	31414.4	56720	17.357	67.2	2.41649	10.8758	0.36823
2015	330300	631058	2147900	117851	215820	107570	114190	2074811	947188	697509	5694294	81332000	2.01206e+06	348561600	3941000	35778	66120	21.3411	68	2.44815	10.9495	0.36823
2016	330300	609861	2120100	114871	200600	104920	115170	2106499	971192	681217	6667495	80377000	2.02146e+06	344907600	3876000	37316	47200	23.3419	69	2.72527	11.0408	0.36823
2017	330300	638802	1882600	113274	208410	107410	115510	2198826	1025256	729148	7616108	79186000	2.0156e+06	334765200	3789000	37191.4	58450	22.1078	69.7	2.68506	11.0913	0.36823
2018	330300	649520	1866900	114103	211500	107090	115860	2237343	1042840	701208	8741367	77518000	2.01175e+06	327586800	3632000	36572.5	67450	22.0314	70	2.48564	11.1907	0.36823
2019	330300	636752	1881800	115115	216330	108000	115230	2396103	1104126	695709	10841222	73506000	1.95365e+06	316722000	3476000	38527.3	76520	22.191	70.5	2.60837	11.2822	0.36823
2020	330300	656360	1813500	116402	215480	108640	115470	2540633	1132230	837920	10271684	71256000	1.75478e+06	300474000	3239000	36475.4	105510	21.8058	72.16	2.44065	11.321	0.36823
2021	330300	684548	1818300	116394	217210	111510	117620	2606522	1183307	823450	10668151	70270000	1.40548e+06	256296876	3077500	43085.3	142450	26.179	72.8	3.06895	11.4192	0.36823
2022	330300	689902	1851900	117822	220890	113250	145890	2775047	1245540	843599	11377360	69383000	1.32046e+06	247791600	3008000	43664.5	177480	26.1304	73.65	2.99355	11.4774	0.36823
2023	330300	698902	1888000	119521	225500	113690	145950	2928562	1282784	964372	11759428	68131000	1.31548e+06	245563200	2927000	43989.7	227640	26.7284	74.7	3.13336	11.5583	0.36823
2008	330400	1280700	1568600	356411	316610	177960	197640	1744883	782696	103491	1359199	105704000	3.74868e+06	16838400	6713000	25727.7	29490	14.6899	50.02	1.74793	10.8911	0.36823
2009	330400	1256700	1596300	351024	308290	177830	198430	1736293	806578	123647	1611146	105991000	4.04244e+06	17031600	6705000	28361.8	32670	17.4243	51.2	1.94178	10.9416	0.36823
2010	330400	1196300	1580300	344436	298430	169990	198790	1995387	951334	153429	1990633	105157000	4.3362e+06	17228400	6641000	31290.8	32590	19.5866	53.3	2.26087	11.1175	0.36823
2011	330400	1177600	1560500	336124	287650	164850	216890	2230146	1005689	188602	2406148	104725000	4.62997e+06	17407200	6608000	29536.5	42990	18.9111	54.4	2.24657	11.2648	0.36823
2012	330400	1125100	1529500	325390	281940	164420	198760	2289656	1104603	229975	2607000	104862000	4.92373e+06	17823600	6668000	30094.7	69390	17.3835	55.3	2.06539	11.3375	0.36823
2013	330400	1060500	1523200	313088	274280	159790	180630	2271581	1107614	331742	3033633	104587000	4.97508e+06	18208800	6744000	33169.2	67670	19.1934	57.1	2.23322	11.4186	0.36823
2014	330400	948400	1478700	301218	259190	148880	182500	2184366	1116529	318522	3349028	104060000	4.91898e+06	18254400	6520000	35266	73580	21.8656	59.2	2.40935	11.4753	0.36823
2015	330400	943400	1429300	287502	266490	151150	183470	2062230	1151994	541536	4241331	101789000	4.90848e+06	18080400	6283000	35598	95260	23.5945	60.9	2.45906	11.5195	0.36823
2016	330400	882200	1339900	275118	253030	141290	183870	2000535	1204207	499094	4421926	100457000	4.84141e+06	17857200	6124000	38939.7	78760	22.0773	62.9	2.74295	11.6057	0.36823
2017	330400	927600	1242900	266506	258360	148370	183910	1953261	1233607	493599	4947026	99650000	4.74219e+06	18015600	5977000	34761.8	80020	19.393	64.5	2.36251	11.7203	0.36823
2018	330400	934300	1180800	263493	251610	150740	177600	1954857	1232715	487088	5888689	98015000	4.64564e+06	16208400	5891000	36622.1	95850	21.4345	66	2.71016	11.8155	0.36823
2019	330400	956800	1173100	260997	248700	147890	167380	2017087	1219608	533851	7668853	87550000	4.42946e+06	16250400	4568000	39172.2	104200	22.7401	67.4	2.75089	11.9018	0.36823
2020	330400	975200	1166700	260099	253310	150540	167380	2114551	1214307	536786	7121830	81869000	3.92105e+06	15991200	4343000	38805.9	128860	23.2632	71.34	2.9889	11.9166	0.36823
2021	330400	977900	1118700	260873	252480	150910	167380	2217326	1268390	589013	7937224	80363000	3.15009e+06	25063800	4132340	40208.7	153400	23.4782	71.9	2.74565	12.0484	0.36823
2022	330400	981900	1075000	262641	253990	154290	139900	2359062	1367956	609123	8277051	77871000	2.94346e+06	21135600	4004000	39976.8	189140	24.363	72.35	2.8744	12.0991	0.36823
2023	330400	1002800	1097400	263770	242070	154690	141340	2439817	1381025	569420	8269900	74312000	2.90311e+06	21571200	3736000	41052.6	215290	23.971	73.2	2.80327	12.1379	0.36823
2008	330500	926800	1501700	234013	235990	138360	132470	1444510	633944	74260	864170	56344000	1.91913e+06	32744400	7920000	30251.3	12790	16.8243	50.01	2.23559	10.5975	0.36823
2009	330500	914200	1618600	228133	231520	135000	134200	1530907	676188	99930	1085102	57076000	1.87412e+06	33170400	8023000	29522	15990	16.8603	50.7	2.09233	10.6576	0.36823
2010	330500	902000	1630700	222906	212180	134570	134460	1763232	817961	113295	1271209	55081000	1.82911e+06	32632800	7753000	29169.9	15390	18.5037	52.9	2.06396	10.8212	0.36823
2011	330500	902900	1650200	215885	224970	134010	136820	1985207	894007	133686	1517340	54713000	1.7841e+06	33361200	7487000	28983.2	19340	18.954	53.3	2.21915	10.9719	0.36823
2012	330500	899400	1680300	204578	224250	136140	136370	2084828	936259	150337	1675076	52625000	1739090	34322400	7187000	33958.6	39810	20.2796	55.1	2.62651	11.0615	0.36823
2013	330500	905500	1652400	190889	223070	136090	135920	2129835	950085	219648	1976149	52722000	1694080	33786000	6869000	32789.4	38060	21.384	56	2.21361	11.1374	0.36823
2014	330500	737500	1684700	180002	187120	106420	136870	2114043	960387	268026	2245670	47423000	1.64907e+06	32780400	5730000	31834.6	47930	19.3777	57.4	2.15904	11.2138	0.36823
2015	330500	521700	1681600	169392	151680	80000	136530	2134428	971134	413417	2737406	45291000	1604060	32060400	5310000	37172.6	52240	21.3673	59.2	2.80061	11.2777	0.36823
2016	330500	481500	1682600	160868	143980	73880	137230	2144769	948404	402551	2886169	42928000	1559050	32666400	4225000	33534	56900	20.368	60.5	2.34578	11.3645	0.36823
2017	330500	485000	1514500	156241	142880	75080	133580	2138636	978978	366819	3250181	40935000	1.51404e+06	32548800	3760000	37083	52590	21.2697	62	2.82691	11.4413	0.36823
2018	330500	518200	1511800	155576	133060	78550	134460	2164215	989939	406697	3975433	38914000	1469030	31692000	3271000	39682.2	69580	25.2078	63.5	2.90833	11.5311	0.36823
2019	330500	519000	1418300	155507	135160	78610	128690	2266278	1026845	412517	4668656	37279000	1.42402e+06	31134000	2822000	38910.3	82640	21.671	64.5	2.98948	11.6656	0.36823
2020	330500	525100	1430500	156926	137050	79110	135000	2389393	1055439	414173	4844230	37257000	1.37901e+06	28821600	2649000	39695.9	106730	25.5694	65.64	2.7772	11.6887	0.36823
2021	330500	527400	1439100	160095	137770	80340	135000	2528370	1094241	451030	5244939	36648000	1334000	22402236	2450760	42809.1	129980	23.7189	66	2.94555	11.8167	0.36823
2022	330500	529800	1384500	166483	138030	81070	83790	2.66602e+06	1.12301e+06	502961	6019198	36343000	1288990	21217200	2329000	45219.6	161130	25.2439	66.36	3.05548	11.8715	0.36823
2023	330500	536600	1389700	170042	140140	81340	83990	2.78733e+06	1175069	533437	6069736	36335000	1243980	20642400	2220000	43707.6	205610	24.2167	67.5	3.00738	11.9125	0.36823
2008	330600	822433	2167800	158463	321470	177270	153740	1781427	1086254	127600	1440939	101916000	1848000	15622800	6484000	30277.6	12550	18.733	57.46	2.11549	10.8369	0.36823
2009	330600	858122	2331805	155138	326940	183840	160000	1900613	1181223	161177	1695366	103021000	1944000	16179600	6407000	27236.4	15540	16.4715	57.7	1.8985	10.9018	0.36823
2010	330600	823086	2452586	151100	329790	184810	160560	2258049	1436307	206999	2219473	103480000	2040000	16982400	6226000	28889.8	16700	18.1665	58.6	1.95264	11.0617	0.36823
2011	330600	825905	2413744	146746	332510	185970	167610	2601659	1617599	246577	2533091	104487000	2151000	17594400	6166000	29798	28630	17.9807	59.3	2.27316	11.2349	0.36823
2012	330600	786429	2421722	141059	331130	187750	160300	2787681	1754108	281912	2787074	105268000	2314000	18354000	6143000	29049.8	39370	16.3009	60.1	2.22785	11.3253	0.36823
2013	330600	776488	2347374	134855	330710	188760	152990	2912077	1832284	332004	3121077	104836000	2428000	18477600	6044000	30095.3	51560	17.5546	61	2.10559	11.4055	0.36823
2014	330600	791001	2309154	129261	268810	148360	155770	2969532	1924238	371754	3464437	112811000	2654000	18334800	6277000	36830.1	53100	20.3228	62.1	2.5312	11.4752	0.36823
2015	330600	751001	2328436	125636	268670	124130	155960	3032473	1980509	534419	4214117	109144000	2842000	17000400	6052000	34095	54880	21.993	63.2	2.46986	11.5208	0.36823
2016	330600	734708	2334424	124421	275440	119290	165350	2943018	1945744	574292	4560959	107471000	2790000	15925200	5850000	34357.4	61800	22.6122	64.3	2.49876	11.5863	0.36823
2017	330600	751198	2128840	124450	235950	122600	167090	2946200	1994848	496487	4698303	105526000	2914000	15862800	5771000	37629.9	64960	21.7376	65.5	2.80348	11.6428	0.36823
2018	330600	775810	2041734	125152	229390	119710	167280	2950972	2006715	521662	5566451	88645000	2594000	15505200	5668000	40883.2	71300	26.6167	66.6	2.88972	11.7051	0.36823
2019	330600	782799	1910412	126299	233430	120870	154910	3138524	2084570	457441	6408697	75176000	2578000	16050000	4824000	35931.8	79760	21.0207	68.4	2.64484	11.7679	0.36823
2020	330600	789902	1734219	128689	217690	121940	154910	3313897	2139430	465430	6671630	73828000	2562000	16326000	4674000	36369.6	78910	21.6693	71.02	2.73362	11.8063	0.36823
2021	330600	792913	1720328	132880	218660	123090	154920	3397943	2315513	480833	7144995	73043000	2546000	16540032	4401530	38026.2	90900	22.823	71.5	2.53182	11.9317	0.36823
2022	330600	717112	1708631	140436	215050	119860	115470	3562980	2374597	478304	8048576	71843000	2530000	16492800	4320000	43827.4	117860	25.3696	72.1	3.02392	12.0126	0.36823
2023	330600	753164	1740400	146447	217080	120360	116350	3646202	2477302	531194	7786417	70603000	2514000	16100400	4227000	38824.3	137780	23.3021	73.1	2.58496	12.072	0.36823
2008	330700	876600	2330100	264275	261160	154420	158330	1387000	746400	134303	1375772	107947000	2213000	33938400	8183000	27767.7	14350	16.5803	58.25	1.97085	10.5037	0.36823
2009	330700	901900	2400500	261239	272830	159380	158810	1462000	819000	168184	1653599	110412000	2896000	34437600	8627000	26725.1	17880	16.9848	58.4	1.87201	10.5533	0.36823
2010	330700	894200	2464500	259051	273660	158100	159510	1712400	994500	220357	2115178	111955000	2688000	36042000	9022000	31220.8	17860	20.5632	59	2.31151	10.7192	0.36823
2011	330700	890900	2531800	257594	274170	154930	162030	1991000	1132500	238326	2350800	115265000	2703000	38359200	8232000	28832	22380	17.3476	60	2.01854	10.8667	0.36823
2012	330700	897800	2583100	252886	274820	154840	160020	2129600	1211300	279030	2719500	119634000	2845000	39829200	8408000	34479.9	42930	21.4271	61.4	2.29507	10.9613	0.36823
2013	330700	883000	2626500	246532	272130	153420	158010	2213700	1260200	341642	3222488	124065000	3210000	41796000	8355000	30300.2	54470	16.8893	62.2	2.28569	11.0429	0.36823
2014	330700	607100	2614100	240191	226320	99610	161160	2230000	1340100	354790	3528648	111410000	3209000	41481600	7510000	33976.9	66000	19.827	63.3	2.50653	11.1203	0.36823
2015	330700	482600	2606100	233945	220620	83570	167280	2261200	1396600	547649	4643797	109137000	2974000	33688800	7299000	32612.9	69750	20.4815	64.5	2.29175	11.1728	0.36823
2016	330700	460500	2577300	228823	223560	80670	168030	2367000	1476000	574201	5423599	100372000	3014000	30817200	5219000	36229.1	66970	22.9119	65.7	2.44701	11.2465	0.36823
2017	330700	464200	2303100	224876	200700	81860	169580	2153400	1445600	473087	5366856	94425000	2803000	31005600	4690000	37465.6	69710	21.8765	66.7	2.54974	11.2796	0.36823
2018	330700	454900	2318200	222959	201700	77710	170750	2161200	1488900	520599	5739988	91774000	2897000	30123600	4481000	39264.3	75100	22.7722	67.7	2.75712	11.3368	0.36823
2019	330700	435000	2075000	222827	202660	77510	170000	2367700	1539600	523033	6643295	83436000	2897000	27793200	4198000	36778.2	95740	22.4638	68.7	2.77821	11.4369	0.36823
2020	330700	452000	1882900	226048	177150	78150	169000	2530100	1556900	542854	7034142	78473000	2921000	25982400	4005000	39708.2	126530	22.2963	68.19	2.93592	11.465	0.36823
2021	330700	458200	1842800	229931	175970	81090	170000	2488300	1645500	675908	7914107	75054000	2810000	24006240	3741760	40126.1	127920	25.4786	68.7	3.08396	11.5916	0.36823
2022	330700	480100	1850500	235358	180650	85640	150700	2592400	1712100	639551	8303964	72424000	2763000	23997600	3464000	38372.8	164210	24.1294	69.4	2.81476	11.6255	0.36823
2023	330700	484900	1842800	239328	183870	86490	141220	2652600	1778200	644027	8484768	70514000	2716000	22964400	3288000	40968.3	192120	26.0134	70.4	3.14869	11.6994	0.36823
2008	330800	729300	1521300	176473	204820	122530	92630	963400	449300	88000	679319	87521000	1456000	17360400	7613000	28519.5	24270	16.8577	40.99	2.08838	10.0566	0.36823
2009	330800	761000	1561300	176663	218010	129570	92720	1011300	484200	128060	953945	81614000	1455000	17798400	7380000	29219.8	22660	17.8909	41.1	2.12454	10.1297	0.36823
2010	330800	761500	1588800	175819	223620	132030	93420	1092300	515700	141191	1070865	74551000	1562000	17318400	6705000	30391.6	20750	19.8647	44.1	2.25432	10.3113	0.36823
2011	330800	793600	1622900	174385	226970	133460	79480	1298800	578500	160404	1254419	76157000	1690000	17967600	6918000	32345.4	32320	20.8527	44.8	2.26178	10.5025	0.36823
2012	330800	796900	1646600	172117	230220	134000	95530	1352000	613000	186297	1388900	75478000	1728000	18098400	6783000	29399.3	45390	18.5582	46.6	2.22685	10.5574	0.36823
2013	330800	799200	1639200	170711	230840	134020	111580	1401700	642900	231627	1655099	75160000	1831000	18626400	6539000	35205.5	64090	21.7029	47.7	2.64106	10.635	0.36823
2014	330800	706700	1629500	169255	207120	110460	108390	1386700	677000	270447	1919400	71496000	1895000	19772400	6206000	34598.5	89740	20.7672	49	2.39008	10.683	0.36823
2015	330800	559700	1601300	167871	209570	91680	104830	1398100	710800	372592	2306709	69869000	1860000	19543200	5938000	35393.1	99100	22.0612	50.2	2.57521	10.7078	0.36823
2016	330800	554700	1552400	169206	211040	88100	104170	1451600	691900	417269	2680843	63248000	1837000	19406400	4859000	36883.8	102020	22.1178	53.7	2.80994	10.7934	0.36823
2017	330800	560600	1384300	172209	184240	90110	104600	1296000	712100	420814	3004654	62512000	1885000	19897200	3785000	40151.4	108090	22.4455	55.7	2.98361	10.8513	0.36823
2018	330800	572800	1354600	175874	182510	87950	105180	1285100	700600	488712	3559423	56926000	1747000	20424000	3239000	36515	112850	21.5879	58	2.68091	10.9508	0.36823
2019	330800	540400	1361700	177521	186880	87930	104740	1388700	724400	481385	4490028	54474000	1059000	19777200	2519000	39191.3	121000	23.4932	60	2.84242	11.0188	0.36823
2020	330800	550900	1325100	179240	173280	89260	104740	1483300	744600	539442	4596505	52950000	1022000	18949200	2415000	39881.1	120000	22.2786	57.57	2.90446	11.0631	0.36823
2021	330800	553700	1284800	180022	171620	89530	104750	1411800	732700	699593	5188733	52524000	999000	17614440	2263990	38253.6	142950	21.3096	58.1	2.8151	11.2021	0.36823
2022	330800	556000	1263400	183077	172620	89920	99340	1480200	763600	715363	5677004	52192000	934000	16634400	2078000	42328.1	174120	24.011	59.3	2.88252	11.2715	0.36823
2023	330800	566000	1266400	185854	174680	90150	99730	1524800	794300	789472	6064818	52131000	869000	15982800	1982000	39056.5	200200	21.7568	60.6	2.87419	11.3337	0.36823
2008	330900	30100	1682400	18780.9	19760	6470	12540	950324	71581	87912	767785	4354000	198687	716856000	413000	29412.9	2050	17.188	61.91	2.18763	10.8329	0.36823
2009	330900	31000	1728200	18580.4	20150	6550	12880	979913	79726	139614	827392	5038000	211911	679784400	404000	31418.3	1970	20.4665	62.4	2.14717	10.9207	0.36823
2010	330900	25352	1719100	17968	18090	5290	12850	1143350	87485	194688	1050303	5299000	225135	680088000	439000	31773.9	1980	20.7519	63.6	2.2099	11.1062	0.36823
2011	330900	24213	1764200	17304.3	17520	4860	12970	1392131	94717	357540	1481022	6039000	238359	681652800	495000	31198.7	2030	20.1533	64.3	2.3492	11.2856	0.36823
2012	330900	26992	2156400	16626.2	17590	5260	13930	1496750	98413	303979	1552230	5034000	251583	681142800	532000	34346.3	2480	19.8202	65.3	2.462	11.3825	0.36823
2013	330900	22704	1564400	15952.5	16810	4750	14890	1690607	102420	490048	1898260	4829000	253491	687720000	708000	33491.5	8770	22.1428	65.8	2.40454	11.4686	0.36823
2014	330900	24475	1593700	15274.9	15560	4920	15070	1769248	100807	397730	1881904	5123000	249443	702080400	667000	30697.9	4680	20.229	66.3	2.30201	11.5534	0.36823
2015	330900	23600	1626100	14469.9	15810	4710	15110	1914138	100313	490896	2396523	4338000	247044	714823200	501000	37001.6	5550	21.7636	66.9	2.51731	11.6285	0.36823
2016	330900	25410	1556100	13810.3	16160	5080	15220	2167669	105093	521795	2505417	4380000	243027	730723200	448000	37913.3	5940	23.3151	67.5	2.61608	11.7595	0.36823
2017	330900	25532	1369400	13039	16180	5130	15310	2403341	104132	514328	2586044	4207000	232015	740242800	447000	36806	7080	20.5195	67.9	2.78971	11.7421	0.36823
2018	330900	26054	1385900	12572.1	15410	4880	15360	2613298	97962	606175	3084897	4209000	221658	753668400	444000	39950.1	9190	26.5628	68.1	3.08435	11.8185	0.36823
2019	330900	26484	1270500	12281.3	15770	4970	14560	2675221	100796	572039	3233611	4156000	208430	740649600	438000	37309.3	13710	21.1469	68.6	2.64413	11.8597	0.36823
2020	330900	28729	1195500	12283.2	15540	5260	14560	2808763	102071	503580	3126851	3999000	185172	730900800	368000	40116.8	25930	22.2604	71.9	3.07789	11.962	0.36823
2021	330900	28640	1185500	12440.5	15290	5290	14560	2855458	107796	479786	3361101	3962000	150222	787383240	344120	40718.6	19930	22.6594	72.2	2.71984	12.0867	0.36823
2022	330900	29180	1206800	12951.2	15790	5820	14560	3055235	113717	487133	3542734	3907000	145147	783709200	324000	39166.5	25470	24.2721	73.2	2.83202	12.2326	0.36823
2023	330900	33530	1310000	13430.8	16950	6580	14560	3439900	132500	594824	3765089	3843000	147822	780806400	306000	41573.2	29900	23.135	74	2.77693	12.3156	0.36823
2008	331000	934734	3414500	179047	283690	173870	127670	2119570	803703	130179	1538100	88334000	1.84886e+06	625944000	5340000	28288.7	13590	17.9793	51.48	1.96608	10.441	0.36823
2009	331000	846018	3469700	178231	271542	158650	127670	2303842	871347	203871	1759500	91545000	2.02939e+06	649704000	5093000	30988.2	13280	17.5167	51.7	2.38937	10.4709	0.36823
2010	331000	827542	3600000	176297	265434	152370	127350	2760166	1055423	260585	2227600	90977000	2.20992e+06	711960000	4850000	27272.2	6120	17.5217	55.5	1.80174	10.6361	0.36823
2011	331000	789250	3737200	173541	254589	141130	121720	3289011	1176929	373425	2655300	89670000	2.39045e+06	727021200	4727000	31415.4	8630	18.9196	56	2.2635	10.7566	0.36823
2012	331000	791920	3676800	169906	251367	137440	128540	3491510	1264092	392910	2879300	90370000	2.57098e+06	733924800	4605000	30986	16270	19.504	56.9	2.36986	10.8049	0.36823
2013	331000	799124	3200700	165500	252862	140060	135360	3729627	1296656	507938	3290300	92561000	2.62985e+06	764320800	4515000	33557.4	31100	18.8155	58.1	2.33806	10.8797	0.36823
2014	331000	602159	3167200	159964	203604	96100	130300	3793382	1336177	524531	3714700	89528000	2.61226e+06	778477200	4336000	35428.1	38010	21.5499	59.5	2.35277	10.9461	0.36823
2015	331000	607539	3035600	153564	206809	96340	125960	4047708	1380456	699888	4572100	88296000	2.62178e+06	801608400	4189000	33898.3	47350	19.8062	60.3	2.60999	10.9934	0.36823
2016	331000	487564	2930500	147978	191510	79780	124740	4314001	1430001	728122	5144000	87777000	2.60405e+06	801120000	3106000	36316.4	53980	23.3357	61.3	2.65765	11.0818	0.36823
2017	331000	498467	2692800	144722	197100	82500	125050	4532008	1496762	756782	5631000	90159000	2.57517e+06	790670400	3053000	36600.9	55610	22.7177	62.2	2.64512	11.1934	0.36823
2018	331000	510838	2563200	143285	199175	82030	125130	4769554	1553968	720018	6537500	88791000	2.52625e+06	763868400	2788000	38316.1	66960	24.613	63	2.58682	11.2969	0.36823
2019	331000	502482	2415500	142999	201416	82580	123310	5032840	1642302	714661	7703300	86176000	2.42689e+06	710282400	2727000	37168	78690	23.4056	63.7	2.65472	11.3455	0.36823
2020	331000	520867	2205900	144312	200341	85500	123310	5250344	1712898	744922	7001400	80435000	2.17553e+06	729556800	2623000	36425.9	110370	23.8015	62	2.67486	11.3711	0.36823
2021	331000	559969	2137800	146277	203713	87720	124690	5.42714e+06	1.82997e+06	759018	7348100	77443000	1.76632e+06	575370180	2600430	38294.2	167000	24.0317	62.6	2.82319	11.4667	0.36823
2022	331000	566699	2105500	149638	203526	88960	122440	5720565	1932259	803188	8349300	76847000	1.67702e+06	541603200	2552000	45561.9	185600	29.1653	63.9	3.16799	11.5114	0.36823
2023	331000	575892	2070500	152699	205924	89310	124910	6.09009e+06	1.9682e+06	859900	8366100	76586000	1.68064e+06	523303200	2522000	39098	217840	24.5361	64.8	2.88245	11.5452	0.36823
2008	331100	528200	962700	60525.9	192090	122230	83270	840327	556185	104100	857748	60926000	511869	11700000	3079000	28526.6	12580	16.4799	44.9	2.07887	9.89329	0.36823
2009	331100	459700	1006000	57765.1	183810	110240	83860	880513	602544	137500	1128670	61663000	603530	10852800	3114000	29096.1	5630	16.7602	46.5	2.23562	9.96337	0.36823
2010	331100	421800	1032900	56553.9	176860	102260	86760	940059	631414	179100	1352045	62137000	695190	11316000	3122000	28062.9	8780	18.3521	48.4	2.02676	10.1482	0.36823
2011	331100	416700	1067300	57123.5	172670	99130	92990	1068253	702844	237200	1542833	61710000	786851	11733600	3113000	30229.3	14000	19.3676	66.5	2.21155	10.3661	0.36823
2012	331100	404500	1108300	58057.5	170710	97330	92070	1158585	762816	257300	1679400	61678000	878512	12528000	3131000	31256.7	29850	20.416	52.5	2.27837	10.4355	0.36823
2013	331100	393300	1119800	61716.1	169690	96860	91150	1226780	806850	366600	1953767	62532000	980690	12993600	3062000	34616.8	41520	22.5719	53.8	2.36614	10.5255	0.36823
2014	331100	384900	1124900	64679.8	164290	89460	94760	1282513	874151	390700	2172733	62321000	1.05624e+06	12912000	2957000	36012.3	46550	23.5176	55.2	2.61006	10.5862	0.36823
2015	331100	361400	1124300	65556.3	163120	71410	98190	1309987	891514	477800	2793261	60442000	1.11924e+06	12522000	2887000	32713.1	42320	18.1903	56.4	2.27694	10.6315	0.36823
2016	331100	337800	1092700	66970.8	159150	67250	97830	1368617	918553	564300	3416717	57170000	1.17853e+06	12367200	2791000	38048.2	27430	21.9405	58	2.88034	10.7179	0.36823
2017	331100	340300	955500	69010.7	134950	67920	93640	1409897	955306	572100	3786403	57523000	1.22797e+06	11847600	2686000	38387.3	22200	23.3316	59.7	2.83536	10.7473	0.36823
2018	331100	358500	952800	70982.9	135800	69180	94850	1435741	976799	598000	4320191	55617000	1.2515e+06	11518800	2565000	40323	32840	22.7446	61.5	2.90125	10.8523	0.36823
2019	331100	362000	953100	72519.5	137210	70480	94410	1542861	1012380	641400	5264959	51476000	1.23075e+06	10839600	2321000	39005.6	53190	23.8121	63	2.69715	10.906	0.36823
2020	331100	375000	956100	74628.8	138670	72880	94410	1617827	1011493	640000	5270971	49936000	1.12504e+06	10578000	2217000	42907.2	65610	28.1775	61.8	3.26196	10.9496	0.36823
2021	331100	417700	953900	74893.1	137450	73040	97010	1590955	1069821	655500	5456911	49119000	904349	9382152	2131250	37573.7	73020	23.3396	62.5	2.6297	11.0562	0.36823
2022	331100	413100	981400	76135.7	138910	73620	91630	1698597	1123474	761000	6071018	47437000	853267	9254400	2061000	41748.2	96340	24.5425	63.5	2.9498	11.1282	0.36823
2023	331100	433900	997500	78172.5	141770	73750	109810	1778543	1190294	864300	6536540	46328000	860385	9175200	1985000	38362.3	125130	23.8295	64.6	2.6849	11.1973	0.36823
2008	340100	1866346	1670300	972536	478790	276626	245360	1800429	857430	87685	2071808	188859000	2380000	47614800	4832000	18114.7	123950	10.4142	43.15	1.32647	10.4401	0.145363
2009	340100	1904020	1786300	970196	497410	278363	244280	1857859	883059	130325	2458575	191684000	2405000	50263200	4489000	15942.4	105470	9.99946	64.1	1.1541	10.6637	0.145363
2010	340100	1935224	1883800	968796	497007	282626	244950	2276350	1067382	149906	3177157	196981000	2682000	50000400	4577000	17482.8	71110	10.535	68.5	1.24708	10.9075	0.145363
2011	340100	3213412	3580400	968140	751154	475169	272940	3648662	1729166	339547	4748895	315919000	4109000	82327200	5976000	19503.4	80880	12.6662	64.6	1.3732	10.8494	0.145363
2012	340100	3033780	3783700	964807	750314	483153	364170	4011797	1961762	404709	5722899	314245000	3938000	82339200	6047000	23081.2	151110	14.7502	66.4	1.63779	10.9787	0.145363
2013	340100	2996768	3970600	956672	743267	485037	455400	4321854	2091689	496045	6308509	315477000	4439000	84517200	5829000	22473.7	146960	12.8603	67.8	1.64362	11.0925	0.145363
2014	340100	3122533	4150100	946899	751371	492438	456770	4503240	2205454	485042	6987901	316718000	4309000	82318800	5531000	21016.1	155620	12.8696	69.1	1.3971	11.1938	0.145363
2015	340100	3233071	4338000	937742	754301	496676	458400	4682357	2349577	550312	7726647	296858000	4386000	84060000	5098000	23094.5	160110	14.0529	70.4	1.71051	11.2755	0.145363
2016	340100	3103767	4537700	927845	755622	501792	458500	4801075	2407086	600625	8598503	278573000	3703000	83641200	4722000	23752.7	203780	13.521	72.05	1.58877	11.3615	0.145363
2017	340100	3156531	4705000	920408	754456	509319	460390	4859141	2462113	573994	9653444	257746000	3862000	80486400	4433000	22818.9	208630	14.1097	73.75	1.56236	11.4537	0.145363
2018	340100	3013528	4850000	916762	681658	525604	459690	4748227	2448395	673871	10049099	243242000	3697000	80468400	4177000	23881.7	224450	13.9539	74.97	1.65151	11.5445	0.145363
2019	340100	3011947	4956200	912665	680437	523327	460890	4944925	2571677	751064	11226669	233652000	3743000	80940000	4011000	26186.6	232590	15.4971	76.33	1.81102	11.7134	0.145363
2020	340100	2889469	5037800	907870	689100	523359	459900	5242558	2747992	836181	11643459	228203000	3602000	88358400	3824000	25078.8	312870	16.3375	82.28	1.8909	11.7641	0.145363
2021	340100	2941278	5089800	906721	697000	527145	462630	5508640	2918659	868695	12237236	214194000	3486000	83964000	3332000	27395.5	392930	16.9001	84.04	2.01936	11.877	0.145363
2022	340100	2.94229e+06	5137100	911136	701900	525335	421210	5840878	3061534	903136	13801794	203810000	3441000	85093200	3105000	24309.1	539130	15.8147	84.64	1.77554	11.9195	0.145363
2023	340100	2.98742e+06	5175000	914640	714000	527015	379790	5762826	2971782	931332	14113371	202909000	3396000	85569600	2946000	27970.5	673110	17.2548	85.55	2.06175	11.9549	0.145363
2008	340200	830385	967100	476540	204483	118334	108165	705267	331018	44512	843060	69300000	820000	16767600	6858000	17626.2	1090	9.72871	49.27	1.2649	10.3884	0.145363
2009	340200	848808	1008400	472210	208802	121842	86960	748913	355003	62596	1084741	65500000	859000	15958800	6270000	19853.1	31000	11.3204	66	1.47882	10.5764	0.145363
2010	340200	835401	1063300	468545	206026	122112	198360	867594	432005	74884	1444290	67600000	776000	17002800	7278000	20071.3	30340	12.1986	65.6	1.53184	10.7853	0.145363
2011	340200	1420216	1830100	466956	387099	198813	199120	1931934	886175	200468	2381774	145200000	1516000	40759200	7701000	19452.7	29600	10.9249	56.3	1.3222	10.6696	0.145363
2012	340200	1336993	1903500	466125	381179	197892	199120	2112911	964160	220639	3022090	155200000	1708000	44074800	4608000	21352	76130	12.2738	58	1.61887	10.7969	0.145363
2013	340200	1327099	1974900	463705	374452	198743	199120	2293256	1014378	254352	3196317	165000000	1704000	46089600	4301000	19694.4	77580	11.1162	59.4	1.50731	10.9079	0.145363
2014	340200	1384299	2038000	458898	377645	204715	199120	2413042	1055176	257858	3466498	1.73403e+08	1168000	47823600	2718000	18859.9	68530	12.2943	60.7	1.38117	11.0032	0.145363
2015	340200	1434272	2102300	452892	377571	206557	199120	2521548	1111813	284190	3936758	1.71469e+08	1244000	49698000	2835000	25261.6	80100	16.2448	61.96	1.6959	11.0645	0.145363
2016	340200	1372628	2165900	448339	370174	209098	199120	2702095	1167338	276172	4094405	1.65294e+08	1157000	48979200	2554000	21047.1	98620	13.8672	63.46	1.38938	11.1501	0.145363
2017	340200	1398708	2113900	446834	364487	212455	200470	2547359	1174711	267552	4632994	178600000	1220000	49748400	2364000	25056.8	97030	14.6594	65.05	1.87524	11.2434	0.145363
2018	340200	1396991	2159800	447002	326217	221713	212420	2431736	1195105	264392	4570422	174000000	1211000	49264800	2175000	24344.4	102820	15.8453	65.54	1.61873	11.3419	0.145363
2019	340200	1391943	2192600	447051	325782	220809	182640	2671406	1340364	231198	5024765	167500000	1103000	48313200	2051000	25240.9	111260	14.2301	66.41	1.93448	11.4379	0.145363
2020	340200	1351357	2239900	446957	329953	222354	197250	2966291	1486673	379355	4856366	163000000	729000	49461600	1994000	28544	141460	17.4486	72.31	2.11392	11.4771	0.145363
2021	340200	1387629	2280100	448778	336946	223152	203180	3097726	1392070	404373	5034947	160500000	681000	49572000	2851000	25607.6	172020	14.7919	72.99	1.70711	11.6164	0.145363
2022	340200	1396000	2344000	452562	339548	222679	212900	3281493	1450662	472576	5828795	1.43287e+08	674000	50149200	3708000	23298.8	224960	13.3821	73.55	1.56698	11.6642	0.145363
2023	340200	1.41622e+06	2390400	455350	348703	223609	222620	3329634	1483737	491588	6192234	1.42205e+08	667000	50726400	4565000	26145.1	291500	15.1023	74.46	1.74294	11.7159	0.145363
2008	340300	2534185	4396000	545385	624536	452703	199570	1639570	905639	39692	735994	267122000	5926000	60111600	5275000	18597.4	5270	11.1161	27.98	1.37143	9.51594	0.145363
2009	340300	2644086	4557600	544129	635766	468294	202390	1706591	974343	79863	877276	275375000	5810000	65598000	5323000	17014	71040	10.6023	46.6	1.30986	9.59927	0.145363
2010	340300	2710183	4822700	542677	645880	473914	204760	1979370	1171084	93501	1069849	284314000	5727000	67100400	5508000	20917	89750	11.9747	45	1.43316	9.77465	0.145363
2011	340300	2761548	4988700	541833	650647	478779	198590	2358475	1345178	150313	1412099	292527000	5897000	69356400	5652000	22385.6	99080	13.3277	46.6	1.66792	9.96867	0.145363
2012	340300	2612155	5044000	539520	631295	455747	212100	2596298	1453174	193095	1651674	296201000	6146000	68658000	6321000	23176.7	132210	14.938	48.3	1.60445	10.0943	0.145363
2013	340300	2635964	5244400	535115	629764	457616	225610	2813745	1544318	231756	1914991	305224000	5972000	71385600	6550000	22090.2	139200	13.4641	49.7	1.66129	10.2216	0.145363
2014	340300	2755120	5333100	529993	637391	470199	232310	2968302	1636410	234700	2085574	301324000	5775000	70005600	6305000	21977	145900	13.4233	50.9	1.669	10.3424	0.145363
2015	340300	2865876	5383500	525131	638769	475042	237150	3136728	1710389	261414	2447171	309982000	5977000	70095600	6298000	20271	151480	13.166	52.22	1.44347	10.4132	0.145363
2016	340300	2805012	5480600	520743	641511	483260	242840	3352480	1754461	294821	2680543	307070000	5605000	70797600	6062000	20530.6	180390	11.4165	53.74	1.50384	10.5042	0.145363
2017	340300	2858588	5597600	518521	647694	490509	247630	3471651	1826278	277585	2977139	305153000	5739000	70274400	6008000	26405.3	189060	15.4903	55.31	1.95001	10.614	0.145363
2018	340300	2770621	5565300	517529	631644	515681	246620	3482845	1817505	255942	2957942	301092000	5396000	72664800	5725000	21344.9	195960	13.4348	57.22	1.44809	10.7067	0.145363
2019	340300	2821271	5675500	515671	633011	514869	300380	3888679	1942050	306444	3375154	290051000	4640000	69055200	5232000	27998	187980	17.4109	58.58	1.93093	10.8835	0.145363
2020	340300	2805504	5841100	514330	636088	515291	304100	4270283	2061258	384602	3259399	276713000	4459000	68041200	4520000	23602.4	220980	15.4691	55.08	1.75634	10.8948	0.145363
2021	340300	2833882	5944500	514391	634248	514687	354700	4548663	2232073	395903	3288080	266241770	4341500	67364400	4222270	28471.1	282150	17.1332	56.9	1.91262	10.8473	0.145363
2022	340300	2.86021e+06	6118700	515401	640652	518303	302800	4814917	2423773	407047	3595272	261768000	4117000	66399600	4115000	28755.7	478070	17.4325	57.92	2.1386	10.8588	0.145363
2023	340300	2907177	6267700	516418	646631	522906	250900	4665728	2368404	428576	3692074	259995000	3892500	65434800	4.00773e+06	29068.7	540620	17.4928	59.65	1.95277	10.9084	0.145363
2008	340400	1340594	1581200	497653	246133	211742	103580	593304	327600	31419	543060	129411000	417000	43669200	5650000	19680.1	2230	11.3067	46.9	1.50279	9.8433	0.145363
2009	340400	1370142	1652700	496844	245074	210124	103600	632956	350598	53702	696485	131874000	435000	42985200	5587000	16598.3	18250	9.89435	64.1	1.17739	9.95126	0.145363
2010	340400	1391267	1696300	495317	248374	212174	103730	718143	402911	67909	810173	132655000	499000	41781600	5837000	19244.2	27200	11.7469	62.9	1.34878	10.116	0.145363
2011	340400	1415526	1738500	494391	249708	212357	87470	843379	458029	95509	1096382	134276000	487000	41871600	5864000	17271.9	37480	10.2628	63.7	1.19785	10.2713	0.145363
2012	340400	1337676	1785600	493554	241777	203313	104700	914256	498899	120013	1489483	140753000	535000	42001200	5857000	20563.8	48220	12.2019	65.3	1.38715	10.3755	0.145363
2013	340400	1339415	1812700	491789	243768	204045	121930	996855	540724	133798	1686273	140922000	618000	41386800	6133000	19015	42030	10.5843	66.7	1.34173	10.4246	0.145363
2014	340400	1394287	1848800	488960	247984	207122	122080	1045054	568618	134687	1459783	151467000	645000	43470000	6033000	21677.7	40100	12.7767	67.9	1.67466	10.3868	0.145363
2015	340400	2943090	4267400	486585	492178	432434	283180	1903430	892463	146567	1534525	141324000	1105000	105757200	12708000	23383.3	77200	13.3238	60.67	1.55147	10.0649	0.145363
2016	340400	2848380	4440400	484299	499518	439914	283330	2032599	939829	247571	2180016	290765000	1134000	104834400	12274000	19824.8	123330	11.3275	62.05	1.32886	10.1177	0.145363
2017	340400	2896518	4466500	482121	495746	435064	283330	2089926	982998	234057	2332828	283845000	1139000	103623600	12035000	21721.9	123830	13.5894	63.46	1.44151	10.2104	0.145363
2018	340400	3202174	4515600	480325	570030	531941	283330	2081469	1151119	247305	2451702	279515000	1077000	103144800	11756000	22586.5	151470	14.0215	64.11	1.73185	10.2771	0.145363
2019	340400	3188632	4544300	477757	570220	526868	283330	2246580	1181740	243400	2620841	268314000	1106000	97837200	10923000	24682.4	138620	15.8333	65.04	1.84602	10.4087	0.145363
2020	340400	3074460	4568900	475817	574149	526279	283340	2473293	1285553	517338	2881068	261046000	1109000	93015600	9404000	24756.2	162810	15.7161	61.08	1.66632	10.4411	0.145363
2021	340400	3170644	4605900	475888	580113	529876	283350	2606093	1362506	624929	2776414	252475000	1128000	91057200	8908000	26329.9	223840	17.082	61.91	1.75807	10.5283	0.145363
2022	340400	3.17676e+06	4689300	477809	582000	531610	283360	2743268	1446056	564806	2994527	247238000	1141000	91303200	8491000	25682.1	363310	16.9071	62.05	1.97889	10.5895	0.145363
2023	340400	3.22441e+06	4742100	479591	599759	530451	283370	2635116	1424410	570897	3160411	243949000	1154000	91549200	8074000	26882.6	433700	17.4406	63.29	1.79497	10.6127	0.145363
2008	340500	446366	467400	310545	98062	64935	52080	370182	142688	20492	561810	9.29926e+07	326000	7480800	2781000	16338.3	1600	10.4739	49.23	1.20441	10.8132	0.145363
2009	340500	463826	485100	308052	96429	65710	52150	391372	145632	30966	800721	9.45568e+07	335000	5979600	2424000	16798.1	16760	9.8059	67.3	1.18808	10.8547	0.145363
2010	340500	468416	490900	305797	96712	66676	52230	432854	167764	32919	865282	96121000	338000	5805600	2413000	21703.4	15510	12.2343	69.1	1.55948	11.048	0.145363
2011	340500	1070448	1285800	304543	238143	146094	110210	1119326	568898	116998	1382943	93554000	954000	16200000	4014000	17985.1	16180	10.4969	59.4	1.23804	10.8208	0.145363
2012	340500	1016390	1291400	304196	242868	153201	129030	1217152	639258	148842	1903672	90144000	946000	17084400	3663000	19485.9	52060	10.873	61.2	1.42469	10.8956	0.145363
2013	340500	1017915	1378100	303681	235763	153540	147850	1315821	664752	172814	2025888	86591000	899000	16273200	3720000	21739.2	56680	14.4184	62.6	1.56177	10.9438	0.145363
2014	340500	1062564	1415800	300631	232663	155120	147850	1386018	693916	179328	1824561	84299000	1024000	16723200	3732000	18794.4	58560	11.9231	63.9	1.34008	10.9798	0.145363
2015	340500	1101241	1478200	295304	231593	156826	147850	1438686	719478	200940	2031770	80470000	981000	16857600	3659000	21359.1	58160	13.3164	65.15	1.5824	10.9979	0.145363
2016	340500	1054733	1515800	289656	231008	158352	147850	1514270	729396	203089	2136960	78878000	1007000	16819200	3563000	19825.7	72420	12.5225	66.49	1.4802	11.0857	0.145363
2017	340500	1072769	1446300	284573	233952	160711	149850	1537961	734992	169497	2276986	78453000	1011000	16695600	3536000	24295.8	75330	14.3471	67.89	1.81514	11.2209	0.145363
2018	340500	1090329	1551600	281967	230110	176941	149850	1527428	712971	137963	2265572	77607000	1023000	16603200	3466000	25575.8	78850	14.2249	68.25	1.96814	11.3357	0.145363
2019	340500	1087139	1533100	280221	230424	176244	149850	1632763	758362	171913	2533325	74346000	1019000	16188000	3174000	21894.9	79250	12.5878	69.12	1.61387	11.4315	0.145363
2020	340500	1047960	1564000	279556	231455	175950	149570	1731254	795246	243757	2648224	72843000	1037000	15476400	2995000	26404.2	88780	14.7068	71.69	1.75954	11.4691	0.145363
2021	340500	1060251	1574100	281868	233224	176698	147260	1807865	832694	281963	2874117	72291000	1023000	15470400	2976000	24679	114410	15.7779	72.39	1.72263	11.5803	0.145363
2022	340500	1067966	1623900	286267	235346	176556	134050	1913380	867447	282119	3178088	71871000	1022000	15511200	2921000	28826.1	140030	17.0753	72.9	2.19688	11.6178	0.145363
2023	340500	1.08444e+06	1665400	290365	241653	176767	120840	1902416	871773	292841	3203300	71548000	1003000	15106800	2892000	25197	193410	16.1091	73.62	1.75879	11.6344	0.145363
2008	340600	1157431	2148400	240156	289196	260216	127260	580672	343480	29633	409713	87600000	533000	25729200	1766000	18281.3	6070	11.5291	43.2	1.29071	9.69141	0.145363
2009	340600	1207201	2292200	239913	284593	260122	129960	599687	358761	45214	542611	83200000	428000	28196400	1993000	20877.1	12980	13.6848	56.1	1.58196	9.74559	0.145363
2010	340600	1245621	2403500	239413	287845	264200	140730	682080	412796	54456	659289	85500000	411000	31810800	1940000	17275.7	33940	10.593	54.5	1.21151	9.95342	0.145363
2011	340600	1261757	2505900	238434	286387	266485	148430	792358	456012	68102	872917	97600000	389000	31938000	2519000	18544.1	35660	10.4863	55.7	1.24976	10.1274	0.145363
2012	340600	1190089	2570600	237012	253911	234414	144950	866952	490809	104260	1085342	99600000	416000	32268000	2619000	19897.9	45820	12.2854	57.2	1.40872	10.2551	0.145363
2013	340600	1200800	2683600	235544	255013	235375	141470	960857	549291	111610	1087215	98800000	495000	31424400	2591000	21454.5	43580	12.1798	58.5	1.57494	10.3983	0.145363
2014	340600	1250195	2762200	233662	257683	238881	142130	1010262	573594	110635	1160077	100700000	873000	30898800	2923000	18497.6	41380	10.639	59.8	1.27759	10.4711	0.145363
2015	340600	1297827	2875200	232162	260224	240553	142870	1025891	571599	115911	1314355	107400000	438000	30813600	3316000	22812.4	42550	12.7911	60.76	1.67937	10.4666	0.145363
2016	340600	1268831	2960700	231185	262261	243199	143230	1083248	562461	126030	1426554	106100000	281000	30310800	3257000	24759.2	54760	14.8135	62.13	1.789	10.5138	0.145363
2017	340600	1295476	2621300	230233	265506	246604	143600	1105755	587646	147582	1527736	106400000	249000	28504800	2609000	23436.2	56240	15.4548	63.61	1.68043	10.6592	0.145363
2018	340600	1441808	2676500	229450	290327	275670	144020	1082677	603544	132271	1667011	105900000	269000	28186800	2593000	25867.2	66340	15.7625	65.11	1.84162	10.7187	0.145363
2019	340600	1491511	2690200	228724	290855	275052	145630	1203467	655353	147122	1900091	100000000	268000	33075600	2444000	25437.7	65160	14.8459	65.88	1.7411	10.8041	0.145363
2020	340600	1493605	2781300	228133	291435	275172	147160	1338407	727926	181750	1837610	91900000	293000	32628000	2311000	28319.6	80630	15.8743	64.16	2.06597	10.8415	0.145363
2021	340600	1509972	2832900	228277	292176	275337	148690	1449984	749522	198002	1958243	91700000	287400	33835440	2147900	26199	102750	16.9722	64.78	1.98935	10.9303	0.145363
2022	340600	1.51319e+06	2862300	229077	291725	276766	150220	1508139	777403	228160	2140233	91600000	288100	33667200	2078800	23014.6	171720	14.0724	64.92	1.71355	10.9983	0.145363
2023	340600	1.52597e+06	2890100	229709	291999	277551	151750	1515147	799083	240996	2269902	91600000	288800	33363480	2043500	26748.9	201010	17.3285	65.64	2.0311	11.0476	0.145363
2008	340700	510363	752026	193639	141460	102239	25730	490873	218713	16390	357598	20088000	192000	5721600	912000	18536.6	1590	10.6389	58.82	1.24556	10.6925	0.145363
2009	340700	509945	768327	192531	151161	106483	25910	527807	242712	20502	486384	20461000	75.5291	5502000	880000	18818.8	6200	11.9553	76.4	1.34489	10.7463	0.145363
2010	340700	486968	786756	190902	150068	105031	25960	557954	251167	22016	573219	51139000	76.6576	5511600	764000	20195.2	5000	11.3782	73.5	1.4268	11.0518	0.145363
2011	340700	488687	806530	189171	148614	107415	26060	627566	273900	23730	706635	23216000	801619	5347200	718000	19735.8	6430	12.2001	74.9	1.41648	11.2656	0.145363
2012	340700	497938	826637	187312	141429	97654	24980	670171	289724	44664	963949	24363000	824615	5401200	733000	20425.9	8720	11.4274	76.3	1.53609	11.3354	0.145363
2013	340700	513916	847418	185556	141089	97604	23900	720871	298265	49829	1005932	24550000	209000	5332800	787000	21131.3	10940	13.589	77.6	1.42573	11.4266	0.145363
2014	340700	533227	862818	183401	145736	102354	23900	773973	313789	54644	1052923	24715000	216000	5566800	717000	19209	11370	11.2965	78.7	1.3504	11.4831	0.145363
2015	340700	562503	883738	180829	140695	98918	81690	804406	323100	60171	1108225	62553000	492000	10779600	2054000	20916.7	41920	12.6034	52.73	1.51705	11.7242	0.145363
2016	340700	548900	901936	178273	139602	99481	82630	776090	319423	139550	1510941	55921000	431000	7554000	1874000	21587.3	50490	14.0429	54.14	1.61371	10.9328	0.145363
2017	340700	567448	868608	176921	140336	101989	83880	791392	328085	123483	1602757	55522000	419000	8110800	1735000	24205.4	53240	15.2897	55.79	1.72155	11.0916	0.145363
2018	340700	581653	838975	176407	139628	101123	84620	814347	349923	121437	1543463	55558000	419000	8448000	1623000	23283.9	55050	14.3167	55.99	1.5796	11.1772	0.145363
2019	340700	579921	840197	176018	139209	100708	66410	846209	369133	131734	1689119	54913000	404000	8610000	1532000	27284.9	52900	17.2595	57.16	2.03702	10.9356	0.145363
2020	340700	562786	849685	175962	140676	100449	71790	910090	411729	204980	1824860	52564000	429000	8731200	1463000	23439.8	57410	15.4533	66.17	1.63604	10.9863	0.145363
2021	340700	573731	861603	176391	140739	100711	77170	948672	433117	206782	1946768	51066000	404000	8817600	1447000	26406.5	71030	16.3109	66.33	2.03482	11.1418	0.145363
2022	340700	578347	753768	177938	141212	101075	82550	996538	468438	211459	2008682	50355000	396000	9050400	1364000	29716.6	78510	18.9494	66.45	2.11485	11.1848	0.145363
2023	340700	585452	741693	179179	145992	101443	87930	1021306	481454	218051	2139497	49251000	388000	9283200	1281000	26960.7	105460	16.6532	67.2	2.07753	11.1996	0.145363
2008	340800	2604155	2353300	631576	756490	451651	255790	2284565	970029	106067	1119717	200158000	2769000	44238000	14612000	17476.8	16760	10.0599	17.74	1.2953	9.34832	0.145363
2009	340800	2666162	2509200	626852	775709	452460	256470	2442484	1040283	185295	1399597	214691000	2847000	51721200	13866000	15857.1	103440	9.504	36.6	1.2064	9.43454	0.145363
2010	340800	2619602	2650800	621963	783255	454156	257090	2709162	1169050	215423	1448099	218826000	3062000	53811600	14358000	20611.6	125560	13.5482	36.8	1.43223	9.6835	0.145363
2011	340800	2675744	2809400	618655	772834	450707	192970	3138006	1340266	287545	1911601	230041000	3466000	57312000	14425000	19565.3	150530	11.0233	38.1	1.39154	9.88583	0.145363
2012	340800	2521959	2962600	615813	777516	454967	258540	3414895	1465184	339202	2183423	236669000	3219000	62658000	14058000	19369	180630	12.6516	39.6	1.4577	9.995	0.145363
2013	340800	2476098	3123800	610612	781506	456606	324110	3708879	1539706	390560	2505277	243868000	3298000	68060400	14959000	18241.4	202480	10.0792	41	1.31276	10.035	0.145363
2014	340800	2586441	3283800	603398	794826	460847	324860	3945115	1632884	404210	2691545	254688000	3112000	68494800	12185000	19873.4	192570	13.0973	42.2	1.47705	10.1215	0.145363
2015	340800	2179059	2953600	596540	660336	364071	269830	3506249	1485563	490581	3054154	223594000	3048000	66352800	10796000	23781.9	155600	15.0481	45.87	1.80099	10.0338	0.145363
2016	340800	2085399	3145600	591245	642842	368616	274620	3633271	1507468	535921	3371512	203597000	2997000	67120800	9136000	25048.5	178960	15.9713	47.19	1.94018	10.2731	0.145363
2017	340800	2092241	3155800	588489	637942	365901	275650	3660360	1483023	505508	3730026	199619000	2888000	65103600	8576000	24732.5	197430	15.8887	48.57	1.80324	10.3791	0.145363
2018	340800	1953766	3273300	587781	557861	345821	282010	3552136	1503031	622042	4201888	194892000	2879000	61687200	8001000	21962	175930	13.6866	49.22	1.61123	10.5001	0.145363
2019	340800	1945963	3377500	584894	555980	344335	283150	3825753	1607723	667922	4635724	188476000	2503000	58281600	7607000	24373.3	211290	14.0762	49.98	1.62415	10.7146	0.145363
2020	340800	1903019	3454400	583771	544753	345232	283190	4288674	1796024	775061	4829584	180342000	2335000	59998800	7366000	27804.2	270290	16.5574	55.52	2.03192	10.7534	0.145363
2021	340800	1931691	3503000	585837	547647	346160	283230	4497553	1809704	841630	4830012	177304000	1951000	58140000	7258000	27532.4	299800	18.3289	56.17	1.87233	10.83	0.145363
2022	340800	1.94516e+06	3593600	593092	550013	345835	283270	4693242	1858976	941697	5314193	174348000	1750000	50425200	7089000	23320.1	378290	13.1737	56.29	1.60038	10.8763	0.145363
2023	340800	1973611	3698100	598083	560283	347308	283310	4568453	1798665	996544	5483011	171709000	1549000	42710400	6920000	28110.3	441190	18.7136	57.49	1.91163	10.9135	0.145363
2008	341000	340629	587200	94254.9	128571	66238	43460	580576	271554	46055	462269	66000000	1071000	8384400	2858000	16302.2	3210	10.154	24.07	1.10966	9.73183	0.145363
2009	341000	348949	626300	92747.6	132118	66129	43390	604496	289057	71413	580432	39000000	1202000	8114400	2828000	18383.4	3270	11.0347	39.8	1.38111	9.79603	0.145363
2010	341000	353219	669700	91395	131290	65447	43330	666155	334378	86427	729805	39200000	1227000	8509200	2909000	20930.8	16260	13.4464	41.1	1.45687	9.94717	0.145363
2011	341000	361913	702200	90051	130513	64984	35790	762625	387644	122671	962226	39000000	1270000	8460000	3182000	17249.7	14350	10.3057	42.8	1.27838	10.1495	0.145363
2012	341000	341686	747700	87497.9	130352	64785	42880	820254	418773	145258	1259728	39900000	1257000	9088800	3278000	20201.7	20090	13.4381	44.4	1.43832	10.2698	0.145363
2013	341000	334511	779100	83828.7	129529	64406	49970	892204	458572	175459	1367264	39200000	1361000	10172400	3414000	20690.8	33440	12.6675	45.7	1.50511	10.3706	0.145363
2014	341000	346884	795000	80265.2	129410	64260	49740	917128	475846	185585	1494172	3.03297e+07	1366000	10413600	3395000	20374.9	37990	13.1422	47	1.40806	10.444	0.145363
2015	341000	349770	812900	77464	127356	62475	51230	949528	490577	202267	1598195	38600000	1458000	10414800	3311000	23361.3	38300	15.1217	48.28	1.71997	10.4898	0.145363
2016	341000	334992	834000	77207.3	126158	61685	54650	971198	484260	262344	1710263	36800000	1440000	9019200	3088000	26063.1	40320	16.2346	49.56	1.76785	10.5707	0.145363
2017	341000	328843	808100	78253.2	122333	59445	60340	992008	499916	275283	1857265	36000000	1414000	8814000	2973000	22335.2	40120	13.1007	50.9	1.5266	10.6287	0.145363
2018	341000	292560	826700	80034	95966	50719	60620	979106	525633	233489	1856147	35000000	1365000	8743200	2682000	23853.6	50100	14.1196	51.46	1.70423	10.7254	0.145363
2019	341000	291465	824800	80850.1	97343	50690	61480	1057918	572286	202062	1968199	33000000	1383000	8449200	2545000	26199.2	51830	14.7208	52.49	1.97853	10.9133	0.145363
2020	341000	286598	838800	82065.6	94968	51043	62360	1157441	601920	255001	2062322	31900000	1310000	8376000	2391000	26843.2	63490	17.415	58.29	1.85324	10.9516	0.145363
2021	341000	289747	853000	83219.1	95387	51052	63240	1239734	641135	287134	2138230	31400000	1284000	8276400	2327000	26260.1	82910	15.8063	59.25	2.0399	11.0702	0.145363
2022	341000	292081	870600	85716.2	96399	51288	64120	1299550	654853	309559	2212819	31100000	1305000	8275200	2280000	28047.3	99570	17.5818	59.38	2.13049	11.1297	0.145363
2023	341000	295926	907000	87857.2	98853	51228	65000	1322928	608700	320449	2217283	2.74377e+07	1295000	8132400	2233000	26811.3	111360	16.138	60.23	2.08271	11.1793	0.145363
2008	341100	4123016	4914500	1.16127e+06	854519	679637	350524	2112214	1062969	91038	836922	305760000	2017000	41420400	5699000	15746.9	34630	9.08172	20.99	1.0589	9.361	0.145363
2009	341100	4235091	5326900	1.15777e+06	855730	681234	353032	2280229	1145765	189481	1078925	315701000	2006000	40879200	5816000	15846.8	88000	9.70441	41	1.09846	9.45697	0.145363
2010	341100	4307758	5761200	1.15488e+06	860720	689493	355540	2521549	1244703	200997	1281171	321420000	1675000	43800000	5995000	18068.2	115720	11.8628	41.6	1.38708	9.64416	0.145363
2011	341100	4404865	6083900	1.15475e+06	866655	700336	484000	2923572	1434224	346397	1832473	333835000	1976000	47726400	5676000	17989	110550	10.567	43.4	1.22317	9.84048	0.145363
2012	341100	4150703	6387600	1.15214e+06	872485	709862	485000	3250120	1574696	393994	2310284	339431000	2009000	49638000	5738000	18590.5	175320	10.8993	45.1	1.39515	9.9745	0.145363
2013	341100	4138251	6549000	1.14562e+06	877099	712772	486000	3522974	1674895	448087	2508733	343190000	2074000	50726400	5758000	18257.1	179660	11.1015	46.5	1.35358	10.0926	0.145363
2014	341100	4306925	6782500	1.13516e+06	882260	723137	487000	3696423	1760655	493877	2688462	350860000	2094000	52678800	5853000	22406	184360	12.4642	47.8	1.52577	10.204	0.145363
2015	341100	4450776	7003900	1.12429e+06	888929	730968	490000	3825927	1796738	538217	3026067	357045000	2184000	55518000	5958000	19242.7	196080	11.5734	49.02	1.34872	10.2777	0.145363
2016	341100	4270047	7056500	1.11458e+06	896798	738936	491000	3934345	1787890	591260	3350463	355705000	2207000	57829200	5708000	20996.7	274200	12.8918	50.4	1.60251	10.3526	0.145363
2017	341100	4355448	6905400	1.10903e+06	898419	741373	491000	3966247	1802925	529609	3802745	352863000	2195000	60674400	5556000	23536	249690	14.0214	51.89	1.76803	10.4727	0.145363
2018	341100	4599494	7185300	1.11052e+06	906648	833545	491000	3968832	1852373	427408	4041175	345000000	2201000	61518000	5362000	25248	276300	14.6697	53.42	1.69853	10.5888	0.145363
2019	341100	4645114	7237500	1.11057e+06	904912	829924	491020	4422279	1988337	397152	4551175	322842000	6969000	64784400	5017000	21349.4	268320	12.7115	54.54	1.56004	11.0656	0.145363
2020	341100	4656914	7328300	1.1092e+06	906000	826838	491100	4843535	2181442	713762	4629403	313249000	6840000	63850800	4809000	25414.2	339880	16.5705	61.84	1.88026	11.1081	0.145363
2021	341100	4704130	7366100	1.11283e+06	912000	830298	491100	5102254	2398936	708782	4617105	311085000	6740000	63600000	4760000	24260	474690	13.8217	62.92	1.65588	11.2125	0.145363
2022	341100	4.65867e+06	7412100	1.12711e+06	911000	825142	487000	5401991	2491547	797921	5134690	3.56856e+08	6640000	63349200	4711000	26990.9	597490	16.2206	63.12	2.08004	11.2837	0.145363
2023	341100	4.77138e+06	7453600	1.13869e+06	915000	830733	482900	5315991	2226621	797939	5339080	3.55611e+08	6540000	63098400	4662000	24769.2	694900	14.1118	63.85	1.69063	11.3304	0.145363
2008	341200	5028999	5290400	996908	1208343	972519	362900	3145275	1669431	96648	1028010	376961000	2681000	42568800	7569000	15467.8	12400	9.9288	30.6	1.14333	8.60879	0.145363
2009	341200	5154788	5652600	994392	1210534	987186	366540	3301752	1813641	162473	1339949	363191000	2755000	44800800	6958000	16988.7	55430	10.4933	32.4	1.2717	8.71193	0.145363
2010	341200	5300528	5982200	990858	1192943	1002234	370180	3697884	2085954	202964	1643492	372903000	3121000	47872800	7610000	16508.4	135420	9.27909	31.9	1.27365	8.87258	0.145363
2011	341200	5378148	6345200	986417	1234618	1017416	373720	4332924	2376488	265646	2165641	381386000	3204000	50598000	7142000	20558.2	183130	11.7945	33.3	1.52304	9.0261	0.145363
2012	341200	5233382	6626200	979904	1212664	996893	384120	4641372	2530864	340380	2722879	392859000	3468000	53128800	7888000	20261.4	212440	12.7667	34.9	1.54335	9.13309	0.145363
2013	341200	5261119	6901000	971217	1217577	1000881	394520	5045560	2709940	415343	3126496	400443000	3834000	55352400	7686000	18476.3	228220	11.7069	36.2	1.3694	9.21911	0.145363
2014	341200	5481457	7199900	961452	1227679	1002684	401920	5350782	2898625	455263	3533451	405206000	4261000	57253200	8258000	22545.3	239550	12.8403	37.5	1.50601	9.3333	0.145363
2015	341200	5702909	7408100	952563	1214041	1000218	425080	5536320	2973951	515993	4315957	383842000	4558000	60080400	7688000	23640.6	279350	14.7289	38.81	1.72793	9.40558	0.145363
2016	341200	5571801	7634500	943121	1100716	1003950	432000	5998827	2953132	664149	4358049	369407000	4488000	60894000	7148000	24866.1	206310	15.7251	40.24	1.76636	9.48799	0.145363
2017	341200	5677684	6249300	934261	1106286	1005605	448680	6214765	3061019	769988	5154240	357242000	4574000	62805600	6770000	25171.2	326760	16.545	41.75	1.75365	9.59447	0.145363
2018	341200	5134165	7015100	927733	1115906	973196	460650	6196362	2874567	843210	5746681	350882000	4640000	64221600	6630000	25397.1	361600	14.5928	43.29	1.77813	9.70679	0.145363
2019	341200	5242458	7129300	921996	1118512	969862	474190	6985201	3120804	886955	6552803	334255000	4660000	64850400	6218000	26147.8	373530	16.562	44.62	1.81786	10.1313	0.145363
2020	341200	5216412	7303600	920016	1131139	970799	484390	7854740	3386281	1119482	6713497	327733000	4780000	66369600	6043000	24027.2	500620	13.9281	41.97	1.60447	10.169	0.145363
2021	341200	5298538	7533100	920606	1145558	972834	494590	8327904	3650879	968521	6300493	325224000	4878000	66409200	5965000	27663.9	774340	16.843	42.74	1.99488	10.2613	0.145363
2022	341200	5.33132e+06	7742200	922830	1150742	972939	504790	8737731	3841699	995339	6467379	323641000	4866000	66498000	5895000	24106	944280	13.7266	43.47	1.84226	10.3114	0.145363
2023	341200	5.37215e+06	7903600	924367	1159175	975959	514990	8770901	4011191	1037283	6489756	322557000	4854000	66586800	5825000	28244.5	1009100	17.1965	45.16	2.03676	10.3392	0.145363
2008	341300	3653738	6426300	963948	973048	764247	364710	2678781	1382623	76846	717405	289809000	7056000	133060800	20330000	20059.6	23380	12.3946	13.14	1.37276	9.00747	0.145363
2009	341300	3799887	6880800	962447	980417	776997	366680	2821445	1504302	122891	954915	329138000	7733000	136093200	21513000	20292	128420	11.7126	33.2	1.41956	9.0491	0.145363
2010	341300	3890820	7326800	961377	986613	787113	369160	3219691	1733503	149562	1131874	330200000	7982000	140403600	22276000	19652.8	139440	11.0928	31.4	1.34475	9.22349	0.145363
2011	341300	4000566	7591900	959234	991886	794197	347030	3857321	2100247	235172	1570260	335391000	8386000	138954000	22653000	19595.2	152880	12.8469	33.1	1.32987	9.42239	0.145363
2012	341300	3769734	7876700	953329	996854	802634	379010	4218369	2329413	315017	1937988	336050000	8890000	139858800	23517000	21631.6	185520	13.1029	34.8	1.61538	9.54963	0.145363
2013	341300	3791445	8049800	945640	999796	806005	410990	4480917	2431590	333209	2226623	342400000	9145000	132908400	23151000	21198.4	202490	12.616	36.2	1.63245	9.66789	0.145363
2014	341300	3966744	8279700	938384	1020347	820683	416160	4822625	2669622	366809	2472835	345815000	9450000	135367200	23799000	24266.7	168540	15.1926	37.4	1.65044	9.78453	0.145363
2015	341300	4122637	8525200	932772	1037767	828335	421990	4991376	2773214	439505	2946019	333607000	9452000	138344400	24097000	20944.4	186440	13.3592	38.73	1.55137	9.85362	0.145363
2016	341300	4027979	8746200	927980	1036209	833801	428430	5000653	2616833	487536	3113893	333009000	9800000	137884800	24049000	22397.8	215610	13.6472	40.03	1.63672	9.93643	0.145363
2017	341300	4103060	7396700	924105	1047224	842052	433900	5020417	2608980	485529	3459208	316701000	9820000	136562400	21664000	25500.9	218540	16.3493	41.56	1.81312	10.0148	0.145363
2018	341300	4299184	7584500	920370	1035165	942143	440890	4996922	2582967	498633	3965875	315375000	9861000	137084400	19509000	23854.2	251650	13.8594	42.74	1.72977	10.1191	0.145363
2019	341300	4435070	7774500	917294	1035363	939522	448440	5550607	2824815	551206	4498627	300806000	9591000	139424400	18170000	23865	272920	13.4939	43.96	1.66682	10.3115	0.145363
2020	341300	4496158	8028000	914815	1038028	938215	450210	6070058	2953196	802517	4859988	296969000	8279000	140892000	17814000	27359	297650	15.6184	43.76	1.94167	10.3428	0.145363
2021	341300	4535394	8235900	914484	1038088	934181	489580	6473813	3045666	770829	4740657	296920000	7952000	141390600	14283000	23889.1	374590	14.8783	45.03	1.61461	10.3997	0.145363
2022	341300	4.5795e+06	8562200	916148	1044828	939006	443600	6716306	3163286	781455	5021054	296600000	8024000	141889200	12913000	30033.6	581700	17.2572	46.38	2.12068	10.4271	0.145363
2023	341300	4.60202e+06	8859400	917487	1048694	940911	397620	6768547	3173852	789827	5019666	295961000	8096000	142387800	11543000	24390.5	644080	15.1906	48.09	1.6485	10.4504	0.145363
2008	341500	4373569	5218700	807845	874069	668966	380260	2323564	1024452	121519	1011315	351045000	2272000	100287600	8671000	15814.6	50650	9.2037	16.21	1.09738	8.93722	0.145363
2009	341500	4506857	5638700	804274	881402	675616	381460	2490531	1087273	209611	1329039	358928000	2989000	106906800	9315000	19691.3	108000	12.9102	36.9	1.44899	9.02082	0.145363
2010	341500	4590956	6044000	800941	894280	688976	382390	2803973	1248763	249191	1539278	365637000	3339000	115677600	11342000	17858.7	121030	10.192	35.9	1.21396	9.16877	0.145363
2011	341500	4758980	6224800	797246	889244	702314	186960	3224778	1451431	351636	2097019	371309000	2935000	120344400	13643000	22253.5	146780	13.9439	37.4	1.64947	9.35619	0.145363
2012	341500	4490662	6680400	792148	899345	716065	385950	3530765	1584619	422572	2510920	369687000	2973000	125949600	14507000	20464.7	186850	12.4738	38.9	1.36163	9.46707	0.145363
2013	341500	4441265	7064600	784827	897011	719287	584940	3724479	1624802	491157	2860000	370462000	3305000	133269600	15106000	20877.5	196170	13.323	40.2	1.50241	9.5536	0.145363
2014	341500	4631198	7363100	775922	905961	730615	585750	3921081	1727563	508635	3216049	354409000	3080000	121441200	14993000	24119.8	223200	14.6907	41.4	1.71832	9.62964	0.145363
2015	341500	3279853	5395300	766852	665573	508362	588720	3232589	1447479	626626	3623056	365293000	2764000	68013600	5874000	21292.9	149640	12.1346	42.81	1.54929	9.55836	0.145363
2016	341500	3141887	5589300	759012	674146	515693	429510	3549258	1504357	596282	3419656	191109000	3083000	65305200	5544000	22006.9	197210	13.8495	43.99	1.46835	9.84576	0.145363
2017	341500	3158471	5636200	753645	667834	510193	439870	3670605	1605550	658516	3753587	182018000	3088000	65049600	5174000	25161.3	205990	16.1375	45.41	1.82445	9.8967	0.145363
2018	341500	3478456	5849000	754184	727658	610323	434120	3690223	1670208	733845	4129795	174433000	3060000	65085600	5000000	23490.6	216270	14.2189	46.08	1.6827	9.9928	0.145363
2019	341500	3471330	5972200	753972	729463	607615	437440	4093997	1820468	909595	4739907	166294000	2415000	57244800	4901000	24513.9	227180	15.5206	47.09	1.88521	10.2187	0.145363
2020	341500	3456750	6164000	753291	733919	609061	437620	4537506	1993965	1005207	5053908	162547000	1915000	58569600	4740000	24233.8	277060	15.2942	48.49	1.61325	10.255	0.145363
2021	341500	3550786	6310800	753919	743457	611328	438180	4847663	2280359	936285	4846925	160047000	1415000	59894400	4578100	25548.6	369880	15.8026	49.46	1.8204	10.4021	0.145363
2022	341500	3.56099e+06	6477900	760413	745851	611992	435960	5110365	2406588	985775	5283131	157737000	915000	61219200	4468000	26636.5	610950	16.1642	50.5	1.90959	10.4473	0.145363
2023	341500	3.62237e+06	6612900	765529	726932	611527	433740	5223425	2608477	1038630	6088838	156217000	415000	62544000	4.3579e+06	26084.8	717420	16.1343	51.41	1.85861	10.4998	0.145363
2008	341600	4149209	6226700	864191	1012061	814682	459540	2110088	1313159	57762	609322	3.18003e+08	3379000	99292800	7824000	18862.4	8270	11.498	31.4	1.35709	8.83426	0.145363
2009	341600	4480201	6503500	864006	1017034	843933	449240	2165835	1431037	111637	801010	3.18975e+08	3379000	97350000	8035000	15779.5	133570	9.81203	33.1	1.07845	8.8868	0.145363
2010	341600	4619926	6835600	863080	1035199	854060	446780	2414062	1609445	128961	1033412	3.15047e+08	3106000	94065600	7850000	18928.5	152910	11.6961	29.1	1.36428	9.05199	0.145363
2011	341600	4695170	7268700	859655	1050543	863123	289585	2878283	1875132	175738	1386189	2.66067e+08	270000	115418400	7153000	18024	142890	10.1185	31.3	1.39711	9.24683	0.145363
2012	341600	4425784	7606700	855115	1048022	850684	293372	3177780	2107701	226652	1772645	2.6973e+08	502000	113389200	7200000	17350.5	165700	10.2163	33	1.23699	9.36583	0.145363
2013	341600	4474468	7967500	849574	1055338	854172	297271	3437587	2236870	277049	2064319	2.73393e+08	734000	111360000	7247000	22866.6	173630	14.9842	34.4	1.71712	9.43345	0.145363
2014	341600	4674866	8392200	844141	1083064	878548	299576	3617540	2351492	300797	2292171	2.77055e+08	966000	109330800	7294000	22489.7	173840	13.3176	35.7	1.56697	9.5417	0.145363
2015	341600	4852044	8669000	839926	1093708	885577	301445	3665824	2342890	393482	2778388	2.80718e+08	1198000	107301600	7341000	20521	194580	12.4353	36.96	1.40599	9.60545	0.145363
2016	341600	4739255	9854900	835521	1085880	890286	304213	3920552	2456906	417317	2785781	2.84381e+08	1430000	105272400	7388000	25327	138190	15.6255	38.28	1.73611	9.69082	0.145363
2017	341600	4834040	7580200	830596	1097483	900079	306327	3995678	2520724	409491	3250253	2.88044e+08	1662000	103243200	7435000	20014.5	225300	11.344	39.77	1.53904	9.77917	0.145363
2018	341600	4878428	7805100	827346	1018209	875477	312645	3843130	2697193	412373	3436073	2.91707e+08	1894000	101214000	7482000	21442.1	252270	12.984	41.01	1.47919	9.87508	0.145363
2019	341600	4997059	7952500	824290	1025510	871868	318608	4296525	2939714	383332	3733929	2.9537e+08	2126000	99184800	7529000	23599.7	248640	14.5192	42.22	1.81379	10.1804	0.145363
2020	341600	5051884	8131400	822193	1030294	872820	3900	4724260	3039044	547380	3909623	2.99033e+08	2358000	97155600	7576000	26910.3	291850	16.1557	42.5	1.94291	10.2079	0.145363
2021	341600	5146158	8300500	822223	1.02927e+06	875285	114620	4977559	3165897	574387	3774011	3.02695e+08	2590000	95126400	7623000	28243.6	374290	16.2678	43.2	2.01987	10.2919	0.145363
2022	341600	5.1659e+06	8443400	823579	1.02951e+06	875482	225340	5294880	3316601	609632	3971840	3.06358e+08	2822000	93097200	7670000	28632.2	616240	18.7744	44.05	1.90599	10.3522	0.145363
2023	341600	5.18172e+06	8511500	824423	1.02945e+06	875944	336060	5310615	3318356	615285	4129247	3.10021e+08	3054000	91068000	7717000	28836.4	620490	16.6093	45.95	2.06226	10.4029	0.145363
2008	341700	659094	913900	217484	188441	111769	83430	643275	285111	43876	428349	55657000	275000	22532400	6346000	16419	2010	9.78047	40.5	1.21354	9.40145	0.145363
2009	341700	678897	986300	216431	194267	114749	83430	668794	302590	75000	547496	56806000	272000	21483600	5893000	19788.9	4830	13.0158	42	1.36987	9.63958	0.145363
2010	341700	680514	1039500	215505	198363	116594	83470	766474	363580	86092	681120	58440000	298000	21174000	6178000	18401.2	27430	10.5822	44.5	1.36989	9.83889	0.145363
2011	341700	694496	1098300	214209	199978	114123	74280	942238	436539	114576	881080	60039000	281000	23601600	6079000	20304.6	36000	13.1819	46	1.43186	10.0467	0.145363
2012	341700	657553	1145300	212512	202271	115434	84640	1037713	475507	128305	1127224	59149000	272000	23065200	5742000	19017.9	49150	10.66	47.5	1.38014	10.1575	0.145363
2013	341700	652167	1203100	210402	201948	115896	95000	1123905	504957	145080	1306761	62714000	289000	24228000	5691000	19242.6	61100	11.0972	48.8	1.38421	10.2595	0.145363
2014	341700	679879	1233300	208200	203610	117375	95000	1192701	537694	137129	1384950	7.86721e+07	268000	25618800	5585000	18889.8	62850	12.0058	50.1	1.2754	10.3798	0.145363
2015	341700	705238	1253700	205731	200346	118666	105680	1253357	502076	169279	1475708	60021000	253000	26086800	5528000	23863	61220	14.898	51.11	1.77805	10.4255	0.145363
2016	341700	675942	1295800	203617	193181	119430	106790	1270572	473669	180995	1489985	59902000	285000	28148400	5412000	24952	71600	14.773	52.3	1.88105	10.5012	0.145363
2017	341700	687771	1279600	201475	183694	119290	110740	1307172	478283	189597	1436093	59664000	313000	29514000	4968000	23474.1	71520	13.6481	53.67	1.75534	10.5595	0.145363
2018	341700	647932	1347600	200286	165363	117979	110770	1328328	529184	207435	1544335	56898000	293000	28864800	4749000	26507.9	84660	17.4535	54.1	1.9218	10.6521	0.145363
2019	341700	648128	1401000	199661	164606	117590	111490	1464631	572312	217477	1646024	54244000	293000	27903600	4471000	27933.6	98840	17.4315	54.92	2.15237	10.8466	0.145363
2020	341700	632533	1418000	199997	163174	118610	111440	1547983	593062	247909	1781087	53032000	290000	27846000	4027000	27124	109020	16.7905	59.68	1.99519	10.8932	0.145363
2021	341700	654533	1439300	201019	167885	120862	111390	1646683	624585	267832	1729395	51725000	297000	27394800	1554000	28993.5	124590	16.3279	60.1	2.04654	11.0407	0.145363
2022	341700	665068	1477500	204623	169380	120885	111340	1728963	655970	295831	2018003	51099000	293000	27214800	1490000	29018.8	138950	17.1199	60.23	2.20625	11.119	0.145363
2023	341700	672656	1519700	207774	173992	121212	111290	1716935	641737	341752	2249200	6.48874e+07	289000	27034800	1426000	29602.1	171050	16.6706	61.39	2.0895	11.1525	0.145363
2008	341800	1294085	1872400	393948	341634	218003	146120	1245832	500493	75111	686049	120436000	1098000	13069200	4389000	18659.8	1720	12.2628	17.9	1.27697	9.6073	0.145363
2009	341800	1336750	1976700	386908	353480	223624	147100	1311615	546390	116861	857716	128797000	1128000	14467200	4417000	21027.4	43110	13.0586	43.2	1.45882	9.65375	0.145363
2010	341800	1344871	2074300	377459	354361	226755	148090	1484220	707694	125181	1040079	138312000	1273000	16039200	4521000	19025.5	48580	12.4106	43.3	1.29124	9.84616	0.145363
2011	341800	1378312	2144200	366995	357006	230159	98780	1710392	821921	204079	1421828	142495000	1374000	17139600	4561000	19822.3	51650	12.6124	45	1.42306	10.0871	0.145363
2012	341800	1303746	2238500	358598	355118	230140	149750	1870207	913749	240836	1783681	139889000	1481000	18054000	4448000	20781.4	67890	11.6614	46.7	1.43447	10.207	0.145363
2013	341800	1277671	2320700	351714	354789	231022	200720	2030948	977527	260674	2051803	142596000	1513000	15988800	4248000	23602.7	72040	13.3067	48.1	1.7352	10.3116	0.145363
2014	341800	1329670	2399900	345250	355805	232291	200720	2135882	1023939	267612	2225784	130620000	1886000	15885600	3912000	20685.1	70640	13.4859	49.3	1.44735	10.3981	0.145363
2015	341800	1375341	2459900	338878	353235	232445	200660	2212384	1038653	305455	2432059	132300000	1820000	16105200	4004000	22903.2	79210	14.2341	50.64	1.62636	10.4545	0.145363
2016	341800	1315826	2515200	337112	349424	234371	200660	2360005	1077324	341208	2547727	126900000	1662000	16711200	3766000	21409.2	90270	13.5394	52.14	1.4372	10.5395	0.145363
2017	341800	1332293	2298100	339813	342058	231150	201990	2440457	1125553	232594	2733264	122989000	1714000	15936000	3536000	23246.6	82500	14.8578	53.69	1.57965	10.6535	0.145363
2018	341800	1291415	2343500	345653	279198	218451	202500	2398899	1059524	194463	2893598	115285000	2343000	14234400	3282000	23710.6	89220	15.2419	55.21	1.8046	10.7624	0.145363
2019	341800	1291049	2403300	348195	280333	217719	204770	2617849	1142656	240003	3256389	110180000	1681000	15158400	3132000	24910.3	87060	16.3861	56.33	1.82034	10.9322	0.145363
2020	341800	1266761	2445800	350359	281935	218051	204770	2848151	1215214	412025	3248085	110180000	1624000	15700800	2909000	27483.8	119200	17.1698	60.82	1.90028	10.9666	0.145363
2021	341800	1287207	2512500	355645	286084	220005	216840	3018819	1271800	495088	3150993	105989000	1608000	14923200	2783000	27359.1	126490	15.6554	61.75	1.98302	11.1042	0.145363
2022	341800	1.2678e+06	2560300	365927	286339	219354	190300	3176904	1312161	521385	3485443	104329000	1592000	14145600	2657000	24628.9	172700	14.2674	62.6	1.79866	11.1469	0.145363
2023	341800	1.28457e+06	2607300	371954	286357	219896	163760	3184727	1255857	544138	3684305	103732000	1576000	13368000	2531000	27933.3	218900	15.984	63.55	2.02464	11.1671	0.145363
2008	350100	637721	1550177	129022	260431	121940	118017	4023100	986783	84192	1781952	86578000	2281000	267115200	8144000	27405.2	9010	17.0493	57.5	1.92468	10.489	0.192249
2009	350100	619245	1607019	128158	260734	118690	116693	4108800	1059683	113531	2050925	87337000	2329000	272883600	8488000	29112.2	10490	17.6866	59	1.93626	10.6169	0.192249
2010	350100	606917	1328325	126264	261686	115990	115370	4800100	1245849	147086	2624208	85872000	2239000	280746000	8509000	31216	12910	18.4865	61.95	2.40671	10.7864	0.192249
2011	350100	599800	1346272	124189	262553	113170	114047	5526000	1372681	291350	3633008	87840000	2387000	290746800	8391000	30150.4	22420	17.5882	63.3	2.15336	10.9602	0.192249
2012	350100	559950	1376763	120537	260727	106880	112724	6251200	1524015	298982	4107344	87349000	2507000	292663200	8272000	32074.9	25730	20.0384	64.79	2.37359	11.0724	0.192249
2013	350100	555279	1400091	116009	263152	105120	128661	6827500	1638180	379070	5338424	87997000	2688000	295606800	8297000	31784.6	29070	18.9099	65.94	2.44441	11.1757	0.192249
2014	350100	553738	1429751	110359	266454	103680	125811	7307700	1848067	361467	5748081	90465000	2848000	297885600	8628000	34747.2	46420	22.5086	66.94	2.60368	11.2462	0.192249
2015	350100	462900	1453959	105696	246160	86650	116750	6726900	1987472	602675	7259345	91744000	2938000	294940800	8202000	33388	48720	20.8198	67.65	2.30496	11.3244	0.192249
2016	350100	444274	1457360	103570	238798	83250	112892	7497600	2213046	621048	8299274	93200000	2977000	296642400	8398000	38727.6	30380	23.3511	68.53	2.72142	11.4099	0.192249
2017	350100	447203	1198094	103201	240760	82530	111201	8187900	2.49483e+06	914002	9388572	88478000	3083000	272766000	7894000	34971.7	41450	19.453	69.5	2.47537	11.5269	0.192249
2018	350100	459428	1162935	103748	247215	83330	111616	8767800	2.70175e+06	749954	9247552	84729000	3132000	270909600	7334000	40167.9	55830	25.7477	70.33	2.94524	11.6241	0.192249
2019	350100	468813	1.11667e+06	105846	255873	84300	111772	9349200	2.87762e+06	650620	9497604	81351000	3137000	270367200	5587000	42131.1	79210	25.1229	70.5	3.255	11.7927	0.192249
2020	350100	485445	1.13128e+06	108652	262782	86250	116902	10008000	2.94703e+06	618302	9514035	78416000	3187000	265479600	4859000	37524.4	110930	21.8677	72.5	2.75042	11.8483	0.192249
2021	350100	489842	1.10719e+06	110103	268441	86330	87074.9	11222100	3.07528e+06	618053	9252559	75031000	3197000	269680800	4659000	40138.9	147970	26.2531	73	2.97484	11.9616	0.192249
2022	350100	493636	1.11827e+06	112736	275173	86680	88087.3	11947500	3.32741e+06	575682	10060892	72810000	3179000	267188400	4499000	40063.8	158490	25.6449	73.27	3.07942	12.0367	0.192249
2023	350100	496260	1.11756e+06	115708	280540	87300	86923.8	12352800	3.52687e+06	571440	10049040	71162000	3141000	262614000	4257000	40981.3	148440	26.8041	73.91	3.03728	12.0774	0.192249
2008	350200	43444	1051700	35307.9	28430	7870	33954.3	348600	126849	70631	2380896	23790000	580000	8926800	839000	27024	1890	15.6793	81.2	2.0093	11.4056	0.192249
2009	350200	44837	1125732	34530	28720	8290	32241.8	332600	132010	88882	2680527	22859000	552000	8215200	530000	30029.6	2910	17.4487	81.6	2.00676	11.4942	0.192249
2010	350200	43018	1195492	33046.5	29180	7940	30529.3	375300	155848	95989	3069468	22920000	602000	8456400	517000	32151.7	1560	21.2775	88.33	2.43842	11.6467	0.192249
2011	350200	42007	1275000	31379.5	28670	7630	28816.7	401400	173014	115482	3890726	23041000	632000	8262000	511000	30301.2	1520	18.2601	88.5	2.19282	11.828	0.192249
2012	350200	40588	1358457	28982.9	27790	7340	27104.2	412900	186507	138284	4626929	23901000	742000	4790400	511000	31438.3	1650	18.5906	88.6	2.29155	11.902	0.192249
2013	350200	38819	1400091	26000.1	27190	6960	28835.5	423800	190752	143031	5167402	23499000	736000	4670400	506000	35372.2	2340	21.4964	88.74	2.49222	11.9406	0.192249
2014	350200	38552	1429751	22830.4	26420	6890	26027	443100	198032	148248	5488468	13932000	727000	4411200	391000	31494.3	2760	19.5002	88.8	2.38778	11.9888	0.192249
2015	350200	37886	1453959	20411.6	26160	6690	22546.3	449400	204416	235501	6511705	14459000	685000	3913200	425000	37737.8	2700	21.554	88.89	2.67771	12.0085	0.192249
2016	350200	35272	1315799	18899.7	25910	6580	20600.8	437000	194256	211347	7586381	13124000	586000	3530400	417000	36950.2	1910	21.9408	89.01	2.53347	12.0508	0.192249
2017	350200	24430	1212444	17761.1	21370	4190	19137.9	438500	205025	228758	7970976	12377000	585000	3487200	368000	34488.4	3250	20.2798	89.1	2.35379	12.1315	0.192249
2018	350200	22929	1244494	16833.8	21600	4020	18110.6	472400	225995	218440	8924985	11646000	583000	3729600	349000	36333.3	4970	23.0699	89.1	2.68231	12.1919	0.192249
2019	350200	24332	1279542	16157.6	22100	4010	17062.2	574000	262062	235384	9129770	10978000	570000	2942400	329000	38536.6	6230	24.4773	89.2	2.86458	12.3445	0.192249
2020	350200	25066	1.32038e+06	15913.8	22510	4090	17122.1	610300	278801	251237	9769054	10694000	556000	2886000	319000	41704.6	13140	25.0942	89.41	3.18383	12.3661	0.192249
2021	350200	25443	1.33633e+06	15838.8	22010	4100	12526.1	620100	292544	227726	10600014	10389000	541000	2857200	310000	42080.3	16530	24.7626	90.1	3.17867	12.4234	0.192249
2022	350200	25739	1.3523e+06	16167.2	21540	4140	12632.4	621900	306110	264671	10887431	10025000	522000	2622000	296000	43952.3	19100	27.9863	90.19	3.37461	12.4924	0.192249
2023	350200	26035	1374223	16471.7	20600	4130	12374.1	593500	307581	213666	10846541	9526000	501000	2266800	284000	42963.5	28060	25.2824	90.81	3.24538	12.4906	0.192249
2008	350300	303447	743600	68800.2	105320	53380	62116	1189300	347700	38391	455274	65200000	2376000	56466000	5692000	28971.2	9730	16.1197	46.3	2.1927	9.86597	0.192249
2009	350300	310295	748322	68179.9	107950	55290	61800.1	1184400	360500	67510	625898	66812000	2422000	56484000	5745000	28238.4	9810	17.3504	47.2	2.18736	9.98199	0.192249
2010	350300	306167	749600	67481.1	109080	54890	61484.2	1331600	406000	68208	793185	66666000	2468000	56502000	5798000	30397.3	6310	19.8325	50.78	2.22827	10.1766	0.192249
2011	350300	301246	762706	66608.2	107950	52960	61168.3	1472300	425900	98168	954086	64919000	2514000	56520000	5851000	29701.6	10490	18.7443	50.9	2.1052	10.379	0.192249
2012	350300	284659	780018	65070.4	105350	50010	60852.4	1573500	444100	116655	1177859	63840000	2560000	56538000	5904000	31899.9	13190	20.3879	51.8	2.26985	10.5058	0.192249
2013	350300	281538	790251	62911.3	106530	49270	69772.1	1648300	455100	158416	1441627	61781000	2567000	57076800	5662000	34174.3	14390	20.8806	53.6	2.40236	10.6012	0.192249
2014	350300	277653	795568	60568.1	106100	48290	69048.5	1692800	471000	157533	1579085	62186000	2562000	57480000	3955000	35981.2	20030	20.441	55.3	2.69345	10.6925	0.192249
2015	350300	271429	801123	58512.8	108780	47320	64632.1	1755200	477100	198621	1887983	64382000	2576000	57973200	3798000	31960.1	25730	19.0656	56.58	2.12912	10.7806	0.192249
2016	350300	258358	717678	57176.7	106980	46140	62323.2	1926400	471000	181249	2069116	62338000	2559000	58473600	3812000	34996.4	18680	20.2973	58.1	2.58535	10.8609	0.192249
2017	350300	254900	678649	56302	86455	44480	60666.5	2058900	467800	208829	2281087	58885000	2462000	57825600	3564000	39574.2	20500	24.2419	59.6	2.6769	10.9555	0.192249
2018	350300	182605	657533	56003.8	65930	30210	60251.5	2171000	509500	183620	2279854	54111000	2325000	58056000	3140000	37975.8	22280	22.0491	61.01	2.85189	11.0395	0.192249
2019	350300	182997	653140	56079.3	65840	30110	59218.8	2318500	547100	253290	2358640	48341000	2298000	56955600	2716000	40709.7	13340	24.3253	61.7	2.84707	11.1745	0.192249
2020	350300	185286	662660	56419.4	67640	30430	60703.4	2374100	565300	216853	2562741	45432000	1849000	55366800	2524000	40011.3	14180	24.3084	62.7	3.0826	11.1891	0.192249
2021	350300	186404	667305	56735.9	67800	30510	44869.5	2568000	580600	166850	2472677	44180000	1343000	54648000	2423000	38036.8	13160	23.036	63.5	2.81342	11.2716	0.192249
2022	350300	187731	672270	58422.2	68950	30780	45648.7	2739400	624300	199744	2769364	42990300	1310000	53738400	2338620	40467.3	18240	25.0322	64.01	3.0858	11.3493	0.192249
2023	350300	189522	687270	60257	70290	30910	45267.1	2817500	648100	184987	2663182	41806310	1277000	52828800	2.25424e+06	38835.2	23030	23.5195	65.04	2.87247	11.3329	0.192249
2008	350400	1063200	1051700	155266	401700	198112	135077	2212100	1141526	66854	530180	125871000	9234000	26565600	5742000	26641.8	12500	14.8427	43.31	1.92282	10.114	0.192249
2009	350400	1034600	1125732	155633	405580	190562	137295	2332200	1225662	108278	751466	127106000	9207000	27560400	5717000	31096.4	18360	20.5046	44.4	2.39728	10.2929	0.192249
2010	350400	991500	1195492	154356	406700	183652	139513	2691700	1408004	155478	970095	129743000	9215000	28321200	5756000	32229.9	48010	19.7093	51.12	2.1854	10.4844	0.192249
2011	350400	980100	1275000	154335	416090	179263	141730	3131600	1570142	213662	1208542	130633000	9297000	29019600	5783000	30328.7	50010	19.5657	51.5	2.26536	10.6993	0.192249
2012	350400	937900	1358457	153926	417950	169365	143948	3379200	1682649	261737	1532235	131508000	9455000	29798400	5735200	34638.6	62070	22.8053	52.1	2.57308	10.7964	0.192249
2013	350400	927100	1500454	151795	430210	165736	168349	3683100	1789596	341429	1873622	132270000	9590000	30568800	5682000	31959.4	73260	19.8987	53.63	2.12983	10.8791	0.192249
2014	350400	919200	1600102	148681	437210	162221	169498	3997500	1950456	378559	1988757	134109000	9865000	31440000	5653000	35179.2	75550	22.2836	55.1	2.57755	10.9523	0.192249
2015	350400	893800	1650010	150726	447350	159793	166490	4149000	2050406	454280	2406724	135241000	9934000	31551600	5720000	35353.1	82720	21.8261	56.27	2.41443	11.007	0.192249
2016	350400	865400	1315799	158606	454780	154030	172882	4051000	2277408	425372	2538020	136750000	10000000	31665600	5574000	33958.5	108060	19.7382	57.5	2.31929	11.0796	0.192249
2017	350400	899900	1450253	167264	373950	158132	180230	4216000	2365952	448711	2909650	129248000	9990000	31917600	5245000	38738.7	109680	24.7379	59.04	2.89337	11.2005	0.192249
2018	350400	933700	1468591	172519	293120	159586	185604	4604500	2587919	463036	2970992	124830000	9748000	31698000	5003000	36607.7	116390	20.4021	60.23	2.43429	11.3077	0.192249
2019	350400	930900	1481269	173507	299470	158979	183221	5130400	2769994	477811	3165751	121587000	9836000	31809600	4847000	37692.4	111440	23.21	60.9	2.72716	11.4079	0.192249
2020	350400	945300	1503296	173281	303440	161347	186438	5344900	2841740	505873	3344425	118532000	4798000	31827600	4710000	36580.5	117750	23.8827	63.2	2.55795	11.4491	0.192249
2021	350400	952100	1532341	173093	309200	161394	136890	5501400	2992126	389831	3118997	116028000	4759000	32049600	4600000	38372.8	133210	23.2908	63.7	2.92282	11.5414	0.192249
2022	350400	953900	1.56073e+06	182460	318280	161614	142566	5731900	3239784	446145	3495690	113419000	4685000	32257200	4483000	38000.7	166670	23.8966	64.4	2.63273	11.5967	0.192249
2023	350400	958800	1.58881e+06	191694	327130	162148	144007	6006100	3471487	481351	3614366	111025000	4611000	32464800	4366000	39178.2	194890	23.7796	65.9	2.98417	11.5655	0.192249
2008	350500	746908	1051700	134840	252330	160070	120513	2.08955e+06	666630	127236	1613540	160007000	1211000	95048400	6.0709e+06	27052.1	5070	15.8487	50.21	2.05091	10.5946	0.192249
2009	350500	730315	1125732	131954	257770	163790	117622	2.01757e+06	698024	183740	1869038	156012000	1224000	94495200	5.87545e+06	27421.4	3790	18.2447	52.3	1.84932	10.7163	0.192249
2010	350500	686075	1195492	126806	255580	159870	114732	2.27001e+06	805399	211417	2296427	152017000	1237000	93942000	5680000	29879.6	4660	18.5055	58.43	1.99289	10.8594	0.192249
2011	350500	651455	1275000	121788	251350	154200	111841	2.60556e+06	902229	301714	2969907	148022000	1250000	93388800	5484550	31351.4	22270	19.3907	59.3	2.30407	11.034	0.192249
2012	350500	590677	1358457	116503	244150	146840	108951	2735037	979392	403807	3564437	148840000	1276000	91675200	5511000	34697.5	24120	20.7977	60.4	2.49603	11.13	0.192249
2013	350500	567714	1400091	110857	245190	145360	122947	2.87093e+06	1.04997e+06	469320	4222149	147771000	1297000	88882800	5516000	30500	28180	20.1131	61.6	2.34747	11.2141	0.192249
2014	350500	539533	1429751	104222	245740	143690	118815	2.95593e+06	1.13746e+06	483359	4767231	150628000	1327000	87417600	5341000	35515.3	35790	21.5143	62.9	2.39912	11.2904	0.192249
2015	350500	507085	1453959	99334.1	256580	141030	109723	3.05675e+06	1.18421e+06	627848	5398893	152381000	1637000	86283600	5239000	34731.4	34130	20.2489	63.56	2.53339	11.3499	0.192249
2016	350500	462100	1315799	97197.2	254180	137100	105946	3.40804e+06	1.30832e+06	578454	5976651	157185000	2448000	78276000	5480000	38086.2	32310	22.8273	64.5	2.81708	11.4192	0.192249
2017	350500	475314	1212444	96237.4	203995	136000	103698	3.48436e+06	1.317e+06	602470	6378085	145070000	2464000	77156400	5156000	37602.4	34740	23.7378	65.69	2.80794	11.5313	0.192249
2018	350500	485034	1244494	96315.2	153810	85410	103620	3.64233e+06	1.42782e+06	630790	6323844	136010000	2457000	76585200	4792000	34547.4	35760	21.7127	66.6	2.58271	11.6277	0.192249
2019	350500	489759	1279542	95900.1	159680	85870	101269	3947459	1542566	653081	6582451	128779000	2154000	74980800	4506000	35738.6	36190	19.9476	67.2	2.48119	11.7807	0.192249
2020	350500	498320	1.32038e+06	96124	163290	86890	103423	4114219	1582126	670427	7151369	122244000	2046000	74634000	4315000	36417.6	39040	20.596	68.5	2.65727	11.7953	0.192249
2021	350500	504236	1.33633e+06	96689.9	165190	86950	76467.2	4227317	1643146	495414	6701520	116415000	2082000	78052800	4163000	39193.6	45700	22.0024	69.7	2.77317	11.8956	0.192249
2022	350500	508403	1.3523e+06	100029	167520	87580	78158.6	4540328	1776680	620827	8074508	112084000	1987000	76921200	4003000	42464.8	52280	25.2089	70.04	2.88803	11.96	0.192249
2023	350500	511165	1374223	103542	169240	87690	77784.2	4742000	1.87703e+06	615902	8502650	106714000	1892000	75789600	3843000	40016.2	66500	22.4642	70.79	2.83137	11.9622	0.192249
2008	350600	643457	1904600	125385	251850	111980	124007	3711400	1.62853e+06	60821	922578	370600000	2600000	401400000	11500000	27397.1	4210	16.179	41.99	2.03179	9.97057	0.192249
2009	350600	685571	1918800	126538	254740	117740	121276	3763000	1.71553e+06	141163	1207303	385500000	2600000	404040000	11800000	31086.1	5480	19.3539	43.3	2.0649	10.1254	0.192249
2010	350600	700788	1969200	126941	258520	119150	118545	4323200	1.9996e+06	160568	1475168	387300000	2900000	408480000	12000000	31669.7	20210	20.7212	46.73	2.3279	10.3101	0.192249
2011	350600	705470	2036900	126114	257230	117790	115814	4985400	2.21393e+06	246671	1824288	392100000	3000000	411840000	12000000	33232.3	13330	18.4818	47.9	2.35874	10.5159	0.192249
2012	350600	702575	2073100	120921	258390	117170	113083	5327300	2.36319e+06	296413	2217738	391200000	3100000	415080000	11700000	29256.7	30940	16.8397	52	2.03931	10.6411	0.192249
2013	350600	692711	2133600	114718	260030	116140	127228	5681700	2.51171e+06	422075	2622539	390000000	3300000	416974800	11866000	33293.6	38510	19.6981	53	2.40966	10.7294	0.192249
2014	350600	691260	2132600	109637	263680	114460	124988	6027100	2.77709e+06	366403	2745041	406300000	3323000	419239200	11737000	33901	40770	22.2706	53.8	2.41198	10.8275	0.192249
2015	350600	691493	2138200	107446	266730	113130	118683	6316400	2.89159e+06	524610	3558161	405300000	3437000	425234400	11561000	37801.6	43540	24.6822	54.76	2.64644	10.9172	0.192249
2016	350600	671529	1864800	108254	264720	109770	117998	7083800	3.13816e+06	487446	3691462	402500000	3322000	429038400	10923000	34346.9	38070	20.2445	56.2	2.55834	11.0272	0.192249
2017	350600	680100	1878000	111023	217660	108000	119629	7299500	3.17728e+06	432268	4291903	375500000	3600000	437690400	10326000	36424.9	41480	20.346	57.7	2.72464	11.139	0.192249
2018	350600	412882	1869500	114723	170600	62080	123424	8018700	3.455e+06	405238	4298509	355300000	3588000	423145200	9787000	38671.2	56970	25.4356	59	2.83128	11.2355	0.192249
2019	350600	408181	1904500	116326	172360	60620	122838	8822000	3.74587e+06	430439	4404412	340800000	3407000	413418000	9443000	41125.5	60910	26.4204	60	2.84539	11.4169	0.192249
2020	350600	412467	1928300	117947	175100	61440	126903	9197500	3.81801e+06	431694	4451211	312000000	3420000	385272000	9000000	42315.6	70110	24.7344	61.4	3.14451	11.3709	0.192249
2021	350600	417551	1943300	119867	176800	61540	94797	9925700	4.02336e+06	252807	4214965	292200000	3507000	373593600	8600000	37411.8	93210	23.0505	62.9	2.73592	11.4672	0.192249
2022	350600	420144	1987000	124981	179410	61880	97655.3	10663500	4.40007e+06	356859	5018618	265300000	3544000	344905200	7993000	40283.2	111250	25.7194	63.34	2.71854	11.5926	0.192249
2023	350600	421150	2007100	129253	181750	62030	97099.4	11178800	4.65329e+06	382498	5219874	255200000	3581000	316216800	7386000	38197	146870	23.5343	64.2	2.79334	11.5892	0.192249
2008	350700	1285300	1408800	208780	415880	243860	183116	2134000	908200	66956	557180	156800000	3313000	45465600	7528000	26019.8	11770	14.6633	46.3	1.91185	9.80623	0.192249
2009	350700	1344700	1499479	207424	426230	250360	185776	2205100	967600	92425	702391	157000000	3572000	44994000	7891000	26794.1	30640	15.9265	48.5	1.80698	9.90583	0.192249
2010	350700	1262100	1612668	206950	424850	251120	188436	2488000	1092500	131336	870249	158600000	3831000	44522400	8254000	28024.3	32520	17.4206	50.74	1.99682	10.0525	0.192249
2011	350700	1252300	1738595	208092	427710	249570	191097	3303600	1435800	171366	1163218	155600000	4090000	44050800	8617000	28779.9	49020	18.7592	51.1	2.09896	10.2589	0.192249
2012	350700	1213800	1896879	207187	429940	248120	193757	3585900	1548800	193648	1311031	156700000	4236000	46153200	8686000	32190.3	54360	20.8275	51.6	2.21184	10.3658	0.192249
2013	350700	1201400	2079746	206308	436070	249280	228807	3894700	1618700	319455	1781228	157000000	4498000	47536800	8796000	34281.5	64710	21.2794	52.6	2.34158	10.4629	0.192249
2014	350700	1171600	2185847	201757	436020	248610	230006	4204800	1726500	378075	1903858	160300000	4565000	45332400	9354000	31271	70860	19.901	53.4	2.28502	10.5614	0.192249
2015	350700	1130400	2285525	199177	437270	249100	220007	4503900	1736500	480653	2399707	161600000	4626000	40584000	9304000	38134.2	76310	22.1725	53.98	2.9113	10.6425	0.192249
2016	350700	1109300	2320661	199949	436590	247350	217947	5037400	1850500	440082	2498214	159300000	4616000	43509600	9321000	38814.9	82920	21.9646	54.8	2.81924	10.7235	0.192249
2017	350700	1148300	2178678	204024	366390	252000	219840	4944400	1825000	481513	2836435	151200000	4518000	28471200	8845000	35747	84720	21.527	55.79	2.43674	10.8385	0.192249
2018	350700	1199300	2275392	208408	296190	192230	224215	5140200	1966300	477669	2964198	145300000	4477000	29374800	8498000	38311.5	92220	24.5406	56.7	2.78906	10.9334	0.192249
2019	350700	1157800	2301291	211445	293780	184160	223283	5589000	2084400	474508	3104115	140800000	4518000	30007200	8160000	40098.5	108460	22.556	57.5	2.7442	11.0452	0.192249
2020	350700	1178200	2359067	214979	300370	187310	231303	5871400	2137600	525774	3335636	136700000	4469000	30307200	7895000	42145.6	130100	25.9067	59.65	3.00974	11.0574	0.192249
2021	350700	1183000	2381977	219525	303670	187330	173611	6155900	2263400	438428	3086064	132800000	4471000	30424800	7660000	42731.5	146900	24.487	60	3.27219	11.116	0.192249
2022	350700	1184900	2467540	234875	308960	187450	183522	6409000	2479800	540498	3443093	129200000	4697000	30867600	7287000	38443.8	156780	21.278	60.84	2.59844	11.1626	0.192249
2023	350700	1188200	2536351	248709	314010	187960	186839	6753200	2681600	557958	3663028	125600000	4923000	31218000	7027000	43628.3	192790	25.0009	62.28	3.34087	11.1912	0.192249
2008	350800	878400	960138	137904	285500	167160	121521	1939600	679970	70380	682233	113300000	3.08737e+06	14709600	6068000	30149	13690	19.4384	40.51	2.31955	10.0475	0.192249
2009	350800	879500	1008718	137877	292270	171920	122803	1896700	707794	93916	890415	114800000	3.23742e+06	14968800	6162000	30501.6	38360	16.9357	42.3	2.17032	10.2442	0.192249
2010	350800	877700	1042859	136794	296990	176000	124084	2123100	818056	130288	1108134	113100000	3.38747e+06	15440400	6148000	31086.8	41740	19.1127	45.02	2.26819	10.3584	0.192249
2011	350800	903100	1086771	136515	301930	179440	125366	2528600	913230	164937	1377312	113500000	3.53752e+06	15706800	6120000	29929	51640	19.0337	47.5	2.28439	10.6476	0.192249
2012	350800	893700	1101473	135426	304650	180880	126647	2657900	1.00681e+06	200413	1649299	111500000	3.68758e+06	15612000	6025000	33097.4	66960	21.7703	49.4	2.36473	10.7402	0.192249
2013	350800	887400	1154496	133715	308280	182280	148298	2906300	1.1204e+06	303315	1994163	111000000	3.87121e+06	15632400	5918000	35218.1	79130	22.3714	50.89	2.32503	10.7977	0.192249
2014	350800	876900	1.19059e+06	130712	311270	182810	149013	3138400	1.23734e+06	298737	2060037	113100000	4.0053e+06	15088800	5680000	32399.8	91010	20.1122	51.6	2.36923	10.8741	0.192249
2015	350800	851200	1177340	129520	311780	182550	143065	3375300	1.27286e+06	450883	2579654	115900000	4.15053e+06	15211200	5610000	36675.3	98810	21.9414	52.57	2.74648	10.9365	0.192249
2016	350800	822900	987215	132359	312800	182110	144272	3738800	1.37823e+06	401614	2742714	116900000	4.30614e+06	15223200	5635000	33335	99450	19.0135	53.8	2.38863	11.0083	0.192249
2017	350800	819300	930571	136368	260485	178000	146939	3954600	1.45483e+06	436297	2998149	110800000	4.40193e+06	14752800	5292000	36268.9	116910	20.9982	55.7	2.70333	11.1253	0.192249
2018	350800	820000	944961	139592	208170	127640	150180	4213500	1.54813e+06	451262	3015305	107400000	4.34549e+06	14664000	5050000	37447	129130	21.8209	57	2.78011	11.2256	0.192249
2019	350800	806700	975762	141148	210630	125130	149050	5033400	1.66988e+06	461801	3222765	104700000	4.29109e+06	14467200	4889000	38440.4	125040	24.5585	58	2.7412	11.3415	0.192249
2020	350800	820700	1003658	142761	216370	127050	153602	5649200	1.70917e+06	476936	3332925	101400000	3.52735e+06	13786800	4725000	41320	137010	25.8793	62.9	3.01366	11.4123	0.192249
2021	350800	828500	1017742	144299	220120	127130	114119	5333000	1.78731e+06	368020	3441604	98800000	3.45492e+06	13725600	4602000	39463.5	169470	22.9712	63.6	2.92139	11.4848	0.192249
2022	350800	831600	1052603	151701	224240	127590	118533	5461400	1908627	391087	3614236	96300000	3.49168e+06	13716000	4465000	40591.1	197670	23.4077	64.15	2.88723	11.5605	0.192249
2023	350800	837400	1084914	158486	228130	128290	119060	5665400	2012670	432229	3766525	94000000	3.07772e+06	13706400	4328000	40291.8	200020	23.4534	65.44	2.9827	11.5607	0.192249
2008	350900	600200	1040725	87371.4	219230	130980	101500	1837800	825800	51987	548023	91928000	1.64462e+06	6.87662e+07	5323000	26972.1	2760	15.8365	46	1.96181	9.69262	0.192249
2009	350900	594300	1076578	84274.5	224010	132510	102300	2001200	889000	91562	693331	92849000	1.82631e+06	7.31214e+07	5381000	28299.6	4330	16.8835	47	2.07658	9.81057	0.192249
2010	350900	577500	1103039	82648.4	228300	134900	104190	2271900	1053200	121098	866062	92614000	2.008e+06	7.74766e+07	5402000	30769.8	6240	17.3699	47.92	2.05244	9.98802	0.192249
2011	350900	579800	1138020	84501.2	232320	137080	112060	2772400	1231000	163394	1140729	93693000	2.18969e+06	8.18318e+07	5548000	31754.9	21960	18.8442	49.2	2.2181	10.2167	0.192249
2012	350900	540100	1158674	87088.6	232710	133010	112060	3292200	1443600	195171	1421845	93848000	2.37138e+06	8.6187e+07	5513000	28950.7	28500	18.4673	50.6	2.1553	10.3573	0.192249
2013	350900	525700	1193500	89736.3	240380	133850	112060	3626400	1572900	296791	1859540	94421000	2.59797e+06	9.14839e+07	5561000	32845	29100	21.3613	51.8	2.49394	10.4823	0.192249
2014	350900	506200	1236687	90272.8	242580	132490	114210	3900200	1707800	332900	1999031	95092000	2.76617e+06	9.54327e+07	5652000	35569.5	33320	20.2065	52.9	2.38754	10.5731	0.192249
2015	350900	478300	1237055	90310.2	241940	129960	120900	4125700	1781100	416304	2480065	97092000	2.89403e+06	9.72283e+07	5911000	35652	31310	20.1762	53.55	2.60193	10.6603	0.192249
2016	350900	447100	1248910	92209.5	239650	126670	121320	4637800	1914000	401282	2669204	97131000	2.99994e+06	9.86264e+07	5826000	35544.5	30290	19.733	54.4	2.74277	10.7388	0.192249
2017	350900	461600	1212444	96052.1	201795	128000	121880	4870600	1962300	454190	2970803	90714000	3.10055e+06	9.75186e+07	5373000	34296	41440	22.689	55.7	2.5155	10.8356	0.192249
2018	350900	469900	1244494	100533	163940	89090	122612	5264800	2112100	467527	2990193	88025000	3.12958e+06	9.8516e+07	5190000	35500.6	46650	23.2672	56.7	2.6359	10.9129	0.192249
2019	350900	469500	1279542	103284	168300	89330	118669	5601600	2248200	506115	3394394	85223000	3.13996e+06	9.87567e+07	5000000	36946.3	67410	23.4886	57.6	2.60666	11.1401	0.192249
2020	350900	472400	1.32038e+06	105976	170510	89700	123579	5841400	2302000	476829	3570698	82650000	2.61845e+06	9.66056e+07	4816000	39494.4	84990	23.0998	61	3.05143	11.206	0.192249
2021	350900	477200	1.33633e+06	108004	172430	89930	123639	6456100	2402500	428546	3440640	80553000	2.58592e+06	9.68169e+07	4672000	39142.2	93270	24.0832	62.2	2.8774	11.3909	0.192249
2022	350900	481000	1.3523e+06	113478	173940	89990	95935.1	6913800	2593800	404610	3722515	78612000	2.6119e+06	9.3531e+07	4482000	42035.6	109070	23.3184	62.87	3.1753	11.5143	0.192249
2023	350900	481100	1374223	119064	177570	90730	68231.3	7182800	2737100	451866	4049201	76514000	2.31216e+06	9.24865e+07	4352000	39963.8	137080	24.5887	63.96	2.9378	11.582	0.192249
2008	360100	2249673	3200000	504161	534613	360278	190470	1711388	651495	135603	1476700	144842000	1199000	34788000	8889000	15319.4	9980	9.78669	50.52	1.16787	10.421	0.255756
2009	360100	2292119	3515500	505445	540121	363757	191060	1871995	712237	150224	1817000	145986000	1174000	35266800	8966000	17939.2	39380	11.0276	85.79	1.20044	10.5172	0.255756
2010	360100	1810600	3868000	505714	532714	364855	192960	2046590	758538	179255	2320300	145986000	1181000	36423600	8966000	20847.8	86020	13.5864	65.71	1.55256	10.6875	0.255756
2011	360100	2369035	4276200	505449	539235	370992	188890	2296977	855228	214018	2988000	150113000	1216000	37863600	8490000	21173	87390	12.7858	67.24	1.43045	10.8827	0.255756
2012	360100	2436532	4699900	503995	543518	372480	187770	2493474	930081	257808	3459900	149202000	1247000	39372000	8315000	20383.1	98690	13.3844	68.78	1.49764	10.9866	0.255756
2013	360100	2460660	2155100	502360	547800	370053	186650	2.66125e+06	983203	309934	4193700	148862000	1284000	40330800	8173000	21972	105700	14.2829	69.83	1.46842	11.0883	0.255756
2014	360100	2211000	2267100	498769	538100	368694	188990	2.83628e+06	1.04441e+06	354848	4731600	148862000	1244000	40590000	4278000	18695	130350	11.1022	70.86	1.26592	11.1683	0.255756
2015	360100	2217400	2394900	491939	528400	361600	188990	2.96921e+06	1.1557e+06	379786	5431800	149016000	1215000	40405200	5101000	23616.3	137590	15.3672	71.56	1.73377	11.2498	0.255756
2016	360100	2217500	2332800	484831	518700	357243	189770	3.0434e+06	1.26222e+06	347070	5832600	142994000	1200000	40471200	5095000	22487.7	77770	14.0419	72.29	1.57405	11.3298	0.255756
2017	360100	2174100	2451100	478759	500283	354100	189770	3.10045e+06	1.35382e+06	403273	6531200	141395000	1196000	40753200	4899000	24004.8	84400	15.372	73.32	1.63445	11.4264	0.255756
2018	360100	2144800	2564600	473321	486707	348393	189800	3.21011e+06	1.4174e+06	429807	7524100	134902000	1002000	40305600	3314000	27155.3	118440	15.3431	74.23	1.8438	11.5044	0.255756
2019	360100	2115000	2684800	469395	464422	328768	189900	3.6053e+06	1.47725e+06	471801	8341100	132650000	954000	40033200	3296000	21404.4	130510	12.5562	75.16	1.50338	11.556	0.255756
2020	360100	2117700	2795300	466687	484360	344800	189940	4.0162e+06	1.5462e+06	622172	8381700	129655000	959000	40201200	3219000	23266.8	171570	12.9494	78.08	1.74401	11.5787	0.255756
2021	360100	2.1452e+06	2896400	467868	483800	344903	190000	4.11112e+06	1.67237e+06	635229	8700100	129302270	912000	39120000	3136620	26804.8	208880	17.0491	78.64	1.87996	11.7213	0.255756
2022	360100	2105668	2966600	477745	483549	345210	207710	4317898	1769073	646541	9390400	127945550	928000	37560000	2950040	27205.7	371870	15.9304	78.92	1.93393	11.7938	0.255756
2023	360100	2.14811e+06	3082800	484176	483533	344540	206930	4.26959e+06	1.81427e+06	719690	9255500	128225900	944000	37080000	2910490	27367.4	399870	17.407	79.5788	1.91942	11.7894	0.255756
2008	360200	545000	1188400	119112	149990	91530	53350	480258	259288	42553	400334	30913000	573616	6.9852e+06	2068000	19550.7	1920	11.5737	40.03	1.45226	9.92077	0.255756
2009	360200	568100	1362700	118497	152630	92520	53360	508692	278938	62688	579303	30297000	623768	7.44398e+06	1901000	16408.3	1930	10.6914	68.06	1.185	10.031	0.255756
2010	360200	575300	1.53647e+06	117645	155670	93370	53360	575807	326503	70745	778735	30297000	673920	7.90276e+06	1901000	18659.1	5240	11.8877	56.31	1.43468	10.2501	0.255756
2011	360200	586200	1.71023e+06	117202	156060	93560	52410	671569	359072	103502	987449	32943000	724073	8.36153e+06	1428000	20957.9	10330	12.6196	57.96	1.58905	10.4431	0.255756
2012	360200	603400	1884000	117336	156680	93730	51230	729396	394740	133058	1213534	34009000	774225	8.82031e+06	1450000	22282.3	16630	13.8417	59.85	1.64455	10.5371	0.255756
2013	360200	620600	723100	117814	157300	93900	50050	782371	416829	151524	1358864	34103000	784717	9.39734e+06	1518000	21452.1	20480	11.9679	61.05	1.4324	10.6191	0.255756
2014	360200	629200	773500	116687	161900	94980	51370	826652	446154	186121	1493014	35033000	827952	9.1542e+06	1536000	18638.2	17410	10.5467	62.28	1.34017	10.6918	0.255756
2015	360200	636000	823900	115437	163370	95370	52090	879606	481176	244045	1726481	35752000	857375	9.14081e+06	1554000	21731.7	18630	13.2303	63.53	1.50376	10.743	0.255756
2016	360200	647300	820967	115940	166570	97020	52090	878036	501669	189688	1729525	35590000	871231	8.88802e+06	1555000	20717.6	18440	11.7713	64.79	1.46031	10.814	0.255756
2017	360200	588200	818033	117702	167880	96140	52300	945408	593564	137276	1921244	34928000	893759	9.56272e+06	1483000	23168.4	20270	13.4528	65.95	1.71583	10.8179	0.255756
2018	360200	609200	815100	119100	169960	97380	52300	978506	621086	138829	2043550	33935000	875236	1.00486e+07	1433000	24523.3	29860	14.4421	66.94	1.69434	10.8158	0.255756
2019	360200	620200	858500	120051	172840	99110	52300	1.05166e+06	646354	158068	2361873	32628000	861473	9.82985e+06	1357000	22284.8	41390	14.6304	68.05	1.62928	10.8996	0.255756
2020	360200	627400	901500	121367	170050	95480	52300	1.17432e+06	693143	190699	2360689	31596000	865229	9.85423e+06	1308000	23415.6	47290	14.9757	65.02	1.715	10.9325	0.255756
2021	360200	557200	941700	123511	170760	95540	52000	1.22477e+06	727260	191294	2260057	30794000	874697	9.90692e+06	1263000	25253.2	93400	14.8967	65.94	1.94508	11.0736	0.255756
2022	360200	546100	1039200	128152	172950	95630	52300	1.30309e+06	773649	201850	2475501	30515000	889513	9.9403e+06	1234000	24344.8	87930	14.0941	66.48	1.77764	11.1462	0.255756
2023	360200	561900	1.04673e+06	131719	173665	95630	52300	1.3167e+06	804099	226565	2399481	30305320	865246	9.78007e+06	1221480	25783.3	135930	15.2093	67.51	1.9859	11.1507	0.255756
2008	360300	534700	1079400	88288.1	127023	78830	37820	521551	203101	52302	508546	40325000	462163	5.58604e+06	2635000	19173.9	4590	11.835	31.16	1.46514	9.9459	0.255756
2009	360300	543400	1265500	87100.3	130755	79730	37310	582149	224358	74320	696353	36150000	480084	5.70997e+06	2670000	18570.2	8590	12.0975	60.39	1.2793	10.0234	0.255756
2010	360300	548300	1421100	85708.3	133000	81410	37310	669669	256591	78575	866977	36203000	498004	5.83391e+06	2670000	17669.6	10330	11.0847	59.17	1.17774	10.228	0.255756
2011	360300	561400	1556400	83509.9	132801	82110	34650	769625	282295	101638	1087143	36618000	515924	5.95785e+06	3229000	18127.8	14220	11.6287	60.77	1.34653	10.4512	0.255756
2012	360300	571750	1702400	80905.6	141472	82760	37760	823174	307595	129650	1343449	39734000	533844	6.08178e+06	2085000	18372.3	17340	11.1857	62.31	1.22272	10.548	0.255756
2013	360300	582100	829200	78479.1	143014	83410	40870	872409	322998	144068	1496007	39862000	522722	6.25983e+06	2123000	19287.9	20090	11.9744	63.45	1.43018	10.6271	0.255756
2014	360300	573550	798300	75337.9	144086	81940	42690	910430	342350	171477	1565483	39509000	534562	5.91035e+06	2107000	20956.5	23940	11.661	64.61	1.41164	10.6837	0.255756
2015	360300	565000	823300	72402	145725	80470	42690	979559	377720	188520	1858015	39150000	537747	5.73313e+06	2051000	19670.7	14410	11.3873	65.88	1.34029	10.7364	0.255756
2016	360300	556450	576400	72247.3	145876	79000	42690	921151	402038	205968	2000197	38989000	542902	5.53851e+06	2007000	22039.4	16930	14.3154	67.03	1.61786	10.8181	0.255756
2017	360300	547900	583500	74166.9	111112	77530	42670	939283	421426	199582	2249377	33741000	563179	6.0257e+06	1820000	25206.5	22120	15.0656	68.21	1.78641	10.8234	0.255756
2018	360300	508800	550700	76949.8	113690	74330	42680	952452	444750	196441	2450954	32211000	565485	6.49237e+06	1738000	27193.1	26350	15.3095	69.07	2.00604	10.8288	0.255756
2019	360300	510600	573600	78693.2	114042	74720	42690	1.08991e+06	465006	208680	2757979	31220000	564695	6.44346e+06	1665000	21352.1	28750	13.384	70.01	1.6449	10.7472	0.255756
2020	360300	492500	597300	79841.8	114634	74790	42690	1.23222e+06	482886	230422	2815184	29702000	569194	6.48264e+06	1614000	25656.3	32080	15.7678	67.81	1.93995	10.7846	0.255756
2021	360300	501800	621300	80467.6	118380	74840	43000	1.23768e+06	498932	238339	2899651	29632800	569868	6.45439e+06	1469150	22557.4	111550	12.564	68.77	1.57642	10.9273	0.255756
2022	360300	486800	650200	84056.8	122282	74830	44920	1305761	535367	253932	3067908	29435000	583443	6.51998e+06	1439240	27927.3	62060	15.4895	69.36	1.85984	10.9732	0.255756
2023	360300	461500	665600	86966.1	120044	72260	45320	1.24562e+06	555663	282467	3256737	28657400	571270	6.4572e+06	1319640	23030.9	101000	12.8277	70.42	1.60951	10.9628	0.255756
2008	360400	1449800	2710300	568025	571282	258637	177730	1341480	604328	155386	1044200	158413000	2.87313e+06	40204800	8625000	19306.3	7550	11.2426	27.99	1.36113	9.57881	0.255756
2009	360400	1534800	3201060	565115	572336	266446	179770	1475936	657803	208994	1346264	153203000	3.05623e+06	40305600	9365000	20515.5	6840	13.4193	48.78	1.51617	9.7369	0.255756
2010	360400	1534700	3.61492e+06	560787	567992	273117	179770	1657157	768921	221972	1665230	153203000	3.23933e+06	40406400	9365000	18471.5	11250	11.2889	42.52	1.2361	9.93924	0.255756
2011	360400	1555600	4.02877e+06	553971	571138	275850	207770	1827536	834002	308788	2252232	159206000	3.42243e+06	40507200	11333000	21665.4	20470	12.2415	44.38	1.66657	10.127	0.255756
2012	360400	1583200	4442630	546429	570944	275938	203040	2000138	910320	354633	2980139	158623000	3.60553e+06	40608000	12032000	19889.7	37220	11.1748	46.27	1.52157	10.2372	0.255756
2013	360400	1608000	2.06484e+06	541255	570750	276624	198310	2.20536e+06	988637	456637	3382022	158753000	3.60511e+06	40708800	11772000	19204.9	46490	11.1767	47.67	1.31161	10.3585	0.255756
2014	360400	1651900	2140781	537902	565890	278742	201250	2.33805e+06	1.02821e+06	572563	3835284	159039000	3.8167e+06	40870800	11147000	22463.5	44780	14.2579	49.1	1.57892	10.4542	0.255756
2015	360400	1658600	2250895	533204	561300	277842	203170	2.46824e+06	1.10949e+06	607516	4428630	155626000	3.96023e+06	39957600	11277000	21452.5	44790	13.9119	50.56	1.60639	10.5141	0.255756
2016	360400	1725900	2209882	528702	562195	286525	203910	2.89476e+06	1.29873e+06	594264	4685138	153704000	3.97293e+06	38482800	10976000	22660.8	47170	12.8923	52.18	1.66177	10.6044	0.255756
2017	360400	1536000	2295536	526796	546082	282446	208390	2.99401e+06	1.30463e+06	644926	5250146	151004000	4.00017e+06	39183600	10783000	20831.2	59240	12.1941	53.77	1.44027	10.739	0.255756
2018	360400	1536000	2376774	527452	543038	270341	197630	3.13404e+06	1.38018e+06	552933	5562830	140783000	3.87611e+06	38257200	10591000	22358.9	103750	12.5004	55.27	1.64508	10.8518	0.255756
2019	360400	1512600	2453833	527694	522256	267842	198320	3.516e+06	1.56041e+06	588080	6517998	119814000	3.78668e+06	37641600	5575000	21284.6	118410	12.2715	56.78	1.5271	10.9929	0.255756
2020	360400	1430200	2564691	527330	543165	274253	198490	3.81387e+06	1.62197e+06	755588	6481837	106540000	3.75935e+06	36052800	4859000	26989.5	152350	16.2263	61.18	1.99521	11.0334	0.255756
2021	360400	1456600	2645738	534891	545150	274065	199000	4.13494e+06	1.70545e+06	763889	6244689	105345600	3.78807e+06	34464000	4786760	27474.5	268600	15.3324	62.15	1.98958	11.1784	0.255756
2022	360400	1432400	2772667	566583	547130	274082	201760	4377690	1819900	814979	6917463	104700000	3.93269e+06	32875200	4754080	24909	367680	16.0648	62.72	1.70905	11.2534	0.255756
2023	360400	1468100	2854199	587946	545103	274071	204300	4.38917e+06	1.89955e+06	890445	7515195	103599210	3.86215e+06	31286400	4702980	28051.1	515260	15.6542	63.82	2.03134	11.2075	0.255756
2008	360500	573700	884820	116472	141264	98130	47480	531376	238847	42592	446101	25949000	646119	7.10723e+06	3455000	19979.7	9960	13.1841	55.85	1.34123	10.3938	0.255756
2009	360500	600600	991216	116813	138829	99260	47380	568842	250637	53324	587110	27183000	229000	7.49943e+06	1952000	19325	920	10.9198	58.45	1.38937	10.5676	0.255756
2010	360500	589500	1115100	116795	138129	100580	47380	649474	310511	61048	776911	27183000	302000	7.89163e+06	1952000	18909.8	14030	12.2801	61.59	1.35035	10.8872	0.255756
2011	360500	534000	1210100	116113	137289	99720	46290	737911	343870	69108	1026854	31592000	375000	8.28384e+06	1959000	21844.4	8880	12.5884	63.58	1.59246	11.0861	0.255756
2012	360500	582200	1283227	115417	136462	101030	48740	801641	374543	83449	1261187	28088000	448000	8.67604e+06	1970000	21346.4	21140	12.9355	65.59	1.57207	11.1405	0.255756
2013	360500	598000	570915	114594	137342	100040	51190	843683	389212	90469	1270558	30130000	521000	2282400	1902000	18094.7	16830	10.9289	66.43	1.26639	11.1498	0.255756
2014	360500	602800	602001	113784	135281	99500	51190	895460	410751	99800	1315025	40157000	594000	5713200	1804000	18507.1	23800	12.0788	67.43	1.28373	11.2066	0.255756
2015	360500	607100	634839	112437	135701	99790	53380	941498	444565	103335	1532731	41213000	558000	6162000	1897000	21628.4	37650	13.6217	68.45	1.50006	11.247	0.255756
2016	360500	613500	631944	111747	133880	99210	53780	1.03048e+06	469165	113885	1531681	43181000	561000	6997200	1822000	25379.5	38290	16.4502	68.86	1.70724	11.3334	0.255756
2017	360500	614400	627436	110961	135381	99940	54560	933166	389356	133548	1601894	42923000	577000	8948400	1822000	26520.5	43230	15.1675	70.01	1.88401	11.3453	0.255756
2018	360500	620100	621425	111200	136408	100550	54810	970062	405902	137538	1403517	35309000	666000	9446400	1699000	21312.2	52780	13.9223	70.03	1.54247	11.3168	0.255756
2019	360500	621500	647074	111531	137976	100830	54860	1.08814e+06	427411	147713	1581810	35739000	659000	6920400	1539000	24598.2	62230	15.924	70.08	1.77756	11.2614	0.255756
2020	360500	550100	677726	112149	141851	101130	54860	1.20572e+06	448090	152235	1638238	32565000	972000	6996000	1415000	24497.1	73570	14.5094	73.59	1.88602	11.2908	0.255756
2021	360500	563600	709031	112857	135871	102220	57000	1.24835e+06	459154	119219	1575011	33047000	1123300	7124760	1497650	25987.7	123440	14.8524	74.14	1.89617	11.4339	0.255756
2022	360500	556300	746700	115822	142453	102250	58450	1322649	482103	130138	1921437	32995000	1206000	6620400	1381110	24951.9	92640	14.1561	74.43	1.74484	11.5226	0.255756
2023	360500	567000	774644	118415	145912	102240	60050	1.31373e+06	513886	171226	2071191	33072600	1144000	6714000	1326350	26533.2	134880	15.1641	75.08	1.93597	11.5306	0.255756
2008	360600	604400	3100550	140569	571282	108950	51410	455196	184466	30896	320029	32575000	704889	8.56559e+06	3065000	19391.1	4590	12.6771	30.61	1.41505	10.0034	0.255756
2009	360600	639300	3528400	140316	572336	114870	51410	494562	196272	52472	408107	29835000	756768	9.02282e+06	2192000	15900.7	11360	10.3517	54.31	1.21082	9.97266	0.255756
2010	360600	640000	3947100	139842	567992	116240	51410	526739	203629	57226	574568	29835000	808647	9.48005e+06	2192000	17100.5	11460	10.9173	47.4	1.31493	10.2502	0.255756
2011	360600	654700	4393650	139289	571138	116670	45020	607563	224912	57423	681157	28150000	860526	9.93728e+06	1330000	21052.8	2370	12.6299	49.44	1.46372	10.4645	0.255756
2012	360600	675500	4847950	138278	570944	118135	51750	653082	246172	67711	879700	29036000	912405	1.03945e+07	1459000	18326	8980	11.9047	51.25	1.35583	10.5684	0.255756
2013	360600	696300	2154900	137527	570750	119600	58480	701596	265217	86166	1004526	29951000	916018	1.09697e+07	1554000	23630.8	19510	14.5051	52.73	1.58285	10.7006	0.255756
2014	360600	709075	2.26669e+06	136405	565890	120175	52740	752867	281912	117302	1149939	31382000	967862	1.07011e+07	1635000	22160.5	28810	13.9095	54.23	1.54566	10.7754	0.255756
2015	360600	721850	2.38638e+06	135055	561300	120750	52740	795631	321912	110227	1277407	31584000	1.00309e+06	1.06943e+07	1605000	24990.9	5360	14.4665	55.78	1.69602	10.8244	0.255756
2016	360600	734625	2411125	134342	562195	121325	52870	821295	344850	111053	1280314	33329000	1.00951e+06	1.02987e+07	1618000	24757.4	12180	15.7396	57.48	1.76866	10.9027	0.255756
2017	360600	747400	2.52607e+06	134329	546082	121900	52890	873301	372118	129473	1283534	32896000	1.02001e+06	1.09136e+07	1510000	21095.3	39620	13.7132	59.08	1.57167	10.9879	0.255756
2018	360600	747900	2.63861e+06	134410	543038	121500	52890	907888	391307	112754	1403250	32851000	987745	1.13404e+07	1461000	21722.5	42680	13.0223	60.68	1.54598	11.0586	0.255756
2019	360600	749400	2754500	134493	522256	123200	52890	1.0483e+06	420471	131318	1549301	27377000	965107	1.10124e+07	1384000	22814	33440	13.1888	62.04	1.70616	11.1975	0.255756
2020	360600	660000	2867800	134774	543165	124900	52890	1.2013e+06	453184	151278	1889693	28968000	960808	1.09428e+07	1331000	23575.2	73830	13.9972	64.41	1.80835	11.2411	0.255756
2021	360600	668900	2977000	135224	545150	124980	53000	1.22665e+06	484683	168862	1889479	29383360	957646	1.08464e+07	1267690	24759.2	144860	16.2092	65.43	1.67647	11.3928	0.255756
2022	360600	660000	3067100	137098	547130	125010	53130	1288892	513185	174807	2084160	29304330	951607	1.06342e+07	1258010	29463.5	93170	18.4776	66.04	2.22794	11.4718	0.255756
2023	360600	678000	3181500	138740	545103	125110	55000	1.23572e+06	534542	219175	2498121	29460470	911371	1.03014e+07	1279200	25278.9	133730	16.5494	67.13	1.71166	11.5048	0.255756
2008	360700	2444100	4027003	517011	740042	496145	260210	2805547	1284503	236612	1571326	221107000	2.40524e+06	2.93164e+07	14589000	16892.3	16620	10.2348	22.15	1.2484	9.14755	0.255756
2009	360700	2516800	4741943	509651	732215	486499	261280	3053856	1404894	303802	2083492	224100000	2.62977e+06	3.13956e+07	12545000	19986.4	20570	11.8158	22.24	1.42499	9.25784	0.255756
2010	360700	2359000	5482821	500516	727928	478823	261280	3377855	1560450	338247	2396873	224109000	2.8543e+06	3.34748e+07	12545000	19807.6	51500	12.124	37.53	1.45334	9.42075	0.255756
2011	360700	2531700	6085291	498353	752223	494247	245400	3750930	1737458	411722	3118366	226426000	3.07882e+06	3.5554e+07	14001000	17359.4	80780	9.54547	39.34	1.16835	9.58525	0.255756
2012	360700	2529900	6674417	500633	753449	493279	262160	4053589	1897601	548165	4041635	229679000	3.30335e+06	3.76332e+07	14706000	19617	82340	12.5624	41.16	1.51171	9.69757	0.255756
2013	360700	2564900	2897280	505387	749127	496192	278920	4.35904e+06	2.05389e+06	605971	4808080	238905000	3.36621e+06	4.03119e+07	14457000	20011.2	60830	12.566	42.56	1.51868	9.79933	0.255756
2014	360700	2586700	3051752	505320	756137	499630	279540	4.60788e+06	2.1784e+06	742752	5362745	236385000	3.58551e+06	3.96429e+07	15327000	19490.6	49390	11.5993	43.99	1.3674	9.86894	0.255756
2015	360700	2616400	3218077	508456	763233	505336	285040	4.80589e+06	2.35753e+06	807145	6150812	241122000	3.77643e+06	4.0262e+07	15444000	20026.8	64120	12.5738	45.51	1.47073	9.9305	0.255756
2016	360700	2627900	2977030	518098	775347	510219	288360	5.35262e+06	2.51616e+06	946710	6768244	238533000	3.89325e+06	3.97177e+07	15138000	25171.6	118740	15.6586	47.13	1.91208	10.0315	0.255756
2017	360700	2627527	3095496	530819	774783	509372	288000	5.35512e+06	2.80691e+06	955119	7763343	229977000	4.03072e+06	4.31264e+07	14659000	22262.3	165820	13.5051	48.72	1.58999	10.1559	0.255756
2018	360700	2679490	3182548	540558	773484	509072	289900	5.45797e+06	2.89293e+06	914987	8575883	179083000	3.97243e+06	4.56077e+07	10065000	24747.7	215310	14.8418	50.29	1.90731	10.2617	0.255756
2019	360700	2696415	3311200	542500	772202	509203	290390	6.08064e+06	3.0371e+06	936611	10074419	167079000	3.89293e+06	4.44203e+07	8272000	26918	260960	15.1561	51.85	1.92676	10.4728	0.255756
2020	360700	2585001	3454099	548981	769154	502867	290930	6.74398e+06	3.16276e+06	1282286	9767563	154035000	3.9137e+06	4.45738e+07	7599000	28283.2	336110	16.6169	51.85	2.06329	10.5203	0.255756
2021	360700	2618201	3572936	553573	788495	503067	291620	6.96576e+06	3.40355e+06	1313513	9610938	154191000	3.92038e+06	4.44026e+07	7611000	28559.8	420570	16.5126	56.35	2.02437	10.6541	0.255756
2022	360700	2574767	3765821	571818	790864	503845	293730	7368540	3690180	1340355	10276606	152680000	3.96902e+06	4.43538e+07	7538950	24012.5	646970	13.3579	57	1.77336	10.7338	0.255756
2023	360700	2654027	3962972	588091	799694	504313	296700	7.40959e+06	3.96162e+06	1461869	10936345	151683700	3.86311e+06	4.36656e+07	7475490	29159.2	965190	16.8591	58.18	2.06686	10.7511	0.255756
2008	360800	3598400	3950200	574543	746667	642850	297020	2012556	977900	184631	1002202	159390000	2.79036e+06	3.39148e+07	10468000	19534.7	12200	11.1948	23.02	1.31806	9.25024	0.255756
2009	360800	3735500	4471400	568761	753333	645550	291040	2189505	1033772	247149	1280670	169758000	2.9996e+06	3.57671e+07	12509000	20407	17180	11.9529	41.57	1.55906	9.38786	0.255756
2010	360800	3746800	5.02557e+06	559775	760000	651600	291040	2453433	1180712	286000	1583585	169758000	3.20884e+06	3.76194e+07	12509000	18879.4	34400	12.5043	37.59	1.3035	9.58568	0.255756
2011	360800	3855500	5.57973e+06	553265	766667	650070	316260	2801917	1339645	326927	1972186	175936000	3.41807e+06	3.94716e+07	12631000	17194.9	64690	9.65448	39.62	1.29802	9.77139	0.255756
2012	360800	3987600	6133900	549729	773333	656800	304690	3043268	1468640	449967	2469444	182631000	3.62731e+06	4.13239e+07	14178000	18689.7	87650	11.8538	41.62	1.2705	9.89879	0.255756
2013	360800	4119700	2689600	550562	780000	663530	293120	3.31543e+06	1.58841e+06	493214	2852905	181175000	3.66711e+06	4.39152e+07	14273000	18426	74440	11.6535	43.13	1.36272	10.0023	0.255756
2014	360800	4148950	2825125	550714	786667	660610	291900	3.50404e+06	1.69626e+06	566350	3086929	186718000	3.9076e+06	4.32042e+07	13503000	18894.6	92020	11.1445	44.65	1.30057	10.0683	0.255756
2015	360800	4178200	2960650	548159	793333	657690	293970	3.64708e+06	1.79579e+06	662615	3596439	187881000	4.07131e+06	4.34058e+07	13098000	21188	105280	12.6218	46.17	1.53672	10.1286	0.255756
2016	360800	4207450	3096175	548104	800000	654770	296780	4.31156e+06	1.88292e+06	663129	3831014	186311000	4.11872e+06	4.20179e+07	12878000	21996.6	110860	13.7759	47.76	1.50096	10.2152	0.255756
2017	360800	4236700	3231700	551614	806667	651850	297400	3.86169e+06	1.83538e+06	660730	4332153	184854000	4.18862e+06	4.48159e+07	12148000	21908.4	156220	14.2931	49.37	1.64238	10.3051	0.255756
2018	360800	4240900	3394300	560743	813333	648930	297460	3.82797e+06	1.82309e+06	622896	4845240	172593000	4.12076e+06	4.73107e+07	10759000	26889.2	199550	17.6569	50.95	1.9437	10.3835	0.255756
2019	360800	4188200	3531300	566250	820000	646010	297850	4.15986e+06	1.82254e+06	636938	5427662	162364000	4.06336e+06	4.6365e+07	6421000	21827.7	228430	12.8758	52.52	1.59232	10.5613	0.255756
2020	360800	3670000	3708800	571164	826667	643090	301740	4.59716e+06	1.89874e+06	724954	5556528	150969000	4.07184e+06	4.63749e+07	5870000	27859.8	329080	18.0232	52.35	1.90301	10.6022	0.255756
2021	360800	3716700	3893000	572697	833333	640170	305000	4.88238e+06	2.04741e+06	742699	5594237	151615000	4.05582e+06	4.59366e+07	5878150	23699.1	410630	14.3121	53.41	1.75198	10.7569	0.255756
2022	360800	3654000	4174000	586214	840000	640540	322270	5193944	2195434	805219	6108192	150586600	4.06894e+06	4.54705e+07	5748080	29022.5	548750	17.0052	54.07	1.93295	10.84	0.255756
[truncated: 2,593 more rows]
